# Supplementary material for: Non-monotonic size-dependent exciton radiative lifetime in CsPbBr3 nanocrystals
Source: Springer Nature journal article supplement (doi:10.1038/s41467-025-60848-5), 2025-07-10
Supplement: MOESM3 [file 41467_2025_60848_MOESM3_ESM.xlsx]

## Sheet: Fig1
Abs.								PL										Stokes and FWHM
Wavelength nm.	Abs.		Wavelength nm.	Abs.		Wavelength nm.	Abs.		Energy [eV]	Intesnity Norm		Energy [eV]	Intesnity Norm		Energy [eV]	Intesnity Norm		PL Peak [nm]	PL Peak [eV]	Stoke Shift [eV]	PL FWHM [eV]
400	0.3517		400	0.2689		400	0.1748		3.99952	0.00010558		3.99952	0.000372895		3.99952	0.000410028		484	2.56168	0.0540438	0.127103
401	0.3484		401	0.2594		401	0.1645		3.98666	0.00015823		3.98666	0.000327317		3.98666	0.000380515		486	2.55114	0.0590789	0.1208
402	0.3474		402	0.2538		402	0.1566		3.97388	7.50809e-05		3.97388	0.000275689		3.97388	0.000365656		490	2.53031	0.0581073	0.108492
403	0.3422		403	0.245		403	0.1513		3.96119	9.72756e-05		3.96119	0.000249798		3.96119	0.000398201		492	2.52002	0.0576305	0.11787
404	0.3363		404	0.2377		404	0.1439		3.94857	0.000107733		3.94857	0.000292308		3.94857	0.000303156		495	2.50475	0.0516443	0.10631
405	0.3309		405	0.2293		405	0.137		3.93604	9.98353e-05		3.93604	0.000402468		3.93604	0.00029501		499	2.48467	0.0456368	0.0946411
406	0.3257		406	0.224		406	0.1356		3.92358	8.12965e-05		3.92358	0.00032109		3.92358	0.00035174		500	2.4797	0.0352088	0.0843343
407	0.3159		407	0.2187		407	0.1316		3.9112	0.000125194		3.9112	0.000332284		3.9112	0.000457268		500	2.4797	0.0352088	0.0843343
408	0.3092		408	0.2132		408	0.1272		3.8989	0.000110353		3.8989	0.000251355		3.8989	0.000349381		500	2.4797	0.0352088	0.0892983
409	0.3025		409	0.2063		409	0.1232		3.88668	8.78698e-05		3.88668	0.000256032		3.88668	0.000333		500	2.4797	0.0352088	0.0892983
410	0.2935		410	0.2021		410	0.1187		3.87454	0.000109067		3.87454	0.000309314		3.87454	0.00031763		501	2.47475	0.0350674	0.0839979
411	0.2833		411	0.1985		411	0.1155		3.86247	0.000105342		3.86247	0.000290086		3.86247	0.00035841		501	2.47475	0.0452699	0.0988319
412	0.2747		412	0.1934		412	0.1126		3.85047	0.000130277		3.85047	0.000289073		3.85047	0.000279028		501	2.47475	0.0350674	0.0839979
413	0.266		413	0.1893		413	0.1092		3.83855	0.000118936		3.83855	0.000311888		3.83855	0.000375721		502	2.46982	0.0399972	0.0935129
414	0.2568		414	0.1843		414	0.1048		3.8267	0.000117993		3.8267	0.000352194		3.8267	0.000250021		503	2.46491	0.0449073	0.0931413
415	0.2494		415	0.183		415	0.1035		3.81493	9.61792e-05		3.81493	0.00024955		3.81493	0.000344104		503	2.46491	0.0449073	0.0931413
416	0.2438		416	0.1786		416	0.1005		3.80323	0.000130846		3.80323	0.000353768		3.80323	0.000404534		503	2.46491	0.0449073	0.0931413
417	0.2388		417	0.1793		417	0.0995		3.7916	0.00011275		3.7916	0.000345552		3.7916	0.000346371		504	2.46002	0.0246495	0.0781157
418	0.2318		418	0.1741		418	0.0953		3.78004	0.000139927		3.78004	0.000442318		3.78004	0.000459132		505	2.45515	0.0245515	0.0778065
419	0.2268		419	0.1728		419	0.094		3.76855	0.000110858		3.76855	0.00054956		3.76855	0.000530538		506	2.4503	0.0294036	0.0823456
420	0.2226		420	0.1703		420	0.0907		3.75713	0.000158117		3.75713	0.000529139		3.75713	0.000618505		506	2.4503	0.0294036	0.0774992
421	0.2199		421	0.1681		421	0.0902		3.74578	0.000140021		3.74578	0.000443528		3.74578	0.00046774		506	2.4503	0.0244541	0.0726533
422	0.2166		422	0.1668		422	0.0886		3.73449	0.00014898		3.73449	0.000418268		3.73449	0.000412832		507	2.44547	0.0194471	0.082021
423	0.2128		423	0.1654		423	0.0864		3.72328	8.72983e-05		3.72328	0.000297378		3.72328	0.000434072		506	2.4503	0.0294036	0.0823456
424	0.2093		424	0.1632		424	0.085		3.71213	9.99052e-05		3.71213	0.000300023		3.71213	0.000314753		467	2.65493	0.0820508	0.142229
425	0.207		425	0.1612		425	0.0857		3.70105	0.000132155		3.70105	0.00033046		3.70105	0.000357062		467	2.65493	0.0820508	0.153625
426	0.2049		426	0.1583		426	0.083		3.69003	9.11403e-05		3.69003	0.000315019		3.69003	0.00037081		472	2.6268	0.0743975	0.150385
427	0.203		427	0.1542		427	0.0817		3.67909	9.96602e-05		3.67909	0.00029977		3.67909	0.000303612		469	2.64361	0.0694164	0.152317
428	0.2014		428	0.154		428	0.0816		3.6682	0.000123756		3.6682	0.00031691		3.6682	0.000319228		479	2.58842	0.0608389	0.135187
429	0.1998		429	0.1505		429	0.0812		3.65738	7.53047e-05		3.65738	0.000255675		3.65738	0.000362729		478	2.59383	0.066794	0.14663
430	0.1971		430	0.1488		430	0.0821		3.64662	8.6557e-05		3.64662	0.000328449		3.64662	0.000369021		481	2.57765	0.0659528	0.144806
431	0.1957		431	0.1459		431	0.0782		3.63593	0.000104115		3.63593	0.000239668		3.63593	0.000383798		484	2.56168	0.0540438	0.127103
432	0.1933		432	0.1449		432	0.0788		3.6253	9.45538e-05		3.6253	0.00022288		3.6253	0.000334158		489	2.53548	0.0475403	0.108936
433	0.191		433	0.1416		433	0.0782		3.61473	9.70982e-05		3.61473	0.000317412		3.61473	0.00032663		501	2.47475	0.0401583	0.0839979
434	0.1888		434	0.1406		434	0.077		3.60422	8.44206e-05		3.60422	0.000300123		3.60422	0.000388137
435	0.1869		435	0.1389		435	0.0777		3.59377	8.06158e-05		3.59377	0.000247876		3.59377	0.000378546
436	0.1863		436	0.1363		436	0.078		3.58339	9.75509e-05		3.58339	0.000280305		3.58339	0.000357924
437	0.1836		437	0.1343		437	0.0775		3.57306	4.10829e-05		3.57306	0.000277826		3.57306	0.000298849
438	0.1821		438	0.1322		438	0.079		3.56279	7.5645e-05		3.56279	0.000265527		3.56279	0.000380639
439	0.1808		439	0.1302		439	0.0793		3.55258	0.00011801		3.55258	0.000295837		3.55258	0.000320151
440	0.1803		440	0.1269		440	0.0813		3.54243	8.53179e-05		3.54243	0.000278507		3.54243	0.000366182
441	0.1784		441	0.1266		441	0.0835		3.53234	0.000107147		3.53234	0.000276226		3.53234	0.000325531
442	0.1757		442	0.125		442	0.0859		3.52231	0.000100638		3.52231	0.000264764		3.52231	0.000312587
443	0.1754		443	0.1237		443	0.0874		3.51233	9.69948e-05		3.51233	0.000275991		3.51233	0.000334471
444	0.175		444	0.1219		444	0.0896		3.50241	9.60957e-05		3.50241	0.000273193		3.50241	0.000342065
445	0.174		445	0.1222		445	0.093		3.49254	7.61267e-05		3.49254	0.000261431		3.49254	0.000339516
446	0.171		446	0.1213		446	0.0959		3.48273	0.000102458		3.48273	0.000321575		3.48273	0.000315932
447	0.1707		447	0.1217		447	0.0987		3.47297	9.08448e-05		3.47297	0.000323725		3.47297	0.000296653
448	0.169		448	0.1177		448	0.103		3.46327	0.000108687		3.46327	0.000294089		3.46327	0.000319888
449	0.1671		449	0.1177		449	0.1065		3.45363	0.000115554		3.45363	0.000273906		3.45363	0.00037794
450	0.1653		450	0.1175		450	0.1099		3.44403	8.84531e-05		3.44403	0.000267311		3.44403	0.000294247
451	0.1658		451	0.1158		451	0.1106		3.43449	6.47414e-05		3.43449	0.000291383		3.43449	0.000326701
452	0.1629		452	0.1145		452	0.1153		3.425	7.98777e-05		3.425	0.000268696		3.425	0.000370318
453	0.163		453	0.1147		453	0.1167		3.41557	8.43482e-05		3.41557	0.000364632		3.41557	0.000381887
454	0.1606		454	0.1127		454	0.1183		3.40619	0.000104191		3.40619	0.000278176		3.40619	0.000273796
455	0.1592		455	0.1117		455	0.1189		3.39685	0.000101334		3.39685	0.00022653		3.39685	0.000408124
456	0.1588		456	0.1112		456	0.1195		3.38757	8.82577e-05		3.38757	0.000275422		3.38757	0.000386173
457	0.1577		457	0.1084		457	0.1147		3.37834	8.02037e-05		3.37834	0.000273858		3.37834	0.000344938
458	0.1574		458	0.1076		458	0.113		3.36916	7.45791e-05		3.36916	0.000271547		3.36916	0.000377252
459	0.1565		459	0.1078		459	0.1083		3.36003	9.89317e-05		3.36003	0.000265879		3.36003	0.000368249
460	0.1547		460	0.1073		460	0.1023		3.35095	9.09686e-05		3.35095	0.000264261		3.35095	0.000348029
461	0.1524		461	0.1066		461	0.096		3.34192	8.31712e-05		3.34192	0.000271335		3.34192	0.000304454
462	0.1536		462	0.1064		462	0.0889		3.33293	6.32263e-05		3.33293	0.000326157		3.33293	0.00033959
463	0.1513		463	0.1073		463	0.08		3.324	5.79812e-05		3.324	0.000283933		3.324	0.000263707
464	0.1513		464	0.1087		464	0.0742		3.31511	9.38902e-05		3.31511	0.000258585		3.31511	0.000317703
465	0.1497		465	0.1111		465	0.0665		3.30627	0.00010071		3.30627	0.000237963		3.30627	0.000279171
466	0.149		466	0.112		466	0.0579		3.29748	5.73908e-05		3.29748	0.000272733		3.29748	0.000378373
467	0.1472		467	0.1135		467	0.0512		3.28873	8.08227e-05		3.28873	0.000274712		3.28873	0.000254151
468	0.1465		468	0.1168		468	0.0457		3.28003	5.42225e-05		3.28003	0.000258079		3.28003	0.000263031
469	0.1452		469	0.1208		469	0.0384		3.27138	8.69781e-05		3.27138	0.000288384		3.27138	0.000252516
470	0.144		470	0.1239		470	0.0323		3.26277	9.36265e-05		3.26277	0.000260437		3.26277	0.000330916
471	0.142		471	0.1262		471	0.0258		3.2542	6.53885e-05		3.2542	0.000212491		3.2542	0.000338491
472	0.1407		472	0.1292		472	0.0226		3.24568	8.61631e-05		3.24568	0.000291562		3.24568	0.000332819
473	0.1395		473	0.1312		473	0.0184		3.23721	5.77799e-05		3.23721	0.000218095		3.23721	0.000335593
474	0.1387		474	0.1326		474	0.0148		3.22878	8.04661e-05		3.22878	0.000255195		3.22878	0.000364798
475	0.1378		475	0.1323		475	0.0115		3.22039	8.71349e-05		3.22039	0.000201213		3.22039	0.000324059
476	0.1372		476	0.1323		476	0.0096		3.21205	8.51036e-05		3.21205	0.000345387		3.21205	0.000284617
477	0.1367		477	0.1295		477	0.0066		3.20375	7.61528e-05		3.20375	0.000250699		3.20375	0.000351661
478	0.1376		478	0.1252		478	0.0059		3.19549	8.5136e-05		3.19549	0.000236079		3.19549	0.00029546
479	0.1371		479	0.12		479	0.0034		3.18728	7.14233e-05		3.18728	0.000255004		3.18728	0.000317132
480	0.1361		480	0.1146		480	0.0032		3.17911	7.86708e-05		3.17911	0.000217369		3.17911	0.000343776
481	0.1377		481	0.1057		481	0.0027		3.17098	6.73571e-05		3.17098	0.000214042		3.17098	0.000349417
482	0.1376		482	0.0972		482	0.0023		3.16289	6.76003e-05		3.16289	0.000279921		3.16289	0.000408251
483	0.1372		483	0.0876		483	0.0008		3.15484	0.000107356		3.15484	0.000188766		3.15484	0.000419384
484	0.1361		484	0.0778		484	0.0006		3.14683	0.000112501		3.14683	0.000274885		3.14683	0.000415733
485	0.1359		485	0.0669		485	0.0003		3.13886	9.886e-05		3.13886	0.000260306		3.13886	0.000426123
486	0.1335		486	0.0549		486	0.0001		3.13094	6.85284e-05		3.13094	0.000268565		3.13094	0.000453906
487	0.1316		487	0.0456		487	0.0017		3.12305	0.000108896		3.12305	0.000280873		3.12305	0.000423667
488	0.1278		488	0.037		488	0.0007		3.11521	9.70196e-05		3.11521	0.000359153		3.11521	0.000397235
489	0.1248		489	0.029		489	0.0004		3.1074	9.97718e-05		3.1074	0.000328704		3.1074	0.000520426
490	0.1203		490	0.0237		490	-0.0003		3.09963	0.000100168		3.09963	0.000315371		3.09963	0.000526755
491	0.1175		491	0.0171		491	-0.0001		3.0919	9.08006e-05		3.0919	0.00031135		3.0919	0.000445926
492	0.1155		492	0.0122		492	-0.0002		3.08421	0.000102725		3.08421	0.000284244		3.08421	0.000475295
493	0.113		493	0.0082		493	0.0004		3.07656	0.000131416		3.07656	0.000425909		3.07656	0.000469096
494	0.1122		494	0.0055		494	-0.0005		3.06894	0.000143875		3.06894	0.0003043		3.06894	0.00041534
495	0.1116		495	0.0035		495	0.0008		3.06136	0.000129596		3.06136	0.000265462		3.06136	0.000398512
496	0.1134		496	0.0014		496	0.0003		3.05382	0.000146362		3.05382	0.000233761		3.05382	0.000421082
497	0.1169		497	-0.0004		497	-0.0012		3.04632	0.000167955		3.04632	0.000320537		3.04632	0.000448094
498	0.1201		498	-0.0016		498	-0.0004		3.03885	0.000177939		3.03885	0.000297104		3.03885	0.000502453
499	0.124		499	-0.0024		499	0.0013		3.03142	0.000199785		3.03142	0.000314147		3.03142	0.000370475
500	0.1274		500	-0.0025		500	-0.0009		3.02403	0.000175807		3.02403	0.00031052		3.02403	0.000366695
501	0.1288		501	-0.0037		501	0		3.01667	0.000253312		3.01667	0.000293957		3.01667	0.00040527
502	0.1287		502	-0.0038		502	0.0001		3.00935	0.000266056		3.00935	0.000294656		3.00935	0.000422951
503	0.1251		503	-0.0041		503	-0.0001		3.00206	0.000300583		3.00206	0.000255882		3.00206	0.000492592
504	0.1189		504	-0.0024		504	-0.0007		2.99481	0.000289671		2.99481	0.000252416		2.99481	0.000415202
505	0.1081		505	-0.0038		505	0.0002		2.98759	0.000411583		2.98759	0.000281462		2.98759	0.000434382
506	0.0973		506	-0.0038		506	-0.0011		2.98041	0.000412832		2.98041	0.000240834		2.98041	0.000551714
507	0.0847		507	-0.0041		507	0.0002		2.97327	0.000430714		2.97327	0.000265735		2.97327	0.000422274
508	0.0716		508	-0.0044		508	0.0002		2.96615	0.000497442		2.96615	0.000269874		2.96615	0.000496791
509	0.0589		509	-0.0033		509	0.0006		2.95907	0.000463129		2.95907	0.000299403		2.95907	0.000507972
510	0.0492		510	-0.0047		510	-0.0003		2.95203	0.000472165		2.95203	0.000306613		2.95203	0.000555916
511	0.0408		511	-0.0045		511	0.0018		2.94502	0.000483486		2.94502	0.00030324		2.94502	0.000476563
512	0.034		512	-0.0029		512	0.0004		2.93804	0.000504682		2.93804	0.000280151		2.93804	0.000623108
513	0.0292		513	-0.0041		513	-0.0003		2.93109	0.000494412		2.93109	0.000269074		2.93109	0.000868497
514	0.025		514	-0.0027		514	0.001		2.92418	0.000466377		2.92418	0.000342618		2.92418	0.000926523
515	0.0218		515	-0.0038		515	-0.0005		2.9173	0.000463133		2.9173	0.000273715		2.9173	0.00103784
516	0.0199		516	-0.0039		516	0.0003		2.91045	0.000452874		2.91045	0.000316434		2.91045	0.00114104
517	0.0172		517	-0.0041		517	-0.0009		2.90363	0.000479021		2.90363	0.000358629		2.90363	0.00133488
518	0.0159		518	-0.0047		518	0.0001		2.89685	0.000397025		2.89685	0.000293553		2.89685	0.00159601
519	0.0144		519	-0.0036		519	-0.0004		2.8901	0.000446919		2.8901	0.000330967		2.8901	0.0019638
520	0.0146		520	-0.0036		520	-0.0008		2.88338	0.0003924		2.88338	0.000344223		2.88338	0.00262892
521	0.0135		521	-0.0032		521	-0.0004		2.87669	0.000347916		2.87669	0.000420854		2.87669	0.00311762
522	0.0128		522	-0.0036		522	0.0004		2.87003	0.00039451		2.87003	0.000598892		2.87003	0.00397624
523	0.0118		523	-0.0035		523	-0.0003		2.8634	0.000334446		2.8634	0.000571458		2.8634	0.00508071
524	0.0119		524	-0.0035		524	-0.0001		2.8568	0.000414784		2.8568	0.000727474		2.8568	0.0071559
525	0.0119		525	-0.004		525	-0.0001		2.85023	0.000344897		2.85023	0.000803108		2.85023	0.00855194
526	0.0108		526	-0.0032		526	-0.0014		2.8437	0.000362466		2.8437	0.000885158		2.8437	0.0109153
527	0.0103		527	-0.004		527	0.0002		2.83719	0.000356584		2.83719	0.00114621		2.83719	0.0132134
528	0.0119		528	-0.0037		528	0.0004		2.83071	0.000355319		2.83071	0.00110091		2.83071	0.0177941
529	0.0108		529	-0.0041		529	-0.0002		2.82426	0.000371376		2.82426	0.00154562		2.82426	0.0226933
530	0.0109		530	-0.0029		530	0.0006		2.81784	0.000342595		2.81784	0.00169314		2.81784	0.0286338
531	0.0087		531	-0.0034		531	-0.0004		2.81146	0.000317925		2.81146	0.00204007		2.81146	0.0383409
532	0.009		532	-0.0032		532	-0.0007		2.80509	0.000400139		2.80509	0.00294836		2.80509	0.0502228
533	0.0093		533	-0.0032		533	-0.0003		2.79876	0.000398645		2.79876	0.00357684		2.79876	0.062547
534	0.0086		534	-0.0028		534	0.0002		2.79246	0.000433864		2.79246	0.00397993		2.79246	0.0764591
535	0.0093		535	-0.0036		535	0.0002		2.78618	0.00052305		2.78618	0.00488232		2.78618	0.0969591
536	0.0095		536	-0.0032		536	0.0006		2.77994	0.00066373		2.77994	0.00634992		2.77994	0.121044
537	0.0089		537	-0.0041		537	0.0004		2.77372	0.000742389		2.77372	0.00807752		2.77372	0.145735
538	0.0077		538	-0.0025		538	0.0003		2.76753	0.000900509		2.76753	0.00966999		2.76753	0.170956
539	0.0089		539	-0.0029		539	-0.0004		2.76136	0.000957635		2.76136	0.0120892		2.76136	0.205791
540	0.0092		540	-0.0029		540	0.0003		2.75523	0.00115052		2.75523	0.0146311		2.75523	0.241307
541	0.0079		541	-0.0024		541	0.0004		2.74912	0.00125159		2.74912	0.0177191		2.74912	0.281941
542	0.0075		542	-0.0024		542	0.0016		2.74303	0.00162126		2.74303	0.02134		2.74303	0.321838
543	0.0095		543	-0.0031		543	0.0004		2.73698	0.00203752		2.73698	0.0267625		2.73698	0.371501
544	0.0088		544	-0.0024		544	-0.0002		2.73095	0.00214991		2.73095	0.0326751		2.73095	0.422585
545	0.0084		545	-0.0035		545	-0.0008		2.72495	0.00248293		2.72495	0.0392683		2.72495	0.476858
546	0.0088		546	-0.003		546	-0.0003		2.71897	0.00289051		2.71897	0.0476902		2.71897	0.534019
547	0.0081		547	-0.0038		547	0.0002		2.71302	0.00312576		2.71302	0.0584797		2.71302	0.59884
548	0.0091		548	-0.0039		548	0.001		2.7071	0.00335781		2.7071	0.0699222		2.7071	0.655752
549	0.0085		549	-0.0041		549	0		2.7012	0.00345581		2.7012	0.082914		2.7012	0.714063
550	0.0072		550	-0.0031		550	0.0005		2.69533	0.00367844		2.69533	0.0981776		2.69533	0.770691
551	0.0076		551	-0.0014		551	0.0004		2.68948	0.00388928		2.68948	0.116128		2.68948	0.822351
552	0.0082		552	-0.0033		552	0.0006		2.68366	0.00392038		2.68366	0.134561		2.68366	0.865769
553	0.0071		553	-0.0041		553	-0.0002		2.67787	0.0041645		2.67787	0.159086		2.67787	0.910297
554	0.0078		554	-0.0037		554	-0.0003		2.67209	0.00411941		2.67209	0.186593		2.67209	0.947863
555	0.0075		555	-0.0034		555	0.0006		2.66635	0.00414669		2.66635	0.213005		2.66635	0.979424
556	0.0079		556	-0.0028		556	-0.0001		2.66063	0.00442501		2.66063	0.242632		2.66063	0.990946
557	0.0074		557	-0.0034		557	0.0007		2.65493	0.00484979		2.65493	0.273585		2.65493	1
558	0.0074		558	-0.0036		558	0.0003		2.64926	0.0052095		2.64926	0.312645		2.64926	0.996339
559	0.0081		559	-0.003		559	0.0001		2.64361	0.0060093		2.64361	0.340848		2.64361	0.986383
560	0.0079		560	-0.0022		560	-0.0001		2.63798	0.00616776		2.63798	0.383481		2.63798	0.97055
561	0.0063		561	-0.0027		561	0.0003		2.63238	0.00695443		2.63238	0.431211		2.63238	0.933411
562	0.0071		562	-0.0036		562	0.0006		2.6268	0.00765639		2.6268	0.476411		2.6268	0.89816
563	0.0071		563	-0.0026		563	-0.0003		2.62125	0.00849581		2.62125	0.52247		2.62125	0.860828
564	0.0078		564	-0.0029		564	-0.0002		2.61572	0.00902416		2.61572	0.57794		2.61572	0.81711
565	0.0078		565	-0.002		565	0		2.61021	0.0110255		2.61021	0.638408		2.61021	0.760505
566	0.0083		566	-0.0034		566	-0.0003		2.60473	0.0115249		2.60473	0.683866		2.60473	0.733476
567	0.0084		567	-0.0031		567	-0.0001		2.59927	0.012903		2.59927	0.733726		2.59927	0.687175
568	0.0077		568	-0.0021		568	0.0001		2.59383	0.0151631		2.59383	0.796549		2.59383	0.628211
569	0.0076		569	-0.0031		569	0.0005		2.58842	0.0166888		2.58842	0.847189		2.58842	0.574269
570	0.0076		570	-0.0027		570	-0.0004		2.58302	0.0196255		2.58302	0.889903		2.58302	0.532407
571	0.0077		571	-0.0024		571	0		2.57765	0.0228132		2.57765	0.933632		2.57765	0.487609
572	0.0076		572	-0.0025		572	0.0008		2.57231	0.0270195		2.57231	0.965478		2.57231	0.436362
573	0.0069		573	-0.0027		573	0.0002		2.56698	0.0313745		2.56698	0.986628		2.56698	0.404968
574	0.0073		574	-0.0021		574	0.0009		2.56168	0.0354874		2.56168	0.993325		2.56168	0.373279
575	0.0065		575	-0.0029		575	0.0005		2.5564	0.0421556		2.5564	1		2.5564	0.335423
576	0.0069		576	-0.0017		576	0.0002		2.55114	0.0496673		2.55114	0.984034		2.55114	0.303062
577	0.0067		577	-0.0027		577	-0.0003		2.5459	0.0585958		2.5459	0.961719		2.5459	0.277003
578	0.0073		578	-0.0024		578	-0.0001		2.54068	0.0678741		2.54068	0.925923		2.54068	0.249966
579	0.0069		579	-0.0027		579	0.0003		2.53548	0.0800011		2.53548	0.880663		2.53548	0.222141
580	0.0073		580	-0.0031		580	0		2.53031	0.0947239		2.53031	0.824798		2.53031	0.205739
581	0.0066		581	-0.0018		581	0.0002		2.52516	0.106122		2.52516	0.777426		2.52516	0.188319
582	0.0071		582	-0.0023		582	0.0001		2.52002	0.124385		2.52002	0.727226		2.52002	0.173135
583	0.0071		583	-0.002		583	-0.0003		2.51491	0.145974		2.51491	0.660628		2.51491	0.156383
584	0.0068		584	-0.0023		584	0.0006		2.50982	0.173857		2.50982	0.604544		2.50982	0.140334
585	0.0059		585	-0.0015		585	0.0006		2.50475	0.20433		2.50475	0.549215		2.50475	0.128848
586	0.0067		586	-0.0019		586	0.0005		2.4997	0.248543		2.4997	0.490198		2.4997	0.115448
587	0.0068		587	-0.0025		587	0.0009		2.49467	0.30219		2.49467	0.432144		2.49467	0.104713
588	0.0059		588	-0.0017		588	0.0001		2.48966	0.359932		2.48966	0.392478		2.48966	0.0970472
589	0.006		589	-0.0032		589	0.0002		2.48467	0.427293		2.48467	0.352014		2.48467	0.0890729
590	0.0069		590	-0.0008		590	-0.0001		2.4797	0.518961		2.4797	0.309914		2.4797	0.0796491
591	0.0062		591	-0.0018		591	-0.0001		2.47475	0.619717		2.47475	0.274187		2.47475	0.0726642
592	0.007		592	-0.002		592	0.0004		2.46982	0.711232		2.46982	0.243358		2.46982	0.0667162
593	0.0069		593	-0.0015		593	0		2.46491	0.810176		2.46491	0.218352		2.46491	0.0605508
594	0.0067		594	-0.0026		594	-0.0004		2.46002	0.899663		2.46002	0.191827		2.46002	0.055417
595	0.0067		595	-0.0023		595	-0.0002		2.45515	0.968308		2.45515	0.167941		2.45515	0.0518108
596	0.0064		596	-0.0027		596	0.0007		2.4503	0.999252		2.4503	0.151322		2.4503	0.045915
597	0.0059		597	-0.0016		597	0		2.44547	1		2.44547	0.136474		2.44547	0.0435785
598	0.0057		598	-0.0021		598	-0.0001		2.44065	0.975255		2.44065	0.12214		2.44065	0.0395704
599	0.007		599	-0.0027		599	0.0001		2.43586	0.927055		2.43586	0.109052		2.43586	0.0373034
600	0.0068		600	-0.0014		600	0		2.43108	0.864383		2.43108	0.0978973		2.43108	0.0332076
601	0.0064		601	-0.0029		601	0.0004		2.42632	0.790464		2.42632	0.0867919		2.42632	0.0309313
602	0.0069		602	-0.002		602	0.0002		2.42159	0.706662		2.42159	0.0766904		2.42159	0.0284751
603	0.0063		603	-0.0027		603	-0.0001		2.41686	0.642725		2.41686	0.0705957		2.41686	0.0262061
604	0.0071		604	-0.0024		604	-0.0002		2.41216	0.582353		2.41216	0.0623436		2.41216	0.0253838
605	0.0062		605	-0.0029		605	0.0008		2.40748	0.511603		2.40748	0.0555509		2.40748	0.0226133
606	0.0067		606	-0.0019		606	0.0001		2.40281	0.463673		2.40281	0.051289		2.40281	0.0218181
607	0.0052		607	-0.003		607	0.0005		2.39817	0.416862		2.39817	0.0468463		2.39817	0.0210602
608	0.0055		608	-0.0021		608	0		2.39354	0.365002		2.39354	0.0418484		2.39354	0.0193223
609	0.0061		609	-0.0009		609	-0.0014		2.38892	0.324338		2.38892	0.0378902		2.38892	0.0177247
610	0.0067		610	-0.0019		610	0.0002		2.38433	0.289066		2.38433	0.0343449		2.38433	0.0161114
611	0.0052		611	-0.0017		611	0.0004		2.37975	0.2546		2.37975	0.0310152		2.37975	0.0154993
612	0.0056		612	-0.0024		612	0.0001		2.37519	0.225922		2.37519	0.0281356		2.37519	0.014105
613	0.0058		613	-0.0015		613	-0.0005		2.37065	0.19693		2.37065	0.0255912		2.37065	0.0139921
614	0.0065		614	-0.0024		614	0.0004		2.36613	0.180117		2.36613	0.0235589		2.36613	0.0127473
615	0.0068		615	-0.002		615	0.0008		2.36162	0.156502		2.36162	0.0212927		2.36162	0.0121256
616	0.0054		616	-0.0014		616	0.0001		2.35713	0.139449		2.35713	0.0198511		2.35713	0.0105407
617	0.0057		617	-0.0012		617	-0.0005		2.35266	0.123507		2.35266	0.0177681		2.35266	0.010533
618	0.0047		618	-0.0022		618	-0.0005		2.3482	0.110255		2.3482	0.0159212		2.3482	0.0106399
619	0.0071		619	-0.0021		619	0.001		2.34376	0.0947186		2.34376	0.0148843		2.34376	0.0101325
620	0.0053		620	-0.0018		620	-0.0001		2.33934	0.0842807		2.33934	0.013684		2.33934	0.00917222
621	0.0061		621	-0.0014		621	-0.0003		2.33494	0.0773491		2.33494	0.0125873		2.33494	0.00859376
622	0.0061		622	-0.002		622	0.0001		2.33055	0.0675297		2.33055	0.0112038		2.33055	0.00826858
623	0.0064		623	-0.0024		623	0.0004		2.32618	0.0591549		2.32618	0.0101286		2.32618	0.00714778
624	0.006		624	-0.0022		624	0.0002		2.32182	0.052807		2.32182	0.00975335		2.32182	0.00740007
625	0.0062		625	-0.0014		625	0.001		2.31748	0.0471849		2.31748	0.00841807		2.31748	0.00665891
626	0.0053		626	-0.0012		626	-0.0001		2.31316	0.0419438		2.31316	0.00818181		2.31316	0.00665474
627	0.0059		627	-0.002		627	0.0011		2.30885	0.0353469		2.30885	0.00721922		2.30885	0.00649588
628	0.0051		628	-0.0014		628	-0.0002		2.30456	0.0329561		2.30456	0.00660898		2.30456	0.00577828
629	0.0055		629	-0.0014		629	0.0001		2.30028	0.0294516		2.30028	0.00672236		2.30028	0.00537777
630	0.0063		630	-0.0023		630	0.0009		2.29602	0.0256654		2.29602	0.0055445		2.29602	0.0057276
631	0.0059		631	-0.0017		631	0.0002		2.29178	0.0229154		2.29178	0.00556788		2.29178	0.00484661
632	0.0063		632	-0.0017		632	0.0004		2.28755	0.0202112		2.28755	0.00491392		2.28755	0.00539247
633	0.005		633	-0.0016		633	0.0007		2.28334	0.0179686		2.28334	0.00515274		2.28334	0.00519913
634	0.0047		634	-0.0031		634	0		2.27914	0.0157512		2.27914	0.00466971		2.27914	0.00483532
635	0.0062		635	-0.0015		635	-0.0002		2.27496	0.0140942		2.27496	0.00377211		2.27496	0.00398267
636	0.0059		636	-0.0023		636	0.0003		2.27079	0.0125572		2.27079	0.00376436		2.27079	0.00425195
637	0.0043		637	-0.001		637	0.0004		2.26664	0.0111023		2.26664	0.00307476		2.26664	0.00392711
638	0.0053		638	-0.0015		638	-0.0006		2.2625	0.0101774		2.2625	0.00326756		2.2625	0.00359354
639	0.0056		639	-0.0014		639	0.0004		2.25838	0.00872627		2.25838	0.00313003		2.25838	0.00365681
640	0.0053		640	-0.0014		640	0.0001		2.25428	0.00807927		2.25428	0.00299688		2.25428	0.00350181
641	0.005		641	-0.0028		641	-0.0003		2.25018	0.00722856		2.25018	0.00261563		2.25018	0.00323487
642	0.0056		642	-0.0021		642	0.0001		2.24611	0.00611995		2.24611	0.00245464		2.24611	0.00328841
643	0.0048		643	-0.0026		643	0.0004		2.24205	0.0056625		2.24205	0.00224531		2.24205	0.00254676
644	0.0056		644	-0.0014		644	0.0005		2.238	0.00495933		2.238	0.00222703		2.238	0.00272679
645	0.0045		645	-0.0006		645	0.0014		2.23397	0.00428858		2.23397	0.00186849		2.23397	0.00298363
646	0.0056		646	-0.0027		646	-0.0002		2.22995	0.00383715		2.22995	0.0017456		2.22995	0.00298231
647	0.0056		647	-0.0018		647	-0.0006		2.22595	0.00329859		2.22595	0.00165091		2.22595	0.00286072
648	0.0054		648	-0.0022		648	0.0005		2.22196	0.00317142		2.22196	0.00158863		2.22196	0.00306965
649	0.0046		649	-0.002		649	0.0002		2.21798	0.00285343		2.21798	0.00144456		2.21798	0.00235192
650	0.0043		650	-0.0024		650	-0.0002		2.21402	0.00248396		2.21402	0.00141423		2.21402	0.00233174
651	0.0048		651	-0.0016		651	-0.0002		2.21007	0.00213496		2.21007	0.00146956		2.21007	0.00237686
652	0.005		652	-0.0019		652	0.0008		2.20614	0.00210845		2.20614	0.00158939		2.20614	0.00207088
653	0.0058		653	-0.0029		653	0.0008		2.20222	0.00199383		2.20222	0.00120305		2.20222	0.00233986
654	0.0051		654	-0.0025		654	0.001		2.19832	0.00160778		2.19832	0.00126749		2.19832	0.00231542
655	0.0047		655	-0.0026		655	-0.0002		2.19443	0.00170753		2.19443	0.00133531		2.19443	0.00230369
656	0.005		656	-0.0006		656	0.0007		2.19055	0.00138374		2.19055	0.00118232		2.19055	0.00180989
657	0.0044		657	-0.0023		657	0.0006		2.18669	0.00134795		2.18669	0.00159948		2.18669	0.00196389
658	0.0042		658	-0.0017		658	0.0001		2.18284	0.00117482		2.18284	0.00127152		2.18284	0.00221434
659	0.0052		659	-0.0008		659	0.0008		2.179	0.00118216		2.179	0.001355		2.179	0.00185707
660	0.0047		660	-0.002		660	0.0006		2.17518	0.00113763		2.17518	0.00105824		2.17518	0.00195696
661	0.0041		661	-0.0022		661	0.001		2.17137	0.000929182		2.17137	0.00112712		2.17137	0.0017274
662	0.005		662	-0.0012		662	0.0005		2.16757	0.000896482		2.16757	0.00113857		2.16757	0.00209506
663	0.005		663	-0.0015		663	0.0006		2.16379	0.000752859		2.16379	0.000995023		2.16379	0.00172074
664	0.0049		664	-0.0016		664	0.0004		2.16002	0.000971505		2.16002	0.0010507		2.16002	0.00157655
665	0.0049		665	-0.002		665	0.0005		2.15626	0.000690014		2.15626	0.000979228		2.15626	0.00144525
666	0.0052		666	-0.0018		666	0.0005		2.15252	0.000635036		2.15252	0.000919653		2.15252	0.00179317
667	0.0058		667	-0.0014		667	0.0003		2.14879	0.000688712		2.14879	0.000824872		2.14879	0.00121054
668	0.0046		668	-0.0013		668	0		2.14507	0.000614921		2.14507	0.000845986		2.14507	0.00134657
669	0.0051		669	-0.0016		669	0.0003		2.14137	0.000435506		2.14137	0.00075252		2.14137	0.00118886
670	0.0048		670	-0.0032		670	-0.0003		2.13768	0.000609324		2.13768	0.000975459		2.13768	0.0017417
671	0.0045		671	-0.0015		671	0.0005		2.134	0.000578945		2.134	0.000695125		2.134	0.00169111
672	0.005		672	-0.0017		672	-0.0003		2.13033	0.00051771		2.13033	0.000826125		2.13033	0.00172621
673	0.0037		673	-0.0025		673	-0.0003		2.12668	0.0005336		2.12668	0.000785896		2.12668	0.00117334
674	0.0043		674	-0.0012		674	0.0001		2.12303	0.000491365		2.12303	0.000973898		2.12303	0.00122262
675	0.0056		675	-0.0011		675	-0.0001		2.1194	0.000397923		2.1194	0.000580722		2.1194	0.00151187
676	0.0052		676	-0.0006		676	-0.0003		2.11579	0.000452468		2.11579	0.000768695		2.11579	0.00128509
677	0.0054		677	-0.0013		677	-0.0012		2.11218	0.00039609		2.11218	0.000857612		2.11218	0.00165558
678	0.005		678	-0.0004		678	-0.0007		2.10859	0.000515233		2.10859	0.000932586		2.10859	0.00137354
679	0.0061		679	-0.0028		679	-0.0005		2.10501	0.00055236		2.10501	0.00081011		2.10501	0.00143063
680	0.004		680	-0.0018		680	-0.0007		2.10144	0.000401313		2.10144	0.000683087		2.10144	0.00121265
681	0.0042		681	-0.0025		681	-0.0003
682	0.0047		682	-0.0002		682	-0.0003
683	0.0055		683	-0.001		683	-0.0004
684	0.0047		684	0.0006		684	0.0002
685	0.0042		685	0.0007		685	-0.0005
686	0.0055		686	-0.0011		686	0.0002
687	0.0043		687	-0.0023		687	0.0001
688	0.0055		688	-0.0021		688	-0.0002
689	0.0045		689	-0.0023		689	-0.0005
690	0.0044		690	-0.0011		690	0.0005
691	0.0043		691	-0.0001		691	0.0009
692	0.0049		692	-0.0027		692	-0.0002
693	0.0045		693	-0.0021		693	-0.0006
694	0.0056		694	-0.0013		694	-0.0007
695	0.0032		695	-0.0022		695	0
696	0.0054		696	-0.0004		696	-0.0001
697	0.0054		697	-0.0028		697	-0.0001
698	0.0046		698	-0.0011		698	-0.0008
699	0.0063		699	0.0007		699	0.0003
700	0.0039		700	-0.0012		700	0.0007

## Sheet: Fig2
Lifetime
Data Set #0						Data Set #0						Data Set #0
Decay IRF Model Decay Residuals						Decay IRF Model Decay Residuals						Decay IRF Model Decay Residuals
t[ns] Intens. t[ns] Intens. t[ns] Intens. t[ns] diff.						t[ns] Intens. t[ns] Intens. t[ns] Intens. t[ns] diff.						t[ns] Intens. t[ns] Intens. t[ns] Intens. t[ns] diff.
0.0000 1 0.2380 1 0.0000 0.000 0.0000 0.000						0.0000 1 0.0923 1 0.0000 0.000 0.0000 0.000						0.0000 1 0.1313 1 0.0000 0.000 0.0000 0.000
0.0160 0 0.2540 0 0.0160 0.000 0.0160 0.000						0.0160 1 0.1083 0 0.0160 0.000 0.0160 0.000						0.0160 0 0.1473 0 0.0160 0.000 0.0160 0.000
0.0320 0 0.2700 0 0.0320 0.000 0.0320 0.000						0.0320 0 0.1243 0 0.0320 0.000 0.0320 0.000						0.0320 0 0.1633 0 0.0320 0.000 0.0320 0.000
0.0480 1 0.2860 0 0.0480 0.000 0.0480 0.000						0.0480 3 0.1403 0 0.0480 0.000 0.0480 0.000						0.0480 2 0.1793 0 0.0480 0.000 0.0480 0.000
0.0640 3 0.3020 0 0.0640 0.000 0.0640 0.000						0.0640 1 0.1563 0 0.0640 0.000 0.0640 0.000						0.0640 0 0.1953 0 0.0640 0.000 0.0640 0.000
0.0800 2 0.3180 0 0.0800 0.000 0.0800 0.000						0.0800 2 0.1723 0 0.0800 0.000 0.0800 0.000						0.0800 1 0.2113 0 0.0800 0.000 0.0800 0.000
0.0960 0 0.3340 0 0.0960 0.000 0.0960 0.000						0.0960 3 0.1883 0 0.0960 0.000 0.0960 0.000						0.0960 2 0.2273 0 0.0960 0.000 0.0960 0.000
0.1120 1 0.3500 0 0.1120 0.000 0.1120 0.000						0.1120 1 0.2043 0 0.1120 0.000 0.1120 0.000						0.1120 0 0.2433 0 0.1120 0.000 0.1120 0.000
0.1280 0 0.3660 0 0.1280 0.000 0.1280 0.000						0.1280 2 0.2203 0 0.1280 0.000 0.1280 0.000						0.1280 1 0.2593 0 0.1280 0.000 0.1280 0.000
0.1440 2 0.3820 0 0.1440 0.000 0.1440 0.000						0.1440 0 0.2363 0 0.1440 0.000 0.1440 0.000						0.1440 1 0.2753 0 0.1440 0.000 0.1440 0.000
0.1600 1 0.3980 1 0.1600 0.000 0.1600 0.000						0.1600 2 0.2523 0 0.1600 0.000 0.1600 0.000						0.1600 1 0.2913 0 0.1600 0.000 0.1600 0.000
0.1760 2 0.4140 0 0.1760 0.000 0.1760 0.000						0.1760 3 0.2683 0 0.1760 0.000 0.1760 0.000						0.1760 0 0.3073 0 0.1760 0.000 0.1760 0.000
0.1920 3 0.4300 0 0.1920 0.000 0.1920 0.000						0.1920 3 0.2843 0 0.1920 0.000 0.1920 0.000						0.1920 2 0.3233 0 0.1920 0.000 0.1920 0.000
0.2080 2 0.4460 0 0.2080 0.000 0.2080 0.000						0.2080 0 0.3003 0 0.2080 0.000 0.2080 0.000						0.2080 0 0.3393 0 0.2080 0.000 0.2080 0.000
0.2240 3 0.4620 0 0.2240 0.000 0.2240 0.000						0.2240 2 0.3163 1 0.2240 0.000 0.2240 0.000						0.2240 1 0.3553 0 0.2240 0.000 0.2240 0.000
0.2400 1 0.4780 0 0.2400 0.000 0.2400 0.000						0.2400 2 0.3323 0 0.2400 0.000 0.2400 0.000						0.2400 0 0.3713 0 0.2400 0.000 0.2400 0.000
0.2560 1 0.4940 0 0.2560 0.000 0.2560 0.000						0.2560 2 0.3483 0 0.2560 0.000 0.2560 0.000						0.2560 2 0.3873 0 0.2560 0.000 0.2560 0.000
0.2720 1 0.5100 0 0.2720 0.000 0.2720 0.000						0.2720 3 0.3643 0 0.2720 0.000 0.2720 0.000						0.2720 0 0.4033 1 0.2720 0.000 0.2720 0.000
0.2880 5 0.5260 0 0.2880 0.000 0.2880 0.000						0.2880 1 0.3803 0 0.2880 0.000 0.2880 0.000						0.2880 0 0.4193 0 0.2880 0.000 0.2880 0.000
0.3040 2 0.5420 1 0.3040 0.000 0.3040 0.000						0.3040 2 0.3963 0 0.3040 0.000 0.3040 0.000						0.3040 0 0.4353 0 0.3040 0.000 0.3040 0.000
0.3200 1 0.5580 0 0.3200 0.000 0.3200 0.000						0.3200 3 0.4123 1 0.3200 0.000 0.3200 0.000						0.3200 2 0.4513 0 0.3200 0.000 0.3200 0.000
0.3360 2 0.5740 0 0.3360 0.000 0.3360 0.000						0.3360 0 0.4283 0 0.3360 0.000 0.3360 0.000						0.3360 3 0.4673 0 0.3360 0.000 0.3360 0.000
0.3520 2 0.5900 0 0.3520 0.000 0.3520 0.000						0.3520 3 0.4443 0 0.3520 0.000 0.3520 0.000						0.3520 2 0.4833 0 0.3520 0.000 0.3520 0.000
0.3680 1 0.6060 0 0.3680 0.000 0.3680 0.000						0.3680 0 0.4603 0 0.3680 0.000 0.3680 0.000						0.3680 5 0.4993 0 0.3680 0.000 0.3680 0.000
0.3840 3 0.6220 0 0.3840 0.000 0.3840 0.000						0.3840 0 0.4763 0 0.3840 0.000 0.3840 0.000						0.3840 1 0.5153 0 0.3840 0.000 0.3840 0.000
0.4000 2 0.6380 0 0.4000 0.000 0.4000 0.000						0.4000 1 0.4923 0 0.4000 0.000 0.4000 0.000						0.4000 3 0.5313 0 0.4000 0.000 0.4000 0.000
0.4160 0 0.6540 0 0.4160 0.000 0.4160 0.000						0.4160 2 0.5083 0 0.4160 0.000 0.4160 0.000						0.4160 2 0.5473 0 0.4160 0.000 0.4160 0.000
0.4320 0 0.6700 0 0.4320 0.000 0.4320 0.000						0.4320 4 0.5243 1 0.4320 0.000 0.4320 0.000						0.4320 1 0.5633 0 0.4320 0.000 0.4320 0.000
0.4480 4 0.6860 0 0.4480 0.000 0.4480 0.000						0.4480 1 0.5403 0 0.4480 0.000 0.4480 0.000						0.4480 1 0.5793 0 0.4480 0.000 0.4480 0.000
0.4640 1 0.7020 0 0.4640 0.000 0.4640 0.000						0.4640 0 0.5563 0 0.4640 0.000 0.4640 0.000						0.4640 3 0.5953 0 0.4640 0.000 0.4640 0.000
0.4800 1 0.7180 1 0.4800 0.000 0.4800 0.000						0.4800 0 0.5723 0 0.4800 0.000 0.4800 0.000						0.4800 0 0.6113 0 0.4800 0.000 0.4800 0.000
0.4960 0 0.7340 0 0.4960 0.000 0.4960 0.000						0.4960 0 0.5883 0 0.4960 0.000 0.4960 0.000						0.4960 0 0.6273 1 0.4960 0.000 0.4960 0.000
0.5120 3 0.7500 0 0.5120 0.000 0.5120 0.000						0.5120 2 0.6043 0 0.5120 0.000 0.5120 0.000						0.5120 0 0.6433 0 0.5120 0.000 0.5120 0.000
0.5280 1 0.7660 0 0.5280 0.000 0.5280 0.000						0.5280 1 0.6203 0 0.5280 0.000 0.5280 0.000						0.5280 3 0.6593 0 0.5280 0.000 0.5280 0.000
0.5440 2 0.7820 0 0.5440 0.000 0.5440 0.000						0.5440 1 0.6363 0 0.5440 0.000 0.5440 0.000						0.5440 2 0.6753 0 0.5440 0.000 0.5440 0.000
0.5600 1 0.7980 0 0.5600 0.000 0.5600 0.000						0.5600 2 0.6523 0 0.5600 0.000 0.5600 0.000						0.5600 1 0.6913 0 0.5600 0.000 0.5600 0.000
0.5760 1 0.8140 0 0.5760 0.000 0.5760 0.000						0.5760 1 0.6683 0 0.5760 0.000 0.5760 0.000						0.5760 3 0.7073 0 0.5760 0.000 0.5760 0.000
0.5920 1 0.8300 0 0.5920 0.000 0.5920 0.000						0.5920 0 0.6843 0 0.5920 0.000 0.5920 0.000						0.5920 4 0.7233 0 0.5920 0.000 0.5920 0.000
0.6080 2 0.8460 0 0.6080 0.000 0.6080 0.000						0.6080 1 0.7003 0 0.6080 0.000 0.6080 0.000						0.6080 1 0.7393 0 0.6080 0.000 0.6080 0.000
0.6240 1 0.8620 0 0.6240 0.000 0.6240 0.000						0.6240 1 0.7163 0 0.6240 0.000 0.6240 0.000						0.6240 1 0.7553 0 0.6240 0.000 0.6240 0.000
0.6400 0 0.8780 0 0.6400 0.000 0.6400 0.000						0.6400 3 0.7323 0 0.6400 0.000 0.6400 0.000						0.6400 3 0.7713 0 0.6400 0.000 0.6400 0.000
0.6560 2 0.8940 0 0.6560 0.000 0.6560 0.000						0.6560 1 0.7483 0 0.6560 0.000 0.6560 0.000						0.6560 1 0.7873 0 0.6560 0.000 0.6560 0.000
0.6720 1 0.9100 0 0.6720 0.000 0.6720 0.000						0.6720 0 0.7643 0 0.6720 0.000 0.6720 0.000						0.6720 3 0.8033 0 0.6720 0.000 0.6720 0.000
0.6880 3 0.9260 0 0.6880 0.000 0.6880 0.000						0.6880 1 0.7803 0 0.6880 0.000 0.6880 0.000						0.6880 2 0.8193 0 0.6880 0.000 0.6880 0.000
0.7040 1 0.9420 0 0.7040 0.000 0.7040 0.000						0.7040 4 0.7963 1 0.7040 0.000 0.7040 0.000						0.7040 0 0.8353 0 0.7040 0.000 0.7040 0.000
0.7200 3 0.9580 0 0.7200 0.000 0.7200 0.000						0.7200 0 0.8123 1 0.7200 0.000 0.7200 0.000						0.7200 2 0.8513 0 0.7200 0.000 0.7200 0.000
0.7360 2 0.9740 0 0.7360 0.000 0.7360 0.000						0.7360 3 0.8283 0 0.7360 0.000 0.7360 0.000						0.7360 0 0.8673 0 0.7360 0.000 0.7360 0.000
0.7520 1 0.9900 0 0.7520 0.000 0.7520 0.000						0.7520 1 0.8443 0 0.7520 0.000 0.7520 0.000						0.7520 2 0.8833 0 0.7520 0.000 0.7520 0.000
0.7680 0 1.0060 0 0.7680 0.000 0.7680 0.000						0.7680 0 0.8603 0 0.7680 0.000 0.7680 0.000						0.7680 2 0.8993 0 0.7680 0.000 0.7680 0.000
0.7840 0 1.0220 0 0.7840 0.000 0.7840 0.000						0.7840 1 0.8763 0 0.7840 0.000 0.7840 0.000						0.7840 1 0.9153 0 0.7840 0.000 0.7840 0.000
0.8000 1 1.0380 0 0.8000 0.000 0.8000 0.000						0.8000 2 0.8923 0 0.8000 0.000 0.8000 0.000						0.8000 3 0.9313 0 0.8000 0.000 0.8000 0.000
0.8160 0 1.0540 0 0.8160 0.000 0.8160 0.000						0.8160 1 0.9083 0 0.8160 0.000 0.8160 0.000						0.8160 2 0.9473 0 0.8160 0.000 0.8160 0.000
0.8320 0 1.0700 0 0.8320 0.000 0.8320 0.000						0.8320 1 0.9243 0 0.8320 0.000 0.8320 0.000						0.8320 3 0.9633 0 0.8320 0.000 0.8320 0.000
0.8480 0 1.0860 0 0.8480 0.000 0.8480 0.000						0.8480 0 0.9403 0 0.8480 0.000 0.8480 0.000						0.8480 4 0.9793 0 0.8480 0.000 0.8480 0.000
0.8640 1 1.1020 0 0.8640 0.000 0.8640 0.000						0.8640 1 0.9563 0 0.8640 0.000 0.8640 0.000						0.8640 4 0.9953 0 0.8640 0.000 0.8640 0.000
0.8800 1 1.1180 0 0.8800 0.000 0.8800 0.000						0.8800 2 0.9723 0 0.8800 0.000 0.8800 0.000						0.8800 1 1.0113 0 0.8800 0.000 0.8800 0.000
0.8960 3 1.1340 0 0.8960 0.000 0.8960 0.000						0.8960 2 0.9883 0 0.8960 0.000 0.8960 0.000						0.8960 2 1.0273 0 0.8960 0.000 0.8960 0.000
0.9120 1 1.1500 0 0.9120 0.000 0.9120 0.000						0.9120 2 1.0043 0 0.9120 0.000 0.9120 0.000						0.9120 0 1.0433 0 0.9120 0.000 0.9120 0.000
0.9280 1 1.1660 0 0.9280 0.000 0.9280 0.000						0.9280 3 1.0203 0 0.9280 0.000 0.9280 0.000						0.9280 2 1.0593 0 0.9280 0.000 0.9280 0.000
0.9440 0 1.1820 0 0.9440 0.000 0.9440 0.000						0.9440 2 1.0363 0 0.9440 0.000 0.9440 0.000						0.9440 3 1.0753 0 0.9440 0.000 0.9440 0.000
0.9600 3 1.1980 0 0.9600 0.000 0.9600 0.000						0.9600 3 1.0523 0 0.9600 0.000 0.9600 0.000						0.9600 0 1.0913 0 0.9600 0.000 0.9600 0.000
0.9760 0 1.2140 0 0.9760 0.000 0.9760 0.000						0.9760 4 1.0683 0 0.9760 0.000 0.9760 0.000						0.9760 1 1.1073 0 0.9760 0.000 0.9760 0.000
0.9920 1 1.2300 0 0.9920 0.000 0.9920 0.000						0.9920 1 1.0843 0 0.9920 0.000 0.9920 0.000						0.9920 1 1.1233 0 0.9920 0.000 0.9920 0.000
1.0080 1 1.2460 0 1.0080 0.000 1.0080 0.000						1.0080 2 1.1003 0 1.0080 0.000 1.0080 0.000						1.0080 1 1.1393 0 1.0080 0.000 1.0080 0.000
1.0240 2 1.2620 0 1.0240 0.000 1.0240 0.000						1.0240 1 1.1163 0 1.0240 0.000 1.0240 0.000						1.0240 1 1.1553 0 1.0240 0.000 1.0240 0.000
1.0400 1 1.2780 0 1.0400 0.000 1.0400 0.000						1.0400 0 1.1323 0 1.0400 0.000 1.0400 0.000						1.0400 1 1.1713 0 1.0400 0.000 1.0400 0.000
1.0560 1 1.2940 0 1.0560 0.000 1.0560 0.000						1.0560 2 1.1483 0 1.0560 0.000 1.0560 0.000						1.0560 7 1.1873 0 1.0560 0.000 1.0560 0.000
1.0720 1 1.3100 0 1.0720 0.000 1.0720 0.000						1.0720 3 1.1643 0 1.0720 0.000 1.0720 0.000						1.0720 1 1.2033 0 1.0720 0.000 1.0720 0.000
1.0880 3 1.3260 0 1.0880 0.000 1.0880 0.000						1.0880 1 1.1803 0 1.0880 0.000 1.0880 0.000						1.0880 0 1.2193 0 1.0880 0.000 1.0880 0.000
1.1040 3 1.3420 0 1.1040 0.000 1.1040 0.000						1.1040 1 1.1963 1 1.1040 0.000 1.1040 0.000						1.1040 2 1.2353 0 1.1040 0.000 1.1040 0.000
1.1200 2 1.3580 0 1.1200 0.000 1.1200 0.000						1.1200 1 1.2123 0 1.1200 0.000 1.1200 0.000						1.1200 1 1.2513 0 1.1200 0.000 1.1200 0.000
1.1360 1 1.3740 0 1.1360 0.000 1.1360 0.000						1.1360 2 1.2283 1 1.1360 0.000 1.1360 0.000						1.1360 1 1.2673 0 1.1360 0.000 1.1360 0.000
1.1520 0 1.3900 0 1.1520 0.000 1.1520 0.000						1.1520 2 1.2443 1 1.1520 0.000 1.1520 0.000						1.1520 2 1.2833 0 1.1520 0.000 1.1520 0.000
1.1680 1 1.4060 0 1.1680 0.000 1.1680 0.000						1.1680 1 1.2603 0 1.1680 0.000 1.1680 0.000						1.1680 3 1.2993 0 1.1680 0.000 1.1680 0.000
1.1840 1 1.4220 0 1.1840 0.000 1.1840 0.000						1.1840 1 1.2763 0 1.1840 0.000 1.1840 0.000						1.1840 2 1.3153 0 1.1840 0.000 1.1840 0.000
1.2000 2 1.4380 0 1.2000 0.000 1.2000 0.000						1.2000 1 1.2923 0 1.2000 0.000 1.2000 0.000						1.2000 1 1.3313 0 1.2000 0.000 1.2000 0.000
1.2160 1 1.4540 1 1.2160 0.000 1.2160 0.000						1.2160 2 1.3083 0 1.2160 0.000 1.2160 0.000						1.2160 1 1.3473 0 1.2160 0.000 1.2160 0.000
1.2320 0 1.4700 1 1.2320 0.000 1.2320 0.000						1.2320 0 1.3243 0 1.2320 0.000 1.2320 0.000						1.2320 4 1.3633 0 1.2320 0.000 1.2320 0.000
1.2480 3 1.4860 0 1.2480 0.000 1.2480 0.000						1.2480 2 1.3403 0 1.2480 0.000 1.2480 0.000						1.2480 1 1.3793 0 1.2480 0.000 1.2480 0.000
1.2640 0 1.5020 0 1.2640 0.000 1.2640 0.000						1.2640 3 1.3563 0 1.2640 0.000 1.2640 0.000						1.2640 1 1.3953 0 1.2640 0.000 1.2640 0.000
1.2800 2 1.5180 0 1.2800 0.000 1.2800 0.000						1.2800 0 1.3723 0 1.2800 0.000 1.2800 0.000						1.2800 1 1.4113 0 1.2800 0.000 1.2800 0.000
1.2960 1 1.5340 0 1.2960 0.000 1.2960 0.000						1.2960 2 1.3883 0 1.2960 0.000 1.2960 0.000						1.2960 1 1.4273 0 1.2960 0.000 1.2960 0.000
1.3120 2 1.5500 0 1.3120 0.000 1.3120 0.000						1.3120 2 1.4043 0 1.3120 0.000 1.3120 0.000						1.3120 6 1.4433 0 1.3120 0.000 1.3120 0.000
1.3280 1 1.5660 0 1.3280 0.000 1.3280 0.000						1.3280 2 1.4203 1 1.3280 0.000 1.3280 0.000						1.3280 0 1.4593 0 1.3280 0.000 1.3280 0.000
1.3440 0 1.5820 0 1.3440 0.000 1.3440 0.000						1.3440 2 1.4363 0 1.3440 0.000 1.3440 0.000						1.3440 0 1.4753 0 1.3440 0.000 1.3440 0.000
1.3600 0 1.5980 0 1.3600 0.000 1.3600 0.000						1.3600 1 1.4523 0 1.3600 0.000 1.3600 0.000						1.3600 4 1.4913 0 1.3600 0.000 1.3600 0.000
1.3760 1 1.6140 0 1.3760 0.000 1.3760 0.000						1.3760 3 1.4683 0 1.3760 0.000 1.3760 0.000						1.3760 1 1.5073 0 1.3760 0.000 1.3760 0.000
1.3920 0 1.6300 0 1.3920 0.000 1.3920 0.000						1.3920 2 1.4843 0 1.3920 0.000 1.3920 0.000						1.3920 1 1.5233 0 1.3920 0.000 1.3920 0.000
1.4080 1 1.6460 1 1.4080 0.000 1.4080 0.000						1.4080 1 1.5003 0 1.4080 0.000 1.4080 0.000						1.4080 0 1.5393 0 1.4080 0.000 1.4080 0.000
1.4240 0 1.6620 0 1.4240 0.000 1.4240 0.000						1.4240 3 1.5163 0 1.4240 0.000 1.4240 0.000						1.4240 2 1.5553 0 1.4240 0.000 1.4240 0.000
1.4400 1 1.6780 0 1.4400 0.000 1.4400 0.000						1.4400 2 1.5323 1 1.4400 0.000 1.4400 0.000						1.4400 1 1.5713 0 1.4400 0.000 1.4400 0.000
1.4560 1 1.6940 0 1.4560 0.000 1.4560 0.000						1.4560 0 1.5483 0 1.4560 0.000 1.4560 0.000						1.4560 1 1.5873 0 1.4560 0.000 1.4560 0.000
1.4720 2 1.7100 0 1.4720 0.000 1.4720 0.000						1.4720 2 1.5643 0 1.4720 0.000 1.4720 0.000						1.4720 4 1.6033 0 1.4720 0.000 1.4720 0.000
1.4880 1 1.7260 0 1.4880 0.000 1.4880 0.000						1.4880 3 1.5803 0 1.4880 0.000 1.4880 0.000						1.4880 1 1.6193 0 1.4880 0.000 1.4880 0.000
1.5040 1 1.7420 0 1.5040 0.000 1.5040 0.000						1.5040 1 1.5963 0 1.5040 0.000 1.5040 0.000						1.5040 0 1.6353 0 1.5040 0.000 1.5040 0.000
1.5200 1 1.7580 0 1.5200 0.000 1.5200 0.000						1.5200 1 1.6123 0 1.5200 0.000 1.5200 0.000						1.5200 1 1.6513 0 1.5200 0.000 1.5200 0.000
1.5360 0 1.7740 0 1.5360 0.000 1.5360 0.000						1.5360 5 1.6283 0 1.5360 0.000 1.5360 0.000						1.5360 0 1.6673 0 1.5360 0.000 1.5360 0.000
1.5520 1 1.7900 0 1.5520 0.000 1.5520 0.000						1.5520 1 1.6443 0 1.5520 0.000 1.5520 0.000						1.5520 3 1.6833 0 1.5520 0.000 1.5520 0.000
1.5680 2 1.8060 0 1.5680 0.000 1.5680 0.000						1.5680 1 1.6603 0 1.5680 0.000 1.5680 0.000						1.5680 1 1.6993 0 1.5680 0.000 1.5680 0.000
1.5840 1 1.8220 0 1.5840 0.000 1.5840 0.000						1.5840 5 1.6763 0 1.5840 0.000 1.5840 0.000						1.5840 1 1.7153 0 1.5840 0.000 1.5840 0.000
1.6000 2 1.8380 1 1.6000 0.000 1.6000 0.000						1.6000 1 1.6923 0 1.6000 0.000 1.6000 0.000						1.6000 3 1.7313 0 1.6000 0.000 1.6000 0.000
1.6160 2 1.8540 0 1.6160 0.000 1.6160 0.000						1.6160 0 1.7083 0 1.6160 0.000 1.6160 0.000						1.6160 2 1.7473 0 1.6160 0.000 1.6160 0.000
1.6320 3 1.8700 0 1.6320 0.000 1.6320 0.000						1.6320 3 1.7243 0 1.6320 0.000 1.6320 0.000						1.6320 1 1.7633 0 1.6320 0.000 1.6320 0.000
1.6480 2 1.8860 0 1.6480 0.000 1.6480 0.000						1.6480 1 1.7403 0 1.6480 0.000 1.6480 0.000						1.6480 2 1.7793 1 1.6480 0.000 1.6480 0.000
1.6640 0 1.9020 0 1.6640 0.000 1.6640 0.000						1.6640 0 1.7563 0 1.6640 0.000 1.6640 0.000						1.6640 1 1.7953 0 1.6640 0.000 1.6640 0.000
1.6800 1 1.9180 0 1.6800 0.000 1.6800 0.000						1.6800 0 1.7723 0 1.6800 0.000 1.6800 0.000						1.6800 1 1.8113 0 1.6800 0.000 1.6800 0.000
1.6960 0 1.9340 0 1.6960 0.000 1.6960 0.000						1.6960 2 1.7883 0 1.6960 0.000 1.6960 0.000						1.6960 1 1.8273 0 1.6960 0.000 1.6960 0.000
1.7120 1 1.9500 0 1.7120 0.000 1.7120 0.000						1.7120 3 1.8043 0 1.7120 0.000 1.7120 0.000						1.7120 3 1.8433 0 1.7120 0.000 1.7120 0.000
1.7280 1 1.9660 0 1.7280 0.000 1.7280 0.000						1.7280 3 1.8203 0 1.7280 0.000 1.7280 0.000						1.7280 2 1.8593 0 1.7280 0.000 1.7280 0.000
1.7440 3 1.9820 0 1.7440 0.000 1.7440 0.000						1.7440 2 1.8363 0 1.7440 0.000 1.7440 0.000						1.7440 0 1.8753 0 1.7440 0.000 1.7440 0.000
1.7600 0 1.9980 0 1.7600 0.000 1.7600 0.000						1.7600 1 1.8523 0 1.7600 0.000 1.7600 0.000						1.7600 1 1.8913 0 1.7600 0.000 1.7600 0.000
1.7760 2 2.0140 0 1.7760 0.000 1.7760 0.000						1.7760 0 1.8683 0 1.7760 0.000 1.7760 0.000						1.7760 1 1.9073 0 1.7760 0.000 1.7760 0.000
1.7920 1 2.0300 0 1.7920 0.000 1.7920 0.000						1.7920 1 1.8843 0 1.7920 0.000 1.7920 0.000						1.7920 0 1.9233 0 1.7920 0.000 1.7920 0.000
1.8080 3 2.0460 0 1.8080 0.000 1.8080 0.000						1.8080 1 1.9003 0 1.8080 0.000 1.8080 0.000						1.8080 6 1.9393 0 1.8080 0.000 1.8080 0.000
1.8240 2 2.0620 0 1.8240 0.000 1.8240 0.000						1.8240 2 1.9163 0 1.8240 0.000 1.8240 0.000						1.8240 1 1.9553 0 1.8240 0.000 1.8240 0.000
1.8400 2 2.0780 0 1.8400 0.000 1.8400 0.000						1.8400 2 1.9323 0 1.8400 0.000 1.8400 0.000						1.8400 1 1.9713 0 1.8400 0.000 1.8400 0.000
1.8560 2 2.0940 0 1.8560 0.000 1.8560 0.000						1.8560 1 1.9483 0 1.8560 0.000 1.8560 0.000						1.8560 0 1.9873 0 1.8560 0.000 1.8560 0.000
1.8720 4 2.1100 0 1.8720 0.000 1.8720 0.000						1.8720 1 1.9643 0 1.8720 0.000 1.8720 0.000						1.8720 2 2.0033 0 1.8720 0.000 1.8720 0.000
1.8880 1 2.1260 0 1.8880 0.000 1.8880 0.000						1.8880 2 1.9803 0 1.8880 0.000 1.8880 0.000						1.8880 2 2.0193 0 1.8880 0.000 1.8880 0.000
1.9040 3 2.1420 0 1.9040 0.000 1.9040 0.000						1.9040 0 1.9963 0 1.9040 0.000 1.9040 0.000						1.9040 1 2.0353 0 1.9040 0.000 1.9040 0.000
1.9200 2 2.1580 0 1.9200 0.000 1.9200 0.000						1.9200 0 2.0123 0 1.9200 0.000 1.9200 0.000						1.9200 3 2.0513 0 1.9200 0.000 1.9200 0.000
1.9360 1 2.1740 0 1.9360 0.000 1.9360 0.000						1.9360 1 2.0283 0 1.9360 0.000 1.9360 0.000						1.9360 3 2.0673 1 1.9360 0.000 1.9360 0.000
1.9520 2 2.1900 1 1.9520 0.000 1.9520 0.000						1.9520 1 2.0443 0 1.9520 0.000 1.9520 0.000						1.9520 0 2.0833 0 1.9520 0.000 1.9520 0.000
1.9680 2 2.2060 1 1.9680 0.000 1.9680 0.000						1.9680 1 2.0603 0 1.9680 0.000 1.9680 0.000						1.9680 3 2.0993 0 1.9680 0.000 1.9680 0.000
1.9840 2 2.2220 0 1.9840 0.000 1.9840 0.000						1.9840 1 2.0763 0 1.9840 0.000 1.9840 0.000						1.9840 2 2.1153 0 1.9840 0.000 1.9840 0.000
2.0000 3 2.2380 0 2.0000 0.000 2.0000 0.000						2.0000 1 2.0923 1 2.0000 0.000 2.0000 0.000						2.0000 2 2.1313 0 2.0000 0.000 2.0000 0.000
2.0160 0 2.2540 0 2.0160 0.000 2.0160 0.000						2.0160 0 2.1083 0 2.0160 0.000 2.0160 0.000						2.0160 1 2.1473 0 2.0160 0.000 2.0160 0.000
2.0320 1 2.2700 0 2.0320 0.000 2.0320 0.000						2.0320 0 2.1243 0 2.0320 0.000 2.0320 0.000						2.0320 2 2.1633 0 2.0320 0.000 2.0320 0.000
2.0480 3 2.2860 0 2.0480 0.000 2.0480 0.000						2.0480 0 2.1403 0 2.0480 0.000 2.0480 0.000						2.0480 4 2.1793 0 2.0480 0.000 2.0480 0.000
2.0640 2 2.3020 0 2.0640 0.000 2.0640 0.000						2.0640 1 2.1563 0 2.0640 0.000 2.0640 0.000						2.0640 5 2.1953 0 2.0640 0.000 2.0640 0.000
2.0800 3 2.3180 0 2.0800 0.000 2.0800 0.000						2.0800 1 2.1723 0 2.0800 0.000 2.0800 0.000						2.0800 2 2.2113 0 2.0800 0.000 2.0800 0.000
2.0960 0 2.3340 0 2.0960 0.000 2.0960 0.000						2.0960 1 2.1883 0 2.0960 0.000 2.0960 0.000						2.0960 2 2.2273 0 2.0960 0.000 2.0960 0.000
2.1120 0 2.3500 0 2.1120 0.000 2.1120 0.000						2.1120 0 2.2043 0 2.1120 0.000 2.1120 0.000						2.1120 4 2.2433 0 2.1120 0.000 2.1120 0.000
2.1280 0 2.3660 0 2.1280 0.000 2.1280 0.000						2.1280 5 2.2203 0 2.1280 0.000 2.1280 0.000						2.1280 2 2.2593 0 2.1280 0.000 2.1280 0.000
2.1440 1 2.3820 0 2.1440 0.000 2.1440 0.000						2.1440 2 2.2363 0 2.1440 0.000 2.1440 0.000						2.1440 0 2.2753 0 2.1440 0.000 2.1440 0.000
2.1600 0 2.3980 0 2.1600 0.000 2.1600 0.000						2.1600 0 2.2523 0 2.1600 0.000 2.1600 0.000						2.1600 2 2.2913 0 2.1600 0.000 2.1600 0.000
2.1760 2 2.4140 0 2.1760 0.000 2.1760 0.000						2.1760 2 2.2683 0 2.1760 0.000 2.1760 0.000						2.1760 4 2.3073 0 2.1760 0.000 2.1760 0.000
2.1920 2 2.4300 0 2.1920 0.000 2.1920 0.000						2.1920 1 2.2843 0 2.1920 0.000 2.1920 0.000						2.1920 6 2.3233 0 2.1920 0.000 2.1920 0.000
2.2080 2 2.4460 0 2.2080 0.000 2.2080 0.000						2.2080 1 2.3003 0 2.2080 0.000 2.2080 0.000						2.2080 4 2.3393 0 2.2080 0.000 2.2080 0.000
2.2240 3 2.4620 0 2.2240 0.000 2.2240 0.000						2.2240 1 2.3163 0 2.2240 0.000 2.2240 0.000						2.2240 3 2.3553 0 2.2240 0.000 2.2240 0.000
2.2400 2 2.4780 0 2.2400 0.000 2.2400 0.000						2.2400 2 2.3323 0 2.2400 0.000 2.2400 0.000						2.2400 1 2.3713 0 2.2400 0.000 2.2400 0.000
2.2560 2 2.4940 0 2.2560 0.000 2.2560 0.000						2.2560 3 2.3483 0 2.2560 0.000 2.2560 0.000						2.2560 1 2.3873 0 2.2560 0.000 2.2560 0.000
2.2720 0 2.5100 1 2.2720 0.000 2.2720 0.000						2.2720 2 2.3643 0 2.2720 0.000 2.2720 0.000						2.2720 0 2.4033 0 2.2720 0.000 2.2720 0.000
2.2880 2 2.5260 0 2.2880 0.000 2.2880 0.000						2.2880 2 2.3803 0 2.2880 0.000 2.2880 0.000						2.2880 1 2.4193 0 2.2880 0.000 2.2880 0.000
2.3040 2 2.5420 0 2.3040 0.000 2.3040 0.000						2.3040 2 2.3963 0 2.3040 0.000 2.3040 0.000						2.3040 1 2.4353 0 2.3040 0.000 2.3040 0.000
2.3200 1 2.5580 0 2.3200 0.000 2.3200 0.000						2.3200 1 2.4123 0 2.3200 0.000 2.3200 0.000						2.3200 1 2.4513 0 2.3200 0.000 2.3200 0.000
2.3360 0 2.5740 0 2.3360 0.000 2.3360 0.000						2.3360 3 2.4283 0 2.3360 0.000 2.3360 0.000						2.3360 2 2.4673 0 2.3360 0.000 2.3360 0.000
2.3520 0 2.5900 1 2.3520 0.000 2.3520 0.000						2.3520 0 2.4443 0 2.3520 0.000 2.3520 0.000						2.3520 1 2.4833 0 2.3520 0.000 2.3520 0.000
2.3680 2 2.6060 0 2.3680 0.000 2.3680 0.000						2.3680 2 2.4603 1 2.3680 0.000 2.3680 0.000						2.3680 4 2.4993 0 2.3680 0.000 2.3680 0.000
2.3840 2 2.6220 0 2.3840 0.000 2.3840 0.000						2.3840 2 2.4763 0 2.3840 0.000 2.3840 0.000						2.3840 2 2.5153 0 2.3840 0.000 2.3840 0.000
2.4000 1 2.6380 0 2.4000 0.000 2.4000 0.000						2.4000 0 2.4923 0 2.4000 0.000 2.4000 0.000						2.4000 1 2.5313 0 2.4000 0.000 2.4000 0.000
2.4160 0 2.6540 0 2.4160 0.000 2.4160 0.000						2.4160 1 2.5083 0 2.4160 0.000 2.4160 0.000						2.4160 1 2.5473 0 2.4160 0.000 2.4160 0.000
2.4320 1 2.6700 0 2.4320 0.000 2.4320 0.000						2.4320 0 2.5243 0 2.4320 0.000 2.4320 0.000						2.4320 2 2.5633 0 2.4320 0.000 2.4320 0.000
2.4480 2 2.6860 0 2.4480 0.000 2.4480 0.000						2.4480 1 2.5403 0 2.4480 0.000 2.4480 0.000						2.4480 5 2.5793 0 2.4480 0.000 2.4480 0.000
2.4640 3 2.7020 0 2.4640 0.000 2.4640 0.000						2.4640 2 2.5563 0 2.4640 0.000 2.4640 0.000						2.4640 4 2.5953 0 2.4640 0.000 2.4640 0.000
2.4800 1 2.7180 0 2.4800 0.000 2.4800 0.000						2.4800 2 2.5723 0 2.4800 0.000 2.4800 0.000						2.4800 1 2.6113 0 2.4800 0.000 2.4800 0.000
2.4960 0 2.7340 0 2.4960 0.000 2.4960 0.000						2.4960 1 2.5883 0 2.4960 0.000 2.4960 0.000						2.4960 1 2.6273 0 2.4960 0.000 2.4960 0.000
2.5120 0 2.7500 0 2.5120 0.000 2.5120 0.000						2.5120 3 2.6043 0 2.5120 0.000 2.5120 0.000						2.5120 3 2.6433 0 2.5120 0.000 2.5120 0.000
2.5280 1 2.7660 0 2.5280 0.000 2.5280 0.000						2.5280 0 2.6203 0 2.5280 0.000 2.5280 0.000						2.5280 1 2.6593 0 2.5280 0.000 2.5280 0.000
2.5440 1 2.7820 0 2.5440 0.000 2.5440 0.000						2.5440 1 2.6363 0 2.5440 0.000 2.5440 0.000						2.5440 0 2.6753 0 2.5440 0.000 2.5440 0.000
2.5600 3 2.7980 0 2.5600 0.000 2.5600 0.000						2.5600 3 2.6523 0 2.5600 0.000 2.5600 0.000						2.5600 0 2.6913 0 2.5600 0.000 2.5600 0.000
2.5760 2 2.8140 0 2.5760 0.000 2.5760 0.000						2.5760 1 2.6683 0 2.5760 0.000 2.5760 0.000						2.5760 2 2.7073 0 2.5760 0.000 2.5760 0.000
2.5920 2 2.8300 0 2.5920 0.000 2.5920 0.000						2.5920 1 2.6843 0 2.5920 0.000 2.5920 0.000						2.5920 2 2.7233 0 2.5920 0.000 2.5920 0.000
2.6080 2 2.8460 0 2.6080 0.000 2.6080 0.000						2.6080 1 2.7003 0 2.6080 0.000 2.6080 0.000						2.6080 0 2.7393 0 2.6080 0.000 2.6080 0.000
2.6240 0 2.8620 0 2.6240 0.000 2.6240 0.000						2.6240 5 2.7163 0 2.6240 0.000 2.6240 0.000						2.6240 2 2.7553 0 2.6240 0.000 2.6240 0.000
2.6400 0 2.8780 0 2.6400 0.000 2.6400 0.000						2.6400 1 2.7323 0 2.6400 0.000 2.6400 0.000						2.6400 2 2.7713 0 2.6400 0.000 2.6400 0.000
2.6560 1 2.8940 0 2.6560 0.000 2.6560 0.000						2.6560 2 2.7483 0 2.6560 0.000 2.6560 0.000						2.6560 1 2.7873 0 2.6560 0.000 2.6560 0.000
2.6720 3 2.9100 0 2.6720 0.000 2.6720 0.000						2.6720 2 2.7643 0 2.6720 0.000 2.6720 0.000						2.6720 3 2.8033 0 2.6720 0.000 2.6720 0.000
2.6880 1 2.9260 0 2.6880 0.000 2.6880 0.000						2.6880 2 2.7803 0 2.6880 0.000 2.6880 0.000						2.6880 4 2.8193 0 2.6880 0.000 2.6880 0.000
2.7040 0 2.9420 0 2.7040 0.000 2.7040 0.000						2.7040 2 2.7963 0 2.7040 0.000 2.7040 0.000						2.7040 1 2.8353 0 2.7040 0.000 2.7040 0.000
2.7200 2 2.9580 0 2.7200 0.000 2.7200 0.000						2.7200 0 2.8123 0 2.7200 0.000 2.7200 0.000						2.7200 2 2.8513 0 2.7200 0.000 2.7200 0.000
2.7360 0 2.9740 0 2.7360 0.000 2.7360 0.000						2.7360 1 2.8283 0 2.7360 0.000 2.7360 0.000						2.7360 1 2.8673 0 2.7360 0.000 2.7360 0.000
2.7520 0 2.9900 0 2.7520 0.000 2.7520 0.000						2.7520 6 2.8443 0 2.7520 0.000 2.7520 0.000						2.7520 0 2.8833 0 2.7520 0.000 2.7520 0.000
2.7680 2 3.0060 0 2.7680 0.000 2.7680 0.000						2.7680 1 2.8603 0 2.7680 0.000 2.7680 0.000						2.7680 0 2.8993 0 2.7680 0.000 2.7680 0.000
2.7840 2 3.0220 0 2.7840 0.000 2.7840 0.000						2.7840 2 2.8763 0 2.7840 0.000 2.7840 0.000						2.7840 2 2.9153 0 2.7840 0.000 2.7840 0.000
2.8000 4 3.0380 0 2.8000 0.000 2.8000 0.000						2.8000 0 2.8923 0 2.8000 0.000 2.8000 0.000						2.8000 1 2.9313 0 2.8000 0.000 2.8000 0.000
2.8160 2 3.0540 0 2.8160 0.000 2.8160 0.000						2.8160 1 2.9083 0 2.8160 0.000 2.8160 0.000						2.8160 1 2.9473 0 2.8160 0.000 2.8160 0.000
2.8320 0 3.0700 0 2.8320 0.000 2.8320 0.000						2.8320 1 2.9243 0 2.8320 0.000 2.8320 0.000						2.8320 3 2.9633 0 2.8320 0.000 2.8320 0.000
2.8480 1 3.0860 0 2.8480 0.000 2.8480 0.000						2.8480 0 2.9403 1 2.8480 0.000 2.8480 0.000						2.8480 2 2.9793 0 2.8480 0.000 2.8480 0.000
2.8640 1 3.1020 0 2.8640 0.000 2.8640 0.000						2.8640 3 2.9563 0 2.8640 0.000 2.8640 0.000						2.8640 2 2.9953 0 2.8640 0.000 2.8640 0.000
2.8800 1 3.1180 0 2.8800 0.000 2.8800 0.000						2.8800 2 2.9723 0 2.8800 0.000 2.8800 0.000						2.8800 1 3.0113 0 2.8800 0.000 2.8800 0.000
2.8960 3 3.1340 0 2.8960 0.000 2.8960 0.000						2.8960 0 2.9883 0 2.8960 0.000 2.8960 0.000						2.8960 0 3.0273 0 2.8960 0.000 2.8960 0.000
2.9120 3 3.1500 0 2.9120 0.000 2.9120 0.000						2.9120 1 3.0043 0 2.9120 0.000 2.9120 0.000						2.9120 0 3.0433 0 2.9120 0.000 2.9120 0.000
2.9280 4 3.1660 0 2.9280 0.000 2.9280 0.000						2.9280 3 3.0203 0 2.9280 0.000 2.9280 0.000						2.9280 1 3.0593 0 2.9280 0.000 2.9280 0.000
2.9440 2 3.1820 0 2.9440 0.000 2.9440 0.000						2.9440 0 3.0363 0 2.9440 0.000 2.9440 0.000						2.9440 0 3.0753 1 2.9440 0.000 2.9440 0.000
2.9600 1 3.1980 0 2.9600 0.000 2.9600 0.000						2.9600 0 3.0523 0 2.9600 0.000 2.9600 0.000						2.9600 5 3.0913 0 2.9600 0.000 2.9600 0.000
2.9760 0 3.2140 0 2.9760 0.000 2.9760 0.000						2.9760 3 3.0683 0 2.9760 0.000 2.9760 0.000						2.9760 2 3.1073 0 2.9760 0.000 2.9760 0.000
2.9920 3 3.2300 0 2.9920 0.000 2.9920 0.000						2.9920 0 3.0843 0 2.9920 0.000 2.9920 0.000						2.9920 2 3.1233 0 2.9920 0.000 2.9920 0.000
3.0080 3 3.2460 0 3.0080 0.000 3.0080 0.000						3.0080 1 3.1003 0 3.0080 0.000 3.0080 0.000						3.0080 2 3.1393 0 3.0080 0.000 3.0080 0.000
3.0240 4 3.2620 0 3.0240 0.000 3.0240 0.000						3.0240 2 3.1163 0 3.0240 0.000 3.0240 0.000						3.0240 0 3.1553 0 3.0240 0.000 3.0240 0.000
3.0400 2 3.2780 0 3.0400 0.000 3.0400 0.000						3.0400 1 3.1323 0 3.0400 0.000 3.0400 0.000						3.0400 0 3.1713 0 3.0400 0.000 3.0400 0.000
3.0560 0 3.2940 0 3.0560 0.000 3.0560 0.000						3.0560 3 3.1483 0 3.0560 0.000 3.0560 0.000						3.0560 1 3.1873 0 3.0560 0.000 3.0560 0.000
3.0720 1 3.3100 0 3.0720 0.000 3.0720 0.000						3.0720 2 3.1643 0 3.0720 0.000 3.0720 0.000						3.0720 1 3.2033 0 3.0720 0.000 3.0720 0.000
3.0880 3 3.3260 0 3.0880 0.000 3.0880 0.000						3.0880 3 3.1803 0 3.0880 0.000 3.0880 0.000						3.0880 3 3.2193 0 3.0880 0.000 3.0880 0.000
3.1040 0 3.3420 0 3.1040 0.000 3.1040 0.000						3.1040 1 3.1963 0 3.1040 0.000 3.1040 0.000						3.1040 1 3.2353 0 3.1040 0.000 3.1040 0.000
3.1200 1 3.3580 0 3.1200 0.000 3.1200 0.000						3.1200 1 3.2123 1 3.1200 0.000 3.1200 0.000						3.1200 1 3.2513 0 3.1200 0.000 3.1200 0.000
3.1360 3 3.3740 0 3.1360 0.000 3.1360 0.000						3.1360 0 3.2283 0 3.1360 0.000 3.1360 0.000						3.1360 4 3.2673 0 3.1360 0.000 3.1360 0.000
3.1520 0 3.3900 0 3.1520 0.000 3.1520 0.000						3.1520 1 3.2443 0 3.1520 0.000 3.1520 0.000						3.1520 3 3.2833 0 3.1520 0.000 3.1520 0.000
3.1680 2 3.4060 0 3.1680 0.000 3.1680 0.000						3.1680 0 3.2603 0 3.1680 0.000 3.1680 0.000						3.1680 2 3.2993 0 3.1680 0.000 3.1680 0.000
3.1840 2 3.4220 0 3.1840 0.000 3.1840 0.000						3.1840 1 3.2763 0 3.1840 0.000 3.1840 0.000						3.1840 1 3.3153 0 3.1840 0.000 3.1840 0.000
3.2000 2 3.4380 0 3.2000 0.000 3.2000 0.000						3.2000 1 3.2923 0 3.2000 0.000 3.2000 0.000						3.2000 4 3.3313 0 3.2000 0.000 3.2000 0.000
3.2160 2 3.4540 0 3.2160 0.000 3.2160 0.000						3.2160 1 3.3083 0 3.2160 0.000 3.2160 0.000						3.2160 1 3.3473 0 3.2160 0.000 3.2160 0.000
3.2320 4 3.4700 0 3.2320 0.000 3.2320 0.000						3.2320 1 3.3243 0 3.2320 0.000 3.2320 0.000						3.2320 3 3.3633 0 3.2320 0.000 3.2320 0.000
3.2480 2 3.4860 0 3.2480 0.000 3.2480 0.000						3.2480 0 3.3403 0 3.2480 0.000 3.2480 0.000						3.2480 0 3.3793 0 3.2480 0.000 3.2480 0.000
3.2640 0 3.5020 0 3.2640 0.000 3.2640 0.000						3.2640 1 3.3563 1 3.2640 0.000 3.2640 0.000						3.2640 3 3.3953 0 3.2640 0.000 3.2640 0.000
3.2800 3 3.5180 0 3.2800 0.000 3.2800 0.000						3.2800 2 3.3723 0 3.2800 0.000 3.2800 0.000						3.2800 1 3.4113 0 3.2800 0.000 3.2800 0.000
3.2960 3 3.5340 0 3.2960 0.000 3.2960 0.000						3.2960 1 3.3883 0 3.2960 0.000 3.2960 0.000						3.2960 3 3.4273 0 3.2960 0.000 3.2960 0.000
3.3120 0 3.5500 0 3.3120 0.000 3.3120 0.000						3.3120 0 3.4043 0 3.3120 0.000 3.3120 0.000						3.3120 1 3.4433 0 3.3120 0.000 3.3120 0.000
3.3280 0 3.5660 0 3.3280 0.000 3.3280 0.000						3.3280 1 3.4203 0 3.3280 0.000 3.3280 0.000						3.3280 1 3.4593 0 3.3280 0.000 3.3280 0.000
3.3440 1 3.5820 0 3.3440 0.000 3.3440 0.000						3.3440 1 3.4363 0 3.3440 0.000 3.3440 0.000						3.3440 1 3.4753 0 3.3440 0.000 3.3440 0.000
3.3600 2 3.5980 0 3.3600 0.000 3.3600 0.000						3.3600 0 3.4523 0 3.3600 0.000 3.3600 0.000						3.3600 1 3.4913 0 3.3600 0.000 3.3600 0.000
3.3760 1 3.6140 0 3.3760 0.000 3.3760 0.000						3.3760 1 3.4683 1 3.3760 0.000 3.3760 0.000						3.3760 2 3.5073 0 3.3760 0.000 3.3760 0.000
3.3920 2 3.6300 0 3.3920 0.000 3.3920 0.000						3.3920 2 3.4843 0 3.3920 0.000 3.3920 0.000						3.3920 1 3.5233 0 3.3920 0.000 3.3920 0.000
3.4080 2 3.6460 0 3.4080 0.000 3.4080 0.000						3.4080 2 3.5003 0 3.4080 0.000 3.4080 0.000						3.4080 1 3.5393 0 3.4080 0.000 3.4080 0.000
3.4240 2 3.6620 0 3.4240 0.000 3.4240 0.000						3.4240 0 3.5163 0 3.4240 0.000 3.4240 0.000						3.4240 3 3.5553 0 3.4240 0.000 3.4240 0.000
3.4400 1 3.6780 0 3.4400 0.000 3.4400 0.000						3.4400 0 3.5323 0 3.4400 0.000 3.4400 0.000						3.4400 3 3.5713 0 3.4400 0.000 3.4400 0.000
3.4560 0 3.6940 1 3.4560 0.000 3.4560 0.000						3.4560 0 3.5483 0 3.4560 0.000 3.4560 0.000						3.4560 0 3.5873 1 3.4560 0.000 3.4560 0.000
3.4720 1 3.7100 0 3.4720 0.000 3.4720 0.000						3.4720 1 3.5643 1 3.4720 0.000 3.4720 0.000						3.4720 1 3.6033 0 3.4720 0.000 3.4720 0.000
3.4880 1 3.7260 0 3.4880 0.000 3.4880 0.000						3.4880 2 3.5803 0 3.4880 0.000 3.4880 0.000						3.4880 2 3.6193 0 3.4880 0.000 3.4880 0.000
3.5040 3 3.7420 0 3.5040 0.000 3.5040 0.000						3.5040 3 3.5963 0 3.5040 0.000 3.5040 0.000						3.5040 1 3.6353 0 3.5040 0.000 3.5040 0.000
3.5200 0 3.7580 0 3.5200 0.000 3.5200 0.000						3.5200 2 3.6123 1 3.5200 0.000 3.5200 0.000						3.5200 3 3.6513 1 3.5200 0.000 3.5200 0.000
3.5360 0 3.7740 0 3.5360 0.000 3.5360 0.000						3.5360 2 3.6283 0 3.5360 0.000 3.5360 0.000						3.5360 0 3.6673 0 3.5360 0.000 3.5360 0.000
3.5520 2 3.7900 0 3.5520 0.000 3.5520 0.000						3.5520 0 3.6443 0 3.5520 0.000 3.5520 0.000						3.5520 1 3.6833 0 3.5520 0.000 3.5520 0.000
3.5680 0 3.8060 0 3.5680 0.000 3.5680 0.000						3.5680 2 3.6603 0 3.5680 0.000 3.5680 0.000						3.5680 3 3.6993 0 3.5680 0.000 3.5680 0.000
3.5840 2 3.8220 0 3.5840 0.000 3.5840 0.000						3.5840 0 3.6763 0 3.5840 0.000 3.5840 0.000						3.5840 2 3.7153 0 3.5840 0.000 3.5840 0.000
3.6000 2 3.8380 0 3.6000 0.000 3.6000 0.000						3.6000 1 3.6923 0 3.6000 0.000 3.6000 0.000						3.6000 1 3.7313 0 3.6000 0.000 3.6000 0.000
3.6160 1 3.8540 0 3.6160 0.000 3.6160 0.000						3.6160 2 3.7083 0 3.6160 0.000 3.6160 0.000						3.6160 2 3.7473 0 3.6160 0.000 3.6160 0.000
3.6320 2 3.8700 0 3.6320 0.000 3.6320 0.000						3.6320 0 3.7243 0 3.6320 0.000 3.6320 0.000						3.6320 2 3.7633 0 3.6320 0.000 3.6320 0.000
3.6480 0 3.8860 0 3.6480 0.000 3.6480 0.000						3.6480 0 3.7403 0 3.6480 0.000 3.6480 0.000						3.6480 4 3.7793 0 3.6480 0.000 3.6480 0.000
3.6640 0 3.9020 0 3.6640 0.000 3.6640 0.000						3.6640 1 3.7563 0 3.6640 0.000 3.6640 0.000						3.6640 0 3.7953 0 3.6640 0.000 3.6640 0.000
3.6800 1 3.9180 1 3.6800 0.000 3.6800 0.000						3.6800 1 3.7723 0 3.6800 0.000 3.6800 0.000						3.6800 1 3.8113 0 3.6800 0.000 3.6800 0.000
3.6960 1 3.9340 0 3.6960 0.000 3.6960 0.000						3.6960 3 3.7883 1 3.6960 0.000 3.6960 0.000						3.6960 3 3.8273 0 3.6960 0.000 3.6960 0.000
3.7120 1 3.9500 0 3.7120 0.000 3.7120 0.000						3.7120 1 3.8043 0 3.7120 0.000 3.7120 0.000						3.7120 2 3.8433 1 3.7120 0.000 3.7120 0.000
3.7280 2 3.9660 0 3.7280 0.000 3.7280 0.000						3.7280 2 3.8203 0 3.7280 0.000 3.7280 0.000						3.7280 2 3.8593 0 3.7280 0.000 3.7280 0.000
3.7440 1 3.9820 0 3.7440 0.000 3.7440 0.000						3.7440 0 3.8363 0 3.7440 0.000 3.7440 0.000						3.7440 0 3.8753 0 3.7440 0.000 3.7440 0.000
3.7600 1 3.9980 0 3.7600 0.000 3.7600 0.000						3.7600 0 3.8523 0 3.7600 0.000 3.7600 0.000						3.7600 0 3.8913 0 3.7600 0.000 3.7600 0.000
3.7760 1 4.0140 0 3.7760 0.000 3.7760 0.000						3.7760 3 3.8683 0 3.7760 0.000 3.7760 0.000						3.7760 1 3.9073 0 3.7760 0.000 3.7760 0.000
3.7920 1 4.0300 0 3.7920 0.000 3.7920 0.000						3.7920 2 3.8843 0 3.7920 0.000 3.7920 0.000						3.7920 4 3.9233 0 3.7920 0.000 3.7920 0.000
3.8080 0 4.0460 0 3.8080 0.000 3.8080 0.000						3.8080 1 3.9003 0 3.8080 0.000 3.8080 0.000						3.8080 3 3.9393 0 3.8080 0.000 3.8080 0.000
3.8240 2 4.0620 0 3.8240 0.000 3.8240 0.000						3.8240 0 3.9163 0 3.8240 0.000 3.8240 0.000						3.8240 2 3.9553 0 3.8240 0.000 3.8240 0.000
3.8400 1 4.0780 0 3.8400 0.000 3.8400 0.000						3.8400 0 3.9323 0 3.8400 0.000 3.8400 0.000						3.8400 3 3.9713 0 3.8400 0.000 3.8400 0.000
3.8560 0 4.0940 0 3.8560 0.000 3.8560 0.000						3.8560 0 3.9483 0 3.8560 0.000 3.8560 0.000						3.8560 2 3.9873 0 3.8560 0.000 3.8560 0.000
3.8720 3 4.1100 0 3.8720 0.000 3.8720 0.000						3.8720 1 3.9643 0 3.8720 0.000 3.8720 0.000						3.8720 1 4.0033 0 3.8720 0.000 3.8720 0.000
3.8880 3 4.1260 0 3.8880 0.000 3.8880 0.000						3.8880 3 3.9803 0 3.8880 0.000 3.8880 0.000						3.8880 1 4.0193 0 3.8880 0.000 3.8880 0.000
3.9040 2 4.1420 0 3.9040 0.000 3.9040 0.000						3.9040 2 3.9963 0 3.9040 0.000 3.9040 0.000						3.9040 0 4.0353 0 3.9040 0.000 3.9040 0.000
3.9200 3 4.1580 0 3.9200 0.000 3.9200 0.000						3.9200 1 4.0123 0 3.9200 0.000 3.9200 0.000						3.9200 1 4.0513 0 3.9200 0.000 3.9200 0.000
3.9360 2 4.1740 0 3.9360 0.000 3.9360 0.000						3.9360 3 4.0283 0 3.9360 0.000 3.9360 0.000						3.9360 3 4.0673 0 3.9360 0.000 3.9360 0.000
3.9520 3 4.1900 0 3.9520 0.000 3.9520 0.000						3.9520 0 4.0443 0 3.9520 0.000 3.9520 0.000						3.9520 2 4.0833 0 3.9520 0.000 3.9520 0.000
3.9680 1 4.2060 0 3.9680 0.000 3.9680 0.000						3.9680 1 4.0603 0 3.9680 0.000 3.9680 0.000						3.9680 2 4.0993 0 3.9680 0.000 3.9680 0.000
3.9840 1 4.2220 0 3.9840 0.000 3.9840 0.000						3.9840 0 4.0763 0 3.9840 0.000 3.9840 0.000						3.9840 0 4.1153 0 3.9840 0.000 3.9840 0.000
4.0000 1 4.2380 0 4.0000 0.000 4.0000 0.000						4.0000 2 4.0923 0 4.0000 0.000 4.0000 0.000						4.0000 3 4.1313 0 4.0000 0.000 4.0000 0.000
4.0160 0 4.2540 0 4.0160 0.000 4.0160 0.000						4.0160 0 4.1083 0 4.0160 0.000 4.0160 0.000						4.0160 1 4.1473 0 4.0160 0.000 4.0160 0.000
4.0320 1 4.2700 0 4.0320 0.000 4.0320 0.000						4.0320 1 4.1243 0 4.0320 0.000 4.0320 0.000						4.0320 0 4.1633 0 4.0320 0.000 4.0320 0.000
4.0480 0 4.2860 0 4.0480 0.000 4.0480 0.000						4.0480 1 4.1403 0 4.0480 0.000 4.0480 0.000						4.0480 1 4.1793 0 4.0480 0.000 4.0480 0.000
4.0640 4 4.3020 0 4.0640 0.000 4.0640 0.000						4.0640 4 4.1563 1 4.0640 0.000 4.0640 0.000						4.0640 1 4.1953 0 4.0640 0.000 4.0640 0.000
4.0800 2 4.3180 0 4.0800 0.000 4.0800 0.000						4.0800 1 4.1723 0 4.0800 0.000 4.0800 0.000						4.0800 3 4.2113 0 4.0800 0.000 4.0800 0.000
4.0960 0 4.3340 0 4.0960 0.000 4.0960 0.000						4.0960 0 4.1883 0 4.0960 0.000 4.0960 0.000						4.0960 1 4.2273 0 4.0960 0.000 4.0960 0.000
4.1120 3 4.3500 0 4.1120 0.000 4.1120 0.000						4.1120 0 4.2043 0 4.1120 0.000 4.1120 0.000						4.1120 2 4.2433 0 4.1120 0.000 4.1120 0.000
4.1280 1 4.3660 0 4.1280 0.000 4.1280 0.000						4.1280 1 4.2203 0 4.1280 0.000 4.1280 0.000						4.1280 0 4.2593 0 4.1280 0.000 4.1280 0.000
4.1440 5 4.3820 0 4.1440 0.000 4.1440 0.000						4.1440 0 4.2363 0 4.1440 0.000 4.1440 0.000						4.1440 4 4.2753 0 4.1440 0.000 4.1440 0.000
4.1600 3 4.3980 0 4.1600 0.000 4.1600 0.000						4.1600 1 4.2523 0 4.1600 0.000 4.1600 0.000						4.1600 1 4.2913 0 4.1600 0.000 4.1600 0.000
4.1760 2 4.4140 0 4.1760 0.000 4.1760 0.000						4.1760 3 4.2683 0 4.1760 0.000 4.1760 0.000						4.1760 1 4.3073 0 4.1760 0.000 4.1760 0.000
4.1920 2 4.4300 0 4.1920 0.000 4.1920 0.000						4.1920 0 4.2843 1 4.1920 0.000 4.1920 0.000						4.1920 3 4.3233 0 4.1920 0.000 4.1920 0.000
4.2080 1 4.4460 0 4.2080 0.000 4.2080 0.000						4.2080 2 4.3003 0 4.2080 0.000 4.2080 0.000						4.2080 4 4.3393 0 4.2080 0.000 4.2080 0.000
4.2240 3 4.4620 0 4.2240 0.000 4.2240 0.000						4.2240 0 4.3163 0 4.2240 0.000 4.2240 0.000						4.2240 2 4.3553 0 4.2240 0.000 4.2240 0.000
4.2400 3 4.4780 0 4.2400 0.000 4.2400 0.000						4.2400 2 4.3323 0 4.2400 0.000 4.2400 0.000						4.2400 1 4.3713 0 4.2400 0.000 4.2400 0.000
4.2560 0 4.4940 0 4.2560 0.000 4.2560 0.000						4.2560 0 4.3483 0 4.2560 0.000 4.2560 0.000						4.2560 1 4.3873 0 4.2560 0.000 4.2560 0.000
4.2720 1 4.5100 0 4.2720 0.000 4.2720 0.000						4.2720 1 4.3643 0 4.2720 0.000 4.2720 0.000						4.2720 0 4.4033 0 4.2720 0.000 4.2720 0.000
4.2880 2 4.5260 0 4.2880 0.000 4.2880 0.000						4.2880 1 4.3803 0 4.2880 0.000 4.2880 0.000						4.2880 2 4.4193 0 4.2880 0.000 4.2880 0.000
4.3040 2 4.5420 0 4.3040 0.000 4.3040 0.000						4.3040 1 4.3963 0 4.3040 0.000 4.3040 0.000						4.3040 2 4.4353 0 4.3040 0.000 4.3040 0.000
4.3200 1 4.5580 0 4.3200 0.000 4.3200 0.000						4.3200 1 4.4123 0 4.3200 0.000 4.3200 0.000						4.3200 3 4.4513 0 4.3200 0.000 4.3200 0.000
4.3360 0 4.5740 1 4.3360 0.000 4.3360 0.000						4.3360 0 4.4283 0 4.3360 0.000 4.3360 0.000						4.3360 2 4.4673 0 4.3360 0.000 4.3360 0.000
4.3520 0 4.5900 1 4.3520 0.000 4.3520 0.000						4.3520 2 4.4443 0 4.3520 0.000 4.3520 0.000						4.3520 1 4.4833 0 4.3520 0.000 4.3520 0.000
4.3680 3 4.6060 0 4.3680 0.000 4.3680 0.000						4.3680 3 4.4603 0 4.3680 0.000 4.3680 0.000						4.3680 1 4.4993 0 4.3680 0.000 4.3680 0.000
4.3840 1 4.6220 0 4.3840 0.000 4.3840 0.000						4.3840 2 4.4763 0 4.3840 0.000 4.3840 0.000						4.3840 1 4.5153 0 4.3840 0.000 4.3840 0.000
4.4000 2 4.6380 0 4.4000 0.000 4.4000 0.000						4.4000 2 4.4923 0 4.4000 0.000 4.4000 0.000						4.4000 2 4.5313 0 4.4000 0.000 4.4000 0.000
4.4160 1 4.6540 0 4.4160 0.000 4.4160 0.000						4.4160 2 4.5083 0 4.4160 0.000 4.4160 0.000						4.4160 1 4.5473 0 4.4160 0.000 4.4160 0.000
4.4320 3 4.6700 0 4.4320 0.000 4.4320 0.000						4.4320 1 4.5243 0 4.4320 0.000 4.4320 0.000						4.4320 0 4.5633 0 4.4320 0.000 4.4320 0.000
4.4480 1 4.6860 0 4.4480 0.000 4.4480 0.000						4.4480 2 4.5403 0 4.4480 0.000 4.4480 0.000						4.4480 2 4.5793 0 4.4480 0.000 4.4480 0.000
4.4640 1 4.7020 0 4.4640 0.000 4.4640 0.000						4.4640 0 4.5563 0 4.4640 0.000 4.4640 0.000						4.4640 1 4.5953 0 4.4640 0.000 4.4640 0.000
4.4800 1 4.7180 0 4.4800 0.000 4.4800 0.000						4.4800 2 4.5723 0 4.4800 0.000 4.4800 0.000						4.4800 1 4.6113 0 4.4800 0.000 4.4800 0.000
4.4960 0 4.7340 0 4.4960 0.000 4.4960 0.000						4.4960 1 4.5883 0 4.4960 0.000 4.4960 0.000						4.4960 3 4.6273 0 4.4960 0.000 4.4960 0.000
4.5120 1 4.7500 0 4.5120 0.000 4.5120 0.000						4.5120 2 4.6043 0 4.5120 0.000 4.5120 0.000						4.5120 1 4.6433 0 4.5120 0.000 4.5120 0.000
4.5280 0 4.7660 0 4.5280 0.000 4.5280 0.000						4.5280 1 4.6203 0 4.5280 0.000 4.5280 0.000						4.5280 0 4.6593 0 4.5280 0.000 4.5280 0.000
4.5440 0 4.7820 1 4.5440 0.000 4.5440 0.000						4.5440 1 4.6363 0 4.5440 0.000 4.5440 0.000						4.5440 1 4.6753 0 4.5440 0.000 4.5440 0.000
4.5600 2 4.7980 0 4.5600 0.000 4.5600 0.000						4.5600 0 4.6523 0 4.5600 0.000 4.5600 0.000						4.5600 2 4.6913 0 4.5600 0.000 4.5600 0.000
4.5760 0 4.8140 0 4.5760 0.000 4.5760 0.000						4.5760 3 4.6683 0 4.5760 0.000 4.5760 0.000						4.5760 3 4.7073 0 4.5760 0.000 4.5760 0.000
4.5920 1 4.8300 0 4.5920 0.000 4.5920 0.000						4.5920 0 4.6843 0 4.5920 0.000 4.5920 0.000						4.5920 1 4.7233 0 4.5920 0.000 4.5920 0.000
4.6080 2 4.8460 0 4.6080 0.000 4.6080 0.000						4.6080 1 4.7003 0 4.6080 0.000 4.6080 0.000						4.6080 2 4.7393 0 4.6080 0.000 4.6080 0.000
4.6240 2 4.8620 0 4.6240 0.000 4.6240 0.000						4.6240 5 4.7163 0 4.6240 0.000 4.6240 0.000						4.6240 3 4.7553 0 4.6240 0.000 4.6240 0.000
4.6400 3 4.8780 0 4.6400 0.000 4.6400 0.000						4.6400 2 4.7323 0 4.6400 0.000 4.6400 0.000						4.6400 1 4.7713 0 4.6400 0.000 4.6400 0.000
4.6560 2 4.8940 0 4.6560 0.000 4.6560 0.000						4.6560 2 4.7483 0 4.6560 0.000 4.6560 0.000						4.6560 2 4.7873 0 4.6560 0.000 4.6560 0.000
4.6720 1 4.9100 0 4.6720 0.000 4.6720 0.000						4.6720 2 4.7643 0 4.6720 0.000 4.6720 0.000						4.6720 1 4.8033 0 4.6720 0.000 4.6720 0.000
4.6880 2 4.9260 0 4.6880 0.000 4.6880 0.000						4.6880 1 4.7803 0 4.6880 0.000 4.6880 0.000						4.6880 1 4.8193 0 4.6880 0.000 4.6880 0.000
4.7040 1 4.9420 0 4.7040 0.000 4.7040 0.000						4.7040 4 4.7963 0 4.7040 0.000 4.7040 0.000						4.7040 1 4.8353 0 4.7040 0.000 4.7040 0.000
4.7200 3 4.9580 0 4.7200 0.000 4.7200 0.000						4.7200 0 4.8123 0 4.7200 0.000 4.7200 0.000						4.7200 0 4.8513 0 4.7200 0.000 4.7200 0.000
4.7360 1 4.9740 0 4.7360 0.000 4.7360 0.000						4.7360 1 4.8283 0 4.7360 0.000 4.7360 0.000						4.7360 3 4.8673 0 4.7360 0.000 4.7360 0.000
4.7520 4 4.9900 0 4.7520 0.000 4.7520 0.000						4.7520 1 4.8443 0 4.7520 0.000 4.7520 0.000						4.7520 0 4.8833 0 4.7520 0.000 4.7520 0.000
4.7680 3 5.0060 0 4.7680 0.000 4.7680 0.000						4.7680 0 4.8603 0 4.7680 0.000 4.7680 0.000						4.7680 2 4.8993 0 4.7680 0.000 4.7680 0.000
4.7840 3 5.0220 0 4.7840 0.000 4.7840 0.000						4.7840 1 4.8763 0 4.7840 0.000 4.7840 0.000						4.7840 1 4.9153 0 4.7840 0.000 4.7840 0.000
4.8000 0 5.0380 0 4.8000 0.000 4.8000 0.000						4.8000 0 4.8923 1 4.8000 0.000 4.8000 0.000						4.8000 2 4.9313 0 4.8000 0.000 4.8000 0.000
4.8160 1 5.0540 0 4.8160 0.000 4.8160 0.000						4.8160 0 4.9083 0 4.8160 0.000 4.8160 0.000						4.8160 0 4.9473 1 4.8160 0.000 4.8160 0.000
4.8320 0 5.0700 0 4.8320 0.000 4.8320 0.000						4.8320 1 4.9243 0 4.8320 0.000 4.8320 0.000						4.8320 0 4.9633 0 4.8320 0.000 4.8320 0.000
4.8480 2 5.0860 0 4.8480 0.000 4.8480 0.000						4.8480 1 4.9403 0 4.8480 0.000 4.8480 0.000						4.8480 0 4.9793 1 4.8480 0.000 4.8480 0.000
4.8640 0 5.1020 0 4.8640 0.000 4.8640 0.000						4.8640 3 4.9563 0 4.8640 0.000 4.8640 0.000						4.8640 2 4.9953 0 4.8640 0.000 4.8640 0.000
4.8800 3 5.1180 0 4.8800 0.000 4.8800 0.000						4.8800 1 4.9723 0 4.8800 0.000 4.8800 0.000						4.8800 1 5.0113 0 4.8800 0.000 4.8800 0.000
4.8960 1 5.1340 0 4.8960 0.000 4.8960 0.000						4.8960 2 4.9883 0 4.8960 0.000 4.8960 0.000						4.8960 2 5.0273 0 4.8960 0.000 4.8960 0.000
4.9120 1 5.1500 0 4.9120 0.000 4.9120 0.000						4.9120 0 5.0043 0 4.9120 0.000 4.9120 0.000						4.9120 1 5.0433 0 4.9120 0.000 4.9120 0.000
4.9280 3 5.1660 0 4.9280 0.000 4.9280 0.000						4.9280 1 5.0203 0 4.9280 0.000 4.9280 0.000						4.9280 3 5.0593 0 4.9280 0.000 4.9280 0.000
4.9440 2 5.1820 0 4.9440 0.000 4.9440 0.000						4.9440 4 5.0363 0 4.9440 0.000 4.9440 0.000						4.9440 0 5.0753 0 4.9440 0.000 4.9440 0.000
4.9600 0 5.1980 0 4.9600 0.000 4.9600 0.000						4.9600 1 5.0523 0 4.9600 0.000 4.9600 0.000						4.9600 2 5.0913 0 4.9600 0.000 4.9600 0.000
4.9760 2 5.2140 0 4.9760 0.000 4.9760 0.000						4.9760 2 5.0683 0 4.9760 0.000 4.9760 0.000						4.9760 0 5.1073 0 4.9760 0.000 4.9760 0.000
4.9920 0 5.2300 0 4.9920 0.000 4.9920 0.000						4.9920 3 5.0843 0 4.9920 0.000 4.9920 0.000						4.9920 2 5.1233 0 4.9920 0.000 4.9920 0.000
5.0080 2 5.2460 0 5.0080 0.000 5.0080 0.000						5.0080 2 5.1003 0 5.0080 0.000 5.0080 0.000						5.0080 0 5.1393 1 5.0080 0.000 5.0080 0.000
5.0240 1 5.2620 0 5.0240 0.000 5.0240 0.000						5.0240 3 5.1163 0 5.0240 0.000 5.0240 0.000						5.0240 3 5.1553 1 5.0240 0.000 5.0240 0.000
5.0400 0 5.2780 0 5.0400 0.000 5.0400 0.000						5.0400 0 5.1323 0 5.0400 0.000 5.0400 0.000						5.0400 2 5.1713 0 5.0400 0.000 5.0400 0.000
5.0560 0 5.2940 0 5.0560 0.000 5.0560 0.000						5.0560 2 5.1483 0 5.0560 0.000 5.0560 0.000						5.0560 2 5.1873 0 5.0560 0.000 5.0560 0.000
5.0720 2 5.3100 1 5.0720 0.000 5.0720 0.000						5.0720 0 5.1643 0 5.0720 0.000 5.0720 0.000						5.0720 1 5.2033 0 5.0720 0.000 5.0720 0.000
5.0880 2 5.3260 0 5.0880 0.000 5.0880 0.000						5.0880 1 5.1803 0 5.0880 0.000 5.0880 0.000						5.0880 1 5.2193 0 5.0880 0.000 5.0880 0.000
5.1040 1 5.3420 1 5.1040 0.000 5.1040 0.000						5.1040 2 5.1963 0 5.1040 0.000 5.1040 0.000						5.1040 1 5.2353 0 5.1040 0.000 5.1040 0.000
5.1200 2 5.3580 0 5.1200 0.000 5.1200 0.000						5.1200 0 5.2123 0 5.1200 0.000 5.1200 0.000						5.1200 0 5.2513 0 5.1200 0.000 5.1200 0.000
5.1360 1 5.3740 0 5.1360 0.000 5.1360 0.000						5.1360 3 5.2283 0 5.1360 0.000 5.1360 0.000						5.1360 1 5.2673 0 5.1360 0.000 5.1360 0.000
5.1520 0 5.3900 0 5.1520 0.000 5.1520 0.000						5.1520 1 5.2443 0 5.1520 0.000 5.1520 0.000						5.1520 1 5.2833 0 5.1520 0.000 5.1520 0.000
5.1680 2 5.4060 0 5.1680 0.000 5.1680 0.000						5.1680 1 5.2603 0 5.1680 0.000 5.1680 0.000						5.1680 0 5.2993 0 5.1680 0.000 5.1680 0.000
5.1840 3 5.4220 0 5.1840 0.000 5.1840 0.000						5.1840 0 5.2763 0 5.1840 0.000 5.1840 0.000						5.1840 3 5.3153 0 5.1840 0.000 5.1840 0.000
5.2000 0 5.4380 2 5.2000 0.000 5.2000 0.000						5.2000 3 5.2923 0 5.2000 0.000 5.2000 0.000						5.2000 1 5.3313 0 5.2000 0.000 5.2000 0.000
5.2160 0 5.4540 0 5.2160 0.000 5.2160 0.000						5.2160 0 5.3083 0 5.2160 0.000 5.2160 0.000						5.2160 0 5.3473 0 5.2160 0.000 5.2160 0.000
5.2320 2 5.4700 0 5.2320 0.000 5.2320 0.000						5.2320 2 5.3243 0 5.2320 0.000 5.2320 0.000						5.2320 4 5.3633 0 5.2320 0.000 5.2320 0.000
5.2480 2 5.4860 0 5.2480 0.000 5.2480 0.000						5.2480 2 5.3403 0 5.2480 0.000 5.2480 0.000						5.2480 0 5.3793 0 5.2480 0.000 5.2480 0.000
5.2640 0 5.5020 0 5.2640 0.000 5.2640 0.000						5.2640 0 5.3563 0 5.2640 0.000 5.2640 0.000						5.2640 2 5.3953 0 5.2640 0.000 5.2640 0.000
5.2800 0 5.5180 0 5.2800 0.000 5.2800 0.000						5.2800 2 5.3723 0 5.2800 0.000 5.2800 0.000						5.2800 0 5.4113 0 5.2800 0.000 5.2800 0.000
5.2960 0 5.5340 0 5.2960 0.000 5.2960 0.000						5.2960 2 5.3883 0 5.2960 0.000 5.2960 0.000						5.2960 0 5.4273 0 5.2960 0.000 5.2960 0.000
5.3120 3 5.5500 0 5.3120 0.000 5.3120 0.000						5.3120 2 5.4043 0 5.3120 0.000 5.3120 0.000						5.3120 3 5.4433 0 5.3120 0.000 5.3120 0.000
5.3280 2 5.5660 0 5.3280 0.000 5.3280 0.000						5.3280 3 5.4203 0 5.3280 0.000 5.3280 0.000						5.3280 5 5.4593 0 5.3280 0.000 5.3280 0.000
5.3440 2 5.5820 0 5.3440 0.000 5.3440 0.000						5.3440 1 5.4363 0 5.3440 0.000 5.3440 0.000						5.3440 1 5.4753 0 5.3440 0.000 5.3440 0.000
5.3600 1 5.5980 1 5.3600 0.000 5.3600 0.000						5.3600 1 5.4523 0 5.3600 0.000 5.3600 0.000						5.3600 0 5.4913 0 5.3600 0.000 5.3600 0.000
5.3760 1 5.6140 0 5.3760 0.000 5.3760 0.000						5.3760 0 5.4683 0 5.3760 0.000 5.3760 0.000						5.3760 3 5.5073 0 5.3760 0.000 5.3760 0.000
5.3920 0 5.6300 0 5.3920 0.000 5.3920 0.000						5.3920 0 5.4843 0 5.3920 0.000 5.3920 0.000						5.3920 0 5.5233 0 5.3920 0.000 5.3920 0.000
5.4080 1 5.6460 0 5.4080 0.000 5.4080 0.000						5.4080 2 5.5003 0 5.4080 0.000 5.4080 0.000						5.4080 1 5.5393 0 5.4080 0.000 5.4080 0.000
5.4240 0 5.6620 0 5.4240 0.000 5.4240 0.000						5.4240 0 5.5163 0 5.4240 0.000 5.4240 0.000						5.4240 2 5.5553 0 5.4240 0.000 5.4240 0.000
5.4400 4 5.6780 0 5.4400 0.000 5.4400 0.000						5.4400 1 5.5323 0 5.4400 0.000 5.4400 0.000						5.4400 2 5.5713 0 5.4400 0.000 5.4400 0.000
5.4560 3 5.6940 0 5.4560 0.000 5.4560 0.000						5.4560 3 5.5483 0 5.4560 0.000 5.4560 0.000						5.4560 2 5.5873 0 5.4560 0.000 5.4560 0.000
5.4720 2 5.7100 0 5.4720 0.000 5.4720 0.000						5.4720 2 5.5643 0 5.4720 0.000 5.4720 0.000						5.4720 2 5.6033 0 5.4720 0.000 5.4720 0.000
5.4880 1 5.7260 0 5.4880 0.000 5.4880 0.000						5.4880 2 5.5803 0 5.4880 0.000 5.4880 0.000						5.4880 4 5.6193 0 5.4880 0.000 5.4880 0.000
5.5040 1 5.7420 0 5.5040 0.000 5.5040 0.000						5.5040 0 5.5963 0 5.5040 0.000 5.5040 0.000						5.5040 1 5.6353 0 5.5040 0.000 5.5040 0.000
5.5200 2 5.7580 0 5.5200 0.000 5.5200 0.000						5.5200 3 5.6123 0 5.5200 0.000 5.5200 0.000						5.5200 1 5.6513 0 5.5200 0.000 5.5200 0.000
5.5360 1 5.7740 0 5.5360 0.000 5.5360 0.000						5.5360 2 5.6283 0 5.5360 0.000 5.5360 0.000						5.5360 2 5.6673 0 5.5360 0.000 5.5360 0.000
5.5520 1 5.7900 0 5.5520 0.000 5.5520 0.000						5.5520 2 5.6443 0 5.5520 0.000 5.5520 0.000						5.5520 1 5.6833 0 5.5520 0.000 5.5520 0.000
5.5680 1 5.8060 0 5.5680 0.000 5.5680 0.000						5.5680 1 5.6603 0 5.5680 0.000 5.5680 0.000						5.5680 1 5.6993 0 5.5680 0.000 5.5680 0.000
5.5840 2 5.8220 0 5.5840 0.000 5.5840 0.000						5.5840 3 5.6763 0 5.5840 0.000 5.5840 0.000						5.5840 0 5.7153 0 5.5840 0.000 5.5840 0.000
5.6000 2 5.8380 0 5.6000 0.000 5.6000 0.000						5.6000 2 5.6923 0 5.6000 0.000 5.6000 0.000						5.6000 3 5.7313 0 5.6000 0.000 5.6000 0.000
5.6160 2 5.8540 0 5.6160 0.000 5.6160 0.000						5.6160 1 5.7083 0 5.6160 0.000 5.6160 0.000						5.6160 1 5.7473 0 5.6160 0.000 5.6160 0.000
5.6320 1 5.8700 0 5.6320 0.000 5.6320 0.000						5.6320 1 5.7243 0 5.6320 0.000 5.6320 0.000						5.6320 1 5.7633 0 5.6320 0.000 5.6320 0.000
5.6480 1 5.8860 0 5.6480 0.000 5.6480 0.000						5.6480 1 5.7403 0 5.6480 0.000 5.6480 0.000						5.6480 0 5.7793 0 5.6480 0.000 5.6480 0.000
5.6640 4 5.9020 0 5.6640 0.000 5.6640 0.000						5.6640 1 5.7563 0 5.6640 0.000 5.6640 0.000						5.6640 2 5.7953 0 5.6640 0.000 5.6640 0.000
5.6800 0 5.9180 0 5.6800 0.000 5.6800 0.000						5.6800 0 5.7723 0 5.6800 0.000 5.6800 0.000						5.6800 0 5.8113 0 5.6800 0.000 5.6800 0.000
5.6960 2 5.9340 0 5.6960 0.000 5.6960 0.000						5.6960 1 5.7883 0 5.6960 0.000 5.6960 0.000						5.6960 2 5.8273 0 5.6960 0.000 5.6960 0.000
5.7120 2 5.9500 0 5.7120 0.000 5.7120 0.000						5.7120 3 5.8043 0 5.7120 0.000 5.7120 0.000						5.7120 3 5.8433 0 5.7120 0.000 5.7120 0.000
5.7280 3 5.9660 0 5.7280 0.000 5.7280 0.000						5.7280 0 5.8203 0 5.7280 0.000 5.7280 0.000						5.7280 3 5.8593 0 5.7280 0.000 5.7280 0.000
5.7440 2 5.9820 0 5.7440 0.000 5.7440 0.000						5.7440 0 5.8363 0 5.7440 0.000 5.7440 0.000						5.7440 2 5.8753 0 5.7440 0.000 5.7440 0.000
5.7600 1 5.9980 0 5.7600 0.000 5.7600 0.000						5.7600 2 5.8523 0 5.7600 0.000 5.7600 0.000						5.7600 1 5.8913 0 5.7600 0.000 5.7600 0.000
5.7760 0 6.0140 0 5.7760 0.000 5.7760 0.000						5.7760 1 5.8683 0 5.7760 0.000 5.7760 0.000						5.7760 0 5.9073 0 5.7760 0.000 5.7760 0.000
5.7920 0 6.0300 0 5.7920 0.000 5.7920 0.000						5.7920 0 5.8843 0 5.7920 0.000 5.7920 0.000						5.7920 1 5.9233 0 5.7920 0.000 5.7920 0.000
5.8080 0 6.0460 0 5.8080 0.000 5.8080 0.000						5.8080 0 5.9003 0 5.8080 0.000 5.8080 0.000						5.8080 1 5.9393 0 5.8080 0.000 5.8080 0.000
5.8240 0 6.0620 0 5.8240 0.000 5.8240 0.000						5.8240 1 5.9163 0 5.8240 0.000 5.8240 0.000						5.8240 2 5.9553 0 5.8240 0.000 5.8240 0.000
5.8400 1 6.0780 0 5.8400 0.000 5.8400 0.000						5.8400 3 5.9323 0 5.8400 0.000 5.8400 0.000						5.8400 3 5.9713 1 5.8400 0.000 5.8400 0.000
5.8560 1 6.0940 0 5.8560 0.000 5.8560 0.000						5.8560 1 5.9483 0 5.8560 0.000 5.8560 0.000						5.8560 0 5.9873 0 5.8560 0.000 5.8560 0.000
5.8720 2 6.1100 0 5.8720 0.000 5.8720 0.000						5.8720 1 5.9643 0 5.8720 0.000 5.8720 0.000						5.8720 1 6.0033 0 5.8720 0.000 5.8720 0.000
5.8880 1 6.1260 1 5.8880 0.000 5.8880 0.000						5.8880 2 5.9803 0 5.8880 0.000 5.8880 0.000						5.8880 2 6.0193 0 5.8880 0.000 5.8880 0.000
5.9040 2 6.1420 0 5.9040 0.000 5.9040 0.000						5.9040 1 5.9963 0 5.9040 0.000 5.9040 0.000						5.9040 2 6.0353 0 5.9040 0.000 5.9040 0.000
5.9200 3 6.1580 0 5.9200 0.000 5.9200 0.000						5.9200 2 6.0123 0 5.9200 0.000 5.9200 0.000						5.9200 4 6.0513 0 5.9200 0.000 5.9200 0.000
5.9360 3 6.1740 0 5.9360 0.000 5.9360 0.000						5.9360 1 6.0283 0 5.9360 0.000 5.9360 0.000						5.9360 5 6.0673 0 5.9360 0.000 5.9360 0.000
5.9520 1 6.1900 0 5.9520 0.000 5.9520 0.000						5.9520 0 6.0443 0 5.9520 0.000 5.9520 0.000						5.9520 1 6.0833 0 5.9520 0.000 5.9520 0.000
5.9680 1 6.2060 0 5.9680 0.000 5.9680 0.000						5.9680 2 6.0603 0 5.9680 0.000 5.9680 0.000						5.9680 1 6.0993 0 5.9680 0.000 5.9680 0.000
5.9840 0 6.2220 0 5.9840 0.000 5.9840 0.000						5.9840 1 6.0763 1 5.9840 0.000 5.9840 0.000						5.9840 2 6.1153 0 5.9840 0.000 5.9840 0.000
6.0000 1 6.2380 0 6.0000 0.000 6.0000 0.000						6.0000 2 6.0923 0 6.0000 0.000 6.0000 0.000						6.0000 2 6.1313 0 6.0000 0.000 6.0000 0.000
6.0160 1 6.2540 0 6.0160 0.000 6.0160 0.000						6.0160 3 6.1083 1 6.0160 0.000 6.0160 0.000						6.0160 0 6.1473 0 6.0160 0.000 6.0160 0.000
6.0320 3 6.2700 0 6.0320 0.000 6.0320 0.000						6.0320 1 6.1243 0 6.0320 0.000 6.0320 0.000						6.0320 3 6.1633 0 6.0320 0.000 6.0320 0.000
6.0480 1 6.2860 0 6.0480 0.000 6.0480 0.000						6.0480 1 6.1403 0 6.0480 0.000 6.0480 0.000						6.0480 3 6.1793 1 6.0480 0.000 6.0480 0.000
6.0640 1 6.3020 0 6.0640 0.000 6.0640 0.000						6.0640 2 6.1563 0 6.0640 0.000 6.0640 0.000						6.0640 2 6.1953 0 6.0640 0.000 6.0640 0.000
6.0800 1 6.3180 0 6.0800 0.000 6.0800 0.000						6.0800 0 6.1723 0 6.0800 0.000 6.0800 0.000						6.0800 0 6.2113 0 6.0800 0.000 6.0800 0.000
6.0960 0 6.3340 0 6.0960 0.000 6.0960 0.000						6.0960 1 6.1883 0 6.0960 0.000 6.0960 0.000						6.0960 2 6.2273 0 6.0960 0.000 6.0960 0.000
6.1120 1 6.3500 1 6.1120 0.000 6.1120 0.000						6.1120 1 6.2043 0 6.1120 0.000 6.1120 0.000						6.1120 3 6.2433 1 6.1120 0.000 6.1120 0.000
6.1280 2 6.3660 0 6.1280 0.000 6.1280 0.000						6.1280 1 6.2203 0 6.1280 0.000 6.1280 0.000						6.1280 1 6.2593 0 6.1280 0.000 6.1280 0.000
6.1440 0 6.3820 0 6.1440 0.000 6.1440 0.000						6.1440 1 6.2363 0 6.1440 0.000 6.1440 0.000						6.1440 2 6.2753 0 6.1440 0.000 6.1440 0.000
6.1600 1 6.3980 0 6.1600 0.000 6.1600 0.000						6.1600 2 6.2523 0 6.1600 0.000 6.1600 0.000						6.1600 0 6.2913 0 6.1600 0.000 6.1600 0.000
6.1760 2 6.4140 0 6.1760 0.000 6.1760 0.000						6.1760 2 6.2683 0 6.1760 0.000 6.1760 0.000						6.1760 3 6.3073 0 6.1760 0.000 6.1760 0.000
6.1920 1 6.4300 1 6.1920 0.000 6.1920 0.000						6.1920 1 6.2843 0 6.1920 0.000 6.1920 0.000						6.1920 1 6.3233 0 6.1920 0.000 6.1920 0.000
6.2080 2 6.4460 1 6.2080 0.000 6.2080 0.000						6.2080 1 6.3003 0 6.2080 0.000 6.2080 0.000						6.2080 0 6.3393 0 6.2080 0.000 6.2080 0.000
6.2240 1 6.4620 0 6.2240 0.000 6.2240 0.000						6.2240 0 6.3163 0 6.2240 0.000 6.2240 0.000						6.2240 1 6.3553 0 6.2240 0.000 6.2240 0.000
6.2400 2 6.4780 2 6.2400 0.000 6.2400 0.000						6.2400 3 6.3323 0 6.2400 0.000 6.2400 0.000						6.2400 1 6.3713 0 6.2400 0.000 6.2400 0.000
6.2560 0 6.4940 0 6.2560 0.000 6.2560 0.000						6.2560 2 6.3483 0 6.2560 0.000 6.2560 0.000						6.2560 4 6.3873 0 6.2560 0.000 6.2560 0.000
6.2720 2 6.5100 0 6.2720 0.000 6.2720 0.000						6.2720 2 6.3643 0 6.2720 0.000 6.2720 0.000						6.2720 0 6.4033 0 6.2720 0.000 6.2720 0.000
6.2880 0 6.5260 0 6.2880 0.000 6.2880 0.000						6.2880 2 6.3803 1 6.2880 0.000 6.2880 0.000						6.2880 2 6.4193 0 6.2880 0.000 6.2880 0.000
6.3040 1 6.5420 0 6.3040 0.000 6.3040 0.000						6.3040 2 6.3963 1 6.3040 0.000 6.3040 0.000						6.3040 2 6.4353 1 6.3040 0.000 6.3040 0.000
6.3200 5 6.5580 1 6.3200 0.000 6.3200 0.000						6.3200 1 6.4123 0 6.3200 0.000 6.3200 0.000						6.3200 1 6.4513 0 6.3200 0.000 6.3200 0.000
6.3360 1 6.5740 1 6.3360 0.000 6.3360 0.000						6.3360 3 6.4283 0 6.3360 0.000 6.3360 0.000						6.3360 2 6.4673 1 6.3360 0.000 6.3360 0.000
6.3520 2 6.5900 1 6.3520 0.000 6.3520 0.000						6.3520 2 6.4443 0 6.3520 0.000 6.3520 0.000						6.3520 3 6.4833 1 6.3520 0.000 6.3520 0.000
6.3680 6 6.6060 0 6.3680 0.000 6.3680 0.000						6.3680 5 6.4603 1 6.3680 0.000 6.3680 0.000						6.3680 0 6.4993 1 6.3680 0.000 6.3680 0.000
6.3840 2 6.6220 4 6.3840 0.000 6.3840 0.000						6.3840 0 6.4763 0 6.3840 0.000 6.3840 0.000						6.3840 2 6.5153 3 6.3840 0.000 6.3840 0.000
6.4000 3 6.6380 6 6.4000 0.000 6.4000 0.000						6.4000 1 6.4923 0 6.4000 0.000 6.4000 0.000						6.4000 2 6.5313 0 6.4000 0.000 6.4000 0.000
6.4160 1 6.6540 5 6.4160 0.000 6.4160 0.000						6.4160 1 6.5083 0 6.4160 0.000 6.4160 0.000						6.4160 0 6.5473 0 6.4160 0.000 6.4160 0.000
6.4320 3 6.6700 14 6.4320 0.000 6.4320 0.000						6.4320 2 6.5243 0 6.4320 0.000 6.4320 0.000						6.4320 3 6.5633 0 6.4320 0.000 6.4320 0.000
6.4480 3 6.6860 15 6.4480 0.000 6.4480 0.000						6.4480 1 6.5403 0 6.4480 0.000 6.4480 0.000						6.4480 2 6.5793 1 6.4480 0.000 6.4480 0.000
6.4640 3 6.7020 32 6.4640 0.000 6.4640 0.000						6.4640 2 6.5563 1 6.4640 0.000 6.4640 0.000						6.4640 4 6.5953 1 6.4640 0.000 6.4640 0.000
6.4800 2 6.7180 46 6.4800 0.000 6.4800 0.000						6.4800 1 6.5723 4 6.4800 0.000 6.4800 0.000						6.4800 4 6.6113 3 6.4800 0.000 6.4800 0.000
6.4960 0 6.7340 106 6.4960 0.000 6.4960 0.000						6.4960 0 6.5883 3 6.4960 0.000 6.4960 0.000						6.4960 4 6.6273 1 6.4960 0.000 6.4960 0.000
6.5120 1 6.7500 177 6.5120 0.000 6.5120 0.000						6.5120 2 6.6043 1 6.5120 0.000 6.5120 0.000						6.5120 3 6.6433 3 6.5120 0.000 6.5120 0.000
6.5280 3 6.7660 297 6.5280 0.000 6.5280 0.000						6.5280 1 6.6203 3 6.5280 0.000 6.5280 0.000						6.5280 3 6.6593 1 6.5280 0.000 6.5280 0.000
6.5440 2 6.7820 474 6.5440 0.000 6.5440 0.000						6.5440 1 6.6363 6 6.5440 0.000 6.5440 0.000						6.5440 5 6.6753 5 6.5440 0.000 6.5440 0.000
6.5600 4 6.7980 671 6.5600 0.000 6.5600 0.000						6.5600 3 6.6523 9 6.5600 0.000 6.5600 0.000						6.5600 3 6.6913 9 6.5600 0.000 6.5600 0.000
6.5760 3 6.8140 883 6.5760 0.000 6.5760 0.000						6.5760 4 6.6683 8 6.5760 0.000 6.5760 0.000						6.5760 6 6.7073 22 6.5760 0.000 6.5760 0.000
6.5920 3 6.8300 1284 6.5920 0.000 6.5920 0.000						6.5920 1 6.6843 19 6.5920 0.000 6.5920 0.000						6.5920 2 6.7233 28 6.5920 0.000 6.5920 0.000
6.6080 2 6.8460 1684 6.6080 0.000 6.6080 0.000						6.6080 3 6.7003 25 6.6080 0.000 6.6080 0.000						6.6080 3 6.7393 54 6.6080 0.000 6.6080 0.000
6.6240 6 6.8620 2144 6.6240 0.000 6.6240 0.000						6.6240 4 6.7163 39 6.6240 0.000 6.6240 0.000						6.6240 1 6.7553 90 6.6240 0.000 6.6240 0.000
6.6400 3 6.8780 2811 6.6400 0.000 6.6400 0.000						6.6400 5 6.7323 71 6.6400 0.000 6.6400 0.000						6.6400 5 6.7713 159 6.6400 0.000 6.6400 0.000
6.6560 3 6.8940 3567 6.6560 0.000 6.6560 0.000						6.6560 3 6.7483 148 6.6560 0.000 6.6560 0.000						6.6560 7 6.7873 262 6.6560 0.000 6.6560 0.000
6.6720 6 6.9100 4415 6.6720 0.000 6.6720 0.000						6.6720 8 6.7643 236 6.6720 0.000 6.6720 0.000						6.6720 2 6.8033 420 6.6720 0.000 6.6720 0.000
6.6880 8 6.9260 5455 6.6880 0.000 6.6880 0.000						6.6880 9 6.7803 389 6.6880 0.000 6.6880 0.000						6.6880 4 6.8193 691 6.6880 0.000 6.6880 0.000
6.7040 4 6.9420 6662 6.7040 0.000 6.7040 0.000						6.7040 9 6.7963 546 6.7040 0.000 6.7040 0.000						6.7040 7 6.8353 873 6.7040 0.000 6.7040 0.000
6.7200 16 6.9580 7818 6.7200 0.000 6.7200 0.000						6.7200 6 6.8123 786 6.7200 0.000 6.7200 0.000						6.7200 14 6.8513 1268 6.7200 0.000 6.7200 0.000
6.7360 16 6.9740 8907 6.7360 0.000 6.7360 0.000						6.7360 20 6.8283 1122 6.7360 0.000 6.7360 0.000						6.7360 15 6.8673 1618 6.7360 0.000 6.7360 0.000
6.7520 28 6.9900 9626 6.7520 0.000 6.7520 0.000						6.7520 27 6.8443 1519 6.7520 0.000 6.7520 0.000						6.7520 27 6.8833 2172 6.7520 0.000 6.7520 0.000
6.7680 49 7.0060 10000 6.7680 0.000 6.7680 0.000						6.7680 42 6.8603 2000 6.7680 0.000 6.7680 0.000						6.7680 36 6.8993 2724 6.7680 0.000 6.7680 0.000
6.7840 77 7.0220 9807 6.7840 0.000 6.7840 0.000						6.7840 60 6.8763 2607 6.7840 0.000 6.7840 0.000						6.7840 62 6.9153 3553 6.7840 0.000 6.7840 0.000
6.8000 138 7.0380 8978 6.8000 0.000 6.8000 0.000						6.8000 93 6.8923 3337 6.8000 0.000 6.8000 0.000						6.8000 75 6.9313 4365 6.8000 0.000 6.8000 0.000
6.8160 179 7.0540 7903 6.8160 0.000 6.8160 0.000						6.8160 137 6.9083 4175 6.8160 0.000 6.8160 0.000						6.8160 137 6.9473 5472 6.8160 0.000 6.8160 0.000
6.8320 257 7.0700 6662 6.8320 0.000 6.8320 0.000						6.8320 227 6.9243 5238 6.8320 0.000 6.8320 0.000						6.8320 219 6.9633 6508 6.8320 0.000 6.8320 0.000
6.8480 403 7.0860 5293 6.8480 0.000 6.8480 0.000						6.8480 344 6.9403 6397 6.8480 0.000 6.8480 0.000						6.8480 320 6.9793 7678 6.8480 0.000 6.8480 0.000
6.8640 568 7.1020 4149 6.8640 640.778 6.8640 -3.048						6.8640 557 6.9563 7514 6.8640 587.987 6.8640 -1.311						6.8640 395 6.9953 8734 6.8640 425.151 6.8640 -1.513
6.8800 849 7.1180 3172 6.8800 883.964 6.8800 -1.199						6.8800 781 6.9723 8784 6.8800 822.548 6.8800 -1.485						6.8800 566 7.0113 9540 6.8800 599.459 6.8800 -1.404
6.8960 1083 7.1340 2447 6.8960 1191.741 6.8960 -3.304						6.8960 1029 6.9883 9596 6.8960 1121.086 6.8960 -2.871						6.8960 774 7.0273 10000 6.8960 820.505 6.8960 -1.669
6.9120 1541 7.1500 1845 6.9120 1572.772 6.9120 -0.809						6.9120 1447 7.0043 10000 6.9120 1494.929 6.9120 -1.260						6.9120 1076 7.0433 9584 6.9120 1106.925 6.9120 -0.943
6.9280 1953 7.1660 1459 6.9280 2042.916 6.9280 -2.035						6.9280 1955 7.0203 9984 6.9280 1960.577 6.9280 -0.126						6.9280 1476 7.0593 9160 6.9280 1462.224 6.9280 0.359
6.9440 2614 7.1820 1111 6.9440 2613.825 6.9440 0.003						6.9440 2540 7.0363 9206 6.9440 2523.158 6.9440 0.334						6.9440 1831 7.0753 8005 6.9440 1905.906 6.9440 -1.751
6.9600 3298 7.1980 808 6.9600 3280.628 6.9600 0.303						6.9600 3204 7.0523 8178 6.9600 3182.475 6.9600 0.380						6.9600 2456 7.0913 6726 6.9600 2438.024 6.9600 0.363
6.9760 4125 7.2140 638 6.9760 4034.104 6.9760 1.415						6.9760 3945 7.0683 6899 6.9760 3939.197 6.9760 0.092						6.9760 3071 7.1073 5347 6.9760 3066.076 6.9760 0.089
6.9920 4909 7.2300 511 6.9920 4842.650 6.9920 0.947						6.9920 4876 7.0843 5677 6.9920 4754.414 6.9920 1.741						6.9920 3899 7.1233 4279 6.9920 3784.291 6.9920 1.837
7.0080 5860 7.2460 386 7.0080 5674.324 7.0080 2.426						7.0080 5746 7.1003 4412 7.0080 5592.475 7.0080 2.025						7.0080 4669 7.1393 3310 7.0080 4573.243 7.0080 1.401
7.0240 6583 7.2620 318 7.0240 6479.958 7.0240 1.270						7.0240 6427 7.1163 3459 7.0240 6410.331 7.0240 0.208						7.0240 5389 7.1553 2533 7.0240 5404.627 7.0240 -0.213
7.0400 7162 7.2780 292 7.0400 7209.467 7.0400 -0.561						7.0400 7292 7.1323 2605 7.0400 7152.541 7.0400 1.633						7.0400 6288 7.1713 1835 7.0400 6212.454 7.0400 0.953
7.0560 7920 7.2940 245 7.0560 7842.972 7.0560 0.866						7.0560 7708 7.1483 2023 7.0560 7797.885 7.0560 -1.024						7.0560 6924 7.1873 1432 7.0560 6980.684 7.0560 -0.681
7.0720 8479 7.3100 182 7.0720 8367.050 7.0720 1.216						7.0720 8415 7.1643 1516 7.0720 8331.263 7.0720 0.913						7.0720 7709 7.2033 1123 7.0720 7659.554 7.0720 0.563
7.0880 9031 7.3260 161 7.0880 8774.854 7.0880 2.695						7.0880 8694 7.1803 1192 7.0880 8756.110 7.0880 -0.666						7.0880 8202 7.2193 830 7.0880 8227.976 7.0880 -0.287
7.1040 9426 7.3420 115 7.1040 9085.383 7.1040 3.508						7.1040 9013 7.1963 915 7.1040 9076.228 7.1040 -0.666						7.1040 8781 7.2353 657 7.1040 8677.386 7.1040 1.106
7.1200 9644 7.3580 110 7.1200 9314.111 7.1200 3.359						7.1200 9438 7.2123 712 7.1200 9314.756 7.1200 1.269						7.1200 8983 7.2513 522 7.1200 9027.674 7.1200 -0.471
7.1360 9757 7.3740 96 7.1360 9481.475 7.1360 2.789						7.1360 9725 7.2283 545 7.1360 9484.012 7.1360 2.444						7.1360 9439 7.2673 440 7.1360 9291.523 7.1360 1.518
7.1520 9737 7.3900 88 7.1520 9599.154 7.1520 1.397						7.1520 9654 7.2443 448 7.1520 9603.847 7.1520 0.510						7.1520 9479 7.2833 310 7.1520 9484.127 7.1520 -0.053
7.1680 9812 7.4060 71 7.1680 9683.891 7.1680 1.293						7.1680 9908 7.2603 343 7.1680 9683.079 7.1680 2.260						7.1680 9593 7.2993 283 7.1680 9614.575 7.1680 -0.220
7.1840 10000 7.4220 75 7.1840 9739.114 7.1840 2.609						7.1840 9907 7.2763 288 7.1840 9734.970 7.1840 1.728						7.1840 9874 7.3153 220 7.1840 9704.619 7.1840 1.705
7.2000 9957 7.4380 63 7.2000 9769.687 7.2000 1.877						7.2000 10000 7.2923 227 7.2000 9764.225 7.2000 2.358						7.2000 10000 7.3313 203 7.2000 9766.077 7.2000 2.339
7.2160 9861 7.4540 44 7.2160 9786.099 7.2160 0.754						7.2160 9932 7.3083 185 7.2160 9776.569 7.2160 1.560						7.2160 9974 7.3473 141 7.2160 9801.829 7.2160 1.724
7.2320 9893 7.4700 51 7.2320 9791.641 7.2320 1.019						7.2320 9869 7.3243 151 7.2320 9775.854 7.2320 0.938						7.2320 9880 7.3633 158 7.2320 9820.437 7.2320 0.599
7.2480 9919 7.4860 56 7.2480 9787.097 7.2480 1.324						7.2480 9770 7.3403 142 7.2480 9766.628 7.2480 0.034						7.2480 9975 7.3793 131 7.2480 9826.697 7.2480 1.485
7.2640 9721 7.5020 65 7.2640 9777.206 7.2640 -0.570						7.2640 9734 7.3563 117 7.2640 9749.384 7.2640 -0.156						7.2640 9647 7.3953 106 7.2640 9824.943 7.2640 -1.812
7.2800 9874 7.5180 51 7.2800 9764.914 7.2800 1.098						7.2800 9626 7.3723 122 7.2800 9727.360 7.2800 -1.033						7.2800 9771 7.4113 98 7.2800 9812.884 7.2800 -0.424
7.2960 9925 7.5340 56 7.2960 9748.489 7.2960 1.772						7.2960 9769 7.3883 77 7.2960 9700.556 7.2960 0.692						7.2960 9915 7.4273 88 7.2960 9796.721 7.2960 1.188
7.3120 9709 7.5500 46 7.3120 9727.188 7.3120 -0.185						7.3120 9695 7.4043 71 7.3120 9670.410 7.3120 0.250						7.3120 9805 7.4433 70 7.3120 9775.854 7.3120 0.294
7.3280 9829 7.5660 48 7.3280 9703.908 7.3280 1.262						7.3280 9783 7.4203 85 7.3280 9637.965 7.3280 1.466						7.3280 9678 7.4593 65 7.3280 9752.793 7.3280 -0.760
7.3440 9771 7.5820 50 7.3440 9677.216 7.3440 0.949						7.3440 9609 7.4363 66 7.3440 9604.574 7.3440 0.045						7.3440 9684 7.4753 55 7.3440 9725.303 7.3440 -0.420
7.3600 9651 7.5980 47 7.3600 9650.097 7.3600 0.009						7.3600 9640 7.4523 63 7.3600 9569.772 7.3600 0.715						7.3600 9627 7.4913 41 7.3600 9697.979 7.3600 -0.723
7.3760 9530 7.6140 47 7.3760 9621.941 7.3760 -0.942						7.3760 9482 7.4683 44 7.3760 9534.569 7.3760 -0.540						7.3760 9786 7.5073 33 7.3760 9669.232 7.3760 1.180
7.3920 9684 7.6300 34 7.3920 9593.109 7.3920 0.924						7.3920 9630 7.4843 44 7.3920 9496.418 7.3920 1.361						7.3920 9533 7.5233 46 7.3920 9638.420 7.3920 -1.080
7.4080 9466 7.6460 43 7.4080 9563.147 7.4080 -0.999						7.4080 9507 7.5003 57 7.4080 9458.316 7.4080 0.499						7.4080 9595 7.5393 43 7.4080 9606.744 7.4080 -0.120
7.4240 9443 7.6620 42 7.4240 9533.466 7.4240 -0.931						7.4240 9376 7.5163 48 7.4240 9420.940 7.4240 -0.464						7.4240 9515 7.5553 42 7.4240 9574.375 7.4240 -0.609
7.4400 9347 7.6780 49 7.4400 9502.792 7.4400 -1.611						7.4400 9265 7.5323 41 7.4400 9382.411 7.4400 -1.220						7.4400 9612 7.5713 48 7.4400 9540.734 7.4400 0.727
7.4560 9604 7.6940 34 7.4560 9470.878 7.4560 1.358						7.4560 9242 7.5483 42 7.4560 9343.480 7.4560 -1.056						7.4560 9622 7.5873 46 7.4560 9506.571 7.4560 1.177
7.4720 9364 7.7100 42 7.4720 9439.652 7.4720 -0.782						7.4720 9239 7.5643 57 7.4720 9303.464 7.4720 -0.671						7.4720 9329 7.6033 30 7.4720 9471.778 7.4720 -1.478
7.4880 9436 7.7260 48 7.4880 9409.005 7.4880 0.278						7.4880 9250 7.5803 53 7.4880 9263.883 7.4880 -0.144						7.4880 9503 7.6193 34 7.4880 9435.997 7.4880 0.687
7.5040 9255 7.7420 48 7.5040 9378.993 7.5040 -1.289						7.5040 9134 7.5963 41 7.5040 9225.165 7.5040 -0.954						7.5040 9388 7.6353 47 7.5040 9399.568 7.5040 -0.119
7.5200 9317 7.7580 53 7.5200 9348.092 7.5200 -0.322						7.5200 9298 7.6123 33 7.5200 9185.886 7.5200 1.163						7.5200 9317 7.6513 34 7.5200 9364.032 7.5200 -0.487
7.5360 9303 7.7740 47 7.5360 9317.568 7.5360 -0.151						7.5360 9068 7.6283 55 7.5360 9146.337 7.5360 -0.823						7.5360 9332 7.6673 43 7.5360 9328.669 7.5360 0.034
7.5520 9281 7.7900 41 7.5520 9286.426 7.5520 -0.056						7.5520 8999 7.6443 41 7.5520 9107.330 7.5520 -1.142						7.5520 9236 7.6833 42 7.5520 9293.330 7.5520 -0.597
7.5680 9245 7.8060 47 7.5680 9255.563 7.5680 -0.110						7.5680 9005 7.6603 43 7.5680 9069.415 7.5680 -0.679						7.5680 9217 7.6993 40 7.5680 9258.526 7.5680 -0.433
7.5840 9289 7.8220 66 7.5840 9224.928 7.5840 0.665						7.5840 9070 7.6763 36 7.5840 9031.167 7.5840 0.408						7.5840 9013 7.7153 52 7.5840 9223.837 7.5840 -2.221
7.6000 9017 7.8380 60 7.6000 9194.176 7.6000 -1.866						7.6000 8747 7.6923 38 7.6000 8992.136 7.6000 -2.621						7.6000 9246 7.7313 44 7.6000 9188.164 7.6000 0.601
7.6160 9027 7.8540 58 7.6160 9163.396 7.6160 -1.436						7.6160 8937 7.7083 47 7.6160 8953.184 7.6160 -0.171						7.6160 9083 7.7473 43 7.6160 9152.626 7.6160 -0.731
7.6320 9215 7.8700 71 7.6320 9131.847 7.6320 0.866						7.6320 8793 7.7243 38 7.6320 8915.591 7.6320 -1.307						7.6320 9149 7.7633 43 7.6320 9118.190 7.6320 0.322
7.6480 9139 7.8860 76 7.6480 9101.071 7.6480 0.397						7.6480 8777 7.7403 38 7.6480 8877.277 7.6480 -1.070						7.6480 9110 7.7793 48 7.6480 9083.241 7.6480 0.280
7.6640 8985 7.9020 84 7.6640 9070.403 7.6640 -0.901						7.6640 8851 7.7563 47 7.6640 8839.130 7.6640 0.126						7.6640 9283 7.7953 41 7.6640 9048.818 7.6640 2.431
7.6800 9065 7.9180 89 7.6800 9040.210 7.6800 0.260						7.6800 8723 7.7723 45 7.6800 8800.728 7.6800 -0.832						7.6800 8927 7.8113 42 7.6800 9014.628 7.6800 -0.927
7.6960 8924 7.9340 103 7.6960 9009.084 7.6960 -0.901						7.6960 8738 7.7883 42 7.6960 8762.810 7.6960 -0.265						7.6960 8922 7.8273 54 7.6960 8980.424 7.6960 -0.619
7.7120 8942 7.9500 86 7.7120 8978.729 7.7120 -0.388						7.7120 8656 7.8043 54 7.7120 8725.481 7.7120 -0.747						7.7120 8982 7.8433 48 7.7120 8947.143 7.7120 0.368
7.7280 8998 7.9660 88 7.7280 8948.931 7.7280 0.517						7.7280 8672 7.8203 66 7.7280 8687.723 7.7280 -0.169						7.7280 8881 7.8593 46 7.7280 8913.666 7.7280 -0.347
7.7440 8944 7.9820 123 7.7440 8919.290 7.7440 0.261						7.7440 8804 7.8363 67 7.7440 8650.312 7.7440 1.638						7.7440 8996 7.8753 63 7.7440 8880.117 7.7440 1.222
7.7600 8870 7.9980 115 7.7600 8890.065 7.7600 -0.213						7.7600 8856 7.8523 77 7.7600 8613.627 7.7600 2.576						7.7600 8841 7.8913 67 7.7600 8846.687 7.7600 -0.060
7.7760 8830 8.0140 105 7.7760 8860.432 7.7760 -0.324						7.7760 8549 7.8683 76 7.7760 8576.914 7.7760 -0.302						7.7760 8843 7.9073 75 7.7760 8813.735 7.7760 0.311
7.7920 8749 8.0300 111 7.7920 8830.516 7.7920 -0.871						7.7920 8485 7.8843 56 7.7920 8540.405 7.7920 -0.601						7.7920 8876 7.9233 73 7.7920 8780.531 7.7920 1.013
7.8080 8849 8.0460 119 7.8080 8801.354 7.8080 0.507						7.8080 8535 7.9003 90 7.8080 8505.094 7.8080 0.324						7.8080 8741 7.9393 85 7.8080 8747.407 7.8080 -0.069
7.8240 8769 8.0620 110 7.8240 8773.653 7.8240 -0.050						7.8240 8735 7.9163 72 7.8240 8470.758 7.8240 2.827						7.8240 8751 7.9553 95 7.8240 8715.254 7.8240 0.382
7.8400 8693 8.0780 109 7.8400 8745.581 7.8400 -0.564						7.8400 8581 7.9323 101 7.8400 8436.840 7.8400 1.556						7.8400 8657 7.9713 83 7.8400 8683.038 7.8400 -0.280
7.8560 8647 8.0940 95 7.8560 8717.594 7.8560 -0.759						7.8560 8202 7.9483 86 7.8560 8403.719 7.8560 -2.227						7.8560 8635 7.9873 108 7.8560 8650.711 7.8560 -0.169
7.8720 8527 8.1100 77 7.8720 8690.730 7.8720 -1.773						7.8720 8370 7.9643 87 7.8720 8370.284 7.8720 -0.003						7.8720 8579 8.0033 98 7.8720 8619.640 7.8720 -0.439
7.8880 8521 8.1260 72 7.8880 8664.420 7.8880 -1.554						7.8880 8280 7.9803 92 7.8880 8336.345 7.8880 -0.619						7.8880 8505 8.0193 87 7.8880 8589.271 7.8880 -0.914
7.9040 8648 8.1420 59 7.9040 8638.854 7.9040 0.098						7.9040 8213 7.9963 101 7.9040 8304.458 7.9040 -1.009						7.9040 8497 8.0353 88 7.9040 8559.642 7.9040 -0.680
7.9200 8733 8.1580 57 7.9200 8613.897 7.9200 1.274						7.9200 8305 8.0123 129 7.9200 8272.094 7.9200 0.361						7.9200 8404 8.0513 91 7.9200 8530.141 7.9200 -1.376
7.9360 8516 8.1740 49 7.9360 8589.899 7.9360 -0.801						7.9360 8197 8.0283 131 7.9360 8241.503 7.9360 -0.492						7.9360 8362 8.0673 95 7.9360 8501.542 7.9360 -1.526
7.9520 8533 8.1900 47 7.9520 8564.735 7.9520 -0.344						7.9520 8336 8.0443 109 7.9520 8210.073 7.9520 1.379						7.9520 8328 8.0833 98 7.9520 8473.956 7.9520 -1.599
7.9680 8529 8.2060 23 7.9680 8540.175 7.9680 -0.121						7.9680 8049 8.0603 93 7.9680 8178.951 7.9680 -1.448						7.9680 8393 8.0993 91 7.9680 8445.844 7.9680 -0.577
7.9840 8432 8.2220 23 7.9840 8518.237 7.9840 -0.939						7.9840 8099 8.0763 88 7.9840 8148.478 7.9840 -0.550						7.9840 8384 8.1153 98 7.9840 8419.336 7.9840 -0.386
8.0000 8345 8.2380 22 8.0000 8495.674 8.0000 -1.649						8.0000 8037 8.0923 95 8.0000 8119.292 8.0000 -0.918						8.0000 8265 8.1313 88 8.0000 8392.701 8.0000 -1.405
8.0160 8421 8.2540 17 8.0160 8472.504 8.0160 -0.561						8.0160 7909 8.1083 93 8.0160 8092.137 8.0160 -2.059						8.0160 8479 8.1473 83 8.0160 8365.249 8.0160 1.235
8.0320 8320 8.2700 11 8.0320 8449.949 8.0320 -1.425						8.0320 8029 8.1243 93 8.0320 8064.801 8.0320 -0.400						8.0320 8339 8.1633 73 8.0320 8337.781 8.0320 0.013
8.0480 8260 8.2860 12 8.0480 8427.978 8.0480 -1.848						8.0480 7894 8.1403 84 8.0480 8035.811 8.0480 -1.596						8.0480 8417 8.1793 58 8.0480 8310.648 8.0480 1.159
8.0640 8486 8.3020 9 8.0640 8405.399 8.0640 0.875						8.0640 7919 8.1563 57 8.0640 8005.790 8.0640 -0.975						8.0640 8244 8.1953 37 8.0640 8283.953 8.0640 -0.440
8.0800 8352 8.3180 7 8.0800 8382.680 8.0800 -0.336						8.0800 7859 8.1723 47 8.0800 7975.710 8.0800 -1.317						8.0800 8161 8.2113 45 8.0800 8257.643 8.0800 -1.070
8.0960 8303 8.3340 14 8.0960 8358.805 8.0960 -0.612						8.0960 7864 8.1883 44 8.0960 7946.191 8.0960 -0.927						8.0960 8138 8.2273 26 8.0960 8231.017 8.0960 -1.031
8.1120 8288 8.3500 4 8.1120 8333.614 8.1120 -0.501						8.1120 7882 8.2043 38 8.1120 7916.672 8.1120 -0.391						8.1120 8182 8.2433 26 8.1120 8204.852 8.1120 -0.253
8.1280 8313 8.3660 5 8.1280 8308.003 8.1280 0.055						8.1280 7996 8.2203 34 8.1280 7887.108 8.1280 1.218						8.1280 8209 8.2593 23 8.1280 8178.238 8.1280 0.340
8.1440 8415 8.3820 7 8.1440 8281.487 8.1440 1.455						8.1440 7745 8.2363 20 8.1440 7856.544 8.1440 -1.267						8.1440 8289 8.2753 16 8.1440 8151.216 8.1440 1.513
8.1600 8330 8.3980 2 8.1600 8254.832 8.1600 0.824						8.1600 7681 8.2523 12 8.1600 7824.128 8.1600 -1.633						8.1600 8042 8.2913 10 8.1600 8123.534 8.1600 -0.909
8.1760 8078 8.4140 5 8.1760 8227.651 8.1760 -1.665						8.1760 7716 8.2683 13 8.1760 7791.135 8.1760 -0.855						8.1760 8005 8.3073 15 8.1760 8094.767 8.1760 -1.003
8.1920 8117 8.4300 3 8.1920 8200.166 8.1920 -0.923						8.1920 7572 8.2843 15 8.1920 7757.972 8.1920 -2.137						8.1920 7844 8.3233 11 8.1920 8064.420 8.1920 -2.489
8.2080 8080 8.4460 4 8.2080 8170.980 8.2080 -1.012						8.2080 7607 8.3003 9 8.2080 7724.480 8.2080 -1.347						8.2080 7994 8.3393 7 8.2080 8034.369 8.2080 -0.452
8.2240 8044 8.4620 7 8.2240 8141.888 8.2240 -1.091						8.2240 7672 8.3163 8 8.2240 7690.597 8.2240 -0.212						8.2240 7922 8.3553 8 8.2240 8003.290 8.2240 -0.913
8.2400 8172 8.4780 3 8.2400 8112.771 8.2400 0.655						8.2400 7521 8.3323 9 8.2400 7655.778 8.2400 -1.554						8.2400 7944 8.3713 9 8.2400 7972.000 8.2400 -0.314
8.2560 8070 8.4940 4 8.2560 8083.319 8.2560 -0.148						8.2560 7438 8.3483 7 8.2560 7620.604 8.2560 -2.117						8.2560 7946 8.3873 6 8.2560 7940.634 8.2560 0.060
8.2720 8162 8.5100 4 8.2720 8053.533 8.2720 1.201						8.2720 7486 8.3643 6 8.2720 7585.694 8.2720 -1.152						8.2720 7917 8.4033 4 8.2720 7908.867 8.2720 0.091
8.2880 7982 8.5260 4 8.2880 8023.895 8.2880 -0.469						8.2880 7532 8.3803 8 8.2880 7550.955 8.2880 -0.218						8.2880 7837 8.4193 10 8.2880 7876.698 8.2880 -0.448
8.3040 7840 8.5420 3 8.3040 7994.117 8.3040 -1.741						8.3040 7542 8.3963 3 8.3040 7515.954 8.3040 0.300						8.3040 7826 8.4353 5 8.3040 7844.894 8.3040 -0.214
8.3200 7827 8.5580 2 8.3200 7964.367 8.3200 -1.553						8.3200 7197 8.4123 3 8.3200 7481.063 8.3200 -3.348						8.3200 7813 8.4513 4 8.3200 7813.037 8.3200 -0.000
8.3360 7907 8.5740 2 8.3360 7935.141 8.3360 -0.316						8.3360 7386 8.4283 3 8.3360 7446.356 8.3360 -0.702						8.3360 7749 8.4673 1 8.3360 7780.967 8.3360 -0.363
8.3520 7786 8.5900 4 8.3520 7905.280 8.3520 -1.352						8.3520 7401 8.4443 0 8.3520 7411.653 8.3520 -0.124						8.3520 7768 8.4833 2 8.3520 7749.026 8.3520 0.215
8.3680 7803 8.6060 2 8.3680 7875.620 8.3680 -0.822						8.3680 7315 8.4603 3 8.3680 7377.079 8.3680 -0.726						8.3680 7678 8.4993 4 8.3680 7717.303 8.3680 -0.449
8.3840 7644 8.6220 0 8.3840 7846.163 8.3840 -2.312						8.3840 7211 8.4763 3 8.3840 7342.694 8.3840 -1.551						8.3840 7688 8.5153 5 8.3840 7685.522 8.3840 0.028
8.4000 7696 8.6380 1 8.4000 7816.466 8.4000 -1.373						8.4000 7369 8.4923 3 8.4000 7308.131 8.4000 0.709						8.4000 7631 8.5313 2 8.4000 7653.683 8.4000 -0.260
8.4160 7767 8.6540 4 8.4160 7787.078 8.4160 -0.228						8.4160 7358 8.5083 5 8.4160 7273.723 8.4160 0.982						8.4160 7688 8.5473 4 8.4160 7622.348 8.4160 0.749
8.4320 7604 8.6700 3 8.4320 7757.654 8.4320 -1.762						8.4320 7225 8.5243 6 8.4320 7239.411 8.4320 -0.170						8.4320 7530 8.5633 1 8.4320 7590.907 8.4320 -0.702
8.4480 7771 8.6860 1 8.4480 7728.440 8.4480 0.483						8.4480 7271 8.5403 5 8.4480 7205.113 8.4480 0.773						8.4480 7495 8.5793 2 8.4480 7559.439 8.4480 -0.744
8.4640 7733 8.7020 5 8.4640 7699.512 8.4640 0.381						8.4640 7313 8.5563 4 8.4640 7171.168 8.4640 1.659						8.4640 7539 8.5953 4 8.4640 7527.877 8.4640 0.128
8.4800 7582 8.7180 0 8.4800 7670.397 8.4800 -1.015						8.4800 7246 8.5723 4 8.4800 7137.375 8.4800 1.276						8.4800 7550 8.6113 2 8.4800 7496.460 8.4800 0.616
8.4960 7491 8.7340 2 8.4960 7641.459 8.4960 -1.738						8.4960 7105 8.5883 2 8.4960 7103.774 8.4960 0.015						8.4960 7459 8.6273 2 8.4960 7465.326 8.4960 -0.073
8.5120 7577 8.7500 3 8.5120 7612.624 8.5120 -0.409						8.5120 7090 8.6043 4 8.5120 7070.477 8.5120 0.232						8.5120 7408 8.6433 1 8.5120 7434.423 8.5120 -0.307
8.5280 7569 8.7660 1 8.5280 7583.880 8.5280 -0.171						8.5280 7008 8.6203 3 8.5280 7037.376 8.5280 -0.351						8.5280 7442 8.6593 6 8.5280 7403.461 8.5280 0.447
8.5440 7426 8.7820 1 8.5440 7555.152 8.5440 -1.499						8.5440 7009 8.6363 4 8.5440 7004.337 8.5440 0.056						8.5440 7355 8.6753 3 8.5440 7372.708 8.5440 -0.206
8.5600 7546 8.7980 1 8.5600 7526.450 8.5600 0.225						8.5600 6838 8.6523 1 8.5600 6971.380 8.5600 -1.613						8.5600 7429 8.6913 2 8.5600 7341.914 8.5600 1.010
8.5760 7458 8.8140 2 8.5760 7497.871 8.5760 -0.462						8.5760 6924 8.6683 0 8.5760 6938.532 8.5760 -0.175						8.5760 7253 8.7073 1 8.5760 7311.260 8.5760 -0.684
8.5920 7340 8.8300 1 8.5920 7469.521 8.5920 -1.512						8.5920 6965 8.6843 1 8.5920 6905.738 8.5920 0.710						8.5920 7324 8.7233 1 8.5920 7280.886 8.5920 0.504
8.6080 7422 8.8460 2 8.6080 7441.100 8.6080 -0.222						8.6080 6802 8.7003 2 8.6080 6873.204 8.6080 -0.863						8.6080 7398 8.7393 3 8.6080 7250.537 8.6080 1.714
8.6240 7624 8.8620 1 8.6240 7412.640 8.6240 2.421						8.6240 6802 8.7163 1 8.6240 6840.770 8.6240 -0.470						8.6240 7283 8.7553 0 8.6240 7220.276 8.6240 0.735
8.6400 7141 8.8780 0 8.6400 7384.387 8.6400 -2.880						8.6400 6764 8.7323 3 8.6400 6808.489 8.6400 -0.541						8.6400 7249 8.7713 1 8.6400 7190.071 8.6400 0.692
8.6560 7294 8.8940 1 8.6560 7356.448 8.6560 -0.731						8.6560 6639 8.7483 0 8.6560 6776.133 8.6560 -1.683						8.6560 7141 8.7873 1 8.6560 7160.313 8.6560 -0.229
8.6720 7262 8.9100 2 8.6720 7328.511 8.6720 -0.780						8.6720 6796 8.7643 3 8.6720 6743.876 8.6720 0.632						8.6720 7247 8.8033 0 8.6720 7130.563 8.6720 1.368
8.6880 7262 8.9260 2 8.6880 7300.565 8.6880 -0.453						8.6880 6689 8.7803 3 8.6880 6711.851 8.6880 -0.279						8.6880 7153 8.8193 2 8.6880 7100.812 8.6880 0.617
8.7040 7154 8.9420 4 8.7040 7272.965 8.7040 -1.407						8.7040 6664 8.7963 1 8.7040 6680.016 8.7040 -0.196						8.7040 7076 8.8353 0 8.7040 7071.098 8.7040 0.058
8.7200 7112 8.9580 3 8.7200 7245.109 8.7200 -1.578						8.7200 6722 8.8123 1 8.7200 6648.297 8.7200 0.899						8.7200 7111 8.8513 0 8.7200 7041.488 8.7200 0.824
8.7360 7239 8.9740 3 8.7360 7217.512 8.7360 0.253						8.7360 6711 8.8283 1 8.7360 6616.793 8.7360 1.150						8.7360 7018 8.8673 4 8.7360 7012.136 8.7360 0.070
8.7520 7096 8.9900 2 8.7520 7190.065 8.7520 -1.117						8.7520 6631 8.8443 3 8.7520 6585.292 8.7520 0.561						8.7520 6996 8.8833 0 8.7520 6982.736 8.7520 0.159
8.7680 7387 9.0060 4 8.7680 7162.566 8.7680 2.611						8.7680 6594 8.8603 0 8.7680 6554.132 8.7680 0.491						8.7680 6883 8.8993 2 8.7680 6953.471 8.7680 -0.849
8.7840 7112 9.0220 3 8.7840 7135.164 8.7840 -0.275						8.7840 6592 8.8763 0 8.7840 6523.072 8.7840 0.849						8.7840 6986 8.9153 0 8.7840 6924.344 8.7840 0.738
8.8000 7125 9.0380 1 8.8000 7107.869 8.8000 0.203						8.8000 6633 8.8923 3 8.8000 6492.018 8.8000 1.731						8.8000 6999 8.9313 1 8.8000 6895.269 8.8000 1.240
8.8160 7066 9.0540 1 8.8160 7080.734 8.8160 -0.175						8.8160 6480 8.9083 2 8.8160 6461.104 8.8160 0.235						8.8160 6806 8.9473 0 8.8160 6866.431 8.8160 -0.733
8.8320 7000 9.0700 1 8.8320 7053.631 8.8320 -0.641						8.8320 6514 8.9243 0 8.8320 6430.368 8.8320 1.036						8.8320 6838 8.9633 0 8.8320 6837.611 8.8320 0.005
8.8480 7089 9.0860 0 8.8480 7026.687 8.8480 0.740						8.8480 6430 8.9403 3 8.8480 6399.844 8.8480 0.376						8.8480 6788 8.9793 0 8.8480 6808.875 8.8480 -0.253
8.8640 7012 9.1020 1 8.8640 6999.754 8.8640 0.146						8.8640 6404 8.9563 4 8.8640 6369.258 8.8640 0.434						8.8640 6881 8.9953 1 8.8640 6780.528 8.8640 1.211
8.8800 6881 9.1180 1 8.8800 6972.851 8.8800 -1.107						8.8800 6441 8.9723 0 8.8800 6338.869 8.8800 1.273						8.8800 6809 9.0113 0 8.8800 6752.096 8.8800 0.690
8.8960 6861 9.1340 1 8.8960 6946.128 8.8960 -1.028						8.8960 6237 8.9883 4 8.8960 6308.795 8.8960 -0.909						8.8960 6722 9.0273 1 8.8960 6723.847 8.8960 -0.023
8.9120 6881 9.1500 0 8.9120 6919.574 8.9120 -0.465						8.9120 6213 9.0043 4 8.9120 6278.751 8.9120 -0.834						8.9120 6731 9.0433 4 8.9120 6695.612 8.9120 0.431
8.9280 7028 9.1660 2 8.9280 6893.134 8.9280 1.609						8.9280 6264 9.0203 4 8.9280 6248.768 8.9280 0.192						8.9280 6612 9.0593 3 8.9280 6667.526 8.9280 -0.683
8.9440 6783 9.1820 3 8.9440 6866.928 8.9440 -1.019						8.9440 6148 9.0363 2 8.9440 6219.139 8.9440 -0.907						8.9440 6685 9.0753 1 8.9440 6639.505 8.9440 0.556
8.9600 6689 9.1980 0 8.9600 6840.739 8.9600 -1.855						8.9600 6107 9.0523 3 8.9600 6189.630 8.9600 -1.057						8.9600 6552 9.0913 0 8.9600 6611.582 8.9600 -0.736
8.9760 6809 9.2140 3 8.9760 6814.631 8.9760 -0.068						8.9760 6091 9.0683 4 8.9760 6160.067 8.9760 -0.885						8.9760 6601 9.1073 1 8.9760 6583.773 8.9760 0.212
8.9920 6850 9.2300 1 8.9920 6788.562 8.9920 0.742						8.9920 6128 9.0843 2 8.9920 6130.902 8.9920 -0.037						8.9920 6426 9.1233 1 8.9920 6556.146 8.9920 -1.624
9.0080 6675 9.2460 0 9.0080 6762.724 9.0080 -1.074						9.0080 6043 9.1003 1 9.0080 6101.869 9.0080 -0.757						9.0080 6475 9.1393 2 9.0080 6528.583 9.0080 -0.666
9.0240 6730 9.2620 1 9.0240 6736.882 9.0240 -0.084						9.0240 6158 9.1163 1 9.0240 6072.926 9.0240 1.084						9.0240 6466 9.1553 3 9.0240 6501.183 9.0240 -0.438
9.0400 6516 9.2780 1 9.0400 6710.980 9.0400 -2.415						9.0400 6051 9.1323 1 9.0400 6044.000 9.0400 0.090						9.0400 6379 9.1713 4 9.0400 6474.117 9.0400 -1.191
9.0560 6694 9.2940 1 9.0560 6685.170 9.0560 0.108						9.0560 6084 9.1483 0 9.0560 6015.291 9.0560 0.881						9.0560 6361 9.1873 2 9.0560 6447.147 9.0560 -1.080
9.0720 6558 9.3100 0 9.0720 6659.441 9.0720 -1.253						9.0720 5857 9.1643 1 9.0720 5986.737 9.0720 -1.695						9.0720 6490 9.2033 1 9.0720 6420.135 9.0720 0.867
9.0880 6709 9.3260 1 9.0880 6633.738 9.0880 0.919						9.0880 5877 9.1803 2 9.0880 5958.160 9.0880 -1.059						9.0880 6208 9.2193 1 9.0880 6393.129 9.0880 -2.350
9.1040 6522 9.3420 0 9.1040 6608.201 9.1040 -1.067						9.1040 5894 9.1963 2 9.1040 5929.644 9.1040 -0.464						9.1040 6441 9.2353 0 9.1040 6366.286 9.1040 0.931
9.1200 6667 9.3580 1 9.1200 6582.753 9.1200 1.032						9.1200 6030 9.2123 1 9.1200 5901.256 9.1200 1.658						9.1200 6179 9.2513 0 9.1200 6339.569 9.1200 -2.043
9.1360 6705 9.3740 0 9.1360 6557.386 9.1360 1.803						9.1360 5901 9.2283 1 9.1360 5872.976 9.1360 0.365						9.1360 6329 9.2673 3 9.1360 6313.031 9.1360 0.201
9.1520 6313 9.3900 1 9.1520 6532.053 9.1520 -2.757						9.1520 5798 9.2443 0 9.1520 5844.775 9.1520 -0.614						9.1520 6174 9.2833 0 9.1520 6286.687 9.1520 -1.434
9.1680 6524 9.4060 0 9.1680 6506.970 9.1680 0.211						9.1680 5807 9.2603 2 9.1680 5816.789 9.1680 -0.128						9.1680 6380 9.2993 1 9.1680 6260.539 9.1680 1.496
9.1840 6552 9.4220 0 9.1840 6482.019 9.1840 0.865						9.1840 5813 9.2763 1 9.1840 5788.994 9.1840 0.315						9.1840 6156 9.3153 1 9.1840 6234.378 9.1840 -0.999
9.2000 6307 9.4380 0 9.2000 6456.962 9.2000 -1.888						9.2000 5757 9.2923 0 9.2000 5761.304 9.2000 -0.057						9.2000 6050 9.3313 0 9.2000 6208.221 9.2000 -2.034
9.2160 6527 9.4540 0 9.2160 6432.198 9.2160 1.173						9.2160 5730 9.3083 1 9.2160 5733.672 9.2160 -0.049						9.2160 6122 9.3473 0 9.2160 6182.154 9.2160 -0.769
9.2320 6416 9.4700 0 9.2320 6407.361 9.2320 0.108						9.2320 5642 9.3243 1 9.2320 5706.145 9.2320 -0.854						9.2320 6150 9.3633 0 9.2320 6156.125 9.2320 -0.078
9.2480 6293 9.4860 1 9.2480 6382.547 9.2480 -1.129						9.2480 5757 9.3403 1 9.2480 5678.714 9.2480 1.032						9.2480 6134 9.3793 0 9.2480 6130.187 9.2480 0.049
9.2640 6317 9.5020 0 9.2640 6357.896 9.2640 -0.515						9.2640 5709 9.3563 0 9.2640 5651.520 9.2640 0.761						9.2640 6110 9.3953 0 9.2640 6104.559 9.2640 0.070
9.2800 6164 9.5180 1 9.2800 6333.331 9.2800 -2.157						9.2800 5813 9.3723 0 9.2800 5624.361 9.2800 2.474						9.2800 6142 9.4113 0 9.2800 6078.884 9.2800 0.805
9.2960 6296 9.5340 0 9.2960 6308.842 9.2960 -0.162						9.2960 5668 9.3883 1 9.2960 5597.277 9.2960 0.939						9.2960 6071 9.4273 1 9.2960 6053.331 9.2960 0.227
9.3120 6211 9.5500 1 9.3120 6284.375 9.3120 -0.931						9.3120 5544 9.4043 0 9.3120 5570.382 9.3120 -0.354						9.3120 5968 9.4433 0 9.3120 6027.899 9.3120 -0.775
9.3280 6130 9.5660 1 9.3280 6260.060 9.3280 -1.661						9.3280 5529 9.4203 0 9.3280 5543.608 9.3280 -0.196						9.3280 6017 9.4593 4 9.3280 6002.504 9.3280 0.187
9.3440 6229 9.5820 0 9.3440 6235.766 9.3440 -0.086						9.3440 5364 9.4363 0 9.3440 5516.934 9.3440 -2.088						9.3440 5990 9.4753 0 9.3440 5977.196 9.3440 0.165
9.3600 6079 9.5980 0 9.3600 6211.622 9.3600 -1.701						9.3600 5561 9.4523 0 9.3600 5490.314 9.3600 0.948						9.3600 5906 9.4913 1 9.3600 5951.992 9.3600 -0.598
9.3760 6170 9.6140 0 9.3760 6187.498 9.3760 -0.223						9.3760 5548 9.4683 0 9.3760 5463.833 9.3760 1.130						9.3760 5869 9.5073 1 9.3760 5926.892 9.3760 -0.756
9.3920 6280 9.6300 0 9.3920 6163.524 9.3920 1.470						9.3920 5520 9.4843 1 9.3920 5437.518 9.3920 1.110						9.3920 5940 9.5233 0 9.3920 5901.894 9.3920 0.494
9.4080 6249 9.6460 0 9.4080 6139.560 9.4080 1.384						9.4080 5337 9.5003 0 9.4080 5411.254 9.4080 -1.016						9.4080 5768 9.5393 0 9.4080 5876.999 9.4080 -1.435
9.4240 6136 9.6620 1 9.4240 6115.680 9.4240 0.259						9.4240 5614 9.5163 0 9.4240 5385.108 9.4240 3.055						9.4240 5834 9.5553 0 9.4240 5852.274 9.4240 -0.239
9.4400 5991 9.6780 0 9.4400 6091.884 9.4400 -1.303						9.4400 5461 9.5323 2 9.4400 5359.081 9.4400 1.379						9.4400 5846 9.5713 0 9.4400 5827.601 9.4400 0.241
9.4560 5960 9.6940 1 9.4560 6068.172 9.4560 -1.401						9.4560 5386 9.5483 0 9.4560 5333.169 9.4560 0.720						9.4560 5732 9.5873 0 9.4560 5803.283 9.4560 -0.942
9.4720 6304 9.7100 0 9.4720 6044.555 9.4720 3.268						9.4720 5273 9.5643 0 9.4720 5307.394 9.4720 -0.474						9.4720 5692 9.6033 0 9.4720 5778.863 9.4720 -1.151
9.4880 5992 9.7260 0 9.4880 6021.085 9.4880 -0.376						9.4880 5346 9.5803 1 9.4880 5281.781 9.4880 0.878						9.4880 5786 9.6193 1 9.4880 5754.542 9.4880 0.414
9.5040 5983 9.7420 0 9.5040 5997.633 9.5040 -0.189						9.5040 5227 9.5963 0 9.5040 5256.217 9.5040 -0.404						9.5040 5800 9.6353 0 9.5040 5730.337 9.5040 0.915
9.5200 6054 9.7580 0 9.5200 5974.329 9.5200 1.024						9.5200 5169 9.6123 0 9.5200 5230.808 9.5200 -0.860						9.5200 5718 9.6513 0 9.5200 5706.164 9.5200 0.157
9.5360 6009 9.7740 0 9.5360 5951.042 9.5360 0.748						9.5360 5252 9.6283 0 9.5360 5205.605 9.5360 0.640						9.5360 5685 9.6673 0 9.5360 5682.072 9.5360 0.039
9.5520 6016 9.7900 1 9.5520 5927.912 9.5520 1.136						9.5520 5315 9.6443 0 9.5520 5180.384 9.5520 1.846						9.5520 5763 9.6833 0 9.5520 5658.080 9.5520 1.382
9.5680 6093 9.8060 0 9.5680 5904.854 9.5680 2.410						9.5680 5181 9.6603 0 9.5680 5155.295 9.5680 0.357						9.5680 5686 9.6993 0 9.5680 5634.186 9.5680 0.687
9.5840 5833 9.8220 0 9.5840 5881.801 9.5840 -0.639						9.5840 5120 9.6763 0 9.5840 5130.365 9.5840 -0.145						9.5840 5588 9.7153 0 9.5840 5610.390 9.5840 -0.300
9.6000 5964 9.8380 0 9.6000 5858.831 9.6000 1.362						9.6000 5052 9.6923 1 9.6000 5105.481 9.6000 -0.752						9.6000 5677 9.7313 0 9.6000 5586.691 9.6000 1.199
9.6160 5820 9.8540 0 9.6160 5835.941 9.6160 -0.209						9.6160 5114 9.7083 0 9.6160 5080.709 9.6160 0.466						9.6160 5658 9.7473 1 9.6160 5563.159 9.6160 1.261
9.6320 5759 9.8700 0 9.6320 5813.132 9.6320 -0.713						9.6320 5072 9.7243 0 9.6320 5056.049 9.6320 0.224						9.6320 5653 9.7633 0 9.6320 5539.672 9.6320 1.507
9.6480 5883 9.8860 1 9.6480 5790.414 9.6480 1.207						9.6480 5189 9.7403 1 9.6480 5031.499 9.6480 2.186						9.6480 5610 9.7793 0 9.6480 5516.264 9.6480 1.251
9.6640 5976 9.9020 0 9.6640 5767.840 9.6640 2.693						9.6640 5254 9.7563 1 9.6640 5007.059 9.6640 3.407						9.6640 5573 9.7953 0 9.6640 5492.952 9.6640 1.072
9.6800 5699 9.9180 0 9.6800 5745.281 9.6800 -0.613						9.6800 5085 9.7723 0 9.6800 4982.749 9.6800 1.434						9.6800 5457 9.8113 0 9.6800 5469.736 9.6800 -0.172
9.6960 5718 9.9340 0 9.6960 5722.867 9.6960 -0.064						9.6960 5101 9.7883 1 9.6960 4958.594 9.6960 1.994						9.6960 5367 9.8273 0 9.6960 5446.616 9.6960 -1.087
9.7120 5715 9.9500 0 9.7120 5700.457 9.7120 0.192						9.7120 4963 9.8043 0 9.7120 4934.481 9.7120 0.405						9.7120 5533 9.8433 0 9.7120 5423.590 9.7120 1.471
9.7280 5662 9.9660 1 9.7280 5678.125 9.7280 -0.214						9.7280 4771 9.8203 0 9.7280 4910.497 9.7280 -2.020						9.7280 5354 9.8593 0 9.7280 5400.659 9.7280 -0.638
9.7440 5838 9.9820 1 9.7440 5655.873 9.7440 2.384						9.7440 4799 9.8363 0 9.7440 4886.687 9.7440 -1.266						9.7440 5430 9.8753 0 9.7440 5377.890 9.7440 0.707
9.7600 5618 9.9980 0 9.7600 5633.698 9.7600 -0.209						9.7600 4876 9.8523 0 9.7600 4862.964 9.7600 0.187						9.7600 5440 9.8913 0 9.7600 5355.164 9.7600 1.150
9.7760 5524 10.0140 0 9.7760 5611.613 9.7760 -1.179						9.7760 4901 9.8683 0 9.7760 4839.301 9.7760 0.881						9.7760 5416 9.9073 0 9.7760 5332.513 9.7760 1.134
9.7920 5535 10.0300 0 9.7920 5589.670 9.7920 -0.735						9.7920 4880 9.8843 1 9.7920 4815.791 9.7920 0.919						9.7920 5320 9.9233 0 9.7920 5309.956 9.7920 0.138
9.8080 5514 10.0460 0 9.8080 5567.729 9.8080 -0.724						9.8080 4949 9.9003 0 9.8080 4792.320 9.8080 2.227						9.8080 5219 9.9393 0 9.8080 5287.491 9.8080 -0.948
9.8240 5526 10.0620 0 9.8240 5545.866 9.8240 -0.267						9.8240 4819 9.9163 0 9.8240 4768.955 9.8240 0.721						9.8240 5135 9.9553 0 9.8240 5265.119 9.8240 -1.816
9.8400 5605 10.0780 1 9.8400 5524.080 9.8400 1.081						9.8400 4852 9.9323 0 9.8400 4745.694 9.8400 1.526						9.8400 5266 9.9713 0 9.8400 5242.838 9.8400 0.319
9.8560 5532 10.0940 0 9.8560 5502.371 9.8560 0.398						9.8560 4778 9.9483 0 9.8560 4722.539 9.8560 0.802						9.8560 5300 9.9873 0 9.8560 5220.649 9.8560 1.090
9.8720 5487 10.1100 0 9.8720 5480.748 9.8720 0.084						9.8720 4730 9.9643 1 9.8720 4699.506 9.8720 0.443						9.8720 5163 10.0033 0 9.8720 5198.551 9.8720 -0.495
9.8880 5502 10.1260 1 9.8880 5459.267 9.8880 0.576						9.8880 4598 9.9803 0 9.8880 4678.551 9.8880 -1.188						9.8880 5169 10.0193 0 9.8880 5176.543 9.8880 -0.105
9.9040 5561 10.1420 0 9.9040 5437.786 9.9040 1.652						9.9040 4751 9.9963 0 9.9040 4657.690 9.9040 1.354						9.9040 5145 10.0353 0 9.9040 5154.626 9.9040 -0.134
9.9200 5420 10.1580 1 9.9200 5416.381 9.9200 0.049						9.9200 4596 10.0123 0 9.9200 4636.923 9.9200 -0.604						9.9200 5087 10.0513 0 9.9200 5132.799 9.9200 -0.642
9.9360 5528 10.1740 0 9.9360 5395.051 9.9360 1.788						9.9360 4558 10.0283 0 9.9360 4616.249 9.9360 -0.863						9.9360 5063 10.0673 0 9.9360 5111.062 9.9360 -0.675
9.9520 5355 10.1900 0 9.9520 5373.807 9.9520 -0.257						9.9520 4662 10.0443 0 9.9520 4595.668 9.9520 0.971						9.9520 4993 10.0833 0 9.9520 5089.414 9.9520 -1.364
9.9680 5528 10.2060 0 9.9680 5352.713 9.9680 2.358						9.9680 4759 10.0603 0 9.9680 4575.179 9.9680 2.665						9.9680 5009 10.0993 0 9.9680 5067.855 9.9680 -0.832
9.9840 5292 10.2220 0 9.9840 5331.683 9.9840 -0.546						9.9840 4566 10.0763 0 9.9840 4554.783 9.9840 0.166						9.9840 5031 10.1153 0 9.9840 5046.384 9.9840 -0.217
10.0000 5429 10.2380 0 10.0000 5310.652 10.0000 1.606						10.0000 4546 10.0923 0 10.0000 4534.478 10.0000 0.171						10.0000 5007 10.1313 0 10.0000 5025.002 10.0000 -0.254
10.0160 5309 10.2540 0 10.0160 5289.696 10.0160 0.265						10.0160 4552 10.1083 0 10.0160 4514.264 10.0160 0.559						10.0160 5099 10.1473 0 10.0160 5003.707 10.0160 1.334
10.0320 5229 10.2700 0 10.0320 5268.813 10.0320 -0.551						10.0320 4507 10.1243 0 10.0320 4494.141 10.0320 0.192						10.0320 5010 10.1633 2 10.0320 4982.500 10.0320 0.389
10.0480 5318 10.2860 0 10.0480 5248.004 10.0480 0.960						10.0480 4501 10.1403 0 10.0480 4474.108 10.0480 0.401						10.0480 4921 10.1793 0 10.0480 4961.379 10.0480 -0.576
10.0640 5304 10.3020 0 10.0640 5227.278 10.0640 1.053						10.0640 4495 10.1563 0 10.0640 4454.165 10.0640 0.609						10.0640 4944 10.1953 0 10.0640 4940.346 10.0640 0.052
10.0800 5252 10.3180 0 10.0800 5206.690 10.0800 0.625						10.0800 4435 10.1723 0 10.0800 4434.312 10.0800 0.010						10.0800 4835 10.2113 0 10.0800 4919.398 10.0800 -1.214
10.0960 5379 10.3340 0 10.0960 5186.101 10.0960 2.630						10.0960 4447 10.1883 0 10.0960 4414.548 10.0960 0.487						10.0960 5031 10.2273 0 10.0960 4898.537 10.0960 1.868
10.1120 5257 10.3500 0 10.1120 5165.593 10.1120 1.261						10.1120 4465 10.2043 0 10.1120 4394.873 10.1120 1.049						10.1120 4846 10.2433 0 10.1120 4877.762 10.1120 -0.456
10.1280 5127 10.3660 0 10.1280 5145.223 10.1280 -0.255						10.1280 4433 10.2203 0 10.1280 4375.286 10.1280 0.867						10.1280 4839 10.2593 0 10.1280 4857.071 10.1280 -0.260
10.1440 5169 10.3820 0 10.1440 5124.860 10.1440 0.614						10.1440 4414 10.2363 1 10.1440 4355.788 10.1440 0.876						10.1440 4790 10.2753 0 10.1440 4836.466 10.1440 -0.671
10.1600 5263 10.3980 0 10.1600 5104.634 10.1600 2.183						10.1600 4254 10.2523 0 10.1600 4336.376 10.1600 -1.263						10.1600 4854 10.2913 0 10.1600 4816.081 10.1600 0.544
10.1760 5050 10.4140 1 10.1760 5084.404 10.1760 -0.484						10.1760 4407 10.2683 1 10.1760 4317.052 10.1760 1.355						10.1760 4823 10.3073 0 10.1760 4795.680 10.1760 0.393
10.1920 5190 10.4300 0 10.1920 5064.245 10.1920 1.746						10.1920 4402 10.2843 1 10.1920 4297.815 10.1920 1.570						10.1920 4749 10.3233 0 10.1920 4775.327 10.1920 -0.382
10.2080 5206 10.4460 0 10.2080 5044.158 10.2080 2.243						10.2080 4266 10.3003 1 10.2080 4278.664 10.2080 -0.194						10.2080 4827 10.3393 0 10.2080 4755.057 10.2080 1.035
10.2240 5126 10.4620 0 10.2240 5024.141 10.2240 1.423						10.2240 4220 10.3163 0 10.2240 4259.599 10.2240 -0.610						10.2240 4613 10.3553 1 10.2240 4734.871 10.2240 -1.794
10.2400 5189 10.4780 0 10.2400 5006.563 10.2400 2.533						10.2400 4311 10.3323 0 10.2400 4240.620 10.2400 1.072						10.2400 4794 10.3713 0 10.2400 4714.767 10.2400 1.144
10.2560 5055 10.4940 0 10.2560 4989.048 10.2560 0.928						10.2560 4177 10.3483 0 10.2560 4221.726 10.2560 -0.692						10.2560 4740 10.3873 0 10.2560 4694.746 10.2560 0.657
10.2720 5055 10.5100 0 10.2720 4971.594 10.2720 1.173						10.2720 4363 10.3643 0 10.2720 4202.917 10.2720 2.424						10.2720 4705 10.4033 0 10.2720 4674.807 10.2720 0.440
10.2880 4898 10.5260 0 10.2880 4954.202 10.2880 -0.803						10.2880 4358 10.3803 0 10.2880 4184.192 10.2880 2.633						10.2880 4661 10.4193 0 10.2880 4654.950 10.2880 0.089
10.3040 4978 10.5420 0 10.3040 4936.871 10.3040 0.583						10.3040 4194 10.3963 0 10.3040 4165.552 10.3040 0.439						10.3040 4668 10.4353 0 10.3040 4635.175 10.3040 0.480
10.3200 5050 10.5580 0 10.3200 4919.601 10.3200 1.835						10.3200 4252 10.4123 0 10.3200 4146.995 10.3200 1.610						10.3200 4639 10.4513 0 10.3200 4615.480 10.3200 0.345
10.3360 5111 10.5740 0 10.3360 4902.392 10.3360 2.918						10.3360 4208 10.4283 0 10.3360 4128.521 10.3360 1.225						10.3360 4560 10.4673 0 10.3360 4595.867 10.3360 -0.531
10.3520 5008 10.5900 0 10.3520 4885.243 10.3520 1.735						10.3520 4113 10.4443 0 10.3520 4110.131 10.3520 0.045						10.3520 4724 10.4833 0 10.3520 4576.402 10.3520 2.147
10.3680 4907 10.6060 0 10.3680 4868.155 10.3680 0.555						10.3680 4093 10.4603 0 10.3680 4091.823 10.3680 0.018						10.3680 4586 10.4993 0 10.3680 4556.967 10.3680 0.429
10.3840 4897 10.6220 0 10.3840 4851.128 10.3840 0.656						10.3840 4087 10.4763 0 10.3840 4073.598 10.3840 0.210						10.3840 4640 10.5153 0 10.3840 4537.594 10.3840 1.503
10.4000 5053 10.6380 0 10.4000 4834.161 10.4000 3.079						10.4000 4169 10.4923 0 10.4000 4055.454 10.4000 1.759						10.4000 4509 10.5313 0 10.4000 4518.300 10.4000 -0.139
10.4160 4866 10.6540 0 10.4160 4817.253 10.4160 0.699						10.4160 4132 10.5083 0 10.4160 4037.392 10.4160 1.472						10.4160 4533 10.5473 0 10.4160 4499.086 10.4160 0.504
10.4320 4877 10.6700 0 10.4320 4800.405 10.4320 1.097						10.4320 3975 10.5243 0 10.4320 4019.411 10.4320 -0.704						10.4320 4512 10.5633 0 10.4320 4479.951 10.4320 0.477
10.4480 4856 10.6860 0 10.4480 4783.616 10.4480 1.039						10.4480 3980 10.5403 0 10.4480 4001.511 10.4480 -0.341						10.4480 4432 10.5793 0 10.4480 4460.894 10.4480 -0.434
10.4640 4766 10.7020 0 10.4640 4766.887 10.4640 -0.013						10.4640 4063 10.5563 0 10.4640 3983.691 10.4640 1.244						10.4640 4535 10.5953 0 10.4640 4441.915 10.4640 1.382
10.4800 4936 10.7180 0 10.4800 4750.216 10.4800 2.644						10.4800 4029 10.5723 0 10.4800 3965.951 10.4800 0.993						10.4800 4354 10.6113 0 10.4800 4423.014 10.4800 -1.046
10.4960 4656 10.7340 0 10.4960 4733.604 10.4960 -1.137						10.4960 3897 10.5883 0 10.4960 3948.291 10.4960 -0.822						10.4960 4476 10.6273 0 10.4960 4404.917 10.4960 1.062
10.5120 4821 10.7500 0 10.5120 4717.051 10.5120 1.497						10.5120 3845 10.6043 0 10.5120 3930.710 10.5120 -1.382						10.5120 4438 10.6433 0 10.5120 4386.894 10.5120 0.767
10.5280 4662 10.7660 0 10.5280 4700.557 10.5280 -0.565						10.5280 3968 10.6203 1 10.5280 3913.209 10.5280 0.870						10.5280 4320 10.6593 0 10.5280 4368.945 10.5280 -0.745
10.5440 4674 10.7820 0 10.5440 4684.120 10.5440 -0.148						10.5440 3853 10.6363 0 10.5440 3895.786 10.5440 -0.689						10.5440 4378 10.6753 0 10.5440 4351.070 10.5440 0.407
10.5600 4637 10.7980 0 10.5600 4667.742 10.5600 -0.451						10.5600 3887 10.6523 0 10.5600 3878.441 10.5600 0.137						10.5600 4225 10.6913 0 10.5600 4333.269 10.5600 -1.666
10.5760 4659 10.8140 0 10.5760 4651.421 10.5760 0.111						10.5760 3933 10.6683 1 10.5760 3861.174 10.5760 1.145						10.5760 4478 10.7073 0 10.5760 4315.540 10.5760 2.428
10.5920 4612 10.8300 0 10.5920 4635.158 10.5920 -0.341						10.5920 3811 10.6843 0 10.5920 3843.984 10.5920 -0.534						10.5920 4332 10.7233 0 10.5920 4297.884 10.5920 0.518
10.6080 4791 10.8460 0 10.6080 4618.952 10.6080 2.486						10.6080 4009 10.7003 0 10.6080 3826.872 10.6080 2.876						10.6080 4201 10.7393 0 10.6080 4280.301 10.6080 -1.223
10.6240 4749 10.8620 0 10.6240 4602.803 10.6240 2.121						10.6240 3726 10.7163 0 10.6240 3809.836 10.6240 -1.373						10.6240 4341 10.7553 0 10.6240 4262.790 10.6240 1.187
10.6400 4565 10.8780 1 10.6400 4586.711 10.6400 -0.321						10.6400 3850 10.7323 0 10.6400 3792.877 10.6400 0.921						10.6400 4314 10.7713 0 10.6400 4245.350 10.6400 1.045
10.6560 4581 10.8940 0 10.6560 4570.676 10.6560 0.153						10.6560 3796 10.7483 0 10.6560 3775.995 10.6560 0.325						10.6560 4312 10.7873 0 10.6560 4227.982 10.6560 1.279
10.6720 4663 10.9100 0 10.6720 4554.698 10.6720 1.586						10.6720 3824 10.7643 0 10.6720 3759.188 10.6720 1.048						10.6720 4247 10.8033 0 10.6720 4210.686 10.6720 0.557
10.6880 4558 10.9260 0 10.6880 4538.776 10.6880 0.285						10.6880 3709 10.7803 0 10.6880 3742.456 10.6880 -0.549						10.6880 4199 10.8193 1 10.6880 4193.460 10.6880 0.085
10.7040 4642 10.9420 0 10.7040 4522.910 10.7040 1.748						10.7040 3739 10.7963 0 10.7040 3725.800 10.7040 0.216						10.7040 4246 10.8353 1 10.7040 4176.306 10.7040 1.070
10.7200 4515 10.9580 0 10.7200 4507.100 10.7200 0.118						10.7200 3729 10.8123 1 10.7200 3709.219 10.7200 0.324						10.7200 4214 10.8513 0 10.7200 4159.221 10.7200 0.844
10.7360 4595 10.9740 1 10.7360 4491.346 10.7360 1.529						10.7360 3688 10.8283 0 10.7360 3692.712 10.7360 -0.078						10.7360 4254 10.8673 0 10.7360 4142.207 10.7360 1.714
10.7520 4558 10.9900 0 10.7520 4475.647 10.7520 1.220						10.7520 3774 10.8443 0 10.7520 3676.279 10.7520 1.591						10.7520 4324 10.8833 0 10.7520 4125.263 10.7520 3.022
10.7680 4451 11.0060 0 10.7680 4460.004 10.7680 -0.135						10.7680 3629 10.8603 0 10.7680 3659.920 10.7680 -0.513						10.7680 4080 10.8993 0 10.7680 4108.388 10.7680 -0.444
10.7840 4663 11.0220 0 10.7840 4444.416 10.7840 3.201						10.7840 3713 10.8763 0 10.7840 3643.635 10.7840 1.138						10.7840 4182 10.9153 0 10.7840 4091.582 10.7840 1.398
10.8000 4490 11.0380 0 10.8000 4428.883 10.8000 0.912						10.8000 3532 10.8923 0 10.8000 3627.422 10.8000 -1.606						10.8000 4100 10.9313 0 10.8000 4074.846 10.8000 0.393
10.8160 4449 11.0540 0 10.8160 4413.404 10.8160 0.534						10.8160 3710 10.9083 0 10.8160 3611.282 10.8160 1.621						10.8160 4144 10.9473 0 10.8160 4058.178 10.8160 1.333
10.8320 4312 11.0700 0 10.8320 4397.980 10.8320 -1.309						10.8320 3540 10.9243 0 10.8320 3595.215 10.8320 -0.928						10.8320 4049 10.9633 0 10.8320 4041.579 10.8320 0.117
10.8480 4437 11.0860 0 10.8480 4382.611 10.8480 0.817						10.8480 3560 10.9403 0 10.8480 3579.220 10.8480 -0.322						10.8480 4027 10.9793 0 10.8480 4025.048 10.8480 0.031
10.8640 4324 11.1020 0 10.8640 4367.296 10.8640 -0.658						10.8640 3606 10.9563 0 10.8640 3563.297 10.8640 0.711						10.8640 3982 10.9953 0 10.8640 4008.585 10.8640 -0.421
10.8800 4512 11.1180 0 10.8800 4352.035 10.8800 2.381						10.8800 3538 10.9723 1 10.8800 3547.446 10.8800 -0.159						10.8800 3986 11.0113 0 10.8800 3992.189 10.8800 -0.098
10.8960 4439 11.1340 0 10.8960 4336.827 10.8960 1.534						10.8960 3556 10.9883 0 10.8960 3531.666 10.8960 0.408						10.8960 3981 11.0273 0 10.8960 3975.861 10.8960 0.081
10.9120 4318 11.1500 0 10.9120 4321.673 10.9120 -0.056						10.9120 3412 11.0043 0 10.9120 3515.956 10.9120 -1.780						10.9120 3952 11.0433 1 10.9120 3959.600 10.9120 -0.121
10.9280 4315 11.1660 0 10.9280 4306.573 10.9280 0.128						10.9280 3555 11.0203 0 10.9280 3500.317 10.9280 0.917						10.9280 3920 11.0593 0 10.9280 3943.405 10.9280 -0.374
10.9440 4434 11.1820 0 10.9440 4291.526 10.9440 2.140						10.9440 3482 11.0363 1 10.9440 3484.749 10.9440 -0.047						10.9440 4029 11.0753 0 10.9440 3927.277 10.9440 1.603
10.9600 4373 11.1980 0 10.9600 4276.532 10.9600 1.459						10.9600 3467 11.0523 0 10.9600 3469.250 10.9600 -0.038						10.9600 3941 11.0913 0 10.9600 3911.216 10.9600 0.474
10.9760 4234 11.2140 0 10.9760 4261.591 10.9760 -0.424						10.9760 3468 11.0683 0 10.9760 3453.821 10.9760 0.241						10.9760 3850 11.1073 0 10.9760 3895.220 10.9760 -0.729
10.9920 4275 11.2300 0 10.9920 4246.703 10.9920 0.433						10.9920 3408 11.0843 0 10.9920 3438.461 10.9920 -0.522						10.9920 3864 11.1233 0 10.9920 3879.290 10.9920 -0.246
11.0080 4272 11.2460 0 11.0080 4231.867 11.0080 0.614						11.0080 3394 11.1003 0 11.0080 3423.170 11.0080 -0.501						11.0080 3860 11.1393 0 11.0080 3863.425 11.0080 -0.055
11.0240 4324 11.2620 0 11.0240 4217.083 11.0240 1.626						11.0240 3421 11.1163 0 11.0240 3407.948 11.0240 0.223						11.0240 3845 11.1553 0 11.0240 3847.625 11.0240 -0.042
11.0400 4209 11.2780 0 11.0400 4202.352 11.0400 0.102						11.0400 3499 11.1323 0 11.0400 3392.794 11.0400 1.795						11.0400 3718 11.1713 0 11.0400 3831.890 11.0400 -1.868
11.0560 4240 11.2940 0 11.0560 4187.672 11.0560 0.804						11.0560 3257 11.1483 0 11.0560 3377.708 11.0560 -2.115						11.0560 3754 11.1873 0 11.0560 3816.220 11.0560 -1.016
11.0720 4101 11.3100 0 11.0720 4173.044 11.0720 -1.125						11.0720 3466 11.1643 1 11.0720 3362.691 11.0720 1.755						11.0720 3746 11.2033 0 11.0720 3800.615 11.0720 -0.892
11.0880 4231 11.3260 0 11.0880 4158.468 11.0880 1.115						11.0880 3339 11.1803 0 11.0880 3347.740 11.0880 -0.151						11.0880 3776 11.2193 0 11.0880 3785.073 11.0880 -0.148
11.1040 4192 11.3420 0 11.1040 4143.943 11.1040 0.742						11.1040 3303 11.1963 0 11.1040 3332.857 11.1040 -0.520						11.1040 3778 11.2353 1 11.1040 3769.595 11.1040 0.137
11.1200 4110 11.3580 0 11.1200 4129.470 11.1200 -0.304						11.1200 3302 11.2123 2 11.1200 3318.041 11.1200 -0.279						11.1200 3791 11.2513 0 11.1200 3754.180 11.1200 0.598
11.1360 4072 11.3740 0 11.1360 4115.048 11.1360 -0.675						11.1360 3325 11.2283 0 11.1360 3303.291 11.1360 0.376						11.1360 3777 11.2673 0 11.1360 3738.829 11.1360 0.621
11.1520 4000 11.3900 0 11.1520 4100.676 11.1520 -1.592						11.1520 3219 11.2443 0 11.1520 3288.607 11.1520 -1.227						11.1520 3721 11.2833 0 11.1520 3723.541 11.1520 -0.042
11.1680 4156 11.4060 1 11.1680 4086.355 11.1680 1.080						11.1680 3246 11.2603 1 11.1680 3273.990 11.1680 -0.491						11.1680 3710 11.2993 0 11.1680 3708.316 11.1680 0.028
11.1840 4070 11.4220 0 11.1840 4072.085 11.1840 -0.033						11.1840 3195 11.2763 2 11.1840 3259.437 11.1840 -1.140						11.1840 3727 11.3153 0 11.1840 3693.153 11.1840 0.554
11.2000 4091 11.4380 0 11.2000 4057.865 11.2000 0.518						11.2000 3309 11.2923 0 11.2000 3244.951 11.2000 1.113						11.2000 3682 11.3313 0 11.2000 3678.052 11.2000 0.065
11.2160 4184 11.4540 0 11.2160 4043.695 11.2160 2.169						11.2160 3251 11.3083 1 11.2160 3230.529 11.2160 0.359						11.2160 3821 11.3473 0 11.2160 3663.014 11.2160 2.556
11.2320 4020 11.4700 0 11.2320 4029.575 11.2320 -0.151						11.2320 3214 11.3243 0 11.2320 3216.173 11.2320 -0.038						11.2320 3735 11.3633 0 11.2320 3648.037 11.2320 1.423
11.2480 4018 11.4860 0 11.2480 4015.505 11.2480 0.039						11.2480 3155 11.3403 0 11.2480 3201.880 11.2480 -0.835						11.2480 3667 11.3793 0 11.2480 3633.122 11.2480 0.559
11.2640 4088 11.5020 0 11.2640 4001.484 11.2640 1.353						11.2640 3180 11.3563 0 11.2640 3187.652 11.2640 -0.136						11.2640 3679 11.3953 0 11.2640 3618.268 11.2640 1.001
11.2800 3945 11.5180 0 11.2800 3987.513 11.2800 -0.677						11.2800 3217 11.3723 0 11.2800 3173.488 11.2800 0.767						11.2800 3561 11.4113 0 11.2800 3603.475 11.2800 -0.712
11.2960 4006 11.5340 0 11.2960 3973.591 11.2960 0.512						11.2960 3176 11.3883 0 11.2960 3159.387 11.2960 0.295						11.2960 3656 11.4273 0 11.2960 3588.742 11.2960 1.112
11.3120 3973 11.5500 0 11.3120 3959.719 11.3120 0.211						11.3120 3126 11.4043 0 11.3120 3145.350 11.3120 -0.346						11.3120 3532 11.4433 0 11.3120 3574.071 11.3120 -0.708
11.3280 3825 11.5660 0 11.3280 3945.895 11.3280 -1.955						11.3280 3122 11.4203 0 11.3280 3131.376 11.3280 -0.168						11.3280 3475 11.4593 0 11.3280 3559.459 11.3280 -1.433
11.3440 3948 11.5820 1 11.3440 3932.120 11.3440 0.253						11.3440 3045 11.4363 0 11.3440 3117.465 11.3440 -1.313						11.3440 3582 11.4753 0 11.3440 3544.907 11.3440 0.620
11.3600 3867 11.5980 0 11.3600 3918.393 11.3600 -0.826						11.3600 3109 11.4523 0 11.3600 3103.616 11.3600 0.097						11.3600 3582 11.4913 0 11.3600 3530.416 11.3600 0.862
11.3760 3892 11.6140 0 11.3760 3904.715 11.3760 -0.204						11.3760 3065 11.4683 0 11.3760 3089.829 11.3760 -0.448						11.3760 3494 11.5073 0 11.3760 3515.983 11.3760 -0.372
11.3920 3860 11.6300 0 11.3920 3891.085 11.3920 -0.500						11.3920 3023 11.4843 0 11.3920 3076.104 11.3920 -0.966						11.3920 3561 11.5233 0 11.3920 3501.610 11.3920 0.995
11.4080 3796 11.6460 0 11.4080 3877.503 11.4080 -1.323						11.4080 3078 11.5003 0 11.4080 3062.441 11.4080 0.280						11.4080 3460 11.5393 0 11.4080 3487.296 11.4080 -0.464
11.4240 3957 11.6620 0 11.4240 3863.969 11.4240 1.479						11.4240 3136 11.5163 0 11.4240 3048.839 11.4240 1.556						11.4240 3564 11.5553 0 11.4240 3473.041 11.4240 1.524
11.4400 3970 11.6780 0 11.4400 3850.483 11.4400 1.897						11.4400 3022 11.5323 0 11.4400 3035.299 11.4400 -0.242						11.4400 3490 11.5713 0 11.4400 3458.844 11.4400 0.527
11.4560 3860 11.6940 0 11.4560 3837.045 11.4560 0.369						11.4560 2980 11.5483 0 11.4560 3021.819 11.4560 -0.766						11.4560 3516 11.5873 0 11.4560 3444.705 11.4560 1.202
11.4720 3780 11.7100 0 11.4720 3823.654 11.4720 -0.710						11.4720 2972 11.5643 0 11.4720 3008.399 11.4720 -0.668						11.4720 3388 11.6033 0 11.4720 3430.625 11.4720 -0.732
11.4880 3799 11.7260 0 11.4880 3810.310 11.4880 -0.183						11.4880 3041 11.5803 0 11.4880 2995.040 11.4880 0.833						11.4880 3438 11.6193 0 11.4880 3416.602 11.4880 0.365
11.5040 3855 11.7420 0 11.5040 3797.013 11.5040 0.934						11.5040 2972 11.5963 0 11.5040 2981.741 11.5040 -0.179						11.5040 3421 11.6353 0 11.5040 3402.637 11.5040 0.314
11.5200 3766 11.7580 0 11.5200 3783.763 11.5200 -0.289						11.5200 2952 11.6123 1 11.5200 2968.502 11.5200 -0.304						11.5200 3241 11.6513 0 11.5200 3388.729 11.5200 -2.595
11.5360 3786 11.7740 0 11.5360 3770.560 11.5360 0.251						11.5360 2932 11.6283 0 11.5360 2955.322 11.5360 -0.431						11.5360 3300 11.6673 0 11.5360 3374.879 11.5360 -1.303
11.5520 3704 11.7900 0 11.5520 3757.403 11.5520 -0.877						11.5520 2880 11.6443 0 11.5520 2942.201 11.5520 -1.159						11.5520 3328 11.6833 0 11.5520 3361.085 11.5520 -0.574
11.5680 3756 11.8060 0 11.5680 3744.292 11.5680 0.191						11.5680 2928 11.6603 0 11.5680 2929.139 11.5680 -0.021						11.5680 3230 11.6993 0 11.5680 3347.348 11.5680 -2.065
11.5840 3718 11.8220 0 11.5840 3731.229 11.5840 -0.217						11.5840 2887 11.6763 0 11.5840 2916.136 11.5840 -0.542						11.5840 3256 11.7153 0 11.5840 3333.667 11.5840 -1.361
11.6000 3554 11.8380 0 11.6000 3718.210 11.6000 -2.754						11.6000 2894 11.6923 0 11.6000 2903.192 11.6000 -0.171						11.6000 3245 11.7313 0 11.6000 3320.043 11.6000 -1.317
11.6160 3663 11.8540 0 11.6160 3705.238 11.6160 -0.698						11.6160 2854 11.7083 0 11.6160 2890.305 11.6160 -0.680						11.6160 3297 11.7473 0 11.6160 3306.474 11.6160 -0.165
11.6320 3631 11.8700 0 11.6320 3692.312 11.6320 -1.017						11.6320 2903 11.7243 0 11.6320 2877.477 11.6320 0.474						11.6320 3262 11.7633 1 11.6320 3292.961 11.6320 -0.542
11.6480 3686 11.8860 0 11.6480 3679.431 11.6480 0.108						11.6480 2764 11.7403 0 11.6480 2864.706 11.6480 -1.916						11.6480 3336 11.7793 0 11.6480 3279.504 11.6480 0.978
11.6640 3545 11.9020 0 11.6640 3666.596 11.6640 -2.042						11.6640 2889 11.7563 0 11.6640 2851.992 11.6640 0.689						11.6640 3175 11.7953 0 11.6640 3266.102 11.6640 -1.617
11.6800 3682 11.9180 0 11.6800 3653.806 11.6800 0.465						11.6800 2841 11.7723 1 11.6800 2839.336 11.6800 0.031						11.6800 3213 11.8113 0 11.6800 3252.754 11.6800 -0.701
11.6960 3707 11.9340 0 11.6960 3641.061 11.6960 1.083						11.6960 2783 11.7883 0 11.6960 2826.736 11.6960 -0.829						11.6960 3175 11.8273 0 11.6960 3239.462 11.6960 -1.144
11.7120 3695 11.9500 0 11.7120 3628.361 11.7120 1.096						11.7120 2745 11.8043 0 11.7120 2814.193 11.7120 -1.321						11.7120 3171 11.8433 0 11.7120 3226.224 11.7120 -0.981
11.7280 3523 11.9660 0 11.7280 3615.706 11.7280 -1.562						11.7280 2807 11.8203 0 11.7280 2801.706 11.7280 0.100						11.7280 3297 11.8593 0 11.7280 3213.041 11.7280 1.462
11.7440 3561 11.9820 0 11.7440 3603.095 11.7440 -0.705						11.7440 2834 11.8363 0 11.7440 2789.276 11.7440 0.840						11.7440 3336 11.8753 0 11.7440 3199.911 11.7440 2.356
11.7600 3611 11.9980 0 11.7600 3590.529 11.7600 0.341						11.7600 2750 11.8523 0 11.7600 2776.901 11.7600 -0.513						11.7600 3269 11.8913 0 11.7600 3186.836 11.7600 1.437
11.7760 3576 12.0140 0 11.7760 3578.007 11.7760 -0.034						11.7760 2786 11.8683 0 11.7760 2764.582 11.7760 0.406						11.7760 3124 11.9073 0 11.7760 3173.814 11.7760 -0.891
11.7920 3513 12.0300 0 11.7920 3565.530 11.7920 -0.886						11.7920 2761 11.8843 0 11.7920 2752.318 11.7920 0.165						11.7920 3138 11.9233 0 11.7920 3160.846 11.7920 -0.408
11.8080 3632 12.0460 0 11.8080 3553.096 11.8080 1.309						11.8080 2784 11.9003 0 11.8080 2740.109 11.8080 0.832						11.8080 3136 11.9393 0 11.8080 3147.931 11.8080 -0.213
11.8240 3565 12.0620 0 11.8240 3540.706 11.8240 0.407						11.8240 2714 11.9163 0 11.8240 2727.955 11.8240 -0.268						11.8240 3200 11.9553 0 11.8240 3135.069 11.8240 1.148
11.8400 3609 12.0780 0 11.8400 3528.360 11.8400 1.342						11.8400 2787 11.9323 0 11.8400 2715.856 11.8400 1.348						11.8400 3156 11.9713 0 11.8400 3122.260 11.8400 0.601
11.8560 3501 12.0940 0 11.8560 3516.057 11.8560 -0.254						11.8560 2704 11.9483 0 11.8560 2703.811 11.8560 0.004						11.8560 3140 11.9873 0 11.8560 3109.503 11.8560 0.544
11.8720 3599 12.1100 0 11.8720 3503.798 11.8720 1.587						11.8720 2770 11.9643 0 11.8720 2691.820 11.8720 1.485						11.8720 3138 12.0033 0 11.8720 3096.799 11.8720 0.735
11.8880 3541 12.1260 0 11.8880 3491.582 11.8880 0.830						11.8880 2651 11.9803 0 11.8880 2679.883 11.8880 -0.561						11.8880 2893 12.0193 0 11.8880 3084.147 11.8880 -3.554
11.9040 3483 12.1420 0 11.9040 3479.409 11.9040 0.061						11.9040 2735 11.9963 0 11.9040 2667.999 11.9040 1.281						11.9040 3162 12.0353 0 11.9040 3071.547 11.9040 1.609
11.9200 3360 12.1580 0 11.9200 3467.280 11.9200 -1.851						11.9200 2545 12.0123 0 11.9200 2656.169 11.9200 -2.204						11.9200 3016 12.0513 0 11.9200 3058.999 11.9200 -0.783
11.9360 3404 12.1740 0 11.9360 3455.192 11.9360 -0.877						11.9360 2615 12.0283 0 11.9360 2644.392 11.9360 -0.575						11.9360 3078 12.0673 0 11.9360 3046.502 11.9360 0.568
11.9520 3457 12.1900 0 11.9520 3443.148 11.9520 0.236						11.9520 2644 12.0443 0 11.9520 2632.668 11.9520 0.220						11.9520 2872 12.0833 0 11.9520 3034.056 11.9520 -3.024
11.9680 3336 12.2060 0 11.9680 3431.146 11.9680 -1.647						11.9680 2547 12.0603 0 11.9680 2620.997 11.9680 -1.466						11.9680 2977 12.0993 0 11.9680 3021.662 11.9680 -0.819
11.9840 3433 12.2220 0 11.9840 3419.186 11.9840 0.236						11.9840 2618 12.0763 0 11.9840 2609.378 11.9840 0.169						11.9840 3035 12.1153 0 11.9840 3009.318 11.9840 0.466
12.0000 3362 12.2380 0 12.0000 3407.269 12.0000 -0.781						12.0000 2588 12.0923 0 12.0000 2597.811 12.0000 -0.193						12.0000 3134 12.1313 0 12.0000 2997.025 12.0000 2.447
12.0160 3433 12.2540 0 12.0160 3395.393 12.0160 0.642						12.0160 2585 12.1083 0 12.0160 2586.296 12.0160 -0.025						12.0160 2935 12.1473 0 12.0160 2984.783 12.0160 -0.919
12.0320 3490 12.2700 0 12.0320 3383.560 12.0320 1.802						12.0320 2583 12.1243 0 12.0320 2574.833 12.0320 0.161						12.0320 3042 12.1633 0 12.0320 2972.591 12.0320 1.258
12.0480 3269 12.2860 0 12.0480 3371.768 12.0480 -1.797						12.0480 2572 12.1403 0 12.0480 2563.422 12.0480 0.169						12.0480 2939 12.1793 0 12.0480 2960.448 12.0480 -0.396
12.0640 3327 12.3020 0 12.0640 3360.017 12.0640 -0.572						12.0640 2588 12.1563 0 12.0640 2552.061 12.0640 0.706						12.0640 2885 12.1953 0 12.0640 2948.356 12.0640 -1.180
12.0800 3312 12.3180 0 12.0800 3348.308 12.0800 -0.631						12.0800 2483 12.1723 0 12.0800 2540.752 12.0800 -1.159						12.0800 2980 12.2113 0 12.0800 2936.314 12.0800 0.800
12.0960 3371 12.3340 0 12.0960 3336.641 12.0960 0.592						12.0960 2501 12.1883 0 12.0960 2529.493 12.0960 -0.570						12.0960 2914 12.2273 0 12.0960 2924.321 12.0960 -0.191
12.1120 3375 12.3500 0 12.1120 3325.014 12.1120 0.860						12.1120 2478 12.2043 0 12.1120 2518.285 12.1120 -0.809						12.1120 2926 12.2433 0 12.1120 2912.377 12.1120 0.252
12.1280 3256 12.3660 0 12.1280 3313.429 12.1280 -1.006						12.1280 2459 12.2203 0 12.1280 2507.128 12.1280 -0.971						12.1280 2899 12.2593 0 12.1280 2900.482 12.1280 -0.028
12.1440 3311 12.3820 0 12.1440 3301.884 12.1440 0.158						12.1440 2450 12.2363 0 12.1440 2496.021 12.1440 -0.930						12.1440 2892 12.2753 0 12.1440 2888.636 12.1440 0.063
12.1600 3218 12.3980 0 12.1600 3290.380 12.1600 -1.276						12.1600 2389 12.2523 1 12.1600 2484.963 12.1600 -1.963						12.1600 2958 12.2913 0 12.1600 2876.839 12.1600 1.492
12.1760 3201 12.4140 0 12.1760 3278.917 12.1760 -1.377						12.1760 2394 12.2683 1 12.1760 2473.955 12.1760 -1.634						12.1760 2926 12.3073 0 12.1760 2865.090 12.1760 1.126
12.1920 3274 12.4300 0 12.1920 3267.494 12.1920 0.114						12.1920 2358 12.2843 1 12.1920 2462.997 12.1920 -2.162						12.1920 2835 12.3233 2 12.1920 2853.389 12.1920 -0.345
12.2080 3322 12.4460 0 12.2080 3256.112 12.2080 1.143						12.2080 2405 12.3003 0 12.2080 2452.087 12.2080 -0.960						12.2080 2803 12.3393 1 12.2080 2841.736 12.2080 -0.732
12.2240 3223 12.4620 0 12.2240 3244.769 12.2240 -0.383						12.2240 2405 12.3163 0 12.2240 2441.227 12.2240 -0.739						12.2240 2848 12.3553 0 12.2240 2830.132 12.2240 0.335
12.2400 3253 12.4780 0 12.2400 3233.467 12.2400 0.342						12.2400 2431 12.3323 1 12.2400 2430.416 12.2400 0.012						12.2400 2871 12.3713 1 12.2400 2818.574 12.2400 0.978
12.2560 3241 12.4940 0 12.2560 3222.204 12.2560 0.330						12.2560 2375 12.3483 0 12.2560 2419.653 12.2560 -0.916						12.2560 2848 12.3873 0 12.2560 2807.065 12.2560 0.767
12.2720 3171 12.5100 0 12.2720 3210.981 12.2720 -0.710						12.2720 2357 12.3643 0 12.2720 2408.938 12.2720 -1.070						12.2720 2808 12.4033 0 12.2720 2795.602 12.2720 0.234
12.2880 3156 12.5260 0 12.2880 3199.798 12.2880 -0.780						12.2880 2290 12.3803 0 12.2880 2398.272 12.2880 -2.263						12.2880 2684 12.4193 0 12.2880 2784.187 12.2880 -1.934
12.3040 3114 12.5420 0 12.3040 3188.654 12.3040 -1.338						12.3040 2351 12.3963 0 12.3040 2387.653 12.3040 -0.756						12.3040 2796 12.4353 0 12.3040 2772.818 12.3040 0.438
12.3200 3175 12.5580 0 12.3200 3177.549 12.3200 -0.045						12.3200 2365 12.4123 0 12.3200 2377.083 12.3200 -0.248						12.3200 2700 12.4513 0 12.3200 2761.496 12.3200 -1.183
12.3360 3104 12.5740 0 12.3360 3166.484 12.3360 -1.122						12.3360 2398 12.4283 0 12.3360 2366.559 12.3360 0.642						12.3360 2766 12.4673 0 12.3360 2750.221 12.3360 0.300
12.3520 3159 12.5900 0 12.3520 3155.458 12.3520 0.063						12.3520 2327 12.4443 0 12.3520 2356.083 12.3520 -0.603						12.3520 2749 12.4833 0 12.3520 2738.992 12.3520 0.191
12.3680 3155 12.6060 0 12.3680 3144.470 12.3680 0.187						12.3680 2329 12.4603 0 12.3680 2345.654 12.3680 -0.345						12.3680 2647 12.4993 0 12.3680 2727.809 12.3680 -1.571
12.3840 3178 12.6220 0 12.3840 3133.521 12.3840 0.789						12.3840 2230 12.4763 0 12.3840 2335.272 12.3840 -2.229						12.3840 2751 12.5153 0 12.3840 2716.672 12.3840 0.654
12.4000 3079 12.6380 0 12.4000 3122.611 12.4000 -0.786						12.4000 2323 12.4923 0 12.4000 2324.937 12.4000 -0.040						12.4000 2739 12.5313 0 12.4000 2705.581 12.4000 0.639
12.4160 3081 12.6540 0 12.4160 3111.740 12.4160 -0.554						12.4160 2290 12.5083 0 12.4160 2314.647 12.4160 -0.515						12.4160 2754 12.5473 0 12.4160 2694.535 12.4160 1.133
12.4320 3173 12.6700 0 12.4320 3100.906 12.4320 1.280						12.4320 2261 12.5243 0 12.4320 2304.405 12.4320 -0.913						12.4320 2710 12.5633 0 12.4320 2683.534 12.4320 0.508
12.4480 3062 12.6860 0 12.4480 3090.111 12.4480 -0.508						12.4480 2295 12.5403 0 12.4480 2294.208 12.4480 0.017						12.4480 2677 12.5793 1 12.4480 2672.579 12.4480 0.085
12.4640 3054 12.7020 0 12.4640 3079.354 12.4640 -0.459						12.4640 2237 12.5563 0 12.4640 2284.057 12.4640 -0.995						12.4640 2591 12.5953 0 12.4640 2661.668 12.4640 -1.388
12.4800 3147 12.7180 0 12.4800 3068.635 12.4800 1.397						12.4800 2220 12.5723 0 12.4800 2273.951 12.4800 -1.145						12.4800 2602 12.6113 0 12.4800 2650.803 12.4800 -0.957
12.4960 3132 12.7340 0 12.4960 3057.954 12.4960 1.323						12.4960 2291 12.5883 0 12.4960 2263.891 12.4960 0.566						12.4960 2628 12.6273 0 12.4960 2639.982 12.4960 -0.234
12.5120 3027 12.7500 0 12.5120 3047.310 12.5120 -0.369						12.5120 2211 12.6043 0 12.5120 2253.876 12.5120 -0.912						12.5120 2623 12.6433 0 12.5120 2629.206 12.5120 -0.121
12.5280 3009 12.7660 0 12.5280 3036.704 12.5280 -0.505						12.5280 2338 12.6203 0 12.5280 2243.906 12.5280 1.946						12.5280 2708 12.6593 0 12.5280 2618.474 12.5280 1.720
12.5440 3021 12.7820 0 12.5440 3026.135 12.5440 -0.093						12.5440 2238 12.6363 0 12.5440 2233.981 12.5440 0.085						12.5440 2599 12.6753 1 12.5440 2607.785 12.5440 -0.172
12.5600 2998 12.7980 0 12.5600 3015.604 12.5600 -0.322						12.5600 2194 12.6523 0 12.5600 2224.101 12.5600 -0.643						12.5600 2572 12.6913 0 12.5600 2597.141 12.5600 -0.496
12.5760 3062 12.8140 0 12.5760 3005.110 12.5760 1.028						12.5760 2146 12.6683 0 12.5760 2214.264 12.5760 -1.474						12.5760 2692 12.7073 0 12.5760 2586.541 12.5760 2.033
12.5920 3014 12.8300 0 12.5920 2994.653 12.5920 0.352						12.5920 2181 12.6843 0 12.5920 2204.472 12.5920 -0.503						12.5920 2552 12.7233 0 12.5920 2575.983 12.5920 -0.475
12.6080 2883 12.8460 0 12.6080 2984.232 12.6080 -1.885						12.6080 2124 12.7003 0 12.6080 2194.724 12.6080 -1.535						12.6080 2516 12.7393 0 12.6080 2565.470 12.6080 -0.986
12.6240 2972 12.8620 0 12.6240 2973.849 12.6240 -0.034						12.6240 2145 12.7163 0 12.6240 2185.020 12.6240 -0.864						12.6240 2550 12.7553 0 12.6240 2554.999 12.6240 -0.099
12.6400 2899 12.8780 0 12.6400 2963.502 12.6400 -1.198						12.6400 2144 12.7323 0 12.6400 2175.360 12.6400 -0.677						12.6400 2539 12.7713 0 12.6400 2544.572 12.6400 -0.111
12.6560 2950 12.8940 0 12.6560 2953.191 12.6560 -0.059						12.6560 2057 12.7483 0 12.6560 2165.742 12.6560 -2.398						12.6560 2532 12.7873 0 12.6560 2534.187 12.6560 -0.043
12.6720 2954 12.9100 0 12.6720 2942.917 12.6720 0.204						12.6720 2196 12.7643 0 12.6720 2156.168 12.6720 0.850						12.6720 2456 12.8033 0 12.6720 2523.845 12.6720 -1.369
12.6880 2879 12.9260 0 12.6880 2932.679 12.6880 -1.000						12.6880 2180 12.7803 0 12.6880 2146.637 12.6880 0.715						12.6880 2476 12.8193 0 12.6880 2513.545 12.6880 -0.755
12.7040 2899 12.9420 0 12.7040 2922.477 12.7040 -0.436						12.7040 2098 12.7963 0 12.7040 2137.149 12.7040 -0.855						12.7040 2400 12.8353 0 12.7040 2503.288 12.7040 -2.108
12.7200 2872 12.9580 0 12.7200 2912.311 12.7200 -0.752						12.7200 2107 12.8123 0 12.7200 2127.704 12.7200 -0.451						12.7200 2498 12.8513 0 12.7200 2493.073 12.7200 0.099
12.7360 2948 12.9740 0 12.7360 2902.181 12.7360 0.844						12.7360 2135 12.8283 0 12.7360 2118.301 12.7360 0.361						12.7360 2533 12.8673 0 12.7360 2482.899 12.7360 0.995
12.7520 2827 12.9900 0 12.7520 2892.087 12.7520 -1.224						12.7520 2085 12.8443 1 12.7520 2108.940 12.7520 -0.524						12.7520 2484 12.8833 0 12.7520 2472.768 12.7520 0.225
12.7680 2826 13.0060 0 12.7680 2882.029 12.7680 -1.054						12.7680 1999 12.8603 0 12.7680 2099.621 12.7680 -2.251						12.7680 2485 12.8993 0 12.7680 2462.678 12.7680 0.448
12.7840 2806 13.0220 0 12.7840 2872.005 12.7840 -1.246						12.7840 2187 12.8763 0 12.7840 2090.344 12.7840 2.067						12.7840 2420 12.9153 0 12.7840 2452.629 12.7840 -0.663
12.8000 2871 13.0380 0 12.8000 2862.018 12.8000 0.168						12.8000 2080 12.8923 1 12.8000 2081.108 12.8000 -0.024						12.8000 2437 12.9313 0 12.8000 2442.622 12.8000 -0.114
12.8160 2870 13.0540 0 12.8160 2852.065 12.8160 0.335						12.8160 1932 12.9083 0 12.8160 2071.915 12.8160 -3.183						12.8160 2338 12.9473 0 12.8160 2432.656 12.8160 -1.958
12.8320 2840 13.0700 0 12.8320 2842.147 12.8320 -0.040						12.8320 2149 12.9243 0 12.8320 2062.762 12.8320 1.860						12.8320 2522 12.9633 1 12.8320 2422.731 12.8320 1.977
12.8480 2802 13.0860 0 12.8480 2832.265 12.8480 -0.572						12.8480 2106 12.9403 1 12.8480 2053.650 12.8480 1.141						12.8480 2458 12.9793 0 12.8480 2412.846 12.8480 0.911
12.8640 2775 13.1020 0 12.8640 2822.417 12.8640 -0.900						12.8640 2033 12.9563 0 12.8640 2044.580 12.8640 -0.257						12.8640 2398 12.9953 0 12.8640 2403.002 12.8640 -0.102
12.8800 2836 13.1180 0 12.8800 2812.604 12.8800 0.439						12.8800 2099 12.9723 0 12.8800 2035.550 12.8800 1.385						12.8800 2368 13.0113 0 12.8800 2393.199 12.8800 -0.518
12.8960 2820 13.1340 0 12.8960 2802.826 12.8960 0.323						12.8960 1984 12.9883 0 12.8960 2026.561 12.8960 -0.956						12.8960 2309 13.0273 1 12.8960 2383.436 12.8960 -1.549
12.9120 2845 13.1500 0 12.9120 2793.082 12.9120 0.973						12.9120 2026 13.0043 0 12.9120 2017.612 12.9120 0.186						12.9120 2431 13.0433 0 12.9120 2373.712 12.9120 1.162
12.9280 2823 13.1660 0 12.9280 2783.373 12.9280 0.746						12.9280 1963 13.0203 0 12.9280 2008.703 12.9280 -1.032						12.9280 2340 13.0593 0 12.9280 2364.029 12.9280 -0.497
12.9440 2788 13.1820 0 12.9440 2773.697 12.9440 0.271						12.9440 1977 13.0363 0 12.9440 1999.835 12.9440 -0.514						12.9440 2446 13.0753 0 12.9440 2354.385 12.9440 1.852
12.9600 2732 13.1980 0 12.9600 2764.056 12.9600 -0.613						12.9600 1923 13.0523 0 12.9600 1991.006 12.9600 -1.551						12.9600 2368 13.0913 0 12.9600 2344.781 12.9600 0.477
12.9760 2695 13.2140 0 12.9760 2754.449 12.9760 -1.145						12.9760 2036 13.0683 0 12.9760 1982.217 12.9760 1.192						12.9760 2320 13.1073 0 12.9760 2335.217 12.9760 -0.316
12.9920 2726 13.2300 0 12.9920 2744.876 12.9920 -0.362						12.9920 1925 13.0843 0 12.9920 1973.467 12.9920 -1.105						12.9920 2372 13.1233 0 12.9920 2325.692 12.9920 0.951
13.0080 2771 13.2460 0 13.0080 2735.336 13.0080 0.678						13.0080 2004 13.1003 0 13.0080 1964.757 13.0080 0.877						13.0080 2373 13.1393 0 13.0080 2316.206 13.0080 1.166
13.0240 2789 13.2620 0 13.0240 2725.830 13.0240 1.196						13.0240 2013 13.1163 0 13.0240 1956.085 13.0240 1.269						13.0240 2293 13.1553 0 13.0240 2306.759 13.0240 -0.287
13.0400 2706 13.2780 0 13.0400 2716.358 13.0400 -0.199						13.0400 1919 13.1323 0 13.0400 1947.453 13.0400 -0.650						13.0400 2344 13.1713 0 13.0400 2297.350 13.0400 0.964
13.0560 2654 13.2940 0 13.0560 2706.919 13.0560 -1.027						13.0560 1962 13.1483 0 13.0560 1938.859 13.0560 0.522						13.0560 2214 13.1873 0 13.0560 2287.981 13.0560 -1.572
13.0720 2672 13.3100 0 13.0720 2697.513 13.0720 -0.494						13.0720 1939 13.1643 0 13.0720 1930.305 13.0720 0.197						13.0720 2284 13.2033 0 13.0720 2278.649 13.0720 0.112
13.0880 2707 13.3260 0 13.0880 2688.141 13.0880 0.362						13.0880 1915 13.1803 0 13.0880 1921.788 13.0880 -0.155						13.0880 2280 13.2193 0 13.0880 2269.356 13.0880 0.223
13.1040 2684 13.3420 1 13.1040 2678.801 13.1040 0.100						13.1040 1918 13.1963 1 13.1040 1913.310 13.1040 0.107						13.1040 2236 13.2353 0 13.1040 2260.102 13.1040 -0.510
13.1200 2652 13.3580 0 13.1200 2669.495 13.1200 -0.340						13.1200 1876 13.2123 0 13.1200 1904.870 13.1200 -0.667						13.1200 2288 13.2513 0 13.1200 2250.885 13.1200 0.776
13.1360 2592 13.3740 0 13.1360 2660.221 13.1360 -1.340						13.1360 1872 13.2283 0 13.1360 1896.467 13.1360 -0.566						13.1360 2199 13.2673 0 13.1360 2241.706 13.1360 -0.911
13.1520 2711 13.3900 1 13.1520 2650.980 13.1520 1.153						13.1520 1881 13.2443 0 13.1520 1888.103 13.1520 -0.164						13.1520 2237 13.2833 0 13.1520 2232.564 13.1520 0.094
13.1680 2594 13.4060 0 13.1680 2641.772 13.1680 -0.938						13.1680 1849 13.2603 0 13.1680 1879.776 13.1680 -0.716						13.1680 2272 13.2993 1 13.1680 2223.461 13.1680 1.018
13.1840 2568 13.4220 0 13.1840 2632.596 13.1840 -1.275						13.1840 1860 13.2763 1 13.1840 1871.486 13.1840 -0.266						13.1840 2231 13.3153 1 13.1840 2214.394 13.1840 0.352
13.2000 2520 13.4380 0 13.2000 2623.453 13.2000 -2.061						13.2000 1886 13.2923 0 13.2000 1863.234 13.2000 0.524						13.2000 2191 13.3313 0 13.2000 2205.365 13.2000 -0.307
13.2160 2552 13.4540 0 13.2160 2614.341 13.2160 -1.234						13.2160 1814 13.3083 0 13.2160 1855.019 13.2160 -0.963						13.2160 2264 13.3473 0 13.2160 2196.373 13.2160 1.421
13.2320 2628 13.4700 0 13.2320 2605.262 13.2320 0.444						13.2320 1859 13.3243 0 13.2320 1846.841 13.2320 0.282						13.2320 2154 13.3633 0 13.2320 2187.418 13.2320 -0.720
13.2480 2573 13.4860 0 13.2480 2596.215 13.2480 -0.458						13.2480 1859 13.3403 0 13.2480 1838.699 13.2480 0.471						13.2480 2179 13.3793 0 13.2480 2178.500 13.2480 0.011
13.2640 2510 13.5020 1 13.2640 2587.200 13.2640 -1.541						13.2640 1725 13.3563 1 13.2640 1830.594 13.2640 -2.542						13.2640 2190 13.3953 0 13.2640 2169.618 13.2640 0.436
13.2800 2508 13.5180 0 13.2800 2578.217 13.2800 -1.402						13.2800 1829 13.3723 0 13.2800 1822.525 13.2800 0.151						13.2800 2133 13.4113 0 13.2800 2160.773 13.2800 -0.601
13.2960 2585 13.5340 0 13.2960 2569.265 13.2960 0.309						13.2960 1808 13.3883 0 13.2960 1814.493 13.2960 -0.153						13.2960 2191 13.4273 0 13.2960 2151.964 13.2960 0.834
13.3120 2517 13.5500 1 13.3120 2560.345 13.3120 -0.864						13.3120 1821 13.4043 0 13.3120 1806.497 13.3120 0.340						13.3120 2175 13.4433 1 13.3120 2143.191 13.3120 0.682
13.3280 2559 13.5660 0 13.3280 2551.456 13.3280 0.149						13.3280 1763 13.4203 1 13.3280 1798.536 13.3280 -0.846						13.3280 2130 13.4593 0 13.3280 2134.454 13.3280 -0.097
13.3440 2534 13.5820 0 13.3440 2542.599 13.3440 -0.171						13.3440 1832 13.4363 0 13.3440 1790.611 13.3440 0.967						13.3440 2098 13.4753 0 13.3440 2125.753 13.3440 -0.606
13.3600 2544 13.5980 0 13.3600 2533.772 13.3600 0.203						13.3600 1715 13.4523 0 13.3600 1782.722 13.3600 -1.635						13.3600 2122 13.4913 0 13.3600 2117.088 13.3600 0.107
13.3760 2569 13.6140 0 13.3760 2524.978 13.3760 0.869						13.3760 1777 13.4683 0 13.3760 1774.869 13.3760 0.051						13.3760 2096 13.5073 0 13.3760 2108.458 13.3760 -0.272
13.3920 2584 13.6300 0 13.3920 2516.214 13.3920 1.334						13.3920 1748 13.4843 0 13.3920 1767.050 13.3920 -0.456						13.3920 2024 13.5233 0 13.3920 2099.864 13.3920 -1.686
13.4080 2448 13.6460 0 13.4080 2507.480 13.4080 -1.202						13.4080 1737 13.5003 0 13.4080 1759.267 13.4080 -0.534						13.4080 2047 13.5393 0 13.4080 2091.305 13.4080 -0.979
13.4240 2497 13.6620 0 13.4240 2498.778 13.4240 -0.036						13.4240 1782 13.5163 0 13.4240 1751.519 13.4240 0.722						13.4240 2093 13.5553 0 13.4240 2082.781 13.4240 0.223
13.4400 2480 13.6780 0 13.4400 2490.106 13.4400 -0.203						13.4400 1690 13.5323 0 13.4400 1743.805 13.4400 -1.309						13.4400 2067 13.5713 0 13.4400 2074.293 13.4400 -0.160
13.4560 2520 13.6940 0 13.4560 2481.465 13.4560 0.768						13.4560 1688 13.5483 0 13.4560 1736.127 13.4560 -1.171						13.4560 2108 13.5873 0 13.4560 2065.839 13.4560 0.918
13.4720 2474 13.7100 0 13.4720 2472.855 13.4720 0.023						13.4720 1745 13.5643 0 13.4720 1728.482 13.4720 0.395						13.4720 2062 13.6033 0 13.4720 2057.420 13.4720 0.101
13.4880 2429 13.7260 0 13.4880 2464.275 13.4880 -0.716						13.4880 1681 13.5803 0 13.4880 1720.872 13.4880 -0.972						13.4880 2062 13.6193 0 13.4880 2049.035 13.4880 0.286
13.5040 2412 13.7420 0 13.5040 2455.725 13.5040 -0.890						13.5040 1667 13.5963 0 13.5040 1713.297 13.5040 -1.134						13.5040 2036 13.6353 0 13.5040 2040.685 13.5040 -0.104
13.5200 2461 13.7580 0 13.5200 2447.205 13.5200 0.278						13.5200 1683 13.6123 0 13.5200 1705.755 13.5200 -0.555						13.5200 2008 13.6513 0 13.5200 2032.369 13.5200 -0.544
13.5360 2432 13.7740 0 13.5360 2438.715 13.5360 -0.136						13.5360 1774 13.6283 0 13.5360 1698.247 13.5360 1.799						13.5360 1985 13.6673 0 13.5360 2024.087 13.5360 -0.877
13.5520 2373 13.7900 1 13.5520 2430.256 13.5520 -1.175						13.5520 1683 13.6443 0 13.5520 1690.773 13.5520 -0.189						13.5520 1929 13.6833 0 13.5520 2015.839 13.5520 -1.977
13.5680 2468 13.8060 1 13.5680 2421.826 13.5680 0.929						13.5680 1692 13.6603 0 13.5680 1683.332 13.5680 0.211						13.5680 1942 13.6993 0 13.5680 2007.626 13.5680 -1.489
13.5840 2461 13.8220 0 13.5840 2413.426 13.5840 0.959						13.5840 1699 13.6763 0 13.5840 1675.925 13.5840 0.560						13.5840 1978 13.7153 0 13.5840 1999.445 13.5840 -0.482
13.6000 2373 13.8380 1 13.6000 2405.055 13.6000 -0.658						13.6000 1655 13.6923 0 13.6000 1668.551 13.6000 -0.333						13.6000 1921 13.7313 0 13.6000 1991.299 13.6000 -1.604
13.6160 2408 13.8540 0 13.6160 2396.714 13.6160 0.230						13.6160 1689 13.7083 0 13.6160 1661.210 13.6160 0.676						13.6160 1938 13.7473 1 13.6160 1983.186 13.6160 -1.026
13.6320 2408 13.8700 0 13.6320 2388.402 13.6320 0.399						13.6320 1563 13.7243 2 13.6320 1653.902 13.6320 -2.299						13.6320 1952 13.7633 0 13.6320 1975.106 13.6320 -0.523
13.6480 2387 13.8860 1 13.6480 2380.120 13.6480 0.141						13.6480 1668 13.7403 0 13.6480 1646.627 13.6480 0.523						13.6480 1932 13.7793 0 13.6480 1967.059 13.6480 -0.798
13.6640 2416 13.9020 1 13.6640 2371.866 13.6640 0.898						13.6640 1618 13.7563 0 13.6640 1639.385 13.6640 -0.532						13.6640 1923 13.7953 0 13.6640 1959.046 13.6640 -0.822
13.6800 2357 13.9180 0 13.6800 2363.642 13.6800 -0.137						13.6800 1673 13.7723 0 13.6800 1632.175 13.6800 0.998						13.6800 1996 13.8113 0 13.6800 1951.065 13.6800 1.006
13.6960 2286 13.9340 0 13.6960 2355.447 13.6960 -1.453						13.6960 1630 13.7883 0 13.6960 1624.998 13.6960 0.124						13.6960 1986 13.8273 0 13.6960 1943.117 13.6960 0.962
13.7120 2319 13.9500 0 13.7120 2347.281 13.7120 -0.587						13.7120 1575 13.8043 0 13.7120 1617.853 13.7120 -1.080						13.7120 1906 13.8433 0 13.7120 1935.202 13.7120 -0.669
13.7280 2293 13.9660 0 13.7280 2339.144 13.7280 -0.964						13.7280 1561 13.8203 1 13.7280 1610.740 13.7280 -1.259						13.7280 1811 13.8593 0 13.7280 1927.319 13.7280 -2.733
13.7440 2273 13.9820 0 13.7440 2331.035 13.7440 -1.217						13.7440 1588 13.8363 0 13.7440 1603.659 13.7440 -0.393						13.7440 1856 13.8753 0 13.7440 1919.468 13.7440 -1.473
13.7600 2300 13.9980 0 13.7600 2322.955 13.7600 -0.479						13.7600 1652 13.8523 0 13.7600 1596.609 13.7600 1.363						13.7600 1899 13.8913 0 13.7600 1911.650 13.7600 -0.290
13.7760 2274 14.0140 0 13.7760 2314.904 13.7760 -0.858						13.7760 1607 13.8683 0 13.7760 1589.592 13.7760 0.434						13.7760 1899 13.9073 0 13.7760 1903.864 13.7760 -0.112
13.7920 2362 14.0300 0 13.7920 2306.880 13.7920 1.134						13.7920 1558 13.8843 1 13.7920 1582.606 13.7920 -0.623						13.7920 1907 13.9233 0 13.7920 1896.110 13.7920 0.249
13.8080 2315 14.0460 0 13.8080 2298.885 13.8080 0.335						13.8080 1566 13.9003 0 13.8080 1575.651 13.8080 -0.244						13.8080 1956 13.9393 0 13.8080 1888.387 13.8080 1.529
13.8240 2317 14.0620 0 13.8240 2290.919 13.8240 0.542						13.8240 1497 13.9163 0 13.8240 1568.727 13.8240 -1.854						13.8240 1927 13.9553 0 13.8240 1880.697 13.8240 1.055
13.8400 2226 14.0780 0 13.8400 2282.980 13.8400 -1.208						13.8400 1513 13.9323 0 13.8400 1561.835 13.8400 -1.255						13.8400 1921 13.9713 0 13.8400 1873.038 13.8400 1.094
13.8560 2305 14.0940 0 13.8560 2275.070 13.8560 0.623						13.8560 1539 13.9483 0 13.8560 1554.974 13.8560 -0.407						13.8560 1798 13.9873 0 13.8560 1865.410 13.8560 -1.590
13.8720 2272 14.1100 1 13.8720 2267.187 13.8720 0.101						13.8720 1556 13.9643 0 13.8720 1548.143 13.8720 0.199						13.8720 1830 14.0033 0 13.8720 1857.814 13.8720 -0.650
13.8880 2327 14.1260 0 13.8880 2259.332 13.8880 1.403						13.8880 1519 13.9803 0 13.8880 1541.343 13.8880 -0.573						13.8880 1836 14.0193 0 13.8880 1850.249 13.8880 -0.333
13.9040 2295 14.1420 0 13.9040 2251.505 13.9040 0.908						13.9040 1573 13.9963 0 13.9040 1534.574 13.9040 0.969						13.9040 1909 14.0353 0 13.9040 1842.715 13.9040 1.517
13.9200 2186 14.1580 0 13.9200 2243.706 13.9200 -1.234						13.9200 1487 14.0123 0 13.9200 1527.835 13.9200 -1.059						13.9200 1813 14.0513 0 13.9200 1835.212 13.9200 -0.522
13.9360 2229 14.1740 0 13.9360 2235.934 13.9360 -0.147						13.9360 1493 14.0283 0 13.9360 1521.126 13.9360 -0.728						13.9360 1849 14.0673 0 13.9360 1827.739 13.9360 0.494
13.9520 2200 14.1900 0 13.9520 2228.189 13.9520 -0.601						13.9520 1496 14.0443 0 13.9520 1514.447 13.9520 -0.477						13.9520 1725 14.0833 0 13.9520 1820.298 13.9520 -2.294
13.9680 2219 14.2060 0 13.9680 2220.472 13.9680 -0.031						13.9680 1537 14.0603 1 13.9680 1507.799 13.9680 0.745						13.9680 1842 14.0993 1 13.9680 1812.887 13.9680 0.678
13.9840 2183 14.2220 0 13.9840 2212.781 13.9840 -0.637						13.9840 1459 14.0763 1 13.9840 1501.180 13.9840 -1.104						13.9840 1805 14.1153 0 13.9840 1805.506 13.9840 -0.012
14.0000 2257 14.2380 0 14.0000 2205.118 14.0000 1.092						14.0000 1451 14.0923 0 14.0000 1494.591 14.0000 -1.144						14.0000 1785 14.1313 0 14.0000 1798.156 14.0000 -0.311
14.0160 2158 14.2540 1 14.0160 2197.482 14.0160 -0.850						14.0160 1504 14.1083 0 14.0160 1488.031 14.0160 0.412						14.0160 1743 14.1473 1 14.0160 1790.836 14.0160 -1.146
14.0320 2158 14.2700 0 14.0320 2189.873 14.0320 -0.686						14.0320 1493 14.1243 0 14.0320 1481.502 14.0320 0.298						14.0320 1759 14.1633 0 14.0320 1783.546 14.0320 -0.585
14.0480 2192 14.2860 0 14.0480 2182.291 14.0480 0.207						14.0480 1489 14.1403 0 14.0480 1475.001 14.0480 0.363						14.0480 1725 14.1793 0 14.0480 1776.285 14.0480 -1.235
14.0640 2167 14.3020 0 14.0640 2174.736 14.0640 -0.166						14.0640 1471 14.1563 0 14.0640 1468.530 14.0640 0.064						14.0640 1721 14.1953 0 14.0640 1769.055 14.0640 -1.158
14.0800 2125 14.3180 0 14.0800 2167.207 14.0800 -0.916						14.0800 1403 14.1723 0 14.0800 1462.087 14.0800 -1.577						14.0800 1769 14.2113 0 14.0800 1761.854 14.0800 0.170
14.0960 2180 14.3340 0 14.0960 2159.705 14.0960 0.435						14.0960 1465 14.1883 0 14.0960 1455.674 14.0960 0.244						14.0960 1783 14.2273 0 14.0960 1754.683 14.0960 0.671
14.1120 2103 14.3500 0 14.1120 2152.229 14.1120 -1.073						14.1120 1497 14.2043 0 14.1120 1449.289 14.1120 1.233						14.1120 1740 14.2433 0 14.1120 1747.542 14.1120 -0.181
14.1280 2142 14.3660 0 14.1280 2144.779 14.1280 -0.060						14.1280 1402 14.2203 0 14.1280 1442.933 14.1280 -1.093						14.1280 1731 14.2593 0 14.1280 1740.429 14.1280 -0.227
14.1440 2124 14.3820 0 14.1440 2137.356 14.1440 -0.290						14.1440 1456 14.2363 0 14.1440 1436.606 14.1440 0.508						14.1440 1708 14.2753 0 14.1440 1733.346 14.1440 -0.613
14.1600 2146 14.3980 0 14.1600 2129.959 14.1600 0.346						14.1600 1383 14.2523 0 14.1600 1430.307 14.1600 -1.272						14.1600 1753 14.2913 0 14.1600 1726.292 14.1600 0.638
14.1760 2165 14.4140 0 14.1760 2122.588 14.1760 0.911						14.1760 1423 14.2683 0 14.1760 1424.036 14.1760 -0.027						14.1760 1729 14.3073 0 14.1760 1719.267 14.1760 0.234
14.1920 2103 14.4300 0 14.1920 2115.243 14.1920 -0.267						14.1920 1341 14.2843 0 14.1920 1417.794 14.1920 -2.097						14.1920 1750 14.3233 0 14.1920 1712.271 14.1920 0.902
14.2080 2064 14.4460 0 14.2080 2107.924 14.2080 -0.967						14.2080 1376 14.3003 0 14.2080 1411.579 14.2080 -0.959						14.2080 1699 14.3393 0 14.2080 1705.303 14.2080 -0.153
14.2240 2112 14.4620 0 14.2240 2100.631 14.2240 0.247						14.2240 1398 14.3163 0 14.2240 1405.393 14.2240 -0.198						14.2240 1668 14.3553 0 14.2240 1698.364 14.2240 -0.743
14.2400 2002 14.4780 0 14.2400 2093.364 14.2400 -2.042						14.2400 1412 14.3323 0 14.2400 1399.234 14.2400 0.340						14.2400 1690 14.3713 0 14.2400 1691.454 14.2400 -0.035
14.2560 2096 14.4940 0 14.2560 2086.122 14.2560 0.216						14.2560 1390 14.3483 0 14.2560 1393.103 14.2560 -0.083						14.2560 1752 14.3873 1 14.2560 1684.572 14.2560 1.611
14.2720 2054 14.5100 1 14.2720 2078.906 14.2720 -0.550						14.2720 1429 14.3643 0 14.2720 1386.999 14.2720 1.111						14.2720 1620 14.4033 0 14.2720 1677.718 14.2720 -1.434
14.2880 2016 14.5260 0 14.2880 2071.715 14.2880 -1.241						14.2880 1368 14.3803 0 14.2880 1380.923 14.2880 -0.349						14.2880 1751 14.4193 0 14.2880 1670.892 14.2880 1.914
14.3040 2064 14.5420 0 14.3040 2064.549 14.3040 -0.012						14.3040 1387 14.3963 0 14.3040 1374.874 14.3040 0.326						14.3040 1609 14.4353 0 14.3040 1664.095 14.3040 -1.374
14.3200 1976 14.5580 0 14.3200 2057.409 14.3200 -1.831						14.3200 1379 14.4123 0 14.3200 1368.853 14.3200 0.273						14.3200 1616 14.4513 0 14.3200 1657.325 14.3200 -1.028
14.3360 2006 14.5740 0 14.3360 2050.294 14.3360 -0.989						14.3360 1340 14.4283 0 14.3360 1362.858 14.3360 -0.624						14.3360 1653 14.4673 0 14.3360 1650.583 14.3360 0.059
14.3520 2004 14.5900 0 14.3520 2043.204 14.3520 -0.876						14.3520 1357 14.4443 0 14.3520 1356.891 14.3520 0.003						14.3520 1618 14.4833 0 14.3520 1643.869 14.3520 -0.643
14.3680 2020 14.6060 0 14.3680 2036.139 14.3680 -0.359						14.3680 1347 14.4603 0 14.3680 1350.950 14.3680 -0.108						14.3680 1657 14.4993 0 14.3680 1637.182 14.3680 0.487
14.3840 1995 14.6220 0 14.3840 2029.099 14.3840 -0.763						14.3840 1364 14.4763 0 14.3840 1345.035 14.3840 0.513						14.3840 1665 14.5153 0 14.3840 1630.523 14.3840 0.845
14.4000 2022 14.6380 0 14.4000 2022.083 14.4000 -0.002						14.4000 1322 14.4923 0 14.4000 1339.148 14.4000 -0.472						14.4000 1601 14.5313 0 14.4000 1623.891 14.4000 -0.572
14.4160 1983 14.6540 0 14.4160 2015.093 14.4160 -0.721						14.4160 1328 14.5083 0 14.4160 1333.287 14.4160 -0.145						14.4160 1616 14.5473 0 14.4160 1617.286 14.4160 -0.032
14.4320 1921 14.6700 0 14.4320 2008.127 14.4320 -1.988						14.4320 1335 14.5243 0 14.4320 1327.452 14.4320 0.207						14.4320 1570 14.5633 0 14.4320 1610.709 14.4320 -1.027
14.4480 1987 14.6860 0 14.4480 2001.186 14.4480 -0.318						14.4480 1305 14.5403 0 14.4480 1321.643 14.4480 -0.461						14.4480 1636 14.5793 0 14.4480 1604.158 14.4480 0.787
14.4640 1985 14.7020 0 14.4640 1994.269 14.4640 -0.208						14.4640 1255 14.5563 0 14.4640 1315.861 14.4640 -1.718						14.4640 1604 14.5953 0 14.4640 1597.635 14.4640 0.159
14.4800 1987 14.7180 0 14.4800 1987.377 14.4800 -0.008						14.4800 1286 14.5723 0 14.4800 1310.104 14.4800 -0.672						14.4800 1588 14.6113 0 14.4800 1591.138 14.4800 -0.079
14.4960 1950 14.7340 0 14.4960 1980.509 14.4960 -0.691						14.4960 1307 14.5883 0 14.4960 1304.373 14.4960 0.073						14.4960 1626 14.6273 0 14.4960 1584.668 14.4960 1.025
14.5120 1909 14.7500 0 14.5120 1973.665 14.5120 -1.480						14.5120 1278 14.6043 0 14.5120 1298.668 14.5120 -0.578						14.5120 1634 14.6433 0 14.5120 1578.224 14.5120 1.380
14.5280 1999 14.7660 0 14.5280 1966.845 14.5280 0.719						14.5280 1280 14.6203 0 14.5280 1292.989 14.5280 -0.363						14.5280 1533 14.6593 0 14.5280 1571.807 14.5280 -0.991
14.5440 1895 14.7820 0 14.5440 1960.050 14.5440 -1.494						14.5440 1239 14.6363 0 14.5440 1287.335 14.5440 -1.373						14.5440 1520 14.6753 0 14.5440 1565.416 14.5440 -1.165
14.5600 1913 14.7980 0 14.5600 1953.278 14.5600 -0.921						14.5600 1226 14.6523 0 14.5600 1281.707 14.5600 -1.591						14.5600 1514 14.6913 0 14.5600 1559.052 14.5600 -1.158
14.5760 1964 14.8140 0 14.5760 1946.530 14.5760 0.394						14.5760 1303 14.6683 0 14.5760 1276.104 14.5760 0.745						14.5760 1572 14.7073 0 14.5760 1552.713 14.5760 0.486
14.5920 1880 14.8300 0 14.5920 1939.806 14.5920 -1.379						14.5920 1244 14.6843 0 14.5920 1270.526 14.5920 -0.752						14.5920 1559 14.7233 0 14.5920 1546.401 14.5920 0.319
14.6080 1911 14.8460 0 14.6080 1933.106 14.6080 -0.506						14.6080 1252 14.7003 0 14.6080 1264.973 14.6080 -0.367						14.6080 1516 14.7393 0 14.6080 1540.114 14.6080 -0.619
14.6240 1964 14.8620 0 14.6240 1926.429 14.6240 0.848						14.6240 1276 14.7163 0 14.6240 1259.445 14.6240 0.463						14.6240 1505 14.7553 0 14.6240 1533.853 14.6240 -0.744
14.6400 1820 14.8780 0 14.6400 1919.776 14.6400 -2.339						14.6400 1262 14.7323 0 14.6400 1253.942 14.6400 0.227						14.6400 1536 14.7713 0 14.6400 1527.618 14.6400 0.214
14.6560 1865 14.8940 0 14.6560 1913.146 14.6560 -1.115						14.6560 1196 14.7483 0 14.6560 1248.463 14.6560 -1.517						14.6560 1584 14.7873 0 14.6560 1521.409 14.6560 1.573
14.6720 1959 14.9100 0 14.6720 1906.540 14.6720 1.185						14.6720 1220 14.7643 0 14.6720 1243.009 14.6720 -0.659						14.6720 1508 14.8033 0 14.6720 1515.225 14.6720 -0.186
14.6880 1831 14.9260 0 14.6880 1899.957 14.6880 -1.612						14.6880 1244 14.7803 0 14.6880 1237.580 14.6880 0.182						14.6880 1479 14.8193 0 14.6880 1509.067 14.6880 -0.782
14.7040 1822 14.9420 0 14.7040 1893.397 14.7040 -1.673						14.7040 1210 14.7963 0 14.7040 1232.175 14.7040 -0.637						14.7040 1455 14.8353 0 14.7040 1502.934 14.7040 -1.257
14.7200 1810 14.9580 0 14.7200 1886.860 14.7200 -1.807						14.7200 1261 14.8123 0 14.7200 1226.794 14.7200 0.963						14.7200 1433 14.8513 0 14.7200 1496.826 14.7200 -1.686
14.7360 1907 14.9740 0 14.7360 1880.347 14.7360 0.610						14.7360 1192 14.8283 0 14.7360 1221.437 14.7360 -0.853						14.7360 1482 14.8673 0 14.7360 1490.743 14.7360 -0.227
14.7520 1852 14.9900 0 14.7520 1873.856 14.7520 -0.508						14.7520 1219 14.8443 0 14.7520 1216.105 14.7520 0.083						14.7520 1427 14.8833 0 14.7520 1484.685 14.7520 -1.527
14.7680 1826 15.0060 0 14.7680 1867.389 14.7680 -0.969						14.7680 1281 14.8603 0 14.7680 1210.797 14.7680 1.961						14.7680 1455 14.8993 0 14.7680 1478.651 14.7680 -0.620
14.7840 1833 15.0220 0 14.7840 1860.944 14.7840 -0.653						14.7840 1231 14.8763 0 14.7840 1205.512 14.7840 0.726						14.7840 1494 14.9153 0 14.7840 1472.643 14.7840 0.553
14.8000 1814 15.0380 0 14.8000 1854.521 14.8000 -0.951						14.8000 1228 14.8923 0 14.8000 1200.251 14.8000 0.792						14.8000 1530 14.9313 0 14.8000 1466.660 14.8000 1.619
14.8160 1796 15.0540 0 14.8160 1848.122 14.8160 -1.230						14.8160 1208 14.9083 0 14.8160 1195.014 14.8160 0.374						14.8160 1457 14.9473 0 14.8160 1460.700 14.8160 -0.097
14.8320 1899 15.0700 0 14.8320 1841.745 14.8320 1.314						14.8320 1201 14.9243 1 14.8320 1189.800 14.8320 0.323						14.8320 1510 14.9633 2 14.8320 1454.766 14.8320 1.421
14.8480 1794 15.0860 0 14.8480 1835.390 14.8480 -0.977						14.8480 1176 14.9403 0 14.8480 1184.609 14.8480 -0.251						14.8480 1430 14.9793 0 14.8480 1448.855 14.8480 -0.499
14.8640 1816 15.1020 0 14.8640 1829.058 14.8640 -0.306						14.8640 1165 14.9563 0 14.8640 1179.443 14.8640 -0.423						14.8640 1456 14.9953 1 14.8640 1442.969 14.8640 0.341
14.8800 1842 15.1180 0 14.8800 1822.749 14.8800 0.449						14.8800 1183 14.9723 0 14.8800 1174.299 14.8800 0.253						14.8800 1435 15.0113 0 14.8800 1437.108 14.8800 -0.056
14.8960 1861 15.1340 0 14.8960 1816.461 14.8960 1.032						14.8960 1189 14.9883 0 14.8960 1169.178 14.8960 0.575						14.8960 1440 15.0273 0 14.8960 1431.270 14.8960 0.230
14.9120 1799 15.1500 0 14.9120 1810.196 14.9120 -0.264						14.9120 1091 15.0043 0 14.9120 1164.080 14.9120 -2.213						14.9120 1398 15.0433 0 14.9120 1425.456 14.9120 -0.734
14.9280 1847 15.1660 0 14.9280 1803.953 14.9280 1.002						14.9280 1174 15.0203 0 14.9280 1159.005 14.9280 0.438						14.9280 1414 15.0593 0 14.9280 1419.666 14.9280 -0.151
14.9440 1822 15.1820 0 14.9440 1797.731 14.9440 0.569						14.9440 1176 15.0363 0 14.9440 1153.953 14.9440 0.643						14.9440 1363 15.0753 0 14.9440 1413.900 14.9440 -1.379
14.9600 1751 15.1980 0 14.9600 1791.532 14.9600 -0.969						14.9600 1116 15.0523 0 14.9600 1148.924 14.9600 -0.986						14.9600 1380 15.0913 0 14.9600 1408.158 14.9600 -0.758
14.9760 1745 15.2140 0 14.9760 1785.355 14.9760 -0.966						14.9760 1171 15.0683 0 14.9760 1143.917 14.9760 0.791						14.9760 1424 15.1073 0 14.9760 1402.439 14.9760 0.571
14.9920 1788 15.2300 0 14.9920 1779.199 14.9920 0.208						14.9920 1175 15.0843 0 14.9920 1138.933 14.9920 1.052						14.9920 1392 15.1233 0 14.9920 1396.743 14.9920 -0.127
15.0080 1720 15.2460 0 15.0080 1773.065 15.0080 -1.280						15.0080 1069 15.1003 0 15.0080 1133.971 15.0080 -1.987						15.0080 1425 15.1393 0 15.0080 1391.071 15.0080 0.899
15.0240 1776 15.2620 0 15.0240 1766.953 15.0240 0.215						15.0240 1146 15.1163 0 15.0240 1129.032 15.0240 0.501						15.0240 1383 15.1553 0 15.0240 1385.422 15.0240 -0.065
15.0400 1673 15.2780 0 15.0400 1760.862 15.0400 -2.148						15.0400 1147 15.1323 0 15.0400 1124.114 15.0400 0.676						15.0400 1453 15.1713 1 15.0400 1379.797 15.0400 1.920
15.0560 1766 15.2940 0 15.0560 1754.793 15.0560 0.267						15.0560 1105 15.1483 1 15.0560 1119.219 15.0560 -0.428						15.0560 1453 15.1873 0 15.0560 1374.194 15.0560 2.067
15.0720 1806 15.3100 0 15.0720 1748.745 15.0720 1.347						15.0720 1081 15.1643 0 15.0720 1114.346 15.0720 -1.014						15.0720 1457 15.2033 0 15.0720 1368.615 15.0720 2.316
15.0880 1725 15.3260 0 15.0880 1742.719 15.0880 -0.427						15.0880 1092 15.1803 1 15.0880 1109.494 15.0880 -0.529						15.0880 1394 15.2193 0 15.0880 1363.058 15.0880 0.829
15.1040 1729 15.3420 0 15.1040 1736.713 15.1040 -0.186						15.1040 1111 15.1963 0 15.1040 1104.665 15.1040 0.190						15.1040 1356 15.2353 0 15.1040 1357.525 15.1040 -0.041
15.1200 1672 15.3580 0 15.1200 1730.729 15.1200 -1.436						15.1200 1087 15.2123 1 15.1200 1099.857 15.1200 -0.390						15.1200 1377 15.2513 0 15.1200 1352.014 15.1200 0.673
15.1360 1759 15.3740 0 15.1360 1724.766 15.1360 0.816						15.1360 1134 15.2283 0 15.1360 1095.070 15.1360 1.156						15.1360 1374 15.2673 0 15.1360 1346.525 15.1360 0.741
15.1520 1677 15.3900 0 15.1520 1718.824 15.1520 -1.021						15.1520 1050 15.2443 0 15.1520 1090.305 15.1520 -1.244						15.1520 1387 15.2833 0 15.1520 1341.060 15.1520 1.234
15.1680 1620 15.4060 0 15.1680 1712.903 15.1680 -2.308						15.1680 1060 15.2603 0 15.1680 1085.562 15.1680 -0.785						15.1680 1375 15.2993 0 15.1680 1335.616 15.1680 1.062
15.1840 1704 15.4220 0 15.1840 1707.003 15.1840 -0.073						15.1840 1092 15.2763 0 15.1840 1080.840 15.1840 0.338						15.1840 1354 15.3153 0 15.1840 1330.195 15.1840 0.647
15.2000 1675 15.4380 0 15.2000 1701.124 15.2000 -0.638						15.2000 1016 15.2923 0 15.2000 1076.139 15.2000 -1.887						15.2000 1301 15.3313 0 15.2000 1324.796 15.2000 -0.660
15.2160 1696 15.4540 0 15.2160 1695.265 15.2160 0.018						15.2160 1061 15.3083 0 15.2160 1071.459 15.2160 -0.321						15.2160 1313 15.3473 0 15.2160 1319.420 15.2160 -0.177
15.2320 1681 15.4700 0 15.2320 1689.427 15.2320 -0.206						15.2320 1108 15.3243 0 15.2320 1066.800 15.2320 1.238						15.2320 1378 15.3633 0 15.2320 1314.065 15.2320 1.722
15.2480 1660 15.4860 0 15.2480 1683.610 15.2480 -0.579						15.2480 1054 15.3403 0 15.2480 1062.162 15.2480 -0.251						15.2480 1313 15.3793 0 15.2480 1308.732 15.2480 0.118
15.2640 1656 15.5020 0 15.2640 1677.813 15.2640 -0.536						15.2640 1044 15.3563 0 15.2640 1057.545 15.2640 -0.419						15.2640 1277 15.3953 0 15.2640 1303.422 15.2640 -0.739
15.2800 1678 15.5180 0 15.2800 1672.037 15.2800 0.146						15.2800 1058 15.3723 0 15.2800 1052.949 15.2800 0.155						15.2800 1279 15.4113 0 15.2800 1298.133 15.2800 -0.535
15.2960 1668 15.5340 0 15.2960 1666.281 15.2960 0.042						15.2960 999 15.3883 0 15.2960 1048.373 15.2960 -1.561						15.2960 1267 15.4273 0 15.2960 1292.865 15.2960 -0.727
15.3120 1659 15.5500 0 15.3120 1660.545 15.3120 -0.038						15.3120 1051 15.4043 0 15.3120 1043.818 15.3120 0.222						15.3120 1283 15.4433 0 15.3120 1287.620 15.3120 -0.129
15.3280 1717 15.5660 0 15.3280 1654.830 15.3280 1.500						15.3280 1001 15.4203 0 15.3280 1039.284 15.3280 -1.210						15.3280 1301 15.4593 1 15.3280 1282.396 15.3280 0.516
15.3440 1671 15.5820 0 15.3440 1649.135 15.3440 0.535						15.3440 1063 15.4363 0 15.3440 1034.769 15.3440 0.866						15.3440 1251 15.4753 0 15.3440 1277.193 15.3440 -0.741
15.3600 1611 15.5980 0 15.3600 1643.459 15.3600 -0.809						15.3600 1044 15.4523 0 15.3600 1030.275 15.3600 0.425						15.3600 1287 15.4913 0 15.3600 1272.012 15.3600 0.418
15.3760 1661 15.6140 1 15.3760 1637.804 15.3760 0.569						15.3760 1002 15.4683 0 15.3760 1025.802 15.3760 -0.752						15.3760 1218 15.5073 0 15.3760 1266.852 15.3760 -1.400
15.3920 1611 15.6300 0 15.3920 1632.169 15.3920 -0.527						15.3920 1060 15.4843 0 15.3920 1021.348 15.3920 1.187						15.3920 1298 15.5233 0 15.3920 1261.714 15.3920 1.007
15.4080 1557 15.6460 0 15.4080 1626.553 15.4080 -1.763						15.4080 1066 15.5003 0 15.4080 1016.914 15.4080 1.503						15.4080 1284 15.5393 0 15.4080 1256.596 15.4080 0.765
15.4240 1551 15.6620 0 15.4240 1620.958 15.4240 -1.776						15.4240 1030 15.5163 0 15.4240 1012.500 15.4240 0.545						15.4240 1225 15.5553 0 15.4240 1251.499 15.4240 -0.757
15.4400 1549 15.6780 0 15.4400 1615.382 15.4400 -1.687						15.4400 1029 15.5323 0 15.4400 1008.106 15.4400 0.651						15.4400 1239 15.5713 0 15.4400 1246.423 15.4400 -0.211
15.4560 1613 15.6940 0 15.4560 1609.826 15.4560 0.079						15.4560 1022 15.5483 0 15.4560 1003.732 15.4560 0.571						15.4560 1291 15.5873 0 15.4560 1241.369 15.4560 1.381
15.4720 1672 15.7100 0 15.4720 1604.289 15.4720 1.656						15.4720 997 15.5643 0 15.4720 999.377 15.4720 -0.075						15.4720 1231 15.6033 0 15.4720 1236.334 15.4720 -0.152
15.4880 1573 15.7260 0 15.4880 1598.772 15.4880 -0.650						15.4880 950 15.5803 0 15.4880 995.042 15.4880 -1.460						15.4880 1207 15.6193 0 15.4880 1231.321 15.4880 -0.700
15.5040 1554 15.7420 0 15.5040 1593.275 15.5040 -0.996						15.5040 926 15.5963 0 15.5040 990.727 15.5040 -2.125						15.5040 1129 15.6353 0 15.5040 1226.328 15.5040 -2.897
15.5200 1518 15.7580 0 15.5200 1587.796 15.5200 -1.791						15.5200 1055 15.6123 0 15.5200 986.431 15.5200 2.111						15.5200 1143 15.6513 0 15.5200 1221.356 15.5200 -2.318
15.5360 1526 15.7740 1 15.5360 1582.338 15.5360 -1.442						15.5360 999 15.6283 0 15.5360 982.154 15.5360 0.532						15.5360 1207 15.6673 0 15.5360 1216.404 15.5360 -0.271
15.5520 1565 15.7900 0 15.5520 1576.898 15.5520 -0.301						15.5520 967 15.6443 0 15.5520 977.896 15.5520 -0.350						15.5520 1175 15.6833 0 15.5520 1211.472 15.5520 -1.064
15.5680 1574 15.8060 0 15.5680 1571.477 15.5680 0.064						15.5680 941 15.6603 0 15.5680 973.658 15.5680 -1.063						15.5680 1185 15.6993 0 15.5680 1206.561 15.5680 -0.626
15.5840 1609 15.8220 0 15.5840 1566.076 15.5840 1.070						15.5840 986 15.6763 0 15.5840 969.438 15.5840 0.527						15.5840 1186 15.7153 0 15.5840 1201.669 15.5840 -0.455
15.6000 1549 15.8380 0 15.6000 1560.694 15.6000 -0.297						15.6000 972 15.6923 0 15.6000 965.238 15.6000 0.217						15.6000 1197 15.7313 0 15.6000 1196.798 15.6000 0.006
15.6160 1529 15.8540 0 15.6160 1555.330 15.6160 -0.673						15.6160 928 15.7083 0 15.6160 961.056 15.6160 -1.084						15.6160 1198 15.7473 0 15.6160 1191.947 15.6160 0.175
15.6320 1498 15.8700 0 15.6320 1549.986 15.6320 -1.343						15.6320 979 15.7243 0 15.6320 956.893 15.6320 0.706						15.6320 1163 15.7633 0 15.6320 1187.116 15.6320 -0.707
15.6480 1514 15.8860 0 15.6480 1544.660 15.6480 -0.788						15.6480 908 15.7403 0 15.6480 952.749 15.6480 -1.483						15.6480 1169 15.7793 0 15.6480 1182.305 15.6480 -0.389
15.6640 1571 15.9020 0 15.6640 1539.354 15.6640 0.798						15.6640 939 15.7563 0 15.6640 948.623 15.6640 -0.314						15.6640 1162 15.7953 0 15.6640 1177.513 15.6640 -0.455
15.6800 1541 15.9180 0 15.6800 1534.066 15.6800 0.177						15.6800 939 15.7723 0 15.6800 944.516 15.6800 -0.180						15.6800 1141 15.8113 0 15.6800 1172.741 15.6800 -0.940
15.6960 1555 15.9340 0 15.6960 1528.796 15.6960 0.665						15.6960 973 15.7883 0 15.6960 940.427 15.6960 1.043						15.6960 1135 15.8273 0 15.6960 1167.989 15.6960 -0.979
15.7120 1439 15.9500 0 15.7120 1523.545 15.7120 -2.229						15.7120 951 15.8043 0 15.7120 936.357 15.7120 0.474						15.7120 1238 15.8433 0 15.7120 1163.256 15.7120 2.124
15.7280 1486 15.9660 0 15.7280 1518.313 15.7280 -0.838						15.7280 914 15.8203 0 15.7280 932.305 15.7280 -0.605						15.7280 1143 15.8593 0 15.7280 1158.543 15.7280 -0.460
15.7440 1467 15.9820 0 15.7440 1513.099 15.7440 -1.204						15.7440 904 15.8363 0 15.7440 928.272 15.7440 -0.806						15.7440 1155 15.8753 0 15.7440 1153.849 15.7440 0.034
15.7600 1433 15.9980 0 15.7600 1507.904 15.7600 -1.979						15.7600 943 15.8523 0 15.7600 924.256 15.7600 0.610						15.7600 1139 15.8913 1 15.7600 1149.174 15.7600 -0.301
15.7760 1503 16.0140 0 15.7760 1502.727 15.7760 0.007						15.7760 874 15.8683 0 15.7760 920.258 15.7760 -1.563						15.7760 1066 15.9073 0 15.7760 1144.518 15.7760 -2.405
15.7920 1506 16.0300 0 15.7920 1497.568 15.7920 0.217						15.7920 892 15.8843 0 15.7920 916.279 15.7920 -0.812						15.7920 1096 15.9233 1 15.7920 1139.882 15.7920 -1.325
15.8080 1520 16.0460 0 15.8080 1492.427 15.8080 0.707						15.8080 902 15.9003 0 15.8080 912.317 15.8080 -0.343						15.8080 1184 15.9393 0 15.8080 1135.264 15.8080 1.416
15.8240 1453 16.0620 0 15.8240 1487.304 15.8240 -0.900						15.8240 885 15.9163 0 15.8240 908.373 15.8240 -0.785						15.8240 1110 15.9553 0 15.8240 1130.666 15.8240 -0.620
15.8400 1530 16.0780 0 15.8400 1482.200 15.8400 1.222						15.8400 928 15.9323 0 15.8400 904.447 15.8400 0.772						15.8400 1053 15.9713 1 15.8400 1126.086 15.8400 -2.252
15.8560 1477 16.0940 0 15.8560 1477.113 15.8560 -0.003						15.8560 890 15.9483 0 15.8560 900.538 15.8560 -0.353						15.8560 1109 15.9873 0 15.8560 1121.525 15.8560 -0.376
15.8720 1478 16.1100 0 15.8720 1472.045 15.8720 0.155						15.8720 938 15.9643 1 15.8720 896.647 15.8720 1.349						15.8720 1180 16.0033 0 15.8720 1116.983 15.8720 1.834
15.8880 1404 16.1260 0 15.8880 1466.994 15.8880 -1.681						15.8880 898 15.9803 0 15.8880 892.773 15.8880 0.174						15.8880 1103 16.0193 0 15.8880 1112.460 15.8880 -0.285
15.9040 1420 16.1420 0 15.9040 1461.961 15.9040 -1.114						15.9040 890 15.9963 0 15.9040 888.917 15.9040 0.036						15.9040 1097 16.0353 0 15.9040 1107.955 15.9040 -0.331
15.9200 1365 16.1580 0 15.9200 1456.946 15.9200 -2.489						15.9200 861 16.0123 0 15.9200 885.078 15.9200 -0.820						15.9200 1151 16.0513 0 15.9200 1103.469 15.9200 1.401
15.9360 1427 16.1740 0 15.9360 1451.949 15.9360 -0.660						15.9360 906 16.0283 0 15.9360 881.257 15.9360 0.821						15.9360 1123 16.0673 0 15.9360 1099.001 15.9360 0.716
15.9520 1350 16.1900 1 15.9520 1446.969 15.9520 -2.639						15.9520 830 16.0443 0 15.9520 877.452 15.9520 -1.645						15.9520 1090 16.0833 1 15.9520 1094.551 15.9520 -0.138
15.9680 1410 16.2060 0 15.9680 1442.006 15.9680 -0.852						15.9680 847 16.0603 0 15.9680 873.665 15.9680 -0.915						15.9680 1064 16.0993 0 15.9680 1090.120 15.9680 -0.801
15.9840 1439 16.2220 0 15.9840 1437.062 15.9840 0.051						15.9840 898 16.0763 1 15.9840 869.895 15.9840 0.937						15.9840 1102 16.1153 0 15.9840 1085.707 15.9840 0.491
16.0000 1397 16.2380 0 16.0000 1432.134 16.0000 -0.940						16.0000 845 16.0923 0 16.0000 866.141 16.0000 -0.726						16.0000 1123 16.1313 0 16.0000 1081.312 16.0000 1.244
16.0160 1465 16.2540 0 16.0160 1427.224 16.0160 0.987						16.0160 876 16.1083 0 16.0160 862.405 16.0160 0.459						16.0160 1024 16.1473 0 16.0160 1076.935 16.0160 -1.654
16.0320 1422 16.2700 0 16.0320 1422.332 16.0320 -0.009						16.0320 847 16.1243 0 16.0320 858.685 16.0320 -0.401						16.0320 1053 16.1633 0 16.0320 1072.576 16.0320 -0.603
16.0480 1419 16.2860 0 16.0480 1417.456 16.0480 0.041						16.0480 865 16.1403 0 16.0480 854.982 16.0480 0.340						16.0480 1022 16.1793 0 16.0480 1068.235 16.0480 -1.446
16.0640 1373 16.3020 0 16.0640 1412.598 16.0640 -1.069						16.0640 835 16.1563 0 16.0640 851.295 16.0640 -0.563						16.0640 1016 16.1953 0 16.0640 1063.911 16.0640 -1.503
16.0800 1381 16.3180 0 16.0800 1407.757 16.0800 -0.720						16.0800 855 16.1723 0 16.0800 847.625 16.0800 0.252						16.0800 1054 16.2113 0 16.0800 1059.606 16.0800 -0.173
16.0960 1463 16.3340 0 16.0960 1402.933 16.0960 1.570						16.0960 835 16.1883 0 16.0960 843.972 16.0960 -0.310						16.0960 995 16.2273 0 16.0960 1055.318 16.0960 -1.910
16.1120 1342 16.3500 0 16.1120 1398.126 16.1120 -1.532						16.1120 884 16.2043 0 16.1120 840.335 16.1120 1.467						16.1120 1043 16.2433 0 16.1120 1051.048 16.1120 -0.249
16.1280 1359 16.3660 0 16.1280 1393.336 16.1280 -0.931						16.1280 822 16.2203 0 16.1280 836.714 16.1280 -0.513						16.1280 1036 16.2593 0 16.1280 1046.795 16.1280 -0.335
16.1440 1379 16.3820 0 16.1440 1388.563 16.1440 -0.258						16.1440 828 16.2363 0 16.1440 833.110 16.1440 -0.177						16.1440 1081 16.2753 0 16.1440 1042.560 16.1440 1.169
16.1600 1332 16.3980 0 16.1600 1383.807 16.1600 -1.419						16.1600 865 16.2523 0 16.1600 829.522 16.1600 1.205						16.1600 1060 16.2913 0 16.1600 1038.342 16.1600 0.665
16.1760 1441 16.4140 0 16.1760 1379.067 16.1760 1.632						16.1760 816 16.2683 0 16.1760 825.950 16.1760 -0.348						16.1760 1019 16.3073 0 16.1760 1034.141 16.1760 -0.474
16.1920 1372 16.4300 0 16.1920 1374.344 16.1920 -0.063						16.1920 833 16.2843 0 16.1920 822.394 16.1920 0.367						16.1920 1051 16.3233 0 16.1920 1029.958 16.1920 0.649
16.2080 1297 16.4460 0 16.2080 1369.638 16.2080 -2.017						16.2080 763 16.3003 1 16.2080 818.854 16.2080 -2.019						16.2080 986 16.3393 0 16.2080 1025.792 16.2080 -1.266
16.2240 1332 16.4620 0 16.2240 1364.949 16.2240 -0.903						16.2240 842 16.3163 0 16.2240 815.329 16.2240 0.918						16.2240 1031 16.3553 0 16.2240 1021.643 16.2240 0.291
16.2400 1285 16.4780 0 16.2400 1360.276 16.2400 -2.100						16.2400 802 16.3323 0 16.2400 811.821 16.2400 -0.346						16.2400 1011 16.3713 0 16.2400 1017.511 16.2400 -0.205
16.2560 1259 16.4940 0 16.2560 1355.619 16.2560 -2.723						16.2560 816 16.3483 0 16.2560 808.329 16.2560 0.268						16.2560 1076 16.3873 0 16.2560 1013.396 16.2560 1.909
16.2720 1302 16.5100 0 16.2720 1350.979 16.2720 -1.357						16.2720 809 16.3643 0 16.2720 804.852 16.2720 0.146						16.2720 1043 16.4033 0 16.2720 1009.298 16.2720 1.044
16.2880 1411 16.5260 0 16.2880 1346.355 16.2880 1.721						16.2880 786 16.3803 0 16.2880 801.391 16.2880 -0.548						16.2880 1018 16.4193 0 16.2880 1005.216 16.2880 0.401
16.3040 1295 16.5420 0 16.3040 1341.748 16.3040 -1.299						16.3040 766 16.3963 0 16.3040 797.945 16.3040 -1.153						16.3040 1023 16.4353 0 16.3040 1001.152 16.3040 0.683
16.3200 1404 16.5580 0 16.3200 1337.157 16.3200 1.784						16.3200 778 16.4123 0 16.3200 794.515 16.3200 -0.591						16.3200 997 16.4513 0 16.3200 997.104 16.3200 -0.003
16.3360 1368 16.5740 0 16.3360 1332.582 16.3360 0.958						16.3360 761 16.4283 0 16.3360 791.100 16.3360 -1.090						16.3360 1008 16.4673 0 16.3360 993.073 16.3360 0.470
16.3520 1315 16.5900 0 16.3520 1328.023 16.3520 -0.359						16.3520 796 16.4443 0 16.3520 787.700 16.3520 0.294						16.3520 1007 16.4833 0 16.3520 989.058 16.3520 0.565
16.3680 1295 16.6060 0 16.3680 1323.480 16.3680 -0.791						16.3680 784 16.4603 0 16.3680 784.316 16.3680 -0.011						16.3680 982 16.4993 0 16.3680 985.060 16.3680 -0.098
16.3840 1322 16.6220 0 16.3840 1318.953 16.3840 0.084						16.3840 764 16.4763 0 16.3840 780.947 16.3840 -0.612						16.3840 939 16.5153 1 16.3840 981.078 16.3840 -1.372
16.4000 1348 16.6380 0 16.4000 1314.443 16.4000 0.914						16.4000 746 16.4923 0 16.4000 777.593 16.4000 -1.155						16.4000 972 16.5313 0 16.4000 977.113 16.4000 -0.164
16.4160 1248 16.6540 0 16.4160 1309.948 16.4160 -1.754						16.4160 756 16.5083 0 16.4160 774.254 16.4160 -0.663						16.4160 966 16.5473 0 16.4160 973.164 16.4160 -0.230
16.4320 1263 16.6700 0 16.4320 1305.469 16.4320 -1.195						16.4320 796 16.5243 0 16.4320 770.930 16.4320 0.887						16.4320 913 16.5633 0 16.4320 969.231 16.4320 -1.859
16.4480 1230 16.6860 0 16.4480 1301.005 16.4480 -2.025						16.4480 810 16.5403 0 16.4480 767.622 16.4480 1.487						16.4480 1009 16.5793 0 16.4480 965.314 16.4480 1.375
16.4640 1254 16.7020 0 16.4640 1296.558 16.4640 -1.202						16.4640 757 16.5563 0 16.4640 764.328 16.4640 -0.266						16.4640 962 16.5953 0 16.4640 961.413 16.4640 0.019
16.4800 1292 16.7180 0 16.4800 1292.126 16.4800 -0.004						16.4800 783 16.5723 0 16.4800 761.048 16.4800 0.783						16.4800 938 16.6113 0 16.4800 957.528 16.4800 -0.637
16.4960 1319 16.7340 0 16.4960 1287.710 16.4960 0.862						16.4960 756 16.5883 0 16.4960 757.784 16.4960 -0.065						16.4960 928 16.6273 0 16.4960 953.660 16.4960 -0.841
16.5120 1262 16.7500 0 16.5120 1283.309 16.5120 -0.600						16.5120 741 16.6043 0 16.5120 754.534 16.5120 -0.497						16.5120 911 16.6433 0 16.5120 949.807 16.5120 -1.284
16.5280 1343 16.7660 0 16.5280 1278.924 16.5280 1.748						16.5280 742 16.6203 0 16.5280 751.299 16.5280 -0.341						16.5280 935 16.6593 0 16.5280 945.970 16.5280 -0.358
16.5440 1275 16.7820 0 16.5440 1274.555 16.5440 0.012						16.5440 728 16.6363 0 16.5440 748.078 16.5440 -0.743						16.5440 961 16.6753 0 16.5440 942.148 16.5440 0.607
16.5600 1245 16.7980 0 16.5600 1270.200 16.5600 -0.714						16.5600 732 16.6523 0 16.5600 744.872 16.5600 -0.475						16.5600 977 16.6913 0 16.5600 938.343 16.5600 1.235
16.5760 1297 16.8140 0 16.5760 1265.862 16.5760 0.865						16.5760 708 16.6683 0 16.5760 741.680 16.5760 -1.264						16.5760 953 16.7073 0 16.5760 934.553 16.5760 0.597
16.5920 1256 16.8300 0 16.5920 1261.538 16.5920 -0.156						16.5920 771 16.6843 0 16.5920 738.502 16.5920 1.169						16.5920 910 16.7233 0 16.5920 930.779 16.5920 -0.688
16.6080 1224 16.8460 0 16.6080 1257.230 16.6080 -0.950						16.6080 733 16.7003 0 16.6080 735.339 16.6080 -0.086						16.6080 928 16.7393 0 16.6080 927.020 16.6080 0.032
16.6240 1175 16.8620 0 16.6240 1252.937 16.6240 -2.274						16.6240 750 16.7163 0 16.6240 732.190 16.6240 0.649						16.6240 876 16.7553 0 16.6240 923.276 16.6240 -1.595
16.6400 1308 16.8780 0 16.6400 1248.659 16.6400 1.641						16.6400 707 16.7323 0 16.6400 729.055 16.6400 -0.828						16.6400 965 16.7713 0 16.6400 919.548 16.6400 1.462
16.6560 1245 16.8940 0 16.6560 1244.396 16.6560 0.017						16.6560 744 16.7483 0 16.6560 725.934 16.6560 0.661						16.6560 935 16.7873 0 16.6560 915.835 16.6560 0.626
16.6720 1219 16.9100 0 16.6720 1240.148 16.6720 -0.606						16.6720 782 16.7643 0 16.6720 722.828 16.6720 2.113						16.6720 930 16.8033 0 16.6720 912.138 16.6720 0.585
16.6880 1223 16.9260 0 16.6880 1235.915 16.6880 -0.369						16.6880 716 16.7803 0 16.6880 719.735 16.6880 -0.139						16.6880 918 16.8193 0 16.6880 908.455 16.6880 0.315
16.7040 1221 16.9420 0 16.7040 1231.697 16.7040 -0.306						16.7040 724 16.7963 0 16.7040 716.656 16.7040 0.273						16.7040 882 16.8353 0 16.7040 904.788 16.7040 -0.766
16.7200 1208 16.9580 0 16.7200 1227.494 16.7200 -0.561						16.7200 702 16.8123 0 16.7200 713.591 16.7200 -0.437						16.7200 850 16.8513 0 16.7200 901.136 16.7200 -1.752
16.7360 1177 16.9740 0 16.7360 1223.306 16.7360 -1.350						16.7360 697 16.8283 0 16.7360 710.539 16.7360 -0.512						16.7360 923 16.8673 0 16.7360 897.499 16.7360 0.838
16.7520 1209 16.9900 0 16.7520 1219.132 16.7520 -0.291						16.7520 685 16.8443 0 16.7520 707.502 16.7520 -0.858						16.7520 913 16.8833 0 16.7520 893.876 16.7520 0.632
16.7680 1235 17.0060 0 16.7680 1214.973 16.7680 0.570						16.7680 730 16.8603 0 16.7680 704.478 16.7680 0.943						16.7680 925 16.8993 0 16.7680 890.269 16.7680 1.141
16.7840 1168 17.0220 0 16.7840 1210.829 16.7840 -1.253						16.7840 727 16.8763 0 16.7840 701.467 16.7840 0.946						16.7840 927 16.9153 0 16.7840 886.676 16.7840 1.323
16.8000 1217 17.0380 0 16.8000 1206.700 16.8000 0.295						16.8000 732 16.8923 0 16.8000 698.470 16.8000 1.238						16.8000 887 16.9313 0 16.8000 883.099 16.8000 0.131
16.8160 1176 17.0540 0 16.8160 1202.585 16.8160 -0.775						16.8160 710 16.9083 0 16.8160 695.487 16.8160 0.544						16.8160 927 16.9473 0 16.8160 879.535 16.8160 1.557
16.8320 1179 17.0700 0 16.8320 1198.484 16.8320 -0.567						16.8320 716 16.9243 0 16.8320 692.517 16.8320 0.876						16.8320 828 16.9633 0 16.8320 875.987 16.8320 -1.666
16.8480 1147 17.0860 0 16.8480 1194.398 16.8480 -1.400						16.8480 716 16.9403 0 16.8480 689.560 16.8480 0.987						16.8480 850 16.9793 0 16.8480 872.453 16.8480 -0.769
16.8640 1146 17.1020 0 16.8640 1190.327 16.8640 -1.309						16.8640 655 16.9563 0 16.8640 686.617 16.8640 -1.233						16.8640 869 16.9953 0 16.8640 868.933 16.8640 0.002
16.8800 1211 17.1180 0 16.8800 1186.270 16.8800 0.711						16.8800 741 16.9723 0 16.8800 683.687 16.8800 2.103						16.8800 862 17.0113 0 16.8800 865.428 16.8800 -0.117
16.8960 1154 17.1340 0 16.8960 1182.227 16.8960 -0.831						16.8960 664 16.9883 0 16.8960 680.770 16.8960 -0.650						16.8960 892 17.0273 0 16.8960 861.938 16.8960 1.005
16.9120 1155 17.1500 1 16.9120 1178.198 16.9120 -0.683						16.9120 650 17.0043 0 16.9120 677.866 16.9120 -1.091						16.9120 817 17.0433 0 16.9120 858.462 16.9120 -1.449
16.9280 1137 17.1660 0 16.9280 1174.184 16.9280 -1.103						16.9280 699 17.0203 0 16.9280 674.975 16.9280 0.907						16.9280 928 17.0593 0 16.9280 855.000 16.9280 2.394
16.9440 1207 17.1820 1 16.9440 1170.184 16.9440 1.060						16.9440 683 17.0363 0 16.9440 672.097 16.9440 0.417						16.9440 903 17.0753 0 16.9440 851.552 16.9440 1.710
16.9600 1132 17.1980 0 16.9600 1166.198 16.9600 -1.016						16.9600 680 17.0523 0 16.9600 669.232 16.9600 0.412						16.9600 873 17.0913 0 16.9600 848.118 16.9600 0.841
16.9760 1206 17.2140 0 16.9760 1162.225 16.9760 1.261						16.9760 633 17.0683 0 16.9760 666.380 16.9760 -1.325						16.9760 890 17.1073 0 16.9760 844.699 16.9760 1.517
16.9920 1167 17.2300 0 16.9920 1158.267 16.9920 0.256						16.9920 705 17.0843 0 16.9920 663.541 16.9920 1.559						16.9920 805 17.1233 0 16.9920 841.293 16.9920 -1.278
17.0080 1110 17.2460 0 17.0080 1154.323 17.0080 -1.330						17.0080 702 17.1003 0 17.0080 660.714 17.0080 1.556						17.0080 871 17.1393 0 17.0080 837.901 17.0080 1.120
17.0240 1126 17.2620 0 17.0240 1150.393 17.0240 -0.727						17.0240 661 17.1163 0 17.0240 657.900 17.0240 0.120						17.0240 876 17.1553 0 17.0240 834.524 17.0240 1.400
17.0400 1121 17.2780 0 17.0400 1146.477 17.0400 -0.761						17.0400 661 17.1323 0 17.0400 655.099 17.0400 0.229						17.0400 812 17.1713 0 17.0400 831.160 17.0400 -0.672
17.0560 1206 17.2940 0 17.0560 1142.574 17.0560 1.826						17.0560 632 17.1483 0 17.0560 652.311 17.0560 -0.807						17.0560 836 17.1873 0 17.0560 827.810 17.0560 0.283
17.0720 1168 17.3100 0 17.0720 1138.685 17.0720 0.858						17.0720 642 17.1643 0 17.0720 649.534 17.0720 -0.297						17.0720 785 17.2033 0 17.0720 824.474 17.0720 -1.407
17.0880 1144 17.3260 0 17.0880 1134.810 17.0880 0.272						17.0880 627 17.1803 0 17.0880 646.771 17.0880 -0.788						17.0880 789 17.2193 0 17.0880 821.152 17.0880 -1.143
17.1040 1094 17.3420 0 17.1040 1130.949 17.1040 -1.117						17.1040 615 17.1963 0 17.1040 644.020 17.1040 -1.168						17.1040 837 17.2353 0 17.1040 817.843 17.1040 0.661
17.1200 1122 17.3580 0 17.1200 1127.101 17.1200 -0.152						17.1200 655 17.2123 0 17.1200 641.281 17.1200 0.535						17.1200 829 17.2513 0 17.1200 814.548 17.1200 0.501
17.1360 1067 17.3740 0 17.1360 1123.267 17.1360 -1.723						17.1360 655 17.2283 0 17.1360 638.554 17.1360 0.642						17.1360 857 17.2673 0 17.1360 811.266 17.1360 1.560
17.1520 1133 17.3900 0 17.1520 1119.446 17.1520 0.403						17.1520 634 17.2443 0 17.1520 635.840 17.1520 -0.073						17.1520 802 17.2833 0 17.1520 807.998 17.1520 -0.212
17.1680 1068 17.4060 0 17.1680 1115.639 17.1680 -1.458						17.1680 681 17.2603 0 17.1680 633.138 17.1680 1.831						17.1680 779 17.2993 0 17.1680 804.743 17.1680 -0.921
17.1840 1151 17.4220 0 17.1840 1111.845 17.1840 1.154						17.1840 614 17.2763 0 17.1840 630.448 17.1840 -0.663						17.1840 793 17.3153 0 17.1840 801.501 17.1840 -0.302
17.2000 1163 17.4380 0 17.2000 1108.065 17.2000 1.611						17.2000 597 17.2923 0 17.2000 627.770 17.2000 -1.257						17.2000 830 17.3313 0 17.2000 798.273 17.2000 1.100
17.2160 1136 17.4540 0 17.2160 1104.297 17.2160 0.941						17.2160 641 17.3083 0 17.2160 625.104 17.2160 0.627						17.2160 759 17.3473 0 17.2160 795.058 17.2160 -1.307
17.2320 1079 17.4700 0 17.2320 1100.544 17.2320 -0.656						17.2320 614 17.3243 0 17.2320 622.450 17.2320 -0.340						17.2320 815 17.3633 0 17.2320 791.857 17.2320 0.810
17.2480 1112 17.4860 0 17.2480 1096.803 17.2480 0.456						17.2480 628 17.3403 0 17.2480 619.808 17.2480 0.326						17.2480 750 17.3793 0 17.2480 788.668 17.2480 -1.410
17.2640 1058 17.5020 0 17.2640 1093.076 17.2640 -1.078						17.2640 686 17.3563 0 17.2640 617.178 17.2640 2.624						17.2640 796 17.3953 0 17.2640 785.493 17.2640 0.372
17.2800 1074 17.5180 0 17.2800 1089.361 17.2800 -0.469						17.2800 642 17.3723 0 17.2800 614.560 17.2800 1.081						17.2800 809 17.4113 0 17.2800 782.330 17.2800 0.937
17.2960 1091 17.5340 0 17.2960 1085.660 17.2960 0.162						17.2960 587 17.3883 0 17.2960 611.953 17.2960 -1.028						17.2960 806 17.4273 0 17.2960 779.181 17.2960 0.944
17.3120 1075 17.5500 0 17.3120 1081.972 17.3120 -0.213						17.3120 583 17.4043 0 17.3120 609.359 17.3120 -1.090						17.3120 754 17.4433 0 17.3120 776.044 17.3120 -0.802
17.3280 1086 17.5660 1 17.3280 1078.297 17.3280 0.234						17.3280 609 17.4203 0 17.3280 606.776 17.3280 0.090						17.3280 809 17.4593 0 17.3280 772.921 17.3280 1.267
17.3440 1115 17.5820 0 17.3440 1074.635 17.3440 1.209						17.3440 646 17.4363 0 17.3440 604.204 17.3440 1.642						17.3440 765 17.4753 0 17.3440 769.810 17.3440 -0.174
17.3600 1051 17.5980 0 17.3600 1070.986 17.3600 -0.616						17.3600 599 17.4523 0 17.3600 601.644 17.3600 -0.108						17.3600 754 17.4913 0 17.3600 766.712 17.3600 -0.462
17.3760 1051 17.6140 1 17.3760 1067.349 17.3760 -0.504						17.3760 604 17.4683 0 17.3760 599.095 17.3760 0.199						17.3760 752 17.5073 0 17.3760 763.627 17.3760 -0.423
17.3920 1024 17.6300 0 17.3920 1063.726 17.3920 -1.241						17.3920 613 17.4843 0 17.3920 596.558 17.3920 0.663						17.3920 838 17.5233 0 17.3920 760.554 17.3920 2.672
17.4080 1042 17.6460 0 17.4080 1060.115 17.4080 -0.561						17.4080 610 17.5003 0 17.4080 594.033 17.4080 0.645						17.4080 780 17.5393 0 17.4080 757.494 17.4080 0.805
17.4240 1054 17.6620 0 17.4240 1056.517 17.4240 -0.078						17.4240 558 17.5163 0 17.4240 591.518 17.4240 -1.416						17.4240 788 17.5553 0 17.4240 754.447 17.4240 1.194
17.4400 1034 17.6780 0 17.4400 1052.932 17.4400 -0.589						17.4400 584 17.5323 0 17.4400 589.015 17.4400 -0.207						17.4400 747 17.5713 0 17.4400 751.412 17.4400 -0.161
17.4560 1089 17.6940 0 17.4560 1049.359 17.4560 1.201						17.4560 614 17.5483 0 17.4560 586.524 17.4560 1.107						17.4560 738 17.5873 0 17.4560 748.389 17.4560 -0.382
17.4720 1048 17.7100 0 17.4720 1045.799 17.4720 0.068						17.4720 593 17.5643 0 17.4720 584.043 17.4720 0.367						17.4720 731 17.6033 0 17.4720 745.379 17.4720 -0.531
17.4880 1079 17.7260 0 17.4880 1042.252 17.4880 1.119						17.4880 587 17.5803 0 17.4880 581.574 17.4880 0.224						17.4880 710 17.6193 0 17.4880 742.381 17.4880 -1.214
17.5040 1018 17.7420 0 17.5040 1038.717 17.5040 -0.649						17.5040 569 17.5963 0 17.5040 579.115 17.5040 -0.423						17.5040 807 17.6353 0 17.5040 739.396 17.5040 2.377
17.5200 992 17.7580 0 17.5200 1035.194 17.5200 -1.370						17.5200 581 17.6123 0 17.5200 576.668 17.5200 0.179						17.5200 714 17.6513 0 17.5200 736.423 17.5200 -0.838
17.5360 1037 17.7740 0 17.5360 1031.684 17.5360 0.165						17.5360 591 17.6283 0 17.5360 574.232 17.5360 0.689						17.5360 698 17.6673 0 17.5360 733.462 17.5360 -1.340
17.5520 1021 17.7900 0 17.5520 1028.187 17.5520 -0.225						17.5520 584 17.6443 0 17.5520 571.806 17.5520 0.504						17.5520 750 17.6833 0 17.5520 730.513 17.5520 0.711
17.5680 1038 17.8060 0 17.5680 1024.701 17.5680 0.413						17.5680 593 17.6603 0 17.5680 569.392 17.5680 0.968						17.5680 691 17.6993 1 17.5680 727.576 17.5680 -1.389
17.5840 1015 17.8220 0 17.5840 1021.228 17.5840 -0.195						17.5840 593 17.6763 0 17.5840 566.988 17.5840 1.066						17.5840 720 17.7153 1 17.5840 724.652 17.5840 -0.173
17.6000 1033 17.8380 0 17.6000 1017.767 17.6000 0.474						17.6000 594 17.6923 0 17.6000 564.595 17.6000 1.204						17.6000 720 17.7313 0 17.6000 721.739 17.6000 -0.065
17.6160 1018 17.8540 0 17.6160 1014.319 17.6160 0.115						17.6160 562 17.7083 0 17.6160 562.213 17.6160 -0.009						17.6160 721 17.7473 0 17.6160 718.839 17.6160 0.080
17.6320 974 17.8700 0 17.6320 1010.882 17.6320 -1.181						17.6320 577 17.7243 0 17.6320 559.842 17.6320 0.713						17.6320 717 17.7633 0 17.6320 715.950 17.6320 0.039
17.6480 1026 17.8860 0 17.6480 1007.458 17.6480 0.579						17.6480 553 17.7403 0 17.6480 557.481 17.6480 -0.190						17.6480 694 17.7793 1 17.6480 713.073 17.6480 -0.723
17.6640 982 17.9020 0 17.6640 1004.046 17.6640 -0.703						17.6640 587 17.7563 0 17.6640 555.131 17.6640 1.313						17.6640 722 17.7953 0 17.6640 710.208 17.6640 0.438
17.6800 961 17.9180 0 17.6800 1000.645 17.6800 -1.278						17.6800 545 17.7723 0 17.6800 552.791 17.6800 -0.333						17.6800 711 17.8113 0 17.6800 707.354 17.6800 0.137
17.6960 946 17.9340 1 17.6960 997.257 17.6960 -1.665						17.6960 519 17.7883 0 17.6960 550.462 17.6960 -1.378						17.6960 704 17.8273 0 17.6960 704.513 17.6960 -0.019
17.7120 1034 17.9500 0 17.7120 993.881 17.7120 1.248						17.7120 541 17.8043 0 17.7120 548.144 17.7120 -0.307						17.7120 751 17.8433 0 17.7120 701.683 17.7120 1.797
17.7280 992 17.9660 0 17.7280 990.516 17.7280 0.047						17.7280 578 17.8203 1 17.7280 545.835 17.7280 1.336						17.7280 686 17.8593 0 17.7280 698.865 17.7280 -0.490
17.7440 959 17.9820 0 17.7440 987.164 17.7440 -0.909						17.7440 553 17.8363 0 17.7440 543.538 17.7440 0.402						17.7440 753 17.8753 0 17.7440 696.058 17.7440 2.072
17.7600 1017 17.9980 0 17.7600 983.823 17.7600 1.040						17.7600 574 17.8523 0 17.7600 541.250 17.7600 1.365						17.7600 686 17.8913 0 17.7600 693.263 17.7600 -0.277
17.7760 968 18.0140 0 17.7760 980.494 17.7760 -0.401						17.7760 547 17.8683 0 17.7760 538.973 17.7760 0.343						17.7760 714 17.9073 0 17.7760 690.479 17.7760 0.879
17.7920 967 18.0300 0 17.7920 977.177 17.7920 -0.327						17.7920 523 17.8843 0 17.7920 536.706 17.7920 -0.598						17.7920 712 17.9233 0 17.7920 687.707 17.7920 0.909
17.8080 953 18.0460 0 17.8080 973.872 17.8080 -0.675						17.8080 565 17.9003 0 17.8080 534.449 17.8080 1.283						17.8080 717 17.9393 0 17.8080 684.946 17.8080 1.195
17.8240 1004 18.0620 0 17.8240 970.578 17.8240 1.055						17.8240 542 17.9163 0 17.8240 532.202 17.8240 0.420						17.8240 678 17.9553 0 17.8240 682.196 17.8240 -0.161
17.8400 943 18.0780 0 17.8400 967.296 17.8400 -0.790						17.8400 562 17.9323 0 17.8400 529.966 17.8400 1.349						17.8400 654 17.9713 0 17.8400 679.458 17.8400 -0.994
17.8560 965 18.0940 0 17.8560 964.025 17.8560 0.031						17.8560 564 17.9483 0 17.8560 527.739 17.8560 1.524						17.8560 648 17.9873 0 17.8560 676.731 17.8560 -1.127
17.8720 967 18.1100 0 17.8720 960.766 17.8720 0.200						17.8720 550 17.9643 0 17.8720 525.523 17.8720 1.042						17.8720 687 18.0033 0 17.8720 674.015 17.8720 0.495
17.8880 1009 18.1260 0 17.8880 957.518 17.8880 1.621						17.8880 516 17.9803 0 17.8880 523.316 17.8880 -0.321						17.8880 698 18.0193 0 17.8880 671.310 17.8880 1.009
17.9040 993 18.1420 0 17.9040 954.282 17.9040 1.227						17.9040 522 17.9963 0 17.9040 521.119 17.9040 0.038						17.9040 632 18.0353 0 17.9040 668.617 17.9040 -1.454
17.9200 965 18.1580 0 17.9200 951.057 17.9200 0.448						17.9200 513 18.0123 0 17.9200 518.933 17.9200 -0.261						17.9200 627 18.0513 0 17.9200 665.934 17.9200 -1.552
17.9360 971 18.1740 0 17.9360 947.844 17.9360 0.742						17.9360 544 18.0283 0 17.9360 516.756 17.9360 1.166						17.9360 634 18.0673 0 17.9360 663.263 17.9360 -1.160
17.9520 875 18.1900 0 17.9520 944.642 17.9520 -2.352						17.9520 551 18.0443 0 17.9520 514.588 17.9520 1.548						17.9520 672 18.0833 0 17.9520 660.602 17.9520 0.439
17.9680 983 18.2060 0 17.9680 941.451 17.9680 1.324						17.9680 498 18.0603 0 17.9680 512.431 17.9680 -0.645						17.9680 640 18.0993 0 17.9680 657.952 17.9680 -0.709
17.9840 989 18.2220 0 17.9840 938.272 17.9840 1.611						17.9840 534 18.0763 0 17.9840 510.283 17.9840 1.024						17.9840 629 18.1153 0 17.9840 655.314 17.9840 -1.048
18.0000 877 18.2380 0 18.0000 935.103 18.0000 -1.960						18.0000 518 18.0923 0 18.0000 508.145 18.0000 0.432						18.0000 688 18.1313 0 18.0000 652.686 18.0000 1.344
18.0160 988 18.2540 0 18.0160 931.946 18.0160 1.782						18.0160 492 18.1083 0 18.0160 506.016 18.0160 -0.631						18.0160 665 18.1473 0 18.0160 650.068 18.0160 0.578
18.0320 916 18.2700 0 18.0320 928.800 18.0320 -0.422						18.0320 496 18.1243 0 18.0320 503.898 18.0320 -0.354						18.0320 709 18.1633 0 18.0320 647.462 18.0320 2.308
18.0480 928 18.2860 0 18.0480 925.665 18.0480 0.077						18.0480 547 18.1403 0 18.0480 501.788 18.0480 1.930						18.0480 653 18.1793 0 18.0480 644.866 18.0480 0.318
18.0640 862 18.3020 0 18.0640 922.542 18.0640 -2.060						18.0640 546 18.1563 0 18.0640 499.688 18.0640 1.978						18.0640 657 18.1953 0 18.0640 642.281 18.0640 0.573
18.0800 953 18.3180 0 18.0800 919.429 18.0800 1.086						18.0800 470 18.1723 0 18.0800 497.598 18.0800 -1.270						18.0800 604 18.2113 0 18.0800 639.707 18.0800 -1.451
18.0960 960 18.3340 0 18.0960 916.327 18.0960 1.408						18.0960 531 18.1883 0 18.0960 495.516 18.0960 1.537						18.0960 595 18.2273 0 18.0960 637.143 18.0960 -1.725
18.1120 854 18.3500 0 18.1120 913.236 18.1120 -2.025						18.1120 490 18.2043 0 18.1120 493.445 18.1120 -0.155						18.1120 670 18.2433 0 18.1120 634.590 18.1120 1.366
18.1280 938 18.3660 0 18.1280 910.156 18.1280 0.908						18.1280 486 18.2203 0 18.1280 491.382 18.1280 -0.244						18.1280 637 18.2593 0 18.1280 632.047 18.1280 0.196
18.1440 902 18.3820 0 18.1440 907.087 18.1440 -0.169						18.1440 489 18.2363 0 18.1440 489.329 18.1440 -0.015						18.1440 644 18.2753 0 18.1440 629.515 18.1440 0.570
18.1600 883 18.3980 0 18.1600 904.029 18.1600 -0.707						18.1600 511 18.2523 0 18.1600 487.285 18.1600 1.047						18.1600 624 18.2913 0 18.1600 626.992 18.1600 -0.120
18.1760 878 18.4140 0 18.1760 900.981 18.1760 -0.775						18.1760 506 18.2683 0 18.1760 485.250 18.1760 0.921						18.1760 608 18.3073 0 18.1760 624.481 18.1760 -0.667
18.1920 888 18.4300 0 18.1920 897.944 18.1920 -0.333						18.1920 478 18.2843 0 18.1920 483.224 18.1920 -0.238						18.1920 617 18.3233 1 18.1920 621.979 18.1920 -0.200
18.2080 828 18.4460 0 18.2080 894.918 18.2080 -2.323						18.2080 486 18.3003 0 18.2080 481.208 18.2080 0.217						18.2080 590 18.3393 0 18.2080 619.488 18.2080 -1.212
18.2240 882 18.4620 0 18.2240 891.903 18.2240 -0.333						18.2240 500 18.3163 0 18.2240 479.200 18.2240 0.928						18.2240 584 18.3553 0 18.2240 617.008 18.2240 -1.364
18.2400 905 18.4780 0 18.2400 888.898 18.2400 0.535						18.2400 501 18.3323 0 18.2400 477.202 18.2400 1.061						18.2400 647 18.3713 0 18.2400 614.537 18.2400 1.274
18.2560 807 18.4940 0 18.2560 885.904 18.2560 -2.774						18.2560 480 18.3483 0 18.2560 475.212 18.2560 0.218						18.2560 609 18.3873 0 18.2560 612.076 18.2560 -0.124
18.2720 848 18.5100 0 18.2720 882.920 18.2720 -1.198						18.2720 473 18.3643 0 18.2720 473.231 18.2720 -0.011						18.2720 625 18.4033 0 18.2720 609.626 18.2720 0.614
18.2880 901 18.5260 0 18.2880 879.947 18.2880 0.701						18.2880 484 18.3803 1 18.2880 471.260 18.2880 0.578						18.2880 625 18.4193 0 18.2880 607.186 18.2880 0.711
18.3040 908 18.5420 0 18.3040 876.985 18.3040 1.028						18.3040 441 18.3963 0 18.3040 469.297 18.3040 -1.344						18.3040 584 18.4353 1 18.3040 604.755 18.3040 -0.857
18.3200 903 18.5580 0 18.3200 874.033 18.3200 0.963						18.3200 452 18.4123 0 18.3200 467.343 18.3200 -0.720						18.3200 593 18.4513 0 18.3200 602.335 18.3200 -0.383
18.3360 858 18.5740 0 18.3360 871.091 18.3360 -0.446						18.3360 463 18.4283 0 18.3360 465.398 18.3360 -0.111						18.3360 620 18.4673 0 18.3360 599.925 18.3360 0.805
18.3520 915 18.5900 1 18.3520 868.160 18.3520 1.547						18.3520 470 18.4443 0 18.3520 463.461 18.3520 0.301						18.3520 660 18.4833 0 18.3520 597.524 18.3520 2.428
18.3680 878 18.6060 0 18.3680 865.239 18.3680 0.430						18.3680 484 18.4603 0 18.3680 461.533 18.3680 1.019						18.3680 620 18.4993 0 18.3680 595.133 18.3680 0.997
18.3840 813 18.6220 0 18.3840 862.328 18.3840 -1.728						18.3840 441 18.4763 0 18.3840 459.614 18.3840 -0.884						18.3840 617 18.5153 0 18.3840 592.753 18.3840 0.975
18.4000 874 18.6380 0 18.4000 859.427 18.4000 0.492						18.4000 452 18.4923 0 18.4000 457.704 18.4000 -0.268						18.4000 593 18.5313 0 18.4000 590.381 18.4000 0.107
18.4160 882 18.6540 0 18.4160 856.537 18.4160 0.856						18.4160 477 18.5083 0 18.4160 455.802 18.4160 0.969						18.4160 602 18.5473 0 18.4160 588.020 18.4160 0.569
18.4320 870 18.6700 0 18.4320 853.657 18.4320 0.553						18.4320 476 18.5243 0 18.4320 453.908 18.4320 1.010						18.4320 582 18.5633 0 18.4320 585.669 18.4320 -0.152
18.4480 839 18.6860 0 18.4480 850.787 18.4480 -0.406						18.4480 443 18.5403 0 18.4480 452.023 18.4480 -0.428						18.4480 569 18.5793 0 18.4480 583.327 18.4480 -0.600
18.4640 856 18.7020 0 18.4640 847.928 18.4640 0.276						18.4640 473 18.5563 0 18.4640 450.147 18.4640 1.049						18.4640 581 18.5953 0 18.4640 580.994 18.4640 0.000
18.4800 828 18.7180 0 18.4800 845.078 18.4800 -0.593						18.4800 438 18.5723 0 18.4800 448.279 18.4800 -0.490						18.4800 568 18.6113 0 18.4800 578.671 18.4800 -0.447
18.4960 877 18.7340 0 18.4960 842.238 18.4960 1.172						18.4960 434 18.5883 0 18.4960 446.419 18.4960 -0.595						18.4960 555 18.6273 0 18.4960 576.358 18.4960 -0.905
18.5120 835 18.7500 0 18.5120 839.409 18.5120 -0.152						18.5120 449 18.6043 0 18.5120 444.568 18.5120 0.209						18.5120 591 18.6433 0 18.5120 574.054 18.5120 0.696
18.5280 880 18.7660 0 18.5280 836.589 18.5280 1.462						18.5280 502 18.6203 0 18.5280 442.725 18.5280 2.640						18.5280 540 18.6593 0 18.5280 571.760 18.5280 -1.364
18.5440 837 18.7820 0 18.5440 833.779 18.5440 0.111						18.5440 432 18.6363 0 18.5440 440.890 18.5440 -0.427						18.5440 555 18.6753 0 18.5440 569.475 18.5440 -0.613
18.5600 803 18.7980 0 18.5600 830.980 18.5600 -0.986						18.5600 430 18.6523 0 18.5600 439.064 18.5600 -0.436						18.5600 565 18.6913 0 18.5600 567.200 18.5600 -0.092
18.5760 810 18.8140 0 18.5760 828.190 18.5760 -0.638						18.5760 369 18.6683 0 18.5760 437.246 18.5760 -3.543						18.5760 581 18.7073 0 18.5760 564.933 18.5760 0.665
18.5920 861 18.8300 0 18.5920 825.410 18.5920 1.212						18.5920 418 18.6843 0 18.5920 435.435 18.5920 -0.851						18.5920 550 18.7233 0 18.5920 562.677 18.5920 -0.540
18.6080 838 18.8460 0 18.6080 822.639 18.6080 0.530						18.6080 417 18.7003 0 18.6080 433.634 18.6080 -0.813						18.6080 553 18.7393 0 18.6080 560.429 18.6080 -0.315
18.6240 799 18.8620 0 18.6240 819.879 18.6240 -0.738						18.6240 430 18.7163 0 18.6240 431.840 18.6240 -0.089						18.6240 511 18.7553 0 18.6240 558.191 18.6240 -2.083
18.6400 819 18.8780 0 18.6400 817.128 18.6400 0.065						18.6400 369 18.7323 0 18.6400 430.054 18.6400 -3.170						18.6400 553 18.7713 0 18.6400 555.962 18.6400 -0.126
18.6560 807 18.8940 0 18.6560 814.387 18.6560 -0.260						18.6560 422 18.7483 0 18.6560 428.276 18.6560 -0.305						18.6560 534 18.7873 0 18.6560 553.742 18.6560 -0.853
18.6720 852 18.9100 0 18.6720 811.656 18.6720 1.381						18.6720 443 18.7643 0 18.6720 426.506 18.6720 0.782						18.6720 539 18.8033 0 18.6720 551.531 18.6720 -0.539
18.6880 819 18.9260 0 18.6880 808.934 18.6880 0.351						18.6880 422 18.7803 0 18.6880 424.745 18.6880 -0.133						18.6880 552 18.8193 0 18.6880 549.329 18.6880 0.113
18.7040 803 18.9420 0 18.7040 806.222 18.7040 -0.114						18.7040 429 18.7963 0 18.7040 422.991 18.7040 0.289						18.7040 558 18.8353 0 18.7040 547.136 18.7040 0.459
18.7200 799 18.9580 0 18.7200 803.519 18.7200 -0.160						18.7200 474 18.8123 0 18.7200 421.245 18.7200 2.418						18.7200 572 18.8513 0 18.7200 544.952 18.7200 1.129
18.7360 863 18.9740 0 18.7360 800.826 18.7360 2.114						18.7360 402 18.8283 0 18.7360 419.506 18.7360 -0.871						18.7360 529 18.8673 0 18.7360 542.777 18.7360 -0.598
18.7520 843 18.9900 0 18.7520 798.143 18.7520 1.543						18.7520 394 18.8443 0 18.7520 417.776 18.7520 -1.195						18.7520 524 18.8833 0 18.7520 540.612 18.7520 -0.724
18.7680 824 19.0060 1 18.7680 795.469 18.7680 0.993						18.7680 402 18.8603 0 18.7680 416.053 18.7680 -0.699						18.7680 539 18.8993 0 18.7680 538.455 18.7680 0.023
18.7840 800 19.0220 0 18.7840 792.804 18.7840 0.254						18.7840 422 18.8763 0 18.7840 414.339 18.7840 0.372						18.7840 553 18.9153 0 18.7840 536.306 18.7840 0.709
18.8000 751 19.0380 0 18.8000 790.149 18.8000 -1.427						18.8000 415 18.8923 0 18.8000 412.631 18.8000 0.116						18.8000 543 18.9313 0 18.8000 534.167 18.8000 0.378
18.8160 812 19.0540 0 18.8160 787.503 18.8160 0.859						18.8160 396 18.9083 0 18.8160 410.932 18.8160 -0.748						18.8160 493 18.9473 0 18.8160 532.036 18.8160 -1.755
18.8320 735 19.0700 0 18.8320 784.866 18.8320 -1.837						18.8320 408 18.9243 0 18.8320 409.240 18.8320 -0.061						18.8320 554 18.9633 0 18.8320 529.915 18.8320 1.021
18.8480 753 19.0860 0 18.8480 782.239 18.8480 -1.064						18.8480 446 18.9403 0 18.8480 407.556 18.8480 1.816						18.8480 545 18.9793 0 18.8480 527.802 18.8480 0.735
18.8640 827 19.1020 0 18.8640 779.621 18.8640 1.646						18.8640 431 18.9563 0 18.8640 405.879 18.8640 1.207						18.8640 554 18.9953 0 18.8640 525.697 18.8640 1.200
18.8800 818 19.1180 1 18.8800 777.012 18.8800 1.431						18.8800 405 18.9723 0 18.8800 404.210 18.8800 0.039						18.8800 553 19.0113 0 18.8800 523.602 18.8800 1.248
18.8960 750 19.1340 0 18.8960 774.413 18.8960 -0.890						18.8960 406 18.9883 0 18.8960 402.548 18.8960 0.171						18.8960 570 19.0273 0 18.8960 521.514 18.8960 2.027
18.9120 792 19.1500 0 18.9120 771.822 18.9120 0.716						18.9120 417 19.0043 0 18.9120 400.894 18.9120 0.787						18.9120 518 19.0433 0 18.9120 519.436 18.9120 -0.063
18.9280 810 19.1660 0 18.9280 769.241 18.9280 1.430						18.9280 416 19.0203 0 18.9280 399.247 18.9280 0.819						18.9280 487 19.0593 0 18.9280 517.366 18.9280 -1.373
18.9440 794 19.1820 0 18.9440 766.669 18.9440 0.969						18.9440 380 19.0363 0 18.9440 397.608 18.9440 -0.901						18.9440 530 19.0753 0 18.9440 515.304 18.9440 0.637
18.9600 792 19.1980 1 18.9600 764.106 18.9600 0.990						18.9600 403 19.0523 0 18.9600 395.976 18.9600 0.349						18.9600 540 19.0913 0 18.9600 513.251 18.9600 1.149
18.9760 708 19.2140 0 18.9760 761.552 18.9760 -2.010						18.9760 403 19.0683 0 18.9760 394.351 18.9760 0.430						18.9760 515 19.1073 0 18.9760 511.206 18.9760 0.167
18.9920 759 19.2300 0 18.9920 759.006 18.9920 -0.000						18.9920 400 19.0843 0 18.9920 392.734 18.9920 0.362						18.9920 486 19.1233 0 18.9920 509.170 18.9920 -1.049
19.0080 740 19.2460 0 19.0080 756.470 19.0080 -0.605						19.0080 419 19.1003 0 19.0080 391.123 19.0080 1.359						19.0080 530 19.1393 0 19.0080 507.142 19.0080 0.991
19.0240 722 19.2620 0 19.0240 753.943 19.0240 -1.187						19.0240 411 19.1163 0 19.0240 389.521 19.0240 1.057						19.0240 532 19.1553 0 19.0240 505.123 19.0240 1.163
19.0400 753 19.2780 0 19.0400 751.425 19.0400 0.057						19.0400 399 19.1323 0 19.0400 387.925 19.0400 0.553						19.0400 511 19.1713 0 19.0400 503.111 19.0400 0.348
19.0560 741 19.2940 0 19.0560 748.916 19.0560 -0.290						19.0560 373 19.1483 0 19.0560 386.336 19.0560 -0.689						19.0560 463 19.1873 0 19.0560 501.108 19.0560 -1.767
19.0720 717 19.3100 0 19.0720 746.415 19.0720 -1.097						19.0720 400 19.1643 0 19.0720 384.755 19.0720 0.760						19.0720 531 19.2033 0 19.0720 499.114 19.0720 1.381
19.0880 774 19.3260 0 19.0880 743.923 19.0880 1.080						19.0880 388 19.1803 0 19.0880 383.181 19.0880 0.244						19.0880 489 19.2193 0 19.0880 497.127 19.0880 -0.367
19.1040 785 19.3420 0 19.1040 741.441 19.1040 1.553						19.1040 364 19.1963 0 19.1040 381.613 19.1040 -0.921						19.1040 538 19.2353 0 19.1040 495.149 19.1040 1.844
19.1200 716 19.3580 0 19.1200 738.966 19.1200 -0.857						19.1200 423 19.2123 0 19.1200 380.053 19.1200 2.083						19.1200 472 19.2513 0 19.1200 493.178 19.1200 -0.973
19.1360 765 19.3740 0 19.1360 736.501 19.1360 1.029						19.1360 414 19.2283 1 19.1360 378.500 19.1360 1.741						19.1360 471 19.2673 0 19.1360 491.216 19.1360 -0.930
19.1520 719 19.3900 0 19.1520 734.044 19.1520 -0.560						19.1520 371 19.2443 0 19.1520 376.954 19.1520 -0.308						19.1520 482 19.2833 0 19.1520 489.262 19.1520 -0.330
19.1680 750 19.4060 0 19.1680 731.596 19.1680 0.671						19.1680 423 19.2603 0 19.1680 375.415 19.1680 2.308						19.1680 489 19.2993 0 19.1680 487.316 19.1680 0.076
19.1840 726 19.4220 0 19.1840 729.157 19.1840 -0.117						19.1840 388 19.2763 0 19.1840 373.882 19.1840 0.715						19.1840 476 19.3153 0 19.1840 485.377 19.1840 -0.429
19.2000 728 19.4380 0 19.2000 726.726 19.2000 0.047						19.2000 378 19.2923 0 19.2000 372.357 19.2000 0.289						19.2000 444 19.3313 0 19.2000 483.447 19.2000 -1.868
19.2160 715 19.4540 1 19.2160 724.304 19.2160 -0.347						19.2160 373 19.3083 0 19.2160 370.838 19.2160 0.112						19.2160 517 19.3473 0 19.2160 481.525 19.2160 1.557
19.2320 727 19.4700 0 19.2320 721.890 19.2320 0.189						19.2320 358 19.3243 0 19.2320 369.326 19.2320 -0.597						19.2320 464 19.3633 0 19.2320 479.611 19.2320 -0.723
19.2480 736 19.4860 0 19.2480 719.485 19.2480 0.608						19.2480 372 19.3403 0 19.2480 367.821 19.2480 0.216						19.2480 486 19.3793 0 19.2480 477.704 19.2480 0.376
19.2640 753 19.5020 0 19.2640 717.088 19.2640 1.307						19.2640 360 19.3563 0 19.2640 366.323 19.2640 -0.332						19.2640 463 19.3953 0 19.2640 475.805 19.2640 -0.594
19.2800 753 19.5180 0 19.2800 714.700 19.2800 1.394						19.2800 352 19.3723 0 19.2800 364.832 19.2800 -0.682						19.2800 486 19.4113 0 19.2800 473.914 19.2800 0.547
19.2960 699 19.5340 0 19.2960 712.320 19.2960 -0.503						19.2960 360 19.3883 0 19.2960 363.347 19.2960 -0.176						19.2960 460 19.4273 0 19.2960 472.031 19.2960 -0.560
19.3120 713 19.5500 0 19.3120 709.949 19.3120 0.114						19.3120 354 19.4043 0 19.3120 361.869 19.3120 -0.417						19.3120 454 19.4433 0 19.3120 470.156 19.3120 -0.757
19.3280 689 19.5660 0 19.3280 707.586 19.3280 -0.707						19.3280 378 19.4203 1 19.3280 360.397 19.3280 0.903						19.3280 464 19.4593 0 19.3280 468.288 19.3280 -0.199
19.3440 715 19.5820 0 19.3440 705.231 19.3440 0.365						19.3440 389 19.4363 0 19.3440 358.932 19.3440 1.521						19.3440 440 19.4753 0 19.3440 466.428 19.3440 -1.257
19.3600 715 19.5980 0 19.3600 702.884 19.3600 0.452						19.3600 366 19.4523 0 19.3600 357.474 19.3600 0.444						19.3600 464 19.4913 0 19.3600 464.576 19.3600 -0.027
19.3760 654 19.6140 0 19.3760 700.546 19.3760 -1.817						19.3760 351 19.4683 0 19.3760 356.022 19.3760 -0.267						19.3760 499 19.5073 0 19.3760 462.731 19.3760 1.620
19.3920 715 19.6300 0 19.3920 698.216 19.3920 0.627						19.3920 350 19.4843 0 19.3920 354.577 19.3920 -0.244						19.3920 430 19.5233 0 19.3920 460.894 19.3920 -1.486
19.4080 719 19.6460 0 19.4080 695.895 19.4080 0.861						19.4080 400 19.5003 0 19.4080 353.138 19.4080 2.337						19.4080 450 19.5393 0 19.4080 459.064 19.4080 -0.426
19.4240 757 19.6620 0 19.4240 693.581 19.4240 2.302						19.4240 373 19.5163 0 19.4240 351.706 19.4240 1.100						19.4240 429 19.5553 0 19.4240 457.242 19.4240 -1.360
19.4400 720 19.6780 0 19.4400 691.276 19.4400 1.069						19.4400 362 19.5323 0 19.4400 350.280 19.4400 0.614						19.4400 408 19.5713 1 19.4400 455.427 19.4400 -2.342
19.4560 683 19.6940 1 19.4560 688.979 19.4560 -0.228						19.4560 364 19.5483 0 19.4560 348.861 19.4560 0.791						19.4560 454 19.5873 0 19.4560 453.620 19.4560 0.018
19.4720 652 19.7100 0 19.4720 686.689 19.4720 -1.356						19.4720 339 19.5643 0 19.4720 347.448 19.4720 -0.457						19.4720 413 19.6033 0 19.4720 451.820 19.4720 -1.906
19.4880 704 19.7260 0 19.4880 684.408 19.4880 0.737						19.4880 359 19.5803 0 19.4880 346.041 19.4880 0.682						19.4880 433 19.6193 0 19.4880 450.028 19.4880 -0.816
19.5040 717 19.7420 0 19.5040 682.135 19.5040 1.300						19.5040 337 19.5963 0 19.5040 344.641 19.5040 -0.415						19.5040 475 19.6353 0 19.5040 448.242 19.5040 1.225
19.5200 663 19.7580 0 19.5200 679.870 19.5200 -0.654						19.5200 329 19.6123 0 19.5200 343.246 19.5200 -0.783						19.5200 430 19.6513 0 19.5200 446.465 19.5200 -0.792
19.5360 699 19.7740 0 19.5360 677.613 19.5360 0.808						19.5360 334 19.6283 0 19.5360 341.859 19.5360 -0.429						19.5360 480 19.6673 0 19.5360 444.694 19.5360 1.608
19.5520 677 19.7900 0 19.5520 675.364 19.5520 0.063						19.5520 353 19.6443 0 19.5520 340.477 19.5520 0.665						19.5520 442 19.6833 0 19.5520 442.931 19.5520 -0.044
19.5680 736 19.8060 0 19.5680 673.123 19.5680 2.315						19.5680 379 19.6603 0 19.5680 339.102 19.5680 2.044						19.5680 440 19.6993 0 19.5680 441.175 19.5680 -0.056
19.5840 724 19.8220 0 19.5840 670.890 19.5840 1.971						19.5840 346 19.6763 0 19.5840 337.732 19.5840 0.443						19.5840 431 19.7153 0 19.5840 439.426 19.5840 -0.405
19.6000 665 19.8380 0 19.6000 668.665 19.6000 -0.142						19.6000 332 19.6923 0 19.6000 336.369 19.6000 -0.239						19.6000 409 19.7313 0 19.6000 437.685 19.6000 -1.415
19.6160 688 19.8540 0 19.6160 666.447 19.6160 0.820						19.6160 341 19.7083 0 19.6160 335.012 19.6160 0.323						19.6160 440 19.7473 0 19.6160 435.951 19.6160 0.193
19.6320 628 19.8700 0 19.6320 664.238 19.6320 -1.444						19.6320 318 19.7243 0 19.6320 333.661 19.6320 -0.875						19.6320 444 19.7633 0 19.6320 434.223 19.6320 0.463
19.6480 690 19.8860 1 19.6480 662.036 19.6480 1.063						19.6480 342 19.7403 0 19.6480 332.317 19.6480 0.522						19.6480 408 19.7793 0 19.6480 432.503 19.6480 -1.210
19.6640 643 19.9020 0 19.6640 659.842 19.6640 -0.663						19.6640 327 19.7563 0 19.6640 330.978 19.6640 -0.219						19.6640 457 19.7953 0 19.6640 430.790 19.6640 1.223
19.6800 660 19.9180 0 19.6800 657.655 19.6800 0.091						19.6800 305 19.7723 0 19.6800 329.645 19.6800 -1.407						19.6800 468 19.8113 0 19.6800 429.084 19.6800 1.795
19.6960 639 19.9340 0 19.6960 655.477 19.6960 -0.651						19.6960 328 19.7883 0 19.6960 328.318 19.6960 -0.018						19.6960 447 19.8273 0 19.6960 427.385 19.6960 0.926
19.7120 655 19.9500 0 19.7120 653.306 19.7120 0.066						19.7120 342 19.8043 0 19.7120 326.998 19.7120 0.809						19.7120 442 19.8433 0 19.7120 425.693 19.7120 0.774
19.7280 690 19.9660 0 19.7280 651.142 19.7280 1.477						19.7280 348 19.8203 0 19.7280 325.683 19.7280 1.193						19.7280 391 19.8593 0 19.7280 424.007 19.7280 -1.665
19.7440 661 19.9820 0 19.7440 648.987 19.7440 0.467						19.7440 375 19.8363 0 19.7440 324.374 19.7440 2.607						19.7440 430 19.8753 0 19.7440 422.329 19.7440 0.369
19.7600 691 19.9980 0 19.7600 646.839 19.7600 1.678						19.7600 350 19.8523 0 19.7600 323.071 19.7600 1.435						19.7600 406 19.8913 0 19.7600 420.658 19.7600 -0.726
19.7760 634 20.0140 0 19.7760 644.698 19.7760 -0.424						19.7760 334 19.8683 0 19.7760 321.773 19.7760 0.667						19.7760 405 19.9073 0 19.7760 418.993 19.7760 -0.694
19.7920 673 20.0300 0 19.7920 642.565 19.7920 1.171						19.7920 318 19.8843 0 19.7920 320.482 19.7920 -0.139						19.7920 447 19.9233 0 19.7920 417.336 19.7920 1.400
19.8080 625 20.0460 0 19.8080 640.440 19.8080 -0.617						19.8080 332 19.9003 0 19.8080 319.196 19.8080 0.701						19.8080 455 19.9393 0 19.8080 415.685 19.8080 1.839
19.8240 648 20.0620 0 19.8240 638.322 19.8240 0.380						19.8240 354 19.9163 0 19.8240 317.917 19.8240 1.912						19.8240 408 19.9553 0 19.8240 414.041 19.8240 -0.298
19.8400 605 20.0780 0 19.8400 636.211 19.8400 -1.267						19.8400 312 19.9323 0 19.8400 316.643 19.8400 -0.262						19.8400 401 19.9713 0 19.8400 412.403 19.8400 -0.568
19.8560 660 20.0940 0 19.8560 634.108 19.8560 1.006						19.8560 340 19.9483 0 19.8560 315.374 19.8560 1.332						19.8560 424 19.9873 1 19.8560 410.773 19.8560 0.641
19.8720 603 20.1100 0 19.8720 632.013 19.8720 -1.180						19.8720 344 19.9643 0 19.8720 314.112 19.8720 1.607						19.8720 423 20.0033 0 19.8720 409.149 19.8720 0.672
19.8880 627 20.1260 0 19.8880 629.925 19.8880 -0.117						19.8880 300 19.9803 0 19.8880 312.855 19.8880 -0.740						19.8880 403 20.0193 0 19.8880 407.532 19.8880 -0.225
19.9040 594 20.1420 0 19.9040 627.844 19.9040 -1.386						19.9040 293 19.9963 0 19.9040 311.603 19.9040 -1.083						19.9040 436 20.0353 0 19.9040 405.921 19.9040 1.437
19.9200 629 20.1580 0 19.9200 625.770 19.9200 0.129						19.9200 324 20.0123 0 19.9200 310.357 19.9200 0.756						19.9200 408 20.0513 0 19.9200 404.317 19.9200 0.182
19.9360 612 20.1740 0 19.9360 623.704 19.9360 -0.472						19.9360 320 20.0283 0 19.9360 309.117 19.9360 0.606						19.9360 395 20.0673 0 19.9360 402.720 19.9360 -0.387
19.9520 635 20.1900 0 19.9520 621.645 19.9520 0.529						19.9520 308 20.0443 0 19.9520 307.883 19.9520 0.007						19.9520 396 20.0833 0 19.9520 401.129 19.9520 -0.257
19.9680 620 20.2060 0 19.9680 619.593 19.9680 0.016						19.9680 308 20.0603 0 19.9680 306.654 19.9680 0.076						19.9680 362 20.0993 0 19.9680 399.545 19.9680 -1.968
19.9840 679 20.2220 0 19.9840 617.549 19.9840 2.355						19.9840 304 20.0763 0 19.9840 305.430 19.9840 -0.082						19.9840 401 20.1153 0 19.9840 397.967 19.9840 0.151
20.0000 633 20.2380 0 20.0000 615.512 20.0000 0.694						20.0000 313 20.0923 0 20.0000 304.212 20.0000 0.495						20.0000 411 20.1313 0 20.0000 396.395 20.0000 0.719
20.0160 631 20.2540 0 20.0160 613.482 20.0160 0.696						20.0160 313 20.1083 0 20.0160 303.000 20.0160 0.563						20.0160 428 20.1473 0 20.0160 394.831 20.0160 1.600
20.0320 618 20.2700 0 20.0320 611.459 20.0320 0.263						20.0320 268 20.1243 0 20.0320 301.793 20.0320 -2.057						20.0320 384 20.1633 0 20.0320 393.272 20.0320 -0.472
20.0480 670 20.2860 0 20.0480 609.443 20.0480 2.336						20.0480 327 20.1403 0 20.0480 300.591 20.0480 1.456						20.0480 391 20.1793 0 20.0480 391.720 20.0480 -0.036
20.0640 583 20.3020 0 20.0640 607.435 20.0640 -1.010						20.0640 324 20.1563 0 20.0640 299.395 20.0640 1.363						20.0640 387 20.1953 0 20.0640 390.174 20.0640 -0.161
20.0800 650 20.3180 0 20.0800 605.433 20.0800 1.745						20.0800 317 20.1723 0 20.0800 298.204 20.0800 1.052						20.0800 382 20.2113 0 20.0800 388.635 20.0800 -0.339
20.0960 617 20.3340 1 20.0960 603.438 20.0960 0.545						20.0960 305 20.1883 0 20.0960 297.018 20.0960 0.456						20.0960 401 20.2273 0 20.0960 387.102 20.0960 0.692
20.1120 620 20.3500 0 20.1120 601.451 20.1120 0.744						20.1120 280 20.2043 0 20.1120 295.838 20.1120 -0.943						20.1120 378 20.2433 0 20.1120 385.575 20.1120 -0.389
20.1280 588 20.3660 0 20.1280 599.471 20.1280 -0.472						20.1280 273 20.2203 0 20.1280 294.663 20.1280 -1.306						20.1280 348 20.2593 0 20.1280 384.055 20.1280 -1.927
20.1440 572 20.3820 1 20.1440 597.497 20.1440 -1.064						20.1440 324 20.2363 0 20.1440 293.494 20.1440 1.690						20.1440 372 20.2753 0 20.1440 382.541 20.1440 -0.545
20.1600 598 20.3980 0 20.1600 595.531 20.1600 0.101						20.1600 306 20.2523 0 20.1600 292.329 20.1600 0.779						20.1600 402 20.2913 0 20.1600 381.033 20.1600 1.043
20.1760 618 20.4140 1 20.1760 593.571 20.1760 0.981						20.1760 288 20.2683 0 20.1760 291.170 20.1760 -0.186						20.1760 393 20.3073 0 20.1760 379.531 20.1760 0.678
20.1920 615 20.4300 0 20.1920 591.618 20.1920 0.941						20.1920 290 20.2843 0 20.1920 290.016 20.1920 -0.001						20.1920 403 20.3233 0 20.1920 378.035 20.1920 1.240
20.2080 613 20.4460 0 20.2080 589.673 20.2080 0.941						20.2080 284 20.3003 0 20.2080 288.867 20.2080 -0.288						20.2080 353 20.3393 0 20.2080 376.546 20.2080 -1.250
20.2240 593 20.4620 0 20.2240 587.734 20.2240 0.216						20.2240 320 20.3163 0 20.2240 287.724 20.2240 1.799						20.2240 392 20.3553 0 20.2240 375.062 20.2240 0.853
20.2400 640 20.4780 0 20.2400 585.802 20.2400 2.139						20.2400 277 20.3323 1 20.2400 286.585 20.2400 -0.574						20.2400 392 20.3713 0 20.2400 373.585 20.2400 0.928
20.2560 562 20.4940 0 20.2560 583.877 20.2560 -0.921						20.2560 333 20.3483 0 20.2560 285.452 20.2560 2.598						20.2560 365 20.3873 0 20.2560 372.114 20.2560 -0.371
20.2720 575 20.5100 0 20.2720 581.958 20.2720 -0.290						20.2720 303 20.3643 0 20.2720 284.324 20.2720 1.069						20.2720 351 20.4033 0 20.2720 370.649 20.2720 -1.046
20.2880 577 20.5260 0 20.2880 580.046 20.2880 -0.127						20.2880 296 20.3803 0 20.2880 283.201 20.2880 0.741						20.2880 370 20.4193 0 20.2880 369.189 20.2880 0.042
20.3040 566 20.5420 0 20.3040 578.141 20.3040 -0.509						20.3040 293 20.3963 0 20.3040 282.083 20.3040 0.636						20.3040 360 20.4353 0 20.3040 367.736 20.3040 -0.407
20.3200 581 20.5580 0 20.3200 576.243 20.3200 0.197						20.3200 260 20.4123 0 20.3200 280.969 20.3200 -1.296						20.3200 347 20.4513 0 20.3200 366.289 20.3200 -1.032
20.3360 592 20.5740 0 20.3360 574.352 20.3360 0.724						20.3360 277 20.4283 0 20.3360 279.861 20.3360 -0.171						20.3360 360 20.4673 0 20.3360 364.848 20.3360 -0.255
20.3520 614 20.5900 0 20.3520 572.467 20.3520 1.673						20.3520 287 20.4443 1 20.3520 278.758 20.3520 0.485						20.3520 309 20.4833 0 20.3520 363.412 20.3520 -3.085
20.3680 596 20.6060 0 20.3680 570.589 20.3680 1.039						20.3680 259 20.4603 0 20.3680 277.660 20.3680 -1.155						20.3680 370 20.4993 0 20.3680 361.983 20.3680 0.416
20.3840 545 20.6220 0 20.3840 568.717 20.3840 -1.014						20.3840 276 20.4763 0 20.3840 276.567 20.3840 -0.034						20.3840 346 20.5153 0 20.3840 360.559 20.3840 -0.780
20.4000 569 20.6380 0 20.4000 566.852 20.4000 0.090						20.4000 267 20.4923 0 20.4000 275.478 20.4000 -0.517						20.4000 372 20.5313 0 20.4000 359.142 20.4000 0.665
20.4160 575 20.6540 0 20.4160 564.994 20.4160 0.417						20.4160 297 20.5083 0 20.4160 274.395 20.4160 1.307						20.4160 366 20.5473 0 20.4160 357.730 20.4160 0.431
20.4320 586 20.6700 0 20.4320 563.142 20.4320 0.943						20.4320 273 20.5243 0 20.4320 273.316 20.4320 -0.019						20.4320 357 20.5633 0 20.4320 356.324 20.4320 0.036
20.4480 559 20.6860 0 20.4480 561.296 20.4480 -0.097						20.4480 290 20.5403 0 20.4480 272.243 20.4480 1.039						20.4480 366 20.5793 0 20.4480 354.923 20.4480 0.577
20.4640 583 20.7020 0 20.4640 559.458 20.4640 0.973						20.4640 265 20.5563 0 20.4640 271.174 20.4640 -0.378						20.4640 381 20.5953 0 20.4640 353.529 20.4640 1.404
20.4800 565 20.7180 0 20.4800 557.625 20.4800 0.310						20.4800 296 20.5723 1 20.4800 270.110 20.4800 1.500						20.4800 348 20.6113 0 20.4800 352.140 20.4800 -0.221
20.4960 562 20.7340 1 20.4960 555.799 20.4960 0.261						20.4960 237 20.5883 0 20.4960 269.050 20.4960 -2.073						20.4960 329 20.6273 0 20.4960 350.757 20.4960 -1.196
20.5120 548 20.7500 0 20.5120 553.980 20.5120 -0.255						20.5120 289 20.6043 0 20.5120 267.996 20.5120 1.231						20.5120 366 20.6433 0 20.5120 349.379 20.5120 0.866
20.5280 539 20.7660 0 20.5280 552.167 20.5280 -0.566						20.5280 268 20.6203 0 20.5280 266.946 20.5280 0.064						20.5280 368 20.6593 0 20.5280 348.007 20.5280 1.039
20.5440 556 20.7820 0 20.5440 550.360 20.5440 0.239						20.5440 273 20.6363 0 20.5440 265.901 20.5440 0.428						20.5440 394 20.6753 0 20.5440 346.641 20.5440 2.380
20.5600 613 20.7980 0 20.5600 548.560 20.5600 2.598						20.5600 286 20.6523 0 20.5600 264.860 20.5600 1.246						20.5600 322 20.6913 0 20.5600 345.280 20.5600 -1.293
20.5760 550 20.8140 1 20.5760 546.766 20.5760 0.138						20.5760 258 20.6683 0 20.5760 263.824 20.5760 -0.361						20.5760 354 20.7073 0 20.5760 343.925 20.5760 0.534
20.5920 576 20.8300 0 20.5920 544.978 20.5920 1.290						20.5920 286 20.6843 0 20.5920 262.793 20.5920 1.367						20.5920 331 20.7233 0 20.5920 342.576 20.5920 -0.634
20.6080 548 20.8460 0 20.6080 543.197 20.6080 0.205						20.6080 290 20.7003 0 20.6080 261.767 20.6080 1.652						20.6080 345 20.7393 0 20.6080 341.232 20.6080 0.202
20.6240 565 20.8620 0 20.6240 541.422 20.6240 0.990						20.6240 280 20.7163 0 20.6240 260.745 20.6240 1.147						20.6240 374 20.7553 0 20.6240 339.894 20.6240 1.759
20.6400 558 20.8780 0 20.6400 539.653 20.6400 0.775						20.6400 258 20.7323 0 20.6400 259.728 20.6400 -0.107						20.6400 352 20.7713 0 20.6400 338.561 20.6400 0.714
20.6560 529 20.8940 0 20.6560 537.891 20.6560 -0.386						20.6560 282 20.7483 0 20.6560 258.715 20.6560 1.382						20.6560 352 20.7873 0 20.6560 337.233 20.6560 0.785
20.6720 534 20.9100 0 20.6720 536.135 20.6720 -0.092						20.6720 261 20.7643 0 20.6720 257.707 20.6720 0.203						20.6720 332 20.8033 1 20.6720 335.911 20.6720 -0.214
20.6880 538 20.9260 0 20.6880 534.385 20.6880 0.156						20.6880 260 20.7803 0 20.6880 256.703 20.6880 0.204						20.6880 328 20.8193 0 20.6880 334.595 20.6880 -0.363
20.7040 552 20.9420 0 20.7040 532.641 20.7040 0.823						20.7040 261 20.7963 0 20.7040 255.704 20.7040 0.327						20.7040 353 20.8353 0 20.7040 333.284 20.7040 1.046
20.7200 516 20.9580 0 20.7200 530.903 20.7200 -0.655						20.7200 241 20.8123 0 20.7200 254.709 20.7200 -0.879						20.7200 329 20.8513 0 20.7200 331.978 20.7200 -0.164
20.7360 543 20.9740 0 20.7360 529.171 20.7360 0.592						20.7360 253 20.8283 0 20.7360 253.719 20.7360 -0.045						20.7360 318 20.8673 0 20.7360 330.678 20.7360 -0.709
20.7520 513 20.9900 0 20.7520 527.446 20.7520 -0.637						20.7520 240 20.8443 0 20.7520 252.734 20.7520 -0.819						20.7520 311 20.8833 0 20.7520 329.383 20.7520 -1.039
20.7680 517 21.0060 1 20.7680 525.726 20.7680 -0.383						20.7680 248 20.8603 0 20.7680 251.752 20.7680 -0.237						20.7680 325 20.8993 0 20.7680 328.093 20.7680 -0.171
20.7840 546 21.0220 0 20.7840 524.013 20.7840 0.939						20.7840 212 20.8763 0 20.7840 250.775 20.7840 -2.651						20.7840 320 20.9153 0 20.7840 326.808 20.7840 -0.379
20.8000 496 21.0380 0 20.8000 522.305 20.8000 -1.179						20.8000 274 20.8923 0 20.8000 249.803 20.8000 1.457						20.8000 349 20.9313 0 20.8000 325.529 20.8000 1.253
20.8160 518 21.0540 0 20.8160 520.604 20.8160 -0.114						20.8160 270 20.9083 0 20.8160 248.835 20.8160 1.283						20.8160 329 20.9473 0 20.8160 324.255 20.8160 0.261
20.8320 492 21.0700 0 20.8320 518.909 20.8320 -1.211						20.8320 253 20.9243 0 20.8320 247.871 20.8320 0.321						20.8320 303 20.9633 1 20.8320 322.987 20.8320 -1.144
20.8480 545 21.0860 0 20.8480 517.220 20.8480 1.188						20.8480 250 20.9403 0 20.8480 246.912 20.8480 0.195						20.8480 313 20.9793 0 20.8480 321.723 20.8480 -0.491
20.8640 534 21.1020 0 20.8640 515.536 20.8640 0.798						20.8640 208 20.9563 0 20.8640 245.956 20.8640 -2.619						20.8640 326 20.9953 0 20.8640 320.465 20.8640 0.306
20.8800 506 21.1180 0 20.8800 513.859 20.8800 -0.349						20.8800 236 20.9723 0 20.8800 245.006 20.8800 -0.584						20.8800 331 21.0113 0 20.8800 319.212 20.8800 0.646
20.8960 499 21.1340 0 20.8960 512.187 20.8960 -0.589						20.8960 275 20.9883 0 20.8960 244.059 20.8960 1.859						20.8960 301 21.0273 0 20.8960 317.964 20.8960 -0.975
20.9120 498 21.1500 0 20.9120 510.521 20.9120 -0.560						20.9120 251 21.0043 0 20.9120 243.117 20.9120 0.496						20.9120 311 21.0433 0 20.9120 316.721 20.9120 -0.323
20.9280 535 21.1660 0 20.9280 508.862 20.9280 1.128						20.9280 262 21.0203 0 20.9280 242.179 20.9280 1.220						20.9280 353 21.0593 0 20.9280 315.483 20.9280 1.991
20.9440 538 21.1820 0 20.9440 507.208 20.9440 1.325						20.9440 235 21.0363 0 20.9440 241.245 20.9440 -0.406						20.9440 331 21.0753 0 20.9440 314.250 20.9440 0.918
20.9600 492 21.1980 0 20.9600 505.560 20.9600 -0.610						20.9600 244 21.0523 0 20.9600 240.315 20.9600 0.235						20.9600 304 21.0913 0 20.9600 313.023 20.9600 -0.516
20.9760 482 21.2140 0 20.9760 503.917 20.9760 -0.996						20.9760 229 21.0683 0 20.9760 239.390 20.9760 -0.684						20.9760 330 21.1073 0 20.9760 311.800 20.9760 0.999
20.9920 499 21.2300 0 20.9920 502.281 20.9920 -0.147						20.9920 241 21.0843 0 20.9920 238.468 20.9920 0.162						20.9920 317 21.1233 0 20.9920 310.583 20.9920 0.359
21.0080 492 21.2460 0 21.0080 500.650 21.0080 -0.389						21.0080 204 21.1003 0 21.0080 237.551 21.0080 -2.338						21.0080 277 21.1393 0 21.0080 309.370 21.0080 -1.938
21.0240 506 21.2620 0 21.0240 499.025 21.0240 0.309						21.0240 235 21.1163 0 21.0240 236.638 21.0240 -0.106						21.0240 313 21.1553 1 21.0240 308.163 21.0240 0.273
21.0400 541 21.2780 0 21.0400 497.406 21.0400 1.871						21.0400 220 21.1323 0 21.0400 235.729 21.0400 -1.056						21.0400 341 21.1713 0 21.0400 306.960 21.0400 1.838
21.0560 514 21.2940 0 21.0560 495.793 21.0560 0.802						21.0560 230 21.1483 0 21.0560 234.824 21.0560 -0.317						21.0560 313 21.1873 0 21.0560 305.762 21.0560 0.408
21.0720 508 21.3100 0 21.0720 494.185 21.0720 0.612						21.0720 248 21.1643 1 21.0720 233.923 21.0720 0.890						21.0720 310 21.2033 0 21.0720 304.570 21.0720 0.307
21.0880 527 21.3260 0 21.0880 492.583 21.0880 1.496						21.0880 243 21.1803 0 21.0880 233.026 21.0880 0.637						21.0880 310 21.2193 0 21.0880 303.382 21.0880 0.375
21.1040 510 21.3420 0 21.1040 490.986 21.1040 0.840						21.1040 247 21.1963 0 21.1040 232.134 21.1040 0.942						21.1040 310 21.2353 0 21.1040 302.199 21.1040 0.442
21.1200 489 21.3580 0 21.1200 489.395 21.1200 -0.018						21.1200 236 21.2123 0 21.1200 231.245 21.1200 0.308						21.1200 294 21.2513 0 21.1200 301.021 21.1200 -0.408
21.1360 481 21.3740 0 21.1360 487.810 21.1360 -0.310						21.1360 241 21.2283 0 21.1360 230.360 21.1360 0.683						21.1360 323 21.2673 0 21.1360 299.847 21.1360 1.284
21.1520 511 21.3900 0 21.1520 486.230 21.1520 1.094						21.1520 232 21.2443 0 21.1520 229.479 21.1520 0.165						21.1520 314 21.2833 0 21.1520 298.679 21.1520 0.862
21.1680 480 21.4060 0 21.1680 484.656 21.1680 -0.212						21.1680 232 21.2603 0 21.1680 228.602 21.1680 0.222						21.1680 297 21.2993 0 21.1680 297.515 21.1680 -0.030
21.1840 468 21.4220 0 21.1840 483.088 21.1840 -0.696						21.1840 221 21.2763 0 21.1840 227.730 21.1840 -0.451						21.1840 301 21.3153 0 21.1840 296.356 21.1840 0.267
21.2000 465 21.4380 0 21.2000 481.525 21.2000 -0.765						21.2000 225 21.2923 0 21.2000 226.861 21.2000 -0.123						21.2000 317 21.3313 0 21.2000 295.202 21.2000 1.220
21.2160 512 21.4540 0 21.2160 479.967 21.2160 1.413						21.2160 242 21.3083 0 21.2160 225.995 21.2160 1.025						21.2160 309 21.3473 0 21.2160 294.053 21.2160 0.848
21.2320 505 21.4700 0 21.2320 478.415 21.2320 1.181						21.2320 243 21.3243 0 21.2320 225.134 21.2320 1.141						21.2320 295 21.3633 0 21.2320 292.908 21.2320 0.121
21.2480 522 21.4860 1 21.2480 476.869 21.2480 1.972						21.2480 212 21.3403 0 21.2480 224.277 21.2480 -0.839						21.2480 323 21.3793 0 21.2480 291.768 21.2480 1.732
21.2640 495 21.5020 0 21.2640 475.328 21.2640 0.882						21.2640 218 21.3563 0 21.2640 223.423 21.2640 -0.366						21.2640 297 21.3953 0 21.2640 290.633 21.2640 0.368
21.2800 506 21.5180 0 21.2800 473.792 21.2800 1.429						21.2800 242 21.3723 0 21.2800 222.574 21.2800 1.244						21.2800 292 21.4113 0 21.2800 289.502 21.2800 0.146
21.2960 474 21.5340 0 21.2960 472.262 21.2960 0.080						21.2960 236 21.3883 0 21.2960 221.728 21.2960 0.925						21.2960 302 21.4273 0 21.2960 288.376 21.2960 0.781
21.3120 470 21.5500 0 21.3120 470.737 21.3120 -0.034						21.3120 233 21.4043 0 21.3120 220.886 21.3120 0.790						21.3120 282 21.4433 0 21.3120 287.255 21.3120 -0.312
21.3280 464 21.5660 0 21.3280 469.217 21.3280 -0.242						21.3280 238 21.4203 1 21.3280 220.048 21.3280 1.159						21.3280 297 21.4593 0 21.3280 286.138 21.3280 0.628
21.3440 469 21.5820 0 21.3440 467.703 21.3440 0.060						21.3440 229 21.4363 0 21.3440 219.213 21.3440 0.644						21.3440 330 21.4753 0 21.3440 285.026 21.3440 2.468
21.3600 490 21.5980 0 21.3600 466.194 21.3600 1.073						21.3600 193 21.4523 0 21.3600 218.383 21.3600 -1.818						21.3600 284 21.4913 0 21.3600 283.918 21.3600 0.005
21.3760 475 21.6140 1 21.3760 464.691 21.3760 0.472						21.3760 189 21.4683 0 21.3760 217.556 21.3760 -2.066						21.3760 282 21.5073 0 21.3760 282.815 21.3760 -0.048
21.3920 493 21.6300 0 21.3920 463.193 21.3920 1.340						21.3920 214 21.4843 0 21.3920 216.732 21.3920 -0.186						21.3920 298 21.5233 0 21.3920 281.717 21.3920 0.940
21.4080 481 21.6460 0 21.4080 461.700 21.4080 0.878						21.4080 196 21.5003 0 21.4080 215.913 21.4080 -1.415						21.4080 311 21.5393 0 21.4080 280.622 21.4080 1.717
21.4240 475 21.6620 0 21.4240 460.212 21.4240 0.677						21.4240 229 21.5163 0 21.4240 215.097 21.4240 0.915						21.4240 292 21.5553 0 21.4240 279.533 21.4240 0.727
21.4400 495 21.6780 0 21.4400 458.730 21.4400 1.627						21.4400 223 21.5323 0 21.4400 214.285 21.4400 0.581						21.4400 298 21.5713 0 21.4400 278.448 21.4400 1.129
21.4560 459 21.6940 0 21.4560 457.253 21.4560 0.081						21.4560 222 21.5483 0 21.4560 213.476 21.4560 0.570						21.4560 277 21.5873 0 21.4560 277.367 21.4560 -0.022
21.4720 422 21.7100 0 21.4720 455.781 21.4720 -1.641						21.4720 215 21.5643 1 21.4720 212.671 21.4720 0.158						21.4720 280 21.6033 0 21.4720 276.291 21.4720 0.221
21.4880 461 21.7260 0 21.4880 454.314 21.4880 0.311						21.4880 207 21.5803 0 21.4880 211.870 21.4880 -0.337						21.4880 285 21.6193 0 21.4880 275.219 21.4880 0.577
21.5040 448 21.7420 0 21.5040 452.853 21.5040 -0.229						21.5040 241 21.5963 0 21.5040 211.072 21.5040 1.920						21.5040 285 21.6353 0 21.5040 274.152 21.5040 0.640
21.5200 461 21.7580 0 21.5200 451.396 21.5200 0.446						21.5200 225 21.6123 0 21.5200 210.278 21.5200 0.977						21.5200 291 21.6513 0 21.5200 273.089 21.5200 1.046
21.5360 431 21.7740 0 21.5360 449.945 21.5360 -0.910						21.5360 212 21.6283 0 21.5360 209.487 21.5360 0.172						21.5360 280 21.6673 0 21.5360 272.030 21.5360 0.475
21.5520 462 21.7900 0 21.5520 448.499 21.5520 0.627						21.5520 221 21.6443 0 21.5520 208.700 21.5520 0.824						21.5520 270 21.6833 0 21.5520 270.976 21.5520 -0.059
21.5680 421 21.8060 0 21.5680 447.058 21.5680 -1.267						21.5680 240 21.6603 0 21.5680 207.917 21.5680 2.062						21.5680 271 21.6993 0 21.5680 269.926 21.5680 0.065
21.5840 483 21.8220 0 21.5840 445.622 21.5840 1.697						21.5840 217 21.6763 0 21.5840 207.137 21.5840 0.666						21.5840 247 21.7153 0 21.5840 268.881 21.5840 -1.387
21.6000 409 21.8380 0 21.6000 444.191 21.6000 -1.736						21.6000 244 21.6923 0 21.6000 206.360 21.6000 2.400						21.6000 300 21.7313 0 21.6000 267.839 21.6000 1.851
21.6160 458 21.8540 0 21.6160 442.765 21.6160 0.710						21.6160 203 21.7083 0 21.6160 205.587 21.6160 -0.181						21.6160 296 21.7473 0 21.6160 266.802 21.6160 1.691
21.6320 409 21.8700 0 21.6320 441.345 21.6320 -1.595						21.6320 194 21.7243 0 21.6320 204.818 21.6320 -0.773						21.6320 269 21.7633 0 21.6320 265.769 21.6320 0.196
21.6480 450 21.8860 0 21.6480 439.929 21.6480 0.474						21.6480 179 21.7403 0 21.6480 204.052 21.6480 -1.862						21.6480 266 21.7793 0 21.6480 264.741 21.6480 0.077
21.6640 446 21.9020 0 21.6640 438.518 21.6640 0.353						21.6640 213 21.7563 0 21.6640 203.289 21.6640 0.662						21.6640 273 21.7953 0 21.6640 263.716 21.6640 0.560
21.6800 457 21.9180 0 21.6800 437.112 21.6800 0.928						21.6800 197 21.7723 0 21.6800 202.530 21.6800 -0.392						21.6800 239 21.8113 0 21.6800 262.696 21.6800 -1.526
21.6960 430 21.9340 0 21.6960 435.711 21.6960 -0.275						21.6960 190 21.7883 0 21.6960 201.774 21.6960 -0.850						21.6960 238 21.8273 0 21.6960 261.680 21.6960 -1.529
21.7120 453 21.9500 0 21.7120 434.315 21.7120 0.876						21.7120 223 21.8043 0 21.7120 201.022 21.7120 1.465						21.7120 261 21.8433 0 21.7120 260.669 21.7120 0.020
21.7280 423 21.9660 0 21.7280 432.924 21.7280 -0.481						21.7280 229 21.8203 0 21.7280 200.273 21.7280 1.890						21.7280 292 21.8593 0 21.7280 259.661 21.7280 1.886
21.7440 416 21.9820 0 21.7440 431.538 21.7440 -0.760						21.7440 197 21.8363 1 21.7440 199.527 21.7440 -0.179						21.7440 247 21.8753 0 21.7440 258.658 21.7440 -0.739
21.7600 456 21.9980 0 21.7600 430.157 21.7600 1.208						21.7600 219 21.8523 0 21.7600 198.785 21.7600 1.360						21.7600 275 21.8913 0 21.7600 257.658 21.7600 1.042
21.7760 433 22.0140 0 21.7760 428.781 21.7760 0.202						21.7760 203 21.8683 0 21.7760 198.046 21.7760 0.346						21.7760 263 21.9073 0 21.7760 256.663 21.7760 0.389
21.7920 458 22.0300 0 21.7920 427.409 21.7920 1.426						21.7920 183 21.8843 0 21.7920 197.310 21.7920 -1.052						21.7920 258 21.9233 0 21.7920 255.672 21.7920 0.144
21.8080 407 22.0460 0 21.8080 426.042 21.8080 -0.942						21.8080 200 21.9003 0 21.8080 196.578 21.8080 0.241						21.8080 274 21.9393 0 21.8080 254.685 21.8080 1.163
21.8240 389 22.0620 0 21.8240 424.681 21.8240 -1.804						21.8240 183 21.9163 0 21.8240 195.849 21.8240 -0.945						21.8240 256 21.9553 0 21.8240 253.702 21.8240 0.143
21.8400 414 22.0780 0 21.8400 423.324 21.8400 -0.457						21.8400 197 21.9323 0 21.8400 195.123 21.8400 0.133						21.8400 259 21.9713 0 21.8400 252.723 21.8400 0.389
21.8560 426 22.0940 0 21.8560 421.971 21.8560 0.195						21.8560 212 21.9483 0 21.8560 194.400 21.8560 1.203						21.8560 231 21.9873 0 21.8560 251.748 21.8560 -1.359
21.8720 459 22.1100 0 21.8720 420.624 21.8720 1.787						21.8720 210 21.9643 0 21.8720 193.681 21.8720 1.121						21.8720 270 22.0033 0 21.8720 250.777 21.8720 1.166
21.8880 403 22.1260 1 21.8880 419.281 21.8880 -0.809						21.8880 186 21.9803 0 21.8880 192.965 21.8880 -0.508						21.8880 258 22.0193 0 21.8880 249.810 21.8880 0.508
21.9040 402 22.1420 0 21.9040 417.943 21.9040 -0.793						21.9040 179 21.9963 0 21.9040 192.252 21.9040 -0.985						21.9040 248 22.0353 0 21.9040 248.847 21.9040 -0.054
21.9200 405 22.1580 0 21.9200 416.610 21.9200 -0.575						21.9200 210 22.0123 0 21.9200 191.543 21.9200 1.268						21.9200 248 22.0513 0 21.9200 247.888 21.9200 0.007
21.9360 381 22.1740 0 21.9360 415.281 21.9360 -1.752						21.9360 191 22.0283 0 21.9360 190.836 21.9360 0.012						21.9360 241 22.0673 0 21.9360 246.932 21.9360 -0.381
21.9520 402 22.1900 0 21.9520 413.957 21.9520 -0.595						21.9520 189 22.0443 0 21.9520 190.133 21.9520 -0.082						21.9520 261 22.0833 0 21.9520 245.981 21.9520 0.926
21.9680 426 22.2060 0 21.9680 412.638 21.9680 0.646						21.9680 197 22.0603 0 21.9680 189.433 21.9680 0.536						21.9680 269 22.0993 0 21.9680 245.034 21.9680 1.456
21.9840 400 22.2220 0 21.9840 411.324 21.9840 -0.565						21.9840 197 22.0763 0 21.9840 188.736 21.9840 0.586						21.9840 257 22.1153 0 21.9840 244.090 21.9840 0.802
22.0000 421 22.2380 0 22.0000 410.014 22.0000 0.534						22.0000 196 22.0923 0 22.0000 188.042 22.0000 0.566						22.0000 260 22.1313 0 22.0000 243.151 22.0000 1.041
22.0160 393 22.2540 0 22.0160 408.708 22.0160 -0.790						22.0160 171 22.1083 0 22.0160 187.351 22.0160 -1.243						22.0160 250 22.1473 0 22.0160 242.215 22.0160 0.490
22.0320 421 22.2700 0 22.0320 407.408 22.0320 0.661						22.0320 208 22.1243 0 22.0320 186.664 22.0320 1.472						22.0320 230 22.1633 0 22.0320 241.283 22.0320 -0.741
22.0480 387 22.2860 0 22.0480 406.112 22.0480 -0.969						22.0480 184 22.1403 0 22.0480 185.979 22.0480 -0.145						22.0480 273 22.1793 0 22.0480 240.355 22.0480 1.969
22.0640 407 22.3020 0 22.0640 404.820 22.0640 0.108						22.0640 191 22.1563 0 22.0640 185.298 22.0640 0.410						22.0640 251 22.1953 0 22.0640 239.431 22.0640 0.727
22.0800 443 22.3180 0 22.0800 403.533 22.0800 1.871						22.0800 192 22.1723 0 22.0800 184.619 22.0800 0.530						22.0800 215 22.2113 0 22.0800 238.511 22.0800 -1.596
22.0960 398 22.3340 0 22.0960 402.251 22.0960 -0.213						22.0960 183 22.1883 0 22.0960 183.944 22.0960 -0.069						22.0960 227 22.2273 0 22.0960 237.594 22.0960 -0.700
22.1120 391 22.3500 0 22.1120 400.973 22.1120 -0.503						22.1120 196 22.2043 0 22.1120 183.272 22.1120 0.905						22.1120 236 22.2433 0 22.1120 236.681 22.1120 -0.044
22.1280 404 22.3660 0 22.1280 399.699 22.1280 0.213						22.1280 189 22.2203 0 22.1280 182.602 22.1280 0.463						22.1280 240 22.2593 1 22.1280 235.772 22.1280 0.272
22.1440 426 22.3820 0 22.1440 398.430 22.1440 1.333						22.1440 186 22.2363 0 22.1440 181.936 22.1440 0.296						22.1440 233 22.2753 0 22.1440 234.867 22.1440 -0.122
22.1600 420 22.3980 0 22.1600 397.166 22.1600 1.112						22.1600 195 22.2523 0 22.1600 181.273 22.1600 0.978						22.1600 227 22.2913 0 22.1600 233.965 22.1600 -0.460
22.1760 397 22.4140 0 22.1760 395.906 22.1760 0.055						22.1760 178 22.2683 0 22.1760 180.613 22.1760 -0.195						22.1760 223 22.3073 0 22.1760 233.067 22.1760 -0.671
22.1920 451 22.4300 1 22.1920 394.650 22.1920 2.648						22.1920 204 22.2843 0 22.1920 179.955 22.1920 1.675						22.1920 230 22.3233 0 22.1920 232.173 22.1920 -0.143
22.2080 397 22.4460 0 22.2080 393.399 22.2080 0.180						22.2080 171 22.3003 0 22.2080 179.301 22.2080 -0.631						22.2080 231 22.3393 0 22.2080 231.282 22.2080 -0.018
22.2240 375 22.4620 0 22.2240 392.152 22.2240 -0.883						22.2240 170 22.3163 0 22.2240 178.649 22.2240 -0.660						22.2240 226 22.3553 0 22.2240 230.395 22.2240 -0.291
22.2400 399 22.4780 1 22.2400 390.910 22.2400 0.404						22.2400 177 22.3323 0 22.2400 178.001 22.2400 -0.075						22.2400 237 22.3713 0 22.2400 229.512 22.2400 0.484
22.2560 383 22.4940 0 22.2560 389.672 22.2560 -0.340						22.2560 149 22.3483 0 22.2560 177.355 22.2560 -2.308						22.2560 234 22.3873 0 22.2560 228.632 22.2560 0.349
22.2720 395 22.5100 0 22.2720 388.439 22.2720 0.329						22.2720 190 22.3643 0 22.2720 176.712 22.2720 0.959						22.2720 224 22.4033 1 22.2720 227.756 22.2720 -0.250
22.2880 390 22.5260 0 22.2880 387.209 22.2880 0.141						22.2880 165 22.3803 0 22.2880 176.073 22.2880 -0.857						22.2880 212 22.4193 0 22.2880 226.884 22.2880 -1.017
22.3040 375 22.5420 0 22.3040 385.984 22.3040 -0.566						22.3040 192 22.3963 0 22.3040 175.436 22.3040 1.189						22.3040 244 22.4353 0 22.3040 226.015 22.3040 1.147
22.3200 388 22.5580 0 22.3200 384.764 22.3200 0.164						22.3200 187 22.4123 0 22.3200 174.802 22.3200 0.887						22.3200 227 22.4513 0 22.3200 225.149 22.3200 0.122
22.3360 383 22.5740 0 22.3360 383.548 22.3360 -0.028						22.3360 174 22.4283 0 22.3360 174.170 22.3360 -0.013						22.3360 224 22.4673 0 22.3360 224.288 22.3360 -0.019
22.3520 389 22.5900 0 22.3520 382.336 22.3520 0.337						22.3520 161 22.4443 0 22.3520 173.542 22.3520 -0.982						22.3520 228 22.4833 0 22.3520 223.429 22.3520 0.301
22.3680 379 22.6060 0 22.3680 381.128 22.3680 -0.109						22.3680 161 22.4603 0 22.3680 172.916 22.3680 -0.933						22.3680 206 22.4993 0 22.3680 222.575 22.3680 -1.149
22.3840 408 22.6220 0 22.3840 379.925 22.3840 1.387						22.3840 189 22.4763 0 22.3840 172.294 22.3840 1.209						22.3840 230 22.5153 0 22.3840 221.723 22.3840 0.543
22.4000 419 22.6380 0 22.4000 378.725 22.4000 1.963						22.4000 171 22.4923 0 22.4000 171.674 22.4000 -0.051						22.4000 205 22.5313 0 22.4000 220.876 22.4000 -1.103
22.4160 376 22.6540 0 22.4160 377.530 22.4160 -0.079						22.4160 180 22.5083 0 22.4160 171.056 22.4160 0.663						22.4160 208 22.5473 0 22.4160 220.031 22.4160 -0.830
22.4320 363 22.6700 0 22.4320 376.340 22.4320 -0.698						22.4320 157 22.5243 0 22.4320 170.442 22.4320 -1.066						22.4320 224 22.5633 0 22.4320 219.191 22.4320 0.320
22.4480 326 22.6860 0 22.4480 375.153 22.4480 -2.714						22.4480 162 22.5403 0 22.4480 169.830 22.4480 -0.611						22.4480 241 22.5793 0 22.4480 218.353 22.4480 1.453
22.4640 406 22.7020 0 22.4640 373.971 22.4640 1.586						22.4640 168 22.5563 0 22.4640 169.221 22.4640 -0.094						22.4640 211 22.5953 0 22.4640 217.519 22.4640 -0.447
22.4800 331 22.7180 0 22.4800 372.792 22.4800 -2.290						22.4800 189 22.5723 0 22.4800 168.615 22.4800 1.475						22.4800 219 22.6113 0 22.4800 216.689 22.4800 0.155
22.4960 400 22.7340 0 22.4960 371.618 22.4960 1.416						22.4960 157 22.5883 0 22.4960 168.012 22.4960 -0.873						22.4960 215 22.6273 0 22.4960 215.862 22.4960 -0.059
22.5120 388 22.7500 0 22.5120 370.449 22.5120 0.889						22.5120 177 22.6043 0 22.5120 167.411 22.5120 0.717						22.5120 215 22.6433 0 22.5120 215.038 22.5120 -0.003
22.5280 370 22.7660 0 22.5280 369.283 22.5280 0.037						22.5280 175 22.6203 0 22.5280 166.813 22.5280 0.615						22.5280 213 22.6593 0 22.5280 214.218 22.5280 -0.083
22.5440 353 22.7820 0 22.5440 368.121 22.5440 -0.803						22.5440 177 22.6363 0 22.5440 166.218 22.5440 0.806						22.5440 176 22.6753 0 22.5440 213.401 22.5440 -2.803
22.5600 373 22.7980 0 22.5600 366.964 22.5600 0.312						22.5600 169 22.6523 0 22.5600 165.625 22.5600 0.258						22.5600 223 22.6913 0 22.5600 212.588 22.5600 0.694
22.5760 390 22.8140 0 22.5760 365.810 22.5760 1.222						22.5760 161 22.6683 0 22.5760 165.035 22.5760 -0.316						22.5760 196 22.7073 0 22.5760 211.777 22.5760 -1.121
22.5920 332 22.8300 0 22.5920 364.661 22.5920 -1.787						22.5920 172 22.6843 0 22.5920 164.448 22.5920 0.573						22.5920 191 22.7233 0 22.5920 210.970 22.5920 -1.438
22.6080 346 22.8460 0 22.6080 363.515 22.6080 -0.939						22.6080 156 22.7003 0 22.6080 163.863 22.6080 -0.626						22.6080 195 22.7393 0 22.6080 210.167 22.6080 -1.081
22.6240 358 22.8620 0 22.6240 362.374 22.6240 -0.231						22.6240 154 22.7163 0 22.6240 163.281 22.6240 -0.743						22.6240 175 22.7553 0 22.6240 209.367 22.6240 -2.583
22.6400 358 22.8780 0 22.6400 361.237 22.6400 -0.171						22.6400 163 22.7323 0 22.6400 162.701 22.6400 0.023						22.6400 209 22.7713 0 22.6400 208.570 22.6400 0.030
22.6560 335 22.8940 0 22.6560 360.103 22.6560 -1.367						22.6560 158 22.7483 0 22.6560 162.124 22.6560 -0.326						22.6560 214 22.7873 0 22.6560 207.776 22.6560 0.423
22.6720 346 22.9100 0 22.6720 358.974 22.6720 -0.695						22.6720 190 22.7643 0 22.6720 161.550 22.6720 2.053						22.6720 223 22.8033 0 22.6720 206.985 22.6720 1.068
22.6880 380 22.9260 0 22.6880 357.849 22.6880 1.133						22.6880 162 22.7803 0 22.6880 160.978 22.6880 0.080						22.6880 220 22.8193 0 22.6880 206.198 22.6880 0.926
22.7040 374 22.9420 0 22.7040 356.727 22.7040 0.891						22.7040 160 22.7963 0 22.7040 160.409 22.7040 -0.032						22.7040 223 22.8353 0 22.7040 205.414 22.7040 1.172
22.7200 366 22.9580 0 22.7200 355.610 22.7200 0.542						22.7200 173 22.8123 0 22.7200 159.843 22.7200 0.995						22.7200 221 22.8513 1 22.7200 204.634 22.7200 1.096
22.7360 369 22.9740 0 22.7360 354.497 22.7360 0.753						22.7360 173 22.8283 0 22.7360 159.279 22.7360 1.037						22.7360 215 22.8673 0 22.7360 203.856 22.7360 0.757
22.7520 380 22.9900 0 22.7520 353.387 22.7520 1.362						22.7520 180 22.8443 0 22.7520 158.717 22.7520 1.578						22.7520 196 22.8833 0 22.7520 203.082 22.7520 -0.503
22.7680 354 23.0060 0 22.7680 352.281 22.7680 0.091						22.7680 153 22.8603 0 22.7680 158.158 22.7680 -0.414						22.7680 213 22.8993 0 22.7680 202.310 22.7680 0.729
22.7840 356 23.0220 0 22.7840 351.180 22.7840 0.255						22.7840 168 22.8763 0 22.7840 157.602 22.7840 0.798						22.7840 218 22.9153 0 22.7840 201.542 22.7840 1.110
22.8000 350 23.0380 0 22.8000 350.082 22.8000 -0.004						22.8000 156 22.8923 0 22.8000 157.048 22.8000 -0.083						22.8000 189 22.9313 0 22.8000 200.778 22.8000 -0.852
22.8160 358 23.0540 0 22.8160 348.988 22.8160 0.475						22.8160 149 22.9083 0 22.8160 156.496 22.8160 -0.610						22.8160 206 22.9473 0 22.8160 200.016 22.8160 0.415
22.8320 362 23.0700 0 22.8320 347.898 22.8320 0.739						22.8320 171 22.9243 0 22.8320 155.947 22.8320 1.144						22.8320 199 22.9633 0 22.8320 199.257 22.8320 -0.018
22.8480 357 23.0860 0 22.8480 346.812 22.8480 0.538						22.8480 160 22.9403 0 22.8480 155.401 22.8480 0.361						22.8480 214 22.9793 0 22.8480 198.502 22.8480 1.055
22.8640 368 23.1020 0 22.8640 345.729 22.8640 1.158						22.8640 154 22.9563 0 22.8640 154.857 22.8640 -0.069						22.8640 186 22.9953 0 22.8640 197.749 22.8640 -0.857
22.8800 322 23.1180 0 22.8800 344.651 22.8800 -1.258						22.8800 164 22.9723 0 22.8800 154.315 22.8800 0.752						22.8800 211 23.0113 0 22.8800 197.000 22.8800 0.959
22.8960 377 23.1340 0 22.8960 343.576 22.8960 1.717						22.8960 157 22.9883 0 22.8960 153.776 22.8960 0.256						22.8960 194 23.0273 0 22.8960 196.254 22.8960 -0.161
22.9120 361 23.1500 0 22.9120 342.505 22.9120 0.971						22.9120 180 23.0043 0 22.9120 153.239 22.9120 1.984						22.9120 176 23.0433 0 22.9120 195.511 22.9120 -1.462
22.9280 388 23.1660 0 22.9280 341.437 22.9280 2.358						22.9280 152 23.0203 0 22.9280 152.704 22.9280 -0.057						22.9280 205 23.0593 0 22.9280 194.771 22.9280 0.711
22.9440 331 23.1820 0 22.9440 340.374 22.9440 -0.514						22.9440 157 23.0363 0 22.9440 152.172 22.9440 0.383						22.9440 202 23.0753 0 22.9440 194.034 22.9440 0.558
22.9600 325 23.1980 0 22.9600 339.314 22.9600 -0.792						22.9600 139 23.0523 0 22.9600 151.643 22.9600 -1.065						22.9600 200 23.0913 0 22.9600 193.300 22.9600 0.471
22.9760 365 23.2140 0 22.9760 338.258 22.9760 1.396						22.9760 144 23.0683 0 22.9760 151.116 22.9760 -0.589						22.9760 203 23.1073 0 22.9760 192.569 22.9760 0.729
22.9920 329 23.2300 0 22.9920 337.206 22.9920 -0.451						22.9920 147 23.0843 0 22.9920 150.591 22.9920 -0.294						22.9920 197 23.1233 0 22.9920 191.841 22.9920 0.366
23.0080 353 23.2460 0 23.0080 336.158 23.0080 0.894						23.0080 150 23.1003 0 23.0080 150.068 23.0080 -0.006						23.0080 190 23.1393 0 23.0080 191.116 23.0080 -0.081
23.0240 342 23.2620 1 23.0240 335.113 23.0240 0.371						23.0240 154 23.1163 0 23.0240 149.548 23.0240 0.356						23.0240 184 23.1553 0 23.0240 190.393 23.0240 -0.469
23.0400 352 23.2780 0 23.0400 334.071 23.0400 0.953						23.0400 143 23.1323 0 23.0400 149.030 23.0400 -0.501						23.0400 182 23.1713 0 23.0400 189.674 23.0400 -0.566
23.0560 345 23.2940 0 23.0560 333.034 23.0560 0.642						23.0560 142 23.1483 0 23.0560 148.515 23.0560 -0.543						23.0560 172 23.1873 0 23.0560 188.958 23.0560 -1.286
23.0720 331 23.3100 0 23.0720 332.000 23.0720 -0.055						23.0720 140 23.1643 0 23.0720 148.002 23.0720 -0.672						23.0720 175 23.2033 0 23.0720 188.245 23.0720 -0.996
23.0880 374 23.3260 0 23.0880 330.970 23.0880 2.219						23.0880 142 23.1803 0 23.0880 147.491 23.0880 -0.458						23.0880 175 23.2193 0 23.0880 187.535 23.0880 -0.942
23.1040 343 23.3420 0 23.1040 329.943 23.1040 0.703						23.1040 152 23.1963 0 23.1040 146.982 23.1040 0.404						23.1040 181 23.2353 0 23.1040 186.827 23.1040 -0.431
23.1200 352 23.3580 0 23.1200 328.921 23.1200 1.227						23.1200 165 23.2123 1 23.1200 146.476 23.1200 1.433						23.1200 191 23.2513 0 23.1200 186.123 23.1200 0.351
23.1360 315 23.3740 1 23.1360 327.901 23.1360 -0.725						23.1360 132 23.2283 0 23.1360 145.972 23.1360 -1.207						23.1360 212 23.2673 1 23.1360 185.421 23.1360 1.817
23.1520 330 23.3900 0 23.1520 326.885 23.1520 0.171						23.1520 149 23.2443 0 23.1520 145.470 23.1520 0.287						23.1520 179 23.2833 0 23.1520 184.723 23.1520 -0.425
23.1680 353 23.4060 0 23.1680 325.873 23.1680 1.440						23.1680 156 23.2603 0 23.1680 144.971 23.1680 0.877						23.1680 177 23.2993 0 23.1680 184.027 23.1680 -0.525
23.1840 344 23.4220 0 23.1840 324.865 23.1840 1.029						23.1840 160 23.2763 0 23.1840 144.474 23.1840 1.220						23.1840 169 23.3153 0 23.1840 183.334 23.1840 -1.096
23.2000 345 23.4380 0 23.2000 323.860 23.2000 1.135						23.2000 135 23.2923 0 23.2000 143.979 23.2000 -0.767						23.2000 185 23.3313 0 23.2000 182.644 23.2000 0.172
23.2160 341 23.4540 1 23.2160 322.858 23.2160 0.980						23.2160 126 23.3083 0 23.2160 143.486 23.2160 -1.545						23.2160 182 23.3473 0 23.2160 181.957 23.2160 0.003
23.2320 327 23.4700 0 23.2320 321.860 23.2320 0.283						23.2320 142 23.3243 0 23.2320 142.995 23.2320 -0.083						23.2320 189 23.3633 0 23.2320 181.272 23.2320 0.559
23.2480 362 23.4860 0 23.2480 320.866 23.2480 2.156						23.2480 120 23.3403 0 23.2480 142.507 23.2480 -2.038						23.2480 176 23.3793 0 23.2480 180.591 23.2480 -0.344
23.2640 314 23.5020 0 23.2640 319.875 23.2640 -0.331						23.2640 158 23.3563 0 23.2640 142.021 23.2640 1.263						23.2640 184 23.3953 0 23.2640 179.912 23.2640 0.300
23.2800 332 23.5180 0 23.2800 318.888 23.2800 0.717						23.2800 127 23.3723 0 23.2800 141.537 23.2800 -1.280						23.2800 187 23.4113 0 23.2800 179.236 23.2800 0.565
23.2960 296 23.5340 0 23.2960 317.904 23.2960 -1.269						23.2960 122 23.3883 0 23.2960 141.055 23.2960 -1.711						23.2960 191 23.4273 0 23.2960 178.562 23.2960 0.895
23.3120 345 23.5500 1 23.3120 316.923 23.3120 1.507						23.3120 149 23.4043 0 23.3120 140.575 23.3120 0.686						23.3120 163 23.4433 0 23.3120 177.892 23.3120 -1.159
23.3280 327 23.5660 0 23.3280 315.946 23.3280 0.609						23.3280 135 23.4203 0 23.3280 140.098 23.3280 -0.436						23.3280 171 23.4593 0 23.3280 177.224 23.3280 -0.473
23.3440 320 23.5820 0 23.3440 314.973 23.3440 0.280						23.3440 140 23.4363 0 23.3440 139.622 23.3440 0.032						23.3440 185 23.4753 0 23.3440 176.559 23.3440 0.617
23.3600 317 23.5980 1 23.3600 314.002 23.3600 0.168						23.3600 134 23.4523 0 23.3600 139.149 23.3600 -0.442						23.3600 171 23.4913 0 23.3600 175.897 23.3600 -0.372
23.3760 332 23.6140 0 23.3760 313.036 23.3760 1.038						23.3760 138 23.4683 0 23.3760 138.678 23.3760 -0.057						23.3760 186 23.5073 0 23.3760 175.237 23.3760 0.785
23.3920 315 23.6300 0 23.3920 312.072 23.3920 0.164						23.3920 142 23.4843 1 23.3920 138.209 23.3920 0.316						23.3920 179 23.5233 0 23.3920 174.580 23.3920 0.328
23.4080 332 23.6460 0 23.4080 311.112 23.4080 1.143						23.4080 139 23.5003 0 23.4080 137.742 23.4080 0.106						23.4080 182 23.5393 1 23.4080 173.926 23.4080 0.595
23.4240 335 23.6620 0 23.4240 310.156 23.4240 1.353						23.4240 139 23.5163 0 23.4240 137.277 23.4240 0.145						23.4240 159 23.5553 0 23.4240 173.275 23.4240 -1.125
23.4400 325 23.6780 0 23.4400 309.203 23.4400 0.874						23.4400 124 23.5323 0 23.4400 136.815 23.4400 -1.142						23.4400 159 23.5713 0 23.4400 172.626 23.4400 -1.074
23.4560 320 23.6940 0 23.4560 308.253 23.4560 0.655						23.4560 130 23.5483 0 23.4560 136.354 23.4560 -0.553						23.4560 180 23.5873 0 23.4560 171.980 23.4560 0.594
23.4720 340 23.7100 0 23.4720 307.307 23.4720 1.768						23.4720 145 23.5643 0 23.4720 135.895 23.4720 0.751						23.4720 167 23.6033 0 23.4720 171.336 23.4720 -0.334
23.4880 315 23.7260 0 23.4880 306.363 23.4880 0.485						23.4880 134 23.5803 0 23.4880 135.439 23.4880 -0.123						23.4880 190 23.6193 0 23.4880 170.696 23.4880 1.393
23.5040 295 23.7420 0 23.5040 305.424 23.5040 -0.605						23.5040 137 23.5963 0 23.5040 134.985 23.5040 0.171						23.5040 154 23.6353 0 23.5040 170.057 23.5040 -1.286
23.5200 318 23.7580 0 23.5200 304.487 23.5200 0.755						23.5200 117 23.6123 0 23.5200 134.532 23.5200 -1.607						23.5200 165 23.6513 0 23.5200 169.422 23.5200 -0.342
23.5360 322 23.7740 0 23.5360 303.554 23.5360 1.025						23.5360 112 23.6283 0 23.5360 134.082 23.5360 -2.068						23.5360 185 23.6673 0 23.5360 168.789 23.5360 1.185
23.5520 305 23.7900 1 23.5520 302.624 23.5520 0.136						23.5520 130 23.6443 0 23.5520 133.633 23.5520 -0.316						23.5520 187 23.6833 0 23.5520 168.158 23.5520 1.370
23.5680 334 23.8060 0 23.5680 301.698 23.5680 1.762						23.5680 122 23.6603 0 23.5680 133.187 23.5680 -1.005						23.5680 155 23.6993 0 23.5680 167.531 23.5680 -1.000
23.5840 331 23.8220 0 23.5840 300.774 23.5840 1.656						23.5840 117 23.6763 0 23.5840 132.743 23.5840 -1.443						23.5840 187 23.7153 0 23.5840 166.905 23.5840 1.462
23.6000 309 23.8380 0 23.6000 299.854 23.6000 0.519						23.6000 157 23.6923 0 23.6000 132.301 23.6000 1.959						23.6000 160 23.7313 0 23.6000 166.283 23.6000 -0.494
23.6160 318 23.8540 0 23.6160 298.937 23.6160 1.066						23.6160 121 23.7083 0 23.6160 131.860 23.6160 -0.979						23.6160 161 23.7473 0 23.6160 165.663 23.6160 -0.365
23.6320 298 23.8700 1 23.6320 298.024 23.6320 -0.001						23.6320 135 23.7243 0 23.6320 131.422 23.6320 0.306						23.6320 164 23.7633 0 23.6320 165.045 23.6320 -0.081
23.6480 314 23.8860 0 23.6480 297.113 23.6480 0.950						23.6480 129 23.7403 0 23.6480 130.985 23.6480 -0.173						23.6480 161 23.7793 0 23.6480 164.430 23.6480 -0.269
23.6640 271 23.9020 0 23.6640 296.206 23.6640 -1.526						23.6640 125 23.7563 0 23.6640 130.551 23.6640 -0.493						23.6640 159 23.7953 0 23.6640 163.818 23.6640 -0.380
23.6800 285 23.9180 0 23.6800 295.302 23.6800 -0.608						23.6800 131 23.7723 0 23.6800 130.119 23.6800 0.076						23.6800 195 23.8113 0 23.6800 163.208 23.6800 2.265
23.6960 303 23.9340 0 23.6960 294.402 23.6960 0.492						23.6960 125 23.7883 0 23.6960 129.688 23.6960 -0.416						23.6960 158 23.8273 0 23.6960 162.600 23.6960 -0.364
23.7120 281 23.9500 0 23.7120 293.504 23.7120 -0.743						23.7120 142 23.8043 1 23.7120 129.259 23.7120 1.062						23.7120 182 23.8433 0 23.7120 161.995 23.7120 1.475
23.7280 291 23.9660 0 23.7280 292.610 23.7280 -0.094						23.7280 108 23.8203 0 23.7280 128.833 23.7280 -1.986						23.7280 165 23.8593 0 23.7280 161.393 23.7280 0.279
23.7440 330 23.9820 0 23.7440 291.718 23.7440 2.101						23.7440 122 23.8363 1 23.7440 128.408 23.7440 -0.575						23.7440 157 23.8753 0 23.7440 160.793 23.7440 -0.301
23.7600 307 23.9980 0 23.7600 290.830 23.7600 0.920						23.7600 123 23.8523 0 23.7600 127.985 23.7600 -0.446						23.7600 176 23.8913 0 23.7600 160.195 23.7600 1.185
23.7760 294 24.0140 0 23.7760 289.945 23.7760 0.236						23.7760 133 23.8683 0 23.7760 127.564 23.7760 0.468						23.7760 168 23.9073 0 23.7760 159.600 23.7760 0.644
23.7920 299 24.0300 0 23.7920 289.063 23.7920 0.573						23.7920 114 23.8843 0 23.7920 127.145 23.7920 -1.221						23.7920 145 23.9233 0 23.7920 159.007 23.7920 -1.155
23.8080 263 24.0460 0 23.8080 288.185 23.8080 -1.547						23.8080 143 23.9003 0 23.8080 126.728 23.8080 1.351						23.8080 151 23.9393 0 23.8080 158.417 23.8080 -0.600
23.8240 289 24.0620 0 23.8240 287.309 23.8240 0.099						23.8240 133 23.9163 0 23.8240 126.313 23.8240 0.576						23.8240 168 23.9553 0 23.8240 157.829 23.8240 0.780
23.8400 308 24.0780 0 23.8400 286.436 23.8400 1.225						23.8400 129 23.9323 0 23.8400 125.899 23.8400 0.271						23.8400 174 23.9713 0 23.8400 157.244 23.8400 1.263
23.8560 277 24.0940 0 23.8560 285.567 23.8560 -0.513						23.8560 117 23.9483 0 23.8560 125.488 23.8560 -0.778						23.8560 139 23.9873 0 23.8560 156.661 23.8560 -1.487
23.8720 277 24.1100 0 23.8720 284.700 23.8720 -0.461						23.8720 128 23.9643 0 23.8720 125.078 23.8720 0.256						23.8720 155 24.0033 0 23.8720 156.080 23.8720 -0.086
23.8880 285 24.1260 0 23.8880 283.837 23.8880 0.069						23.8880 141 23.9803 0 23.8880 124.670 23.8880 1.366						23.8880 134 24.0193 0 23.8880 155.502 23.8880 -1.844
23.9040 278 24.1420 0 23.9040 282.977 23.9040 -0.297						23.9040 140 23.9963 0 23.9040 124.264 23.9040 1.321						23.9040 158 24.0353 0 23.9040 154.926 23.9040 0.243
23.9200 243 24.1580 0 23.9200 282.119 23.9200 -2.499						23.9200 122 24.0123 0 23.9200 123.860 23.9200 -0.167						23.9200 177 24.0513 0 23.9200 154.353 23.9200 1.693
23.9360 356 24.1740 0 23.9360 281.265 23.9360 3.950						23.9360 114 24.0283 0 23.9360 123.457 23.9360 -0.878						23.9360 131 24.0673 0 23.9360 153.782 23.9360 -1.975
23.9520 294 24.1900 0 23.9520 280.414 23.9520 0.790						23.9520 118 24.0443 0 23.9520 123.057 23.9520 -0.462						23.9520 167 24.0833 0 23.9520 153.213 23.9520 1.061
23.9680 290 24.2060 0 23.9680 279.566 23.9680 0.611						23.9680 124 24.0603 0 23.9680 122.658 23.9680 0.120						23.9680 180 24.0993 0 23.9680 152.647 23.9680 2.028
23.9840 301 24.2220 0 23.9840 278.720 23.9840 1.280						23.9840 115 24.0763 0 23.9840 122.261 23.9840 -0.671						23.9840 170 24.1153 0 23.9840 152.083 23.9840 1.366
24.0000 262 24.2380 0 24.0000 277.878 24.0000 -0.977						24.0000 114 24.0923 0 24.0000 121.866 24.0000 -0.730						24.0000 174 24.1313 0 24.0000 151.521 24.0000 1.695
24.0160 281 24.2540 0 24.0160 277.039 24.0160 0.235						24.0160 121 24.1083 0 24.0160 121.472 24.0160 -0.043						24.0160 185 24.1473 0 24.0160 150.961 24.0160 2.489
24.0320 285 24.2700 0 24.0320 276.202 24.0320 0.519						24.0320 159 24.1243 0 24.0320 121.080 24.0320 2.988						24.0320 136 24.1633 0 24.0320 150.404 24.0320 -1.226
24.0480 261 24.2860 0 24.0480 275.369 24.0480 -0.886						24.0480 117 24.1403 0 24.0480 120.690 24.0480 -0.338						24.0480 149 24.1793 0 24.0480 149.849 24.0480 -0.069
24.0640 272 24.3020 0 24.0640 274.538 24.0640 -0.153						24.0640 110 24.1563 0 24.0640 120.302 24.0640 -0.973						24.0640 137 24.1953 0 24.0640 149.297 24.0640 -1.043
24.0800 233 24.3180 0 24.0800 273.711 24.0800 -2.656						24.0800 114 24.1723 0 24.0800 119.916 24.0800 -0.549						24.0800 145 24.2113 0 24.0800 148.746 24.0800 -0.309
24.0960 325 24.3340 1 24.0960 272.886 24.0960 2.882						24.0960 115 24.1883 0 24.0960 119.531 24.0960 -0.419						24.0960 144 24.2273 0 24.0960 148.198 24.0960 -0.347
24.1120 280 24.3500 0 24.1120 272.065 24.1120 0.473						24.1120 104 24.2043 0 24.1120 119.148 24.1120 -1.471						24.1120 132 24.2433 0 24.1120 147.652 24.1120 -1.352
24.1280 261 24.3660 0 24.1280 271.246 24.1280 -0.632						24.1280 99 24.2203 0 24.1280 118.767 24.1280 -1.967						24.1280 121 24.2593 0 24.1280 147.109 24.1280 -2.354
24.1440 237 24.3820 1 24.1440 270.430 24.1440 -2.162						24.1440 115 24.2363 0 24.1440 118.387 24.1440 -0.313						24.1440 134 24.2753 0 24.1440 146.567 24.1440 -1.078
24.1600 285 24.3980 0 24.1600 269.617 24.1600 0.908						24.1600 125 24.2523 0 24.1600 118.010 24.1600 0.620						24.1600 130 24.2913 0 24.1600 146.028 24.1600 -1.395
24.1760 305 24.4140 0 24.1760 268.807 24.1760 2.066						24.1760 117 24.2683 1 24.1760 117.633 24.1760 -0.058						24.1760 144 24.3073 0 24.1760 145.491 24.1760 -0.123
24.1920 291 24.4300 0 24.1920 267.999 24.1920 1.344						24.1920 128 24.2843 1 24.1920 117.259 24.1920 0.942						24.1920 160 24.3233 0 24.1920 144.957 24.1920 1.182
24.2080 281 24.4460 0 24.2080 267.195 24.2080 0.821						24.2080 127 24.3003 0 24.2080 116.886 24.2080 0.890						24.2080 129 24.3393 0 24.2080 144.424 24.2080 -1.348
24.2240 279 24.4620 0 24.2240 266.393 24.2240 0.752						24.2240 115 24.3163 0 24.2240 116.515 24.2240 -0.140						24.2240 135 24.3553 1 24.2240 143.894 24.2240 -0.760
24.2400 267 24.4780 0 24.2400 265.594 24.2400 0.086						24.2400 106 24.3323 0 24.2400 116.146 24.2400 -0.976						24.2400 172 24.3713 0 24.2400 143.365 24.2400 2.171
24.2560 246 24.4940 0 24.2560 264.798 24.2560 -1.194						24.2560 114 24.3483 0 24.2560 115.778 24.2560 -0.165						24.2560 148 24.3873 0 24.2560 142.839 24.2560 0.421
24.2720 266 24.5100 0 24.2720 264.005 24.2720 0.122						24.2720 84 24.3643 0 24.2720 115.412 24.2720 -3.387						24.2720 151 24.4033 1 24.2720 142.316 24.2720 0.702
24.2880 295 24.5260 0 24.2880 263.215 24.2880 1.844						24.2880 124 24.3803 0 24.2880 115.047 24.2880 0.798						24.2880 143 24.4193 0 24.2880 141.794 24.2880 0.100
24.3040 273 24.5420 1 24.3040 262.427 24.3040 0.638						24.3040 108 24.3963 0 24.3040 114.684 24.3040 -0.637						24.3040 110 24.4353 0 24.3040 141.274 24.3040 -2.955
24.3200 295 24.5580 0 24.3200 261.642 24.3200 1.936						24.3200 106 24.4123 0 24.3200 114.323 24.3200 -0.801						24.3200 130 24.4513 0 24.3200 140.757 24.3200 -0.936
24.3360 240 24.5740 0 24.3360 260.860 24.3360 -1.341						24.3360 102 24.4283 0 24.3360 113.964 24.3360 -1.173						24.3360 130 24.4673 0 24.3360 140.242 24.3360 -0.891
24.3520 263 24.5900 0 24.3520 260.081 24.3520 0.179						24.3520 121 24.4443 0 24.3520 113.606 24.3520 0.667						24.3520 151 24.4833 0 24.3520 139.729 24.3520 0.911
24.3680 298 24.6060 0 24.3680 259.304 24.3680 2.234						24.3680 109 24.4603 0 24.3680 113.249 24.3680 -0.403						24.3680 150 24.4993 0 24.3680 139.217 24.3680 0.875
24.3840 261 24.6220 0 24.3840 258.531 24.3840 0.152						24.3840 117 24.4763 0 24.3840 112.895 24.3840 0.376						24.3840 132 24.5153 0 24.3840 138.708 24.3840 -0.580
24.4000 265 24.6380 0 24.4000 257.760 24.4000 0.443						24.4000 98 24.4923 0 24.4000 112.541 24.4000 -1.454						24.4000 156 24.5313 0 24.4000 138.202 24.4000 1.416
24.4160 256 24.6540 0 24.4160 256.991 24.4160 -0.062						24.4160 104 24.5083 0 24.4160 112.190 24.4160 -0.795						24.4160 135 24.5473 0 24.4160 137.697 24.4160 -0.230
24.4320 240 24.6700 0 24.4320 256.226 24.4320 -1.043						24.4320 125 24.5243 0 24.4320 111.840 24.4320 1.168						24.4320 133 24.5633 0 24.4320 137.194 24.4320 -0.361
24.4480 270 24.6860 0 24.4480 255.463 24.4480 0.881						24.4480 94 24.5403 0 24.4480 111.491 24.4480 -1.785						24.4480 121 24.5793 0 24.4480 136.693 24.4480 -1.415
24.4640 246 24.7020 0 24.4640 254.702 24.4640 -0.553						24.4640 104 24.5563 0 24.4640 111.144 24.4640 -0.694						24.4640 136 24.5953 0 24.4640 136.195 24.4640 -0.017
24.4800 280 24.7180 0 24.4800 253.945 24.4800 1.552						24.4800 124 24.5723 1 24.4800 110.799 24.4800 1.176						24.4800 121 24.6113 0 24.4800 135.698 24.4800 -1.325
24.4960 259 24.7340 0 24.4960 253.190 24.4960 0.360						24.4960 120 24.5883 1 24.4960 110.455 24.4960 0.864						24.4960 143 24.6273 0 24.4960 135.204 24.4960 0.647
24.5120 266 24.7500 0 24.5120 252.438 24.5120 0.828						24.5120 102 24.6043 0 24.5120 110.113 24.5120 -0.796						24.5120 135 24.6433 0 24.5120 134.711 24.5120 0.025
24.5280 267 24.7660 0 24.5280 251.688 24.5280 0.934						24.5280 104 24.6203 0 24.5280 109.773 24.5280 -0.561						24.5280 131 24.6593 0 24.5280 134.221 24.5280 -0.279
24.5440 256 24.7820 0 24.5440 250.941 24.5440 0.315						24.5440 100 24.6363 0 24.5440 109.433 24.5440 -0.934						24.5440 125 24.6753 0 24.5440 133.732 24.5440 -0.775
24.5600 261 24.7980 0 24.5600 250.197 24.5600 0.666						24.5600 101 24.6523 0 24.5600 109.096 24.5600 -0.798						24.5600 139 24.6913 0 24.5600 133.246 24.5600 0.485
24.5760 270 24.8140 0 24.5760 249.455 24.5760 1.246						24.5760 112 24.6683 0 24.5760 108.760 24.5760 0.303						24.5760 105 24.7073 0 24.5760 132.761 24.5760 -2.684
24.5920 244 24.8300 0 24.5920 248.716 24.5920 -0.301						24.5920 103 24.6843 0 24.5920 108.425 24.5920 -0.529						24.5920 128 24.7233 0 24.5920 132.279 24.5920 -0.375
24.6080 239 24.8460 0 24.6080 247.979 24.6080 -0.578						24.6080 92 24.7003 0 24.6080 108.092 24.6080 -1.660						24.6080 143 24.7393 0 24.6080 131.799 24.6080 0.930
24.6240 260 24.8620 0 24.6240 247.246 24.6240 0.788						24.6240 100 24.7163 0 24.6240 107.760 24.6240 -0.768						24.6240 139 24.7553 0 24.6240 131.320 24.6240 0.647
24.6400 270 24.8780 0 24.6400 246.514 24.6400 1.424						24.6400 91 24.7323 0 24.6400 107.430 24.6400 -1.704						24.6400 133 24.7713 0 24.6400 130.843 24.6400 0.186
24.6560 272 24.8940 1 24.6560 245.786 24.6560 1.584						24.6560 114 24.7483 0 24.6560 107.102 24.6560 0.641						24.6560 133 24.7873 0 24.6560 130.369 24.6560 0.226
24.6720 258 24.9100 0 24.6720 245.059 24.6720 0.803						24.6720 104 24.7643 0 24.6720 106.775 24.6720 -0.269						24.6720 126 24.8033 0 24.6720 129.896 24.6720 -0.344
24.6880 281 24.9260 0 24.6880 244.336 24.6880 2.179						24.6880 96 24.7803 0 24.6880 106.449 24.6880 -1.056						24.6880 131 24.8193 0 24.6880 129.426 24.6880 0.137
24.7040 245 24.9420 0 24.7040 243.615 24.7040 0.088						24.7040 99 24.7963 0 24.7040 106.125 24.7040 -0.709						24.7040 123 24.8353 0 24.7040 128.957 24.7040 -0.533
24.7200 249 24.9580 0 24.7200 242.896 24.7200 0.385						24.7200 104 24.8123 0 24.7200 105.802 24.7200 -0.175						24.7200 138 24.8513 0 24.7200 128.490 24.7200 0.804
24.7360 232 24.9740 0 24.7360 242.180 24.7360 -0.666						24.7360 118 24.8283 0 24.7360 105.481 24.7360 1.143						24.7360 132 24.8673 0 24.7360 128.025 24.7360 0.343
24.7520 259 24.9900 0 24.7520 241.467 24.7520 1.085						24.7520 116 24.8443 0 24.7520 105.161 24.7520 0.998						24.7520 124 24.8833 0 24.7520 127.562 24.7520 -0.317
24.7680 192 25.0060 0 24.7680 240.756 24.7680 -3.501						24.7680 100 24.8603 0 24.7680 104.842 24.7680 -0.479						24.7680 142 24.8993 0 24.7680 127.101 24.7680 1.242
24.7840 246 25.0220 0 24.7840 240.048 24.7840 0.378						24.7840 116 24.8763 0 24.7840 104.525 24.7840 1.056						24.7840 114 24.9153 0 24.7840 126.642 24.7840 -1.174
24.8000 240 25.0380 0 24.8000 239.342 24.8000 0.042						24.8000 96 24.8923 0 24.8000 104.210 24.8000 -0.829						24.8000 147 24.9313 0 24.8000 126.184 24.8000 1.705
24.8160 222 25.0540 0 24.8160 238.638 24.8160 -1.112						24.8160 107 24.9083 0 24.8160 103.896 24.8160 0.297						24.8160 135 24.9473 0 24.8160 125.729 24.8160 0.792
24.8320 255 25.0700 0 24.8320 237.937 24.8320 1.064						24.8320 97 24.9243 0 24.8320 103.583 24.8320 -0.662						24.8320 133 24.9633 0 24.8320 125.275 24.8320 0.665
24.8480 252 25.0860 0 24.8480 237.239 24.8480 0.926						24.8480 86 24.9403 0 24.8480 103.271 24.8480 -1.841						24.8480 106 24.9793 0 24.8480 124.824 24.8480 -1.811
24.8640 253 25.1020 0 24.8640 236.543 24.8640 1.031						24.8640 79 24.9563 0 24.8640 102.961 24.8640 -2.662						24.8640 151 24.9953 0 24.8640 124.374 24.8640 2.153
24.8800 223 25.1180 0 24.8800 235.849 24.8800 -0.857						24.8800 101 24.9723 0 24.8800 102.653 24.8800 -0.163						24.8800 115 25.0113 0 24.8800 123.926 24.8800 -0.825
24.8960 238 25.1340 0 24.8960 235.158 24.8960 0.183						24.8960 104 24.9883 0 24.8960 102.346 24.8960 0.161						24.8960 120 25.0273 0 24.8960 123.479 24.8960 -0.315
24.9120 232 25.1500 0 24.9120 234.470 24.9120 -0.161						24.9120 109 25.0043 0 24.9120 102.040 24.9120 0.661						24.9120 134 25.0433 0 24.9120 123.035 24.9120 0.940
24.9280 230 25.1660 0 24.9280 233.783 24.9280 -0.248						24.9280 108 25.0203 0 24.9280 101.736 24.9280 0.597						24.9280 115 25.0593 0 24.9280 122.593 24.9280 -0.702
24.9440 257 25.1820 0 24.9440 233.100 24.9440 1.485						24.9440 98 25.0363 0 24.9440 101.433 24.9440 -0.343						24.9440 145 25.0753 0 24.9440 122.152 24.9440 1.885
24.9600 250 25.1980 0 24.9600 232.418 24.9600 1.108						24.9600 107 25.0523 0 24.9600 101.131 24.9600 0.562						24.9600 134 25.0913 0 24.9600 121.713 24.9600 1.054
24.9760 219 25.2140 0 24.9760 231.739 24.9760 -0.857						24.9760 95 25.0683 1 24.9760 100.831 24.9760 -0.592						24.9760 114 25.1073 0 24.9760 121.276 24.9760 -0.676
24.9920 251 25.2300 0 24.9920 231.063 24.9920 1.253						24.9920 112 25.0843 0 24.9920 100.532 24.9920 1.074						24.9920 123 25.1233 1 24.9920 120.841 24.9920 0.193
25.0080 220 25.2460 0 25.0080 230.388 25.0080 -0.697						25.0080 111 25.1003 0 25.0080 0.000 25.0080 0.000						25.0080 104 25.1393 0 25.0080 120.407 25.0080 -1.594
25.0240 234 25.2620 0 25.0240 229.717 25.0240 0.279						25.0240 99 25.1163 0 25.0240 0.000 25.0240 0.000						25.0240 121 25.1553 0 25.0240 119.975 25.0240 0.092
25.0400 226 25.2780 0 25.0400 229.047 25.0400 -0.202						25.0400 89 25.1323 0 25.0400 0.000 25.0400 0.000						25.0400 88 25.1713 0 25.0400 119.545 25.0400 -3.325
25.0560 229 25.2940 0 25.0560 228.380 25.0560 0.041						25.0560 84 25.1483 0 25.0560 0.000 25.0560 0.000						25.0560 128 25.1873 0 25.0560 119.117 25.0560 0.779
25.0720 245 25.3100 0 25.0720 227.715 25.0720 1.100						25.0720 93 25.1643 0 25.0720 0.000 25.0720 0.000						25.0720 145 25.2033 0 25.0720 118.691 25.0720 2.170
25.0880 247 25.3260 0 25.0880 227.053 25.0880 1.264						25.0880 87 25.1803 0 25.0880 0.000 25.0880 0.000						25.0880 129 25.2193 0 25.0880 118.266 25.0880 0.938
25.1040 231 25.3420 0 25.1040 226.393 25.1040 0.302						25.1040 92 25.1963 0 25.1040 0.000 25.1040 0.000						25.1040 113 25.2353 0 25.1040 117.843 25.1040 -0.452
25.1200 252 25.3580 0 25.1200 225.735 25.1200 1.648						25.1200 93 25.2123 0 25.1200 0.000 25.1200 0.000						25.1200 113 25.2513 0 25.1200 117.422 25.1200 -0.412
25.1360 220 25.3740 0 25.1360 225.080 25.1360 -0.341						25.1360 98 25.2283 0 25.1360 0.000 25.1360 0.000						25.1360 126 25.2673 0 25.1360 117.002 25.1360 0.795
25.1520 221 25.3900 0 25.1520 224.426 25.1520 -0.229						25.1520 84 25.2443 0 25.1520 0.000 25.1520 0.000						25.1520 115 25.2833 0 25.1520 116.585 25.1520 -0.146
25.1680 230 25.4060 0 25.1680 223.776 25.1680 0.409						25.1680 102 25.2603 0 25.1680 0.000 25.1680 0.000						25.1680 112 25.2993 0 25.1680 116.169 25.1680 -0.390
25.1840 242 25.4220 0 25.1840 223.127 25.1840 1.208						25.1840 73 25.2763 0 25.1840 0.000 25.1840 0.000						25.1840 113 25.3153 0 25.1840 115.754 25.1840 -0.257
25.2000 238 25.4380 0 25.2000 222.481 25.2000 1.002						25.2000 94 25.2923 0 25.2000 0.000 25.2000 0.000						25.2000 125 25.3313 0 25.2000 115.342 25.2000 0.857
25.2160 232 25.4540 0 25.2160 221.837 25.2160 0.664						25.2160 95 25.3083 0 25.2160 0.000 25.2160 0.000						25.2160 125 25.3473 0 25.2160 114.931 25.2160 0.894
25.2320 190 25.4700 0 25.2320 221.195 25.2320 -2.251						25.2320 98 25.3243 0 25.2320 0.000 25.2320 0.000						25.2320 125 25.3633 0 25.2320 114.521 25.2320 0.930
25.2480 208 25.4860 1 25.2480 220.556 25.2480 -0.866						25.2480 84 25.3403 0 25.2480 0.000 25.2480 0.000						25.2480 122 25.3793 0 25.2480 114.114 25.2480 0.708
25.2640 221 25.5020 0 25.2640 219.919 25.2640 0.072						25.2640 97 25.3563 0 25.2640 0.000 25.2640 0.000						25.2640 112 25.3953 0 25.2640 113.708 25.2640 -0.160
25.2800 232 25.5180 0 25.2800 219.284 25.2800 0.831						25.2800 99 25.3723 0 25.2800 0.000 25.2800 0.000						25.2800 118 25.4113 0 25.2800 113.304 25.2800 0.429
25.2960 219 25.5340 0 25.2960 218.651 25.2960 0.023						25.2960 85 25.3883 0 25.2960 0.000 25.2960 0.000						25.2960 107 25.4273 0 25.2960 112.901 25.2960 -0.565
25.3120 229 25.5500 0 25.3120 218.021 25.3120 0.722						25.3120 92 25.4043 0 25.3120 0.000 25.3120 0.000						25.3120 119 25.4433 0 25.3120 112.500 25.3120 0.591
25.3280 203 25.5660 0 25.3280 217.392 25.3280 -1.005						25.3280 80 25.4203 0 25.3280 0.000 25.3280 0.000						25.3280 99 25.4593 0 25.3280 112.101 25.3280 -1.304
25.3440 242 25.5820 0 25.3440 216.766 25.3440 1.615						25.3440 87 25.4363 0 25.3440 0.000 25.3440 0.000						25.3440 103 25.4753 0 25.3440 111.703 25.3440 -0.849
25.3600 210 25.5980 0 25.3600 216.143 25.3600 -0.422						25.3600 96 25.4523 0 25.3600 0.000 25.3600 0.000						25.3600 111 25.4913 0 25.3600 111.307 25.3600 -0.029
25.3760 245 25.6140 0 25.3760 215.521 25.3760 1.876						25.3760 95 25.4683 0 25.3760 0.000 25.3760 0.000						25.3760 103 25.5073 0 25.3760 110.913 25.3760 -0.772
25.3920 226 25.6300 0 25.3920 214.902 25.3920 0.735						25.3920 78 25.4843 0 25.3920 0.000 25.3920 0.000						25.3920 113 25.5233 0 25.3920 110.520 25.3920 0.231
25.4080 210 25.6460 0 25.4080 214.284 25.4080 -0.294						25.4080 75 25.5003 0 25.4080 0.000 25.4080 0.000						25.4080 106 25.5393 0 25.4080 110.129 25.4080 -0.397
25.4240 214 25.6620 0 25.4240 213.669 25.4240 0.022						25.4240 95 25.5163 0 25.4240 0.000 25.4240 0.000						25.4240 107 25.5553 0 25.4240 109.740 25.4240 -0.262
25.4400 241 25.6780 0 25.4400 213.057 25.4400 1.793						25.4400 83 25.5323 0 25.4400 0.000 25.4400 0.000						25.4400 112 25.5713 0 25.4400 109.352 25.4400 0.248
25.4560 214 25.6940 0 25.4560 212.446 25.4560 0.106						25.4560 72 25.5483 0 25.4560 0.000 25.4560 0.000						25.4560 110 25.5873 0 25.4560 108.965 25.4560 0.098
25.4720 227 25.7100 0 25.4720 211.837 25.4720 1.002						25.4720 79 25.5643 0 25.4720 0.000 25.4720 0.000						25.4720 105 25.6033 0 25.4720 108.580 25.4720 -0.346
25.4880 220 25.7260 0 25.4880 211.231 25.4880 0.589						25.4880 93 25.5803 0 25.4880 0.000 25.4880 0.000						25.4880 93 25.6193 1 25.4880 108.197 25.4880 -1.559
25.5040 211 25.7420 0 25.5040 210.627 25.5040 0.026						25.5040 81 25.5963 0 25.5040 0.000 25.5040 0.000						25.5040 95 25.6353 0 25.5040 107.816 25.5040 -1.301
25.5200 189 25.7580 0 25.5200 210.024 25.5200 -1.521						25.5200 87 25.6123 0 25.5200 0.000 25.5200 0.000						25.5200 114 25.6513 0 25.5200 107.436 25.5200 0.610
25.5360 207 25.7740 0 25.5360 209.424 25.5360 -0.168						25.5360 77 25.6283 0 25.5360 0.000 25.5360 0.000						25.5360 115 25.6673 0 25.5360 107.057 25.5360 0.734
25.5520 227 25.7900 1 25.5520 208.826 25.5520 1.201						25.5520 91 25.6443 0 25.5520 0.000 25.5520 0.000						25.5520 113 25.6833 0 25.5520 106.680 25.5520 0.589
25.5680 209 25.8060 0 25.5680 208.231 25.5680 0.053						25.5680 72 25.6603 0 25.5680 0.000 25.5680 0.000						25.5680 96 25.6993 0 25.5680 106.305 25.5680 -1.041
25.5840 205 25.8220 0 25.5840 207.637 25.5840 -0.183						25.5840 79 25.6763 0 25.5840 0.000 25.5840 0.000						25.5840 109 25.7153 0 25.5840 105.931 25.5840 0.291
25.6000 227 25.8380 1 25.6000 207.045 25.6000 1.319						25.6000 85 25.6923 0 25.6000 0.000 25.6000 0.000						25.6000 104 25.7313 0 25.6000 105.559 25.6000 -0.151
25.6160 208 25.8540 0 25.6160 206.456 25.6160 0.107						25.6160 66 25.7083 0 25.6160 0.000 25.6160 0.000						25.6160 108 25.7473 0 25.6160 0.000 25.6160 0.000
25.6320 248 25.8700 0 25.6320 205.868 25.6320 2.665						25.6320 80 25.7243 0 25.6320 0.000 25.6320 0.000						25.6320 97 25.7633 0 25.6320 0.000 25.6320 0.000
25.6480 204 25.8860 0 25.6480 205.283 25.6480 -0.089						25.6480 94 25.7403 0 25.6480 0.000 25.6480 0.000						25.6480 92 25.7793 0 25.6480 0.000 25.6480 0.000
25.6640 252 25.9020 0 25.6640 204.700 25.6640 2.968						25.6640 78 25.7563 0 25.6640 0.000 25.6640 0.000						25.6640 104 25.7953 0 25.6640 0.000 25.6640 0.000
25.6800 181 25.9180 0 25.6800 204.119 25.6800 -1.709						25.6800 78 25.7723 0 25.6800 0.000 25.6800 0.000						25.6800 86 25.8113 0 25.6800 0.000 25.6800 0.000
25.6960 197 25.9340 0 25.6960 203.539 25.6960 -0.464						25.6960 53 25.7883 0 25.6960 0.000 25.6960 0.000						25.6960 106 25.8273 0 25.6960 0.000 25.6960 0.000
25.7120 222 25.9500 0 25.7120 202.962 25.7120 1.272						25.7120 90 25.8043 0 25.7120 0.000 25.7120 0.000						25.7120 102 25.8433 0 25.7120 0.000 25.7120 0.000
25.7280 188 25.9660 0 25.7280 202.387 25.7280 -1.044						25.7280 82 25.8203 0 25.7280 0.000 25.7280 0.000						25.7280 92 25.8593 0 25.7280 0.000 25.7280 0.000
25.7440 202 25.9820 0 25.7440 201.814 25.7440 0.013						25.7440 100 25.8363 0 25.7440 0.000 25.7440 0.000						25.7440 110 25.8753 0 25.7440 0.000 25.7440 0.000
25.7600 206 25.9980 0 25.7600 201.243 25.7600 0.330						25.7600 75 25.8523 0 25.7600 0.000 25.7600 0.000						25.7600 99 25.8913 0 25.7600 0.000 25.7600 0.000
25.7760 236 26.0140 0 25.7760 200.674 25.7760 2.290						25.7760 80 25.8683 0 25.7760 0.000 25.7760 0.000						25.7760 83 25.9073 0 25.7760 0.000 25.7760 0.000
25.7920 195 26.0300 0 25.7920 200.107 25.7920 -0.364						25.7920 84 25.8843 0 25.7920 0.000 25.7920 0.000						25.7920 78 25.9233 0 25.7920 0.000 25.7920 0.000
25.8080 187 26.0460 0 25.8080 199.542 25.8080 -0.912						25.8080 90 25.9003 0 25.8080 0.000 25.8080 0.000						25.8080 105 25.9393 0 25.8080 0.000 25.8080 0.000
25.8240 194 26.0620 0 25.8240 198.979 25.8240 -0.356						25.8240 64 25.9163 0 25.8240 0.000 25.8240 0.000						25.8240 111 25.9553 0 25.8240 0.000 25.8240 0.000
25.8400 204 26.0780 0 25.8400 198.418 25.8400 0.389						25.8400 78 25.9323 0 25.8400 0.000 25.8400 0.000						25.8400 122 25.9713 0 25.8400 0.000 25.8400 0.000
25.8560 199 26.0940 0 25.8560 197.859 25.8560 0.081						25.8560 88 25.9483 0 25.8560 0.000 25.8560 0.000						25.8560 101 25.9873 0 25.8560 0.000 25.8560 0.000
25.8720 188 26.1100 0 25.8720 197.301 25.8720 -0.675						25.8720 62 25.9643 0 25.8720 0.000 25.8720 0.000						25.8720 88 26.0033 0 25.8720 0.000 25.8720 0.000
25.8880 175 26.1260 0 25.8880 196.746 25.8880 -1.635						25.8880 67 25.9803 0 25.8880 0.000 25.8880 0.000						25.8880 98 26.0193 0 25.8880 0.000 25.8880 0.000
25.9040 182 26.1420 0 25.9040 196.193 25.9040 -1.046						25.9040 85 25.9963 0 25.9040 0.000 25.9040 0.000						25.9040 78 26.0353 0 25.9040 0.000 25.9040 0.000
25.9200 185 26.1580 0 25.9200 195.642 25.9200 -0.778						25.9200 85 26.0123 0 25.9200 0.000 25.9200 0.000						25.9200 100 26.0513 0 25.9200 0.000 25.9200 0.000
25.9360 217 26.1740 0 25.9360 195.093 25.9360 1.480						25.9360 97 26.0283 0 25.9360 0.000 25.9360 0.000						25.9360 96 26.0673 0 25.9360 0.000 25.9360 0.000
25.9520 215 26.1900 0 25.9520 194.545 25.9520 1.389						25.9520 76 26.0443 0 25.9520 0.000 25.9520 0.000						25.9520 110 26.0833 0 25.9520 0.000 25.9520 0.000
25.9680 204 26.2060 0 25.9680 194.000 25.9680 0.697						25.9680 76 26.0603 0 25.9680 0.000 25.9680 0.000						25.9680 73 26.0993 0 25.9680 0.000 25.9680 0.000
25.9840 198 26.2220 1 25.9840 193.456 25.9840 0.321						25.9840 70 26.0763 0 25.9840 0.000 25.9840 0.000						25.9840 94 26.1153 0 25.9840 0.000 25.9840 0.000
26.0000 198 26.2380 0 26.0000 192.915 26.0000 0.360						26.0000 86 26.0923 0 26.0000 0.000 26.0000 0.000						26.0000 83 26.1313 0 26.0000 0.000 26.0000 0.000
26.0160 225 26.2540 0 26.0160 192.375 26.0160 2.165						26.0160 71 26.1083 0 26.0160 0.000 26.0160 0.000						26.0160 109 26.1473 0 26.0160 0.000 26.0160 0.000
26.0320 190 26.2700 1 26.0320 191.837 26.0320 -0.133						26.0320 84 26.1243 0 26.0320 0.000 26.0320 0.000						26.0320 109 26.1633 0 26.0320 0.000 26.0320 0.000
26.0480 205 26.2860 0 26.0480 191.301 26.0480 0.952						26.0480 75 26.1403 0 26.0480 0.000 26.0480 0.000						26.0480 88 26.1793 0 26.0480 0.000 26.0480 0.000
26.0640 206 26.3020 1 26.0640 190.767 26.0640 1.056						26.0640 80 26.1563 0 26.0640 0.000 26.0640 0.000						26.0640 86 26.1953 0 26.0640 0.000 26.0640 0.000
26.0800 196 26.3180 0 26.0800 190.235 26.0800 0.410						26.0800 85 26.1723 1 26.0800 0.000 26.0800 0.000						26.0800 104 26.2113 0 26.0800 0.000 26.0800 0.000
26.0960 193 26.3340 0 26.0960 189.705 26.0960 0.236						26.0960 74 26.1883 0 26.0960 0.000 26.0960 0.000						26.0960 113 26.2273 0 26.0960 0.000 26.0960 0.000
26.1120 199 26.3500 0 26.1120 189.177 26.1120 0.693						26.1120 58 26.2043 0 26.1120 0.000 26.1120 0.000						26.1120 91 26.2433 0 26.1120 0.000 26.1120 0.000
26.1280 212 26.3660 0 26.1280 188.650 26.1280 1.596						26.1280 63 26.2203 0 26.1280 0.000 26.1280 0.000						26.1280 84 26.2593 0 26.1280 0.000 26.1280 0.000
26.1440 206 26.3820 0 26.1440 188.125 26.1440 1.239						26.1440 69 26.2363 0 26.1440 0.000 26.1440 0.000						26.1440 81 26.2753 0 26.1440 0.000 26.1440 0.000
26.1600 184 26.3980 0 26.1600 187.603 26.1600 -0.264						26.1600 78 26.2523 0 26.1600 0.000 26.1600 0.000						26.1600 101 26.2913 0 26.1600 0.000 26.1600 0.000
26.1760 186 26.4140 0 26.1760 187.082 26.1760 -0.079						26.1760 88 26.2683 0 26.1760 0.000 26.1760 0.000						26.1760 105 26.3073 0 26.1760 0.000 26.1760 0.000
26.1920 211 26.4300 0 26.1920 186.563 26.1920 1.674						26.1920 72 26.2843 0 26.1920 0.000 26.1920 0.000						26.1920 87 26.3233 0 26.1920 0.000 26.1920 0.000
26.2080 201 26.4460 0 26.2080 186.045 26.2080 1.050						26.2080 64 26.3003 0 26.2080 0.000 26.2080 0.000						26.2080 102 26.3393 0 26.2080 0.000 26.2080 0.000
26.2240 196 26.4620 0 26.2240 185.530 26.2240 0.744						26.2240 64 26.3163 1 26.2240 0.000 26.2240 0.000						26.2240 87 26.3553 0 26.2240 0.000 26.2240 0.000
26.2400 188 26.4780 0 26.2400 185.016 26.2400 0.216						26.2400 57 26.3323 0 26.2400 0.000 26.2400 0.000						26.2400 78 26.3713 0 26.2400 0.000 26.2400 0.000
26.2560 180 26.4940 0 26.2560 184.504 26.2560 -0.334						26.2560 69 26.3483 0 26.2560 0.000 26.2560 0.000						26.2560 97 26.3873 0 26.2560 0.000 26.2560 0.000
26.2720 161 26.5100 0 26.2720 183.994 26.2720 -1.801						26.2720 70 26.3643 0 26.2720 0.000 26.2720 0.000						26.2720 89 26.4033 0 26.2720 0.000 26.2720 0.000
26.2880 190 26.5260 0 26.2880 183.486 26.2880 0.470						26.2880 76 26.3803 0 26.2880 0.000 26.2880 0.000						26.2880 81 26.4193 0 26.2880 0.000 26.2880 0.000
26.3040 176 26.5420 0 26.3040 182.980 26.3040 -0.523						26.3040 81 26.3963 0 26.3040 0.000 26.3040 0.000						26.3040 99 26.4353 0 26.3040 0.000 26.3040 0.000
26.3200 198 26.5580 0 26.3200 182.475 26.3200 1.098						26.3200 74 26.4123 0 26.3200 0.000 26.3200 0.000						26.3200 93 26.4513 0 26.3200 0.000 26.3200 0.000
26.3360 178 26.5740 0 26.3360 181.972 26.3360 -0.296						26.3360 75 26.4283 0 26.3360 0.000 26.3360 0.000						26.3360 86 26.4673 0 26.3360 0.000 26.3360 0.000
26.3520 171 26.5900 0 26.3520 181.471 26.3520 -0.796						26.3520 75 26.4443 0 26.3520 0.000 26.3520 0.000						26.3520 72 26.4833 0 26.3520 0.000 26.3520 0.000
26.3680 166 26.6060 0 26.3680 180.972 26.3680 -1.155						26.3680 69 26.4603 0 26.3680 0.000 26.3680 0.000						26.3680 82 26.4993 0 26.3680 0.000 26.3680 0.000
26.3840 185 26.6220 0 26.3840 180.474 26.3840 0.331						26.3840 73 26.4763 0 26.3840 0.000 26.3840 0.000						26.3840 91 26.5153 1 26.3840 0.000 26.3840 0.000
26.4000 159 26.6380 0 26.4000 179.978 26.4000 -1.653						26.4000 76 26.4923 0 26.4000 0.000 26.4000 0.000						26.4000 79 26.5313 0 26.4000 0.000 26.4000 0.000
26.4160 176 26.6540 0 26.4160 179.484 26.4160 -0.261						26.4160 59 26.5083 0 26.4160 0.000 26.4160 0.000						26.4160 81 26.5473 0 26.4160 0.000 26.4160 0.000
26.4320 162 26.6700 1 26.4320 178.992 26.4320 -1.327						26.4320 76 26.5243 0 26.4320 0.000 26.4320 0.000						26.4320 87 26.5633 0 26.4320 0.000 26.4320 0.000
26.4480 176 26.6860 0 26.4480 178.501 26.4480 -0.187						26.4480 75 26.5403 0 26.4480 0.000 26.4480 0.000						26.4480 80 26.5793 0 26.4480 0.000 26.4480 0.000
26.4640 172 26.7020 0 26.4640 178.013 26.4640 -0.456						26.4640 65 26.5563 0 26.4640 0.000 26.4640 0.000						26.4640 101 26.5953 0 26.4640 0.000 26.4640 0.000
26.4800 157 26.7180 0 26.4800 177.525 26.4800 -1.628						26.4800 67 26.5723 0 26.4800 0.000 26.4800 0.000						26.4800 80 26.6113 0 26.4800 0.000 26.4800 0.000
26.4960 186 26.7340 0 26.4960 177.040 26.4960 0.653						26.4960 77 26.5883 0 26.4960 0.000 26.4960 0.000						26.4960 84 26.6273 0 26.4960 0.000 26.4960 0.000
26.5120 170 26.7500 0 26.5120 176.556 26.5120 -0.500						26.5120 74 26.6043 0 26.5120 0.000 26.5120 0.000						26.5120 104 26.6433 0 26.5120 0.000 26.5120 0.000
26.5280 173 26.7660 1 26.5280 176.074 26.5280 -0.232						26.5280 57 26.6203 0 26.5280 0.000 26.5280 0.000						26.5280 89 26.6593 0 26.5280 0.000 26.5280 0.000
26.5440 177 26.7820 0 26.5440 175.594 26.5440 0.105						26.5440 80 26.6363 0 26.5440 0.000 26.5440 0.000						26.5440 85 26.6753 0 26.5440 0.000 26.5440 0.000
26.5600 174 26.7980 0 26.5600 175.115 26.5600 -0.084						26.5600 82 26.6523 0 26.5600 0.000 26.5600 0.000						26.5600 97 26.6913 0 26.5600 0.000 26.5600 0.000
26.5760 160 26.8140 0 26.5760 174.639 26.5760 -1.150						26.5760 49 26.6683 0 26.5760 0.000 26.5760 0.000						26.5760 77 26.7073 1 26.5760 0.000 26.5760 0.000
26.5920 202 26.8300 0 26.5920 174.163 26.5920 1.949						26.5920 67 26.6843 0 26.5920 0.000 26.5920 0.000						26.5920 76 26.7233 0 26.5920 0.000 26.5920 0.000
26.6080 199 26.8460 1 26.6080 173.690 26.6080 1.785						26.6080 68 26.7003 0 26.6080 0.000 26.6080 0.000						26.6080 89 26.7393 0 26.6080 0.000 26.6080 0.000
26.6240 185 26.8620 0 26.6240 173.218 26.6240 0.862						26.6240 70 26.7163 0 26.6240 0.000 26.6240 0.000						26.6240 89 26.7553 0 26.6240 0.000 26.6240 0.000
26.6400 187 26.8780 0 26.6400 172.748 26.6400 1.037						26.6400 62 26.7323 0 26.6400 0.000 26.6400 0.000						26.6400 79 26.7713 0 26.6400 0.000 26.6400 0.000
26.6560 175 26.8940 0 26.6560 172.279 26.6560 0.205						26.6560 58 26.7483 0 26.6560 0.000 26.6560 0.000						26.6560 76 26.7873 0 26.6560 0.000 26.6560 0.000
26.6720 165 26.9100 1 26.6720 171.812 26.6720 -0.527						26.6720 78 26.7643 0 26.6720 0.000 26.6720 0.000						26.6720 75 26.8033 0 26.6720 0.000 26.6720 0.000
26.6880 178 26.9260 0 26.6880 171.347 26.6880 0.496						26.6880 60 26.7803 0 26.6880 0.000 26.6880 0.000						26.6880 86 26.8193 0 26.6880 0.000 26.6880 0.000
26.7040 208 26.9420 0 26.7040 170.883 26.7040 2.561						26.7040 76 26.7963 0 26.7040 0.000 26.7040 0.000						26.7040 81 26.8353 0 26.7040 0.000 26.7040 0.000
26.7200 200 26.9580 0 26.7200 170.421 26.7200 2.081						26.7200 64 26.8123 1 26.7200 0.000 26.7200 0.000						26.7200 73 26.8513 0 26.7200 0.000 26.7200 0.000
26.7360 176 26.9740 0 26.7360 169.961 26.7360 0.453						26.7360 65 26.8283 0 26.7360 0.000 26.7360 0.000						26.7360 75 26.8673 0 26.7360 0.000 26.7360 0.000
26.7520 166 26.9900 0 26.7520 169.502 26.7520 -0.270						26.7520 55 26.8443 0 26.7520 0.000 26.7520 0.000						26.7520 91 26.8833 0 26.7520 0.000 26.7520 0.000
26.7680 170 27.0060 0 26.7680 169.045 26.7680 0.073						26.7680 67 26.8603 0 26.7680 0.000 26.7680 0.000						26.7680 80 26.8993 0 26.7680 0.000 26.7680 0.000
26.7840 197 27.0220 0 26.7840 168.590 26.7840 2.014						26.7840 73 26.8763 0 26.7840 0.000 26.7840 0.000						26.7840 88 26.9153 0 26.7840 0.000 26.7840 0.000
26.8000 170 27.0380 0 26.8000 168.136 26.8000 0.142						26.8000 66 26.8923 0 26.8000 0.000 26.8000 0.000						26.8000 86 26.9313 0 26.8000 0.000 26.8000 0.000
26.8160 190 27.0540 0 26.8160 167.683 26.8160 1.611						26.8160 47 26.9083 0 26.8160 0.000 26.8160 0.000						26.8160 70 26.9473 0 26.8160 0.000 26.8160 0.000
26.8320 188 27.0700 0 26.8320 167.233 26.8320 1.507						26.8320 52 26.9243 0 26.8320 0.000 26.8320 0.000						26.8320 83 26.9633 0 26.8320 0.000 26.8320 0.000
26.8480 172 27.0860 0 26.8480 166.784 26.8480 0.395						26.8480 64 26.9403 0 26.8480 0.000 26.8480 0.000						26.8480 82 26.9793 0 26.8480 0.000 26.8480 0.000
26.8640 166 27.1020 0 26.8640 166.336 26.8640 -0.026						26.8640 60 26.9563 0 26.8640 0.000 26.8640 0.000						26.8640 71 26.9953 0 26.8640 0.000 26.8640 0.000
26.8800 165 27.1180 0 26.8800 165.890 26.8800 -0.069						26.8800 77 26.9723 0 26.8800 0.000 26.8800 0.000						26.8800 63 27.0113 0 26.8800 0.000 26.8800 0.000
26.8960 181 27.1340 0 26.8960 165.446 26.8960 1.150						26.8960 65 26.9883 0 26.8960 0.000 26.8960 0.000						26.8960 86 27.0273 0 26.8960 0.000 26.8960 0.000
26.9120 171 27.1500 1 26.9120 165.003 26.9120 0.456						26.9120 65 27.0043 0 26.9120 0.000 26.9120 0.000						26.9120 75 27.0433 0 26.9120 0.000 26.9120 0.000
26.9280 177 27.1660 0 26.9280 164.562 26.9280 0.930						26.9280 53 27.0203 0 26.9280 0.000 26.9280 0.000						26.9280 81 27.0593 0 26.9280 0.000 26.9280 0.000
26.9440 145 27.1820 0 26.9440 164.122 26.9440 -1.577						26.9440 67 27.0363 0 26.9440 0.000 26.9440 0.000						26.9440 92 27.0753 0 26.9440 0.000 26.9440 0.000
26.9600 168 27.1980 0 26.9600 163.684 26.9600 0.331						26.9600 79 27.0523 0 26.9600 0.000 26.9600 0.000						26.9600 74 27.0913 0 26.9600 0.000 26.9600 0.000
26.9760 167 27.2140 0 26.9760 163.247 26.9760 0.289						26.9760 78 27.0683 0 26.9760 0.000 26.9760 0.000						26.9760 87 27.1073 0 26.9760 0.000 26.9760 0.000
26.9920 153 27.2300 0 26.9920 162.812 26.9920 -0.788						26.9920 48 27.0843 0 26.9920 0.000 26.9920 0.000						26.9920 94 27.1233 0 26.9920 0.000 26.9920 0.000
27.0080 166 27.2460 0 27.0080 162.379 27.0080 0.279						27.0080 69 27.1003 0 27.0080 0.000 27.0080 0.000						27.0080 64 27.1393 0 27.0080 0.000 27.0080 0.000
27.0240 177 27.2620 0 27.0240 161.947 27.0240 1.125						27.0240 60 27.1163 0 27.0240 0.000 27.0240 0.000						27.0240 75 27.1553 0 27.0240 0.000 27.0240 0.000
27.0400 161 27.2780 0 27.0400 161.516 27.0400 -0.040						27.0400 71 27.1323 0 27.0400 0.000 27.0400 0.000						27.0400 64 27.1713 0 27.0400 0.000 27.0400 0.000
27.0560 162 27.2940 0 27.0560 161.087 27.0560 0.071						27.0560 67 27.1483 0 27.0560 0.000 27.0560 0.000						27.0560 93 27.1873 0 27.0560 0.000 27.0560 0.000
27.0720 166 27.3100 0 27.0720 160.660 27.0720 0.412						27.0720 76 27.1643 0 27.0720 0.000 27.0720 0.000						27.0720 87 27.2033 0 27.0720 0.000 27.0720 0.000
27.0880 164 27.3260 0 27.0880 160.234 27.0880 0.292						27.0880 58 27.1803 0 27.0880 0.000 27.0880 0.000						27.0880 59 27.2193 0 27.0880 0.000 27.0880 0.000
27.1040 169 27.3420 0 27.1040 159.809 27.1040 0.703						27.1040 63 27.1963 0 27.1040 0.000 27.1040 0.000						27.1040 87 27.2353 0 27.1040 0.000 27.1040 0.000
27.1200 185 27.3580 0 27.1200 159.387 27.1200 1.873						27.1200 55 27.2123 0 27.1200 0.000 27.1200 0.000						27.1200 83 27.2513 0 27.1200 0.000 27.1200 0.000
27.1360 153 27.3740 0 27.1360 158.965 27.1360 -0.479						27.1360 54 27.2283 0 27.1360 0.000 27.1360 0.000						27.1360 78 27.2673 0 27.1360 0.000 27.1360 0.000
27.1520 159 27.3900 0 27.1520 158.545 27.1520 0.036						27.1520 66 27.2443 0 27.1520 0.000 27.1520 0.000						27.1520 79 27.2833 0 27.1520 0.000 27.1520 0.000
27.1680 158 27.4060 0 27.1680 158.127 27.1680 -0.010						27.1680 66 27.2603 0 27.1680 0.000 27.1680 0.000						27.1680 78 27.2993 0 27.1680 0.000 27.1680 0.000
27.1840 136 27.4220 0 27.1840 157.710 27.1840 -1.848						27.1840 73 27.2763 0 27.1840 0.000 27.1840 0.000						27.1840 67 27.3153 0 27.1840 0.000 27.1840 0.000
27.2000 170 27.4380 0 27.2000 157.294 27.2000 0.969						27.2000 62 27.2923 0 27.2000 0.000 27.2000 0.000						27.2000 67 27.3313 0 27.2000 0.000 27.2000 0.000
27.2160 170 27.4540 0 27.2160 156.880 27.2160 1.000						27.2160 50 27.3083 0 27.2160 0.000 27.2160 0.000						27.2160 60 27.3473 0 27.2160 0.000 27.2160 0.000
27.2320 159 27.4700 0 27.2320 156.467 27.2320 0.200						27.2320 63 27.3243 0 27.2320 0.000 27.2320 0.000						27.2320 68 27.3633 0 27.2320 0.000 27.2320 0.000
27.2480 156 27.4860 0 27.2480 156.056 27.2480 -0.004						27.2480 61 27.3403 0 27.2480 0.000 27.2480 0.000						27.2480 82 27.3793 0 27.2480 0.000 27.2480 0.000
27.2640 161 27.5020 0 27.2640 155.647 27.2640 0.419						27.2640 61 27.3563 0 27.2640 0.000 27.2640 0.000						27.2640 72 27.3953 0 27.2640 0.000 27.2640 0.000
27.2800 164 27.5180 0 27.2800 155.238 27.2800 0.680						27.2800 62 27.3723 0 27.2800 0.000 27.2800 0.000						27.2800 59 27.4113 0 27.2800 0.000 27.2800 0.000
27.2960 155 27.5340 0 27.2960 154.832 27.2960 0.013						27.2960 61 27.3883 0 27.2960 0.000 27.2960 0.000						27.2960 64 27.4273 0 27.2960 0.000 27.2960 0.000
27.3120 136 27.5500 0 27.3120 154.426 27.3120 -1.569						27.3120 39 27.4043 0 27.3120 0.000 27.3120 0.000						27.3120 62 27.4433 0 27.3120 0.000 27.3120 0.000
27.3280 164 27.5660 0 27.3280 154.022 27.3280 0.774						27.3280 47 27.4203 0 27.3280 0.000 27.3280 0.000						27.3280 72 27.4593 0 27.3280 0.000 27.3280 0.000
27.3440 160 27.5820 0 27.3440 153.620 27.3440 0.501						27.3440 62 27.4363 0 27.3440 0.000 27.3440 0.000						27.3440 80 27.4753 0 27.3440 0.000 27.3440 0.000
27.3600 149 27.5980 0 27.3600 153.219 27.3600 -0.343						27.3600 63 27.4523 0 27.3600 0.000 27.3600 0.000						27.3600 88 27.4913 0 27.3600 0.000 27.3600 0.000
27.3760 165 27.6140 0 27.3760 152.819 27.3760 0.943						27.3760 38 27.4683 0 27.3760 0.000 27.3760 0.000						27.3760 70 27.5073 0 27.3760 0.000 27.3760 0.000
27.3920 172 27.6300 0 27.3920 152.421 27.3920 1.484						27.3920 56 27.4843 0 27.3920 0.000 27.3920 0.000						27.3920 75 27.5233 0 27.3920 0.000 27.3920 0.000
27.4080 158 27.6460 0 27.4080 152.024 27.4080 0.472						27.4080 63 27.5003 0 27.4080 0.000 27.4080 0.000						27.4080 68 27.5393 0 27.4080 0.000 27.4080 0.000
27.4240 148 27.6620 0 27.4240 151.628 27.4240 -0.296						27.4240 51 27.5163 0 27.4240 0.000 27.4240 0.000						27.4240 62 27.5553 0 27.4240 0.000 27.4240 0.000
27.4400 152 27.6780 0 27.4400 151.234 27.4400 0.062						27.4400 81 27.5323 0 27.4400 0.000 27.4400 0.000						27.4400 67 27.5713 0 27.4400 0.000 27.4400 0.000
27.4560 140 27.6940 0 27.4560 150.841 27.4560 -0.910						27.4560 49 27.5483 0 27.4560 0.000 27.4560 0.000						27.4560 57 27.5873 0 27.4560 0.000 27.4560 0.000
27.4720 142 27.7100 0 27.4720 150.450 27.4720 -0.704						27.4720 78 27.5643 0 27.4720 0.000 27.4720 0.000						27.4720 78 27.6033 0 27.4720 0.000 27.4720 0.000
27.4880 171 27.7260 0 27.4880 150.060 27.4880 1.592						27.4880 62 27.5803 0 27.4880 0.000 27.4880 0.000						27.4880 64 27.6193 0 27.4880 0.000 27.4880 0.000
27.5040 152 27.7420 0 27.5040 149.672 27.5040 0.188						27.5040 51 27.5963 0 27.5040 0.000 27.5040 0.000						27.5040 61 27.6353 0 27.5040 0.000 27.5040 0.000
27.5200 158 27.7580 1 27.5200 149.285 27.5200 0.689						27.5200 50 27.6123 0 27.5200 0.000 27.5200 0.000						27.5200 82 27.6513 0 27.5200 0.000 27.5200 0.000
27.5360 150 27.7740 0 27.5360 148.899 27.5360 0.089						27.5360 64 27.6283 0 27.5360 0.000 27.5360 0.000						27.5360 66 27.6673 0 27.5360 0.000 27.5360 0.000
27.5520 158 27.7900 0 27.5520 148.514 27.5520 0.750						27.5520 52 27.6443 0 27.5520 0.000 27.5520 0.000						27.5520 61 27.6833 0 27.5520 0.000 27.5520 0.000
27.5680 154 27.8060 0 27.5680 148.131 27.5680 0.470						27.5680 46 27.6603 0 27.5680 0.000 27.5680 0.000						27.5680 71 27.6993 0 27.5680 0.000 27.5680 0.000
27.5840 138 27.8220 0 27.5840 147.749 27.5840 -0.824						27.5840 60 27.6763 0 27.5840 0.000 27.5840 0.000						27.5840 65 27.7153 0 27.5840 0.000 27.5840 0.000
27.6000 165 27.8380 0 27.6000 147.369 27.6000 1.364						27.6000 53 27.6923 0 27.6000 0.000 27.6000 0.000						27.6000 71 27.7313 0 27.6000 0.000 27.6000 0.000
27.6160 174 27.8540 0 27.6160 146.990 27.6160 2.036						27.6160 52 27.7083 0 27.6160 0.000 27.6160 0.000						27.6160 81 27.7473 0 27.6160 0.000 27.6160 0.000
27.6320 148 27.8700 0 27.6320 146.612 27.6320 0.113						27.6320 47 27.7243 0 27.6320 0.000 27.6320 0.000						27.6320 60 27.7633 0 27.6320 0.000 27.6320 0.000
27.6480 147 27.8860 0 27.6480 146.236 27.6480 0.063						27.6480 45 27.7403 0 27.6480 0.000 27.6480 0.000						27.6480 66 27.7793 0 27.6480 0.000 27.6480 0.000
27.6640 140 27.9020 0 27.6640 145.861 27.6640 -0.492						27.6640 57 27.7563 1 27.6640 0.000 27.6640 0.000						27.6640 75 27.7953 0 27.6640 0.000 27.6640 0.000
27.6800 159 27.9180 0 27.6800 145.487 27.6800 1.065						27.6800 57 27.7723 0 27.6800 0.000 27.6800 0.000						27.6800 67 27.8113 1 27.6800 0.000 27.6800 0.000
27.6960 147 27.9340 0 27.6960 145.115 27.6960 0.154						27.6960 54 27.7883 0 27.6960 0.000 27.6960 0.000						27.6960 61 27.8273 0 27.6960 0.000 27.6960 0.000
27.7120 132 27.9500 0 27.7120 144.744 27.7120 -1.101						27.7120 51 27.8043 0 27.7120 0.000 27.7120 0.000						27.7120 89 27.8433 0 27.7120 0.000 27.7120 0.000
27.7280 135 27.9660 0 27.7280 144.374 27.7280 -0.801						27.7280 57 27.8203 0 27.7280 0.000 27.7280 0.000						27.7280 62 27.8593 0 27.7280 0.000 27.7280 0.000
27.7440 133 27.9820 0 27.7440 144.005 27.7440 -0.947						27.7440 44 27.8363 0 27.7440 0.000 27.7440 0.000						27.7440 52 27.8753 0 27.7440 0.000 27.7440 0.000
27.7600 130 27.9980 0 27.7600 143.638 27.7600 -1.187						27.7600 47 27.8523 0 27.7600 0.000 27.7600 0.000						27.7600 55 27.8913 0 27.7600 0.000 27.7600 0.000
27.7760 142 28.0140 0 27.7760 143.272 27.7760 -0.106						27.7760 69 27.8683 0 27.7760 0.000 27.7760 0.000						27.7760 71 27.9073 0 27.7760 0.000 27.7760 0.000
27.7920 156 28.0300 0 27.7920 142.908 27.7920 1.042						27.7920 54 27.8843 0 27.7920 0.000 27.7920 0.000						27.7920 67 27.9233 0 27.7920 0.000 27.7920 0.000
27.8080 156 28.0460 1 27.8080 142.544 27.8080 1.070						27.8080 42 27.9003 0 27.8080 0.000 27.8080 0.000						27.8080 65 27.9393 0 27.8080 0.000 27.8080 0.000
27.8240 148 28.0620 0 27.8240 142.182 27.8240 0.475						27.8240 43 27.9163 0 27.8240 0.000 27.8240 0.000						27.8240 62 27.9553 0 27.8240 0.000 27.8240 0.000
27.8400 161 28.0780 0 27.8400 141.821 27.8400 1.502						27.8400 50 27.9323 0 27.8400 0.000 27.8400 0.000						27.8400 51 27.9713 0 27.8400 0.000 27.8400 0.000
27.8560 154 28.0940 0 27.8560 141.462 27.8560 1.004						27.8560 51 27.9483 0 27.8560 0.000 27.8560 0.000						27.8560 63 27.9873 0 27.8560 0.000 27.8560 0.000
27.8720 144 28.1100 0 27.8720 141.104 27.8720 0.240						27.8720 52 27.9643 0 27.8720 0.000 27.8720 0.000						27.8720 60 28.0033 0 27.8720 0.000 27.8720 0.000
27.8880 123 28.1260 0 27.8880 140.747 27.8880 -1.587						27.8880 55 27.9803 0 27.8880 0.000 27.8880 0.000						27.8880 73 28.0193 1 27.8880 0.000 27.8880 0.000
27.9040 127 28.1420 0 27.9040 140.391 27.9040 -1.179						27.9040 41 27.9963 0 27.9040 0.000 27.9040 0.000						27.9040 63 28.0353 0 27.9040 0.000 27.9040 0.000
27.9200 129 28.1580 0 27.9200 140.036 27.9200 -0.964						27.9200 56 28.0123 0 27.9200 0.000 27.9200 0.000						27.9200 60 28.0513 1 27.9200 0.000 27.9200 0.000
27.9360 135 28.1740 0 27.9360 139.683 27.9360 -0.400						27.9360 52 28.0283 0 27.9360 0.000 27.9360 0.000						27.9360 50 28.0673 1 27.9360 0.000 27.9360 0.000
27.9520 117 28.1900 0 27.9520 139.331 27.9520 -2.047						27.9520 48 28.0443 0 27.9520 0.000 27.9520 0.000						27.9520 45 28.0833 0 27.9520 0.000 27.9520 0.000
27.9680 141 28.2060 0 27.9680 138.981 27.9680 0.169						27.9680 54 28.0603 1 27.9680 0.000 27.9680 0.000						27.9680 59 28.0993 0 27.9680 0.000 27.9680 0.000
27.9840 139 28.2220 0 27.9840 138.631 27.9840 0.031						27.9840 42 28.0763 0 27.9840 0.000 27.9840 0.000						27.9840 58 28.1153 0 27.9840 0.000 27.9840 0.000
28.0000 143 28.2380 0 28.0000 138.283 28.0000 0.392						28.0000 51 28.0923 0 28.0000 0.000 28.0000 0.000						28.0000 53 28.1313 0 28.0000 0.000 28.0000 0.000
28.0160 143 28.2540 0 28.0160 137.936 28.0160 0.421						28.0160 54 28.1083 0 28.0160 0.000 28.0160 0.000						28.0160 60 28.1473 0 28.0160 0.000 28.0160 0.000
28.0320 145 28.2700 0 28.0320 137.590 28.0320 0.611						28.0320 46 28.1243 0 28.0320 0.000 28.0320 0.000						28.0320 61 28.1633 0 28.0320 0.000 28.0320 0.000
28.0480 125 28.2860 0 28.0480 137.246 28.0480 -1.087						28.0480 43 28.1403 0 28.0480 0.000 28.0480 0.000						28.0480 76 28.1793 0 28.0480 0.000 28.0480 0.000
28.0640 139 28.3020 0 28.0640 136.902 28.0640 0.177						28.0640 62 28.1563 0 28.0640 0.000 28.0640 0.000						28.0640 54 28.1953 0 28.0640 0.000 28.0640 0.000
28.0800 138 28.3180 0 28.0800 136.560 28.0800 0.122						28.0800 41 28.1723 0 28.0800 0.000 28.0800 0.000						28.0800 68 28.2113 0 28.0800 0.000 28.0800 0.000
28.0960 136 28.3340 0 28.0960 136.219 28.0960 -0.019						28.0960 47 28.1883 0 28.0960 0.000 28.0960 0.000						28.0960 50 28.2273 0 28.0960 0.000 28.0960 0.000
28.1120 132 28.3500 0 28.1120 135.879 28.1120 -0.335						28.1120 51 28.2043 0 28.1120 0.000 28.1120 0.000						28.1120 60 28.2433 0 28.1120 0.000 28.1120 0.000
28.1280 138 28.3660 0 28.1280 135.541 28.1280 0.208						28.1280 55 28.2203 0 28.1280 0.000 28.1280 0.000						28.1280 52 28.2593 0 28.1280 0.000 28.1280 0.000
28.1440 125 28.3820 0 28.1440 135.203 28.1440 -0.905						28.1440 51 28.2363 0 28.1440 0.000 28.1440 0.000						28.1440 55 28.2753 1 28.1440 0.000 28.1440 0.000
28.1600 149 28.3980 0 28.1600 134.867 28.1600 1.150						28.1600 40 28.2523 0 28.1600 0.000 28.1600 0.000						28.1600 60 28.2913 0 28.1600 0.000 28.1600 0.000
28.1760 142 28.4140 0 28.1760 134.532 28.1760 0.622						28.1760 36 28.2683 0 28.1760 0.000 28.1760 0.000						28.1760 61 28.3073 0 28.1760 0.000 28.1760 0.000
28.1920 139 28.4300 1 28.1920 134.199 28.1920 0.404						28.1920 46 28.2843 0 28.1920 0.000 28.1920 0.000						28.1920 55 28.3233 0 28.1920 0.000 28.1920 0.000
28.2080 120 28.4460 0 28.2080 133.866 28.2080 -1.255						28.2080 39 28.3003 0 28.2080 0.000 28.2080 0.000						28.2080 65 28.3393 0 28.2080 0.000 28.2080 0.000
28.2240 137 28.4620 0 28.2240 133.534 28.2240 0.294						28.2240 42 28.3163 0 28.2240 0.000 28.2240 0.000						28.2240 62 28.3553 0 28.2240 0.000 28.2240 0.000
28.2400 115 28.4780 0 28.2400 133.204 28.2400 -1.683						28.2400 50 28.3323 0 28.2400 0.000 28.2400 0.000						28.2400 52 28.3713 0 28.2400 0.000 28.2400 0.000
28.2560 135 28.4940 0 28.2560 132.875 28.2560 0.182						28.2560 50 28.3483 0 28.2560 0.000 28.2560 0.000						28.2560 58 28.3873 0 28.2560 0.000 28.2560 0.000
28.2720 136 28.5100 0 28.2720 132.547 28.2720 0.294						28.2720 53 28.3643 0 28.2720 0.000 28.2720 0.000						28.2720 55 28.4033 0 28.2720 0.000 28.2720 0.000
28.2880 129 28.5260 0 28.2880 132.220 28.2880 -0.281						28.2880 50 28.3803 0 28.2880 0.000 28.2880 0.000						28.2880 54 28.4193 0 28.2880 0.000 28.2880 0.000
28.3040 131 28.5420 0 28.3040 131.895 28.3040 -0.078						28.3040 44 28.3963 0 28.3040 0.000 28.3040 0.000						28.3040 60 28.4353 0 28.3040 0.000 28.3040 0.000
28.3200 131 28.5580 0 28.3200 131.570 28.3200 -0.049						28.3200 51 28.4123 0 28.3200 0.000 28.3200 0.000						28.3200 53 28.4513 0 28.3200 0.000 28.3200 0.000
28.3360 114 28.5740 0 28.3360 131.247 28.3360 -1.601						28.3360 54 28.4283 0 28.3360 0.000 28.3360 0.000						28.3360 57 28.4673 0 28.3360 0.000 28.3360 0.000
28.3520 140 28.5900 0 28.3520 130.925 28.3520 0.762						28.3520 39 28.4443 0 28.3520 0.000 28.3520 0.000						28.3520 67 28.4833 0 28.3520 0.000 28.3520 0.000
28.3680 103 28.6060 0 28.3680 130.604 28.3680 -2.694						28.3680 42 28.4603 0 28.3680 0.000 28.3680 0.000						28.3680 58 28.4993 1 28.3680 0.000 28.3680 0.000
28.3840 132 28.6220 0 28.3840 130.284 28.3840 0.148						28.3840 60 28.4763 0 28.3840 0.000 28.3840 0.000						28.3840 72 28.5153 0 28.3840 0.000 28.3840 0.000
28.4000 107 28.6380 0 28.4000 129.965 28.4000 -2.200						28.4000 38 28.4923 0 28.4000 0.000 28.4000 0.000						28.4000 58 28.5313 0 28.4000 0.000 28.4000 0.000
28.4160 127 28.6540 0 28.4160 129.647 28.4160 -0.233						28.4160 40 28.5083 0 28.4160 0.000 28.4160 0.000						28.4160 64 28.5473 0 28.4160 0.000 28.4160 0.000
28.4320 134 28.6700 0 28.4320 129.331 28.4320 0.400						28.4320 40 28.5243 0 28.4320 0.000 28.4320 0.000						28.4320 66 28.5633 0 28.4320 0.000 28.4320 0.000
28.4480 127 28.6860 0 28.4480 129.015 28.4480 -0.177						28.4480 38 28.5403 0 28.4480 0.000 28.4480 0.000						28.4480 53 28.5793 0 28.4480 0.000 28.4480 0.000
28.4640 117 28.7020 0 28.4640 128.701 28.4640 -1.073						28.4640 48 28.5563 0 28.4640 0.000 28.4640 0.000						28.4640 64 28.5953 0 28.4640 0.000 28.4640 0.000
28.4800 112 28.7180 0 28.4800 128.388 28.4800 -1.535						28.4800 52 28.5723 0 28.4800 0.000 28.4800 0.000						28.4800 46 28.6113 1 28.4800 0.000 28.4800 0.000
28.4960 128 28.7340 0 28.4960 128.076 28.4960 -0.007						28.4960 49 28.5883 0 28.4960 0.000 28.4960 0.000						28.4960 56 28.6273 0 28.4960 0.000 28.4960 0.000
28.5120 129 28.7500 0 28.5120 127.764 28.5120 0.108						28.5120 57 28.6043 0 28.5120 0.000 28.5120 0.000						28.5120 69 28.6433 0 28.5120 0.000 28.5120 0.000
28.5280 123 28.7660 0 28.5280 127.455 28.5280 -0.398						28.5280 47 28.6203 0 28.5280 0.000 28.5280 0.000						28.5280 51 28.6593 0 28.5280 0.000 28.5280 0.000
28.5440 126 28.7820 0 28.5440 127.146 28.5440 -0.101						28.5440 47 28.6363 0 28.5440 0.000 28.5440 0.000						28.5440 48 28.6753 0 28.5440 0.000 28.5440 0.000
28.5600 137 28.7980 0 28.5600 126.838 28.5600 0.862						28.5600 44 28.6523 0 28.5600 0.000 28.5600 0.000						28.5600 52 28.6913 0 28.5600 0.000 28.5600 0.000
28.5760 121 28.8140 0 28.5760 126.531 28.5760 -0.499						28.5760 40 28.6683 0 28.5760 0.000 28.5760 0.000						28.5760 52 28.7073 0 28.5760 0.000 28.5760 0.000
28.5920 132 28.8300 0 28.5920 126.226 28.5920 0.499						28.5920 54 28.6843 1 28.5920 0.000 28.5920 0.000						28.5920 50 28.7233 0 28.5920 0.000 28.5920 0.000
28.6080 133 28.8460 0 28.6080 125.921 28.6080 0.609						28.6080 39 28.7003 0 28.6080 0.000 28.6080 0.000						28.6080 48 28.7393 0 28.6080 0.000 28.6080 0.000
28.6240 121 28.8620 0 28.6240 125.618 28.6240 -0.416						28.6240 40 28.7163 0 28.6240 0.000 28.6240 0.000						28.6240 47 28.7553 0 28.6240 0.000 28.6240 0.000
28.6400 117 28.8780 0 28.6400 125.316 28.6400 -0.762						28.6400 45 28.7323 1 28.6400 0.000 28.6400 0.000						28.6400 56 28.7713 0 28.6400 0.000 28.6400 0.000
28.6560 112 28.8940 0 28.6560 125.014 28.6560 -1.219						28.6560 50 28.7483 0 28.6560 0.000 28.6560 0.000						28.6560 53 28.7873 0 28.6560 0.000 28.6560 0.000
28.6720 133 28.9100 0 28.6720 124.714 28.6720 0.713						28.6720 49 28.7643 0 28.6720 0.000 28.6720 0.000						28.6720 38 28.8033 0 28.6720 0.000 28.6720 0.000
28.6880 128 28.9260 0 28.6880 124.415 28.6880 0.314						28.6880 56 28.7803 0 28.6880 0.000 28.6880 0.000						28.6880 45 28.8193 0 28.6880 0.000 28.6880 0.000
28.7040 128 28.9420 0 28.7040 124.117 28.7040 0.341						28.7040 45 28.7963 0 28.7040 0.000 28.7040 0.000						28.7040 43 28.8353 2 28.7040 0.000 28.7040 0.000
28.7200 122 28.9580 1 28.7200 123.820 28.7200 -0.163						28.7200 46 28.8123 0 28.7200 0.000 28.7200 0.000						28.7200 63 28.8513 0 28.7200 0.000 28.7200 0.000
28.7360 126 28.9740 0 28.7360 123.524 28.7360 0.219						28.7360 45 28.8283 0 28.7360 0.000 28.7360 0.000						28.7360 50 28.8673 0 28.7360 0.000 28.7360 0.000
28.7520 123 28.9900 0 28.7520 123.229 28.7520 -0.020						28.7520 45 28.8443 0 28.7520 0.000 28.7520 0.000						28.7520 54 28.8833 0 28.7520 0.000 28.7520 0.000
28.7680 142 29.0060 1 28.7680 122.935 28.7680 1.589						28.7680 41 28.8603 0 28.7680 0.000 28.7680 0.000						28.7680 67 28.8993 0 28.7680 0.000 28.7680 0.000
28.7840 110 29.0220 0 28.7840 122.642 28.7840 -1.195						28.7840 46 28.8763 0 28.7840 0.000 28.7840 0.000						28.7840 55 28.9153 0 28.7840 0.000 28.7840 0.000
28.8000 111 29.0380 0 28.8000 122.350 28.8000 -1.068						28.8000 29 28.8923 0 28.8000 0.000 28.8000 0.000						28.8000 58 28.9313 0 28.8000 0.000 28.8000 0.000
28.8160 126 29.0540 0 28.8160 122.059 28.8160 0.348						28.8160 38 28.9083 0 28.8160 0.000 28.8160 0.000						28.8160 47 28.9473 0 28.8160 0.000 28.8160 0.000
28.8320 116 29.0700 0 28.8320 121.769 28.8320 -0.531						28.8320 41 28.9243 0 28.8320 0.000 28.8320 0.000						28.8320 46 28.9633 0 28.8320 0.000 28.8320 0.000
28.8480 107 29.0860 1 28.8480 121.481 28.8480 -1.387						28.8480 54 28.9403 0 28.8480 0.000 28.8480 0.000						28.8480 51 28.9793 0 28.8480 0.000 28.8480 0.000
28.8640 106 29.1020 0 28.8640 121.193 28.8640 -1.462						28.8640 43 28.9563 0 28.8640 0.000 28.8640 0.000						28.8640 49 28.9953 0 28.8640 0.000 28.8640 0.000
28.8800 120 29.1180 1 28.8800 120.906 28.8800 -0.082						28.8800 44 28.9723 0 28.8800 0.000 28.8800 0.000						28.8800 51 29.0113 0 28.8800 0.000 28.8800 0.000
28.8960 107 29.1340 0 28.8960 120.620 28.8960 -1.305						28.8960 49 28.9883 0 28.8960 0.000 28.8960 0.000						28.8960 52 29.0273 0 28.8960 0.000 28.8960 0.000
28.9120 122 29.1500 0 28.9120 120.336 28.9120 0.149						28.9120 47 29.0043 0 28.9120 0.000 28.9120 0.000						28.9120 61 29.0433 0 28.9120 0.000 28.9120 0.000
28.9280 115 29.1660 0 28.9280 120.052 28.9280 -0.467						28.9280 36 29.0203 1 28.9280 0.000 28.9280 0.000						28.9280 50 29.0593 0 28.9280 0.000 28.9280 0.000
28.9440 132 29.1820 0 28.9440 119.769 28.9440 1.057						28.9440 45 29.0363 0 28.9440 0.000 28.9440 0.000						28.9440 58 29.0753 0 28.9440 0.000 28.9440 0.000
28.9600 116 29.1980 0 28.9600 119.487 28.9600 -0.321						28.9600 35 29.0523 0 28.9600 0.000 28.9600 0.000						28.9600 43 29.0913 0 28.9600 0.000 28.9600 0.000
28.9760 119 29.2140 0 28.9760 119.207 28.9760 -0.019						28.9760 50 29.0683 0 28.9760 0.000 28.9760 0.000						28.9760 47 29.1073 1 28.9760 0.000 28.9760 0.000
28.9920 128 29.2300 0 28.9920 118.927 28.9920 0.796						28.9920 28 29.0843 0 28.9920 0.000 28.9920 0.000						28.9920 43 29.1233 0 28.9920 0.000 28.9920 0.000
29.0080 108 29.2460 0 29.0080 118.648 29.0080 -1.015						29.0080 47 29.1003 0 29.0080 0.000 29.0080 0.000						29.0080 48 29.1393 0 29.0080 0.000 29.0080 0.000
29.0240 129 29.2620 0 29.0240 118.370 29.0240 0.929						29.0240 59 29.1163 0 29.0240 0.000 29.0240 0.000						29.0240 47 29.1553 0 29.0240 0.000 29.0240 0.000
29.0400 105 29.2780 0 29.0400 118.094 29.0400 -1.266						29.0400 24 29.1323 0 29.0400 0.000 29.0400 0.000						29.0400 59 29.1713 0 29.0400 0.000 29.0400 0.000
29.0560 110 29.2940 0 29.0560 117.818 29.0560 -0.739						29.0560 41 29.1483 0 29.0560 0.000 29.0560 0.000						29.0560 39 29.1873 0 29.0560 0.000 29.0560 0.000
29.0720 102 29.3100 0 29.0720 117.543 29.0720 -1.524						29.0720 44 29.1643 0 29.0720 0.000 29.0720 0.000						29.0720 44 29.2033 0 29.0720 0.000 29.0720 0.000
29.0880 113 29.3260 0 29.0880 117.269 29.0880 -0.398						29.0880 37 29.1803 0 29.0880 0.000 29.0880 0.000						29.0880 50 29.2193 1 29.0880 0.000 29.0880 0.000
29.1040 103 29.3420 0 29.1040 116.996 29.1040 -1.366						29.1040 49 29.1963 0 29.1040 0.000 29.1040 0.000						29.1040 60 29.2353 0 29.1040 0.000 29.1040 0.000
29.1200 127 29.3580 0 29.1200 116.724 29.1200 0.905						29.1200 42 29.2123 0 29.1200 0.000 29.1200 0.000						29.1200 41 29.2513 0 29.1200 0.000 29.1200 0.000
29.1360 111 29.3740 0 29.1360 116.453 29.1360 -0.513						29.1360 35 29.2283 0 29.1360 0.000 29.1360 0.000						29.1360 43 29.2673 0 29.1360 0.000 29.1360 0.000
29.1520 107 29.3900 0 29.1520 116.183 29.1520 -0.880						29.1520 42 29.2443 0 29.1520 0.000 29.1520 0.000						29.1520 51 29.2833 0 29.1520 0.000 29.1520 0.000
29.1680 105 29.4060 0 29.1680 115.914 29.1680 -1.055						29.1680 38 29.2603 1 29.1680 0.000 29.1680 0.000						29.1680 52 29.2993 0 29.1680 0.000 29.1680 0.000
29.1840 112 29.4220 0 29.1840 115.646 29.1840 -0.341						29.1840 44 29.2763 0 29.1840 0.000 29.1840 0.000						29.1840 55 29.3153 0 29.1840 0.000 29.1840 0.000
29.2000 107 29.4380 0 29.2000 115.379 29.2000 -0.803						29.2000 50 29.2923 0 29.2000 0.000 29.2000 0.000						29.2000 46 29.3313 0 29.2000 0.000 29.2000 0.000
29.2160 106 29.4540 0 29.2160 115.113 29.2160 -0.877						29.2160 30 29.3083 0 29.2160 0.000 29.2160 0.000						29.2160 53 29.3473 0 29.2160 0.000 29.2160 0.000
29.2320 109 29.4700 0 29.2320 114.847 29.2320 -0.555						29.2320 43 29.3243 0 29.2320 0.000 29.2320 0.000						29.2320 48 29.3633 0 29.2320 0.000 29.2320 0.000
29.2480 121 29.4860 0 29.2480 114.583 29.2480 0.579						29.2480 48 29.3403 0 29.2480 0.000 29.2480 0.000						29.2480 39 29.3793 0 29.2480 0.000 29.2480 0.000
29.2640 115 29.5020 0 29.2640 114.320 29.2640 0.063						29.2640 35 29.3563 0 29.2640 0.000 29.2640 0.000						29.2640 43 29.3953 0 29.2640 0.000 29.2640 0.000
29.2800 117 29.5180 0 29.2800 114.057 29.2800 0.270						29.2800 40 29.3723 0 29.2800 0.000 29.2800 0.000						29.2800 37 29.4113 0 29.2800 0.000 29.2800 0.000
29.2960 116 29.5340 0 29.2960 113.795 29.2960 0.203						29.2960 41 29.3883 0 29.2960 0.000 29.2960 0.000						29.2960 53 29.4273 0 29.2960 0.000 29.2960 0.000
29.3120 102 29.5500 0 29.3120 113.535 29.3120 -1.131						29.3120 41 29.4043 0 29.3120 0.000 29.3120 0.000						29.3120 44 29.4433 0 29.3120 0.000 29.3120 0.000
29.3280 94 29.5660 0 29.3280 113.275 29.3280 -1.967						29.3280 36 29.4203 0 29.3280 0.000 29.3280 0.000						29.3280 43 29.4593 0 29.3280 0.000 29.3280 0.000
29.3440 112 29.5820 0 29.3440 113.016 29.3440 -0.095						29.3440 40 29.4363 1 29.3440 0.000 29.3440 0.000						29.3440 48 29.4753 0 29.3440 0.000 29.3440 0.000
29.3600 101 29.5980 0 29.3600 112.758 29.3600 -1.159						29.3600 35 29.4523 0 29.3600 0.000 29.3600 0.000						29.3600 44 29.4913 0 29.3600 0.000 29.3600 0.000
29.3760 135 29.6140 0 29.3760 112.501 29.3760 1.922						29.3760 34 29.4683 0 29.3760 0.000 29.3760 0.000						29.3760 48 29.5073 0 29.3760 0.000 29.3760 0.000
29.3920 93 29.6300 0 29.3920 112.245 29.3920 -1.974						29.3920 30 29.4843 0 29.3920 0.000 29.3920 0.000						29.3920 48 29.5233 0 29.3920 0.000 29.3920 0.000
29.4080 117 29.6460 0 29.4080 111.990 29.4080 0.459						29.4080 30 29.5003 0 29.4080 0.000 29.4080 0.000						29.4080 46 29.5393 0 29.4080 0.000 29.4080 0.000
29.4240 114 29.6620 0 29.4240 111.736 29.4240 0.210						29.4240 34 29.5163 0 29.4240 0.000 29.4240 0.000						29.4240 46 29.5553 0 29.4240 0.000 29.4240 0.000
29.4400 97 29.6780 0 29.4400 111.482 29.4400 -1.456						29.4400 35 29.5323 0 29.4400 0.000 29.4400 0.000						29.4400 52 29.5713 0 29.4400 0.000 29.4400 0.000
29.4560 98 29.6940 0 29.4560 111.230 29.4560 -1.323						29.4560 47 29.5483 0 29.4560 0.000 29.4560 0.000						29.4560 50 29.5873 0 29.4560 0.000 29.4560 0.000
29.4720 107 29.7100 0 29.4720 110.978 29.4720 -0.381						29.4720 30 29.5643 0 29.4720 0.000 29.4720 0.000						29.4720 43 29.6033 0 29.4720 0.000 29.4720 0.000
29.4880 95 29.7260 0 29.4880 110.727 29.4880 -1.597						29.4880 36 29.5803 0 29.4880 0.000 29.4880 0.000						29.4880 36 29.6193 0 29.4880 0.000 29.4880 0.000
29.5040 90 29.7420 0 29.5040 110.478 29.5040 -2.135						29.5040 46 29.5963 0 29.5040 0.000 29.5040 0.000						29.5040 34 29.6353 0 29.5040 0.000 29.5040 0.000
29.5200 104 29.7580 0 29.5200 110.229 29.5200 -0.605						29.5200 29 29.6123 0 29.5200 0.000 29.5200 0.000						29.5200 38 29.6513 0 29.5200 0.000 29.5200 0.000
29.5360 103 29.7740 0 29.5360 109.981 29.5360 -0.681						29.5360 35 29.6283 0 29.5360 0.000 29.5360 0.000						29.5360 42 29.6673 0 29.5360 0.000 29.5360 0.000
29.5520 116 29.7900 0 29.5520 109.733 29.5520 0.577						29.5520 30 29.6443 1 29.5520 0.000 29.5520 0.000						29.5520 36 29.6833 0 29.5520 0.000 29.5520 0.000
29.5680 105 29.8060 0 29.5680 109.487 29.5680 -0.434						29.5680 45 29.6603 0 29.5680 0.000 29.5680 0.000						29.5680 51 29.6993 0 29.5680 0.000 29.5680 0.000
29.5840 95 29.8220 1 29.5840 109.242 29.5840 -1.446						29.5840 37 29.6763 0 29.5840 0.000 29.5840 0.000						29.5840 47 29.7153 0 29.5840 0.000 29.5840 0.000
29.6000 120 29.8380 0 29.6000 108.997 29.6000 0.996						29.6000 30 29.6923 0 29.6000 0.000 29.6000 0.000						29.6000 35 29.7313 0 29.6000 0.000 29.6000 0.000
29.6160 111 29.8540 0 29.6160 108.753 29.6160 0.211						29.6160 32 29.7083 0 29.6160 0.000 29.6160 0.000						29.6160 54 29.7473 0 29.6160 0.000 29.6160 0.000
29.6320 91 29.8700 0 29.6320 108.510 29.6320 -1.816						29.6320 36 29.7243 0 29.6320 0.000 29.6320 0.000						29.6320 44 29.7633 0 29.6320 0.000 29.6320 0.000
29.6480 110 29.8860 1 29.6480 108.268 29.6480 0.164						29.6480 38 29.7403 0 29.6480 0.000 29.6480 0.000						29.6480 59 29.7793 0 29.6480 0.000 29.6480 0.000
29.6640 116 29.9020 0 29.6640 108.027 29.6640 0.734						29.6640 35 29.7563 0 29.6640 0.000 29.6640 0.000						29.6640 41 29.7953 1 29.6640 0.000 29.6640 0.000
29.6800 88 29.9180 0 29.6800 107.787 29.6800 -2.086						29.6800 32 29.7723 0 29.6800 0.000 29.6800 0.000						29.6800 43 29.8113 0 29.6800 0.000 29.6800 0.000
29.6960 82 29.9340 0 29.6960 107.547 29.6960 -2.787						29.6960 27 29.7883 0 29.6960 0.000 29.6960 0.000						29.6960 42 29.8273 0 29.6960 0.000 29.6960 0.000
29.7120 94 29.9500 0 29.7120 107.309 29.7120 -1.358						29.7120 39 29.8043 0 29.7120 0.000 29.7120 0.000						29.7120 38 29.8433 0 29.7120 0.000 29.7120 0.000
29.7280 90 29.9660 0 29.7280 107.071 29.7280 -1.780						29.7280 40 29.8203 0 29.7280 0.000 29.7280 0.000						29.7280 42 29.8593 0 29.7280 0.000 29.7280 0.000
29.7440 97 29.9820 0 29.7440 106.834 29.7440 -0.988						29.7440 35 29.8363 0 29.7440 0.000 29.7440 0.000						29.7440 46 29.8753 0 29.7440 0.000 29.7440 0.000
29.7600 101 29.9980 0 29.7600 106.598 29.7600 -0.552						29.7600 47 29.8523 0 29.7600 0.000 29.7600 0.000						29.7600 36 29.8913 0 29.7600 0.000 29.7600 0.000
29.7760 108 30.0140 0 29.7760 106.363 29.7760 0.156						29.7760 31 29.8683 0 29.7760 0.000 29.7760 0.000						29.7760 35 29.9073 0 29.7760 0.000 29.7760 0.000
29.7920 90 30.0300 0 29.7920 106.128 29.7920 -1.681						29.7920 33 29.8843 0 29.7920 0.000 29.7920 0.000						29.7920 35 29.9233 0 29.7920 0.000 29.7920 0.000
29.8080 100 30.0460 0 29.8080 105.895 29.8080 -0.584						29.8080 30 29.9003 0 29.8080 0.000 29.8080 0.000						29.8080 62 29.9393 0 29.8080 0.000 29.8080 0.000
29.8240 93 30.0620 0 29.8240 105.662 29.8240 -1.299						29.8240 32 29.9163 0 29.8240 0.000 29.8240 0.000						29.8240 37 29.9553 0 29.8240 0.000 29.8240 0.000
29.8400 122 30.0780 0 29.8400 105.430 29.8400 1.488						29.8400 33 29.9323 0 29.8400 0.000 29.8400 0.000						29.8400 39 29.9713 1 29.8400 0.000 29.8400 0.000
29.8560 106 30.0940 0 29.8560 105.199 29.8560 0.077						29.8560 24 29.9483 0 29.8560 0.000 29.8560 0.000						29.8560 43 29.9873 0 29.8560 0.000 29.8560 0.000
29.8720 101 30.1100 0 29.8720 104.968 29.8720 -0.391						29.8720 22 29.9643 0 29.8720 0.000 29.8720 0.000						29.8720 37 30.0033 0 29.8720 0.000 29.8720 0.000
29.8880 106 30.1260 0 29.8880 104.739 29.8880 0.121						29.8880 38 29.9803 0 29.8880 0.000 29.8880 0.000						29.8880 38 30.0193 0 29.8880 0.000 29.8880 0.000
29.9040 84 30.1420 0 29.9040 104.510 29.9040 -2.212						29.9040 43 29.9963 0 29.9040 0.000 29.9040 0.000						29.9040 48 30.0353 0 29.9040 0.000 29.9040 0.000
29.9200 81 30.1580 0 29.9200 104.282 29.9200 -2.556						29.9200 28 30.0123 0 29.9200 0.000 29.9200 0.000						29.9200 45 30.0513 0 29.9200 0.000 29.9200 0.000
29.9360 94 30.1740 0 29.9360 104.055 29.9360 -1.026						29.9360 30 30.0283 0 29.9360 0.000 29.9360 0.000						29.9360 43 30.0673 0 29.9360 0.000 29.9360 0.000
29.9520 93 30.1900 0 29.9520 103.829 29.9520 -1.111						29.9520 37 30.0443 0 29.9520 0.000 29.9520 0.000						29.9520 40 30.0833 0 29.9520 0.000 29.9520 0.000
29.9680 95 30.2060 0 29.9680 103.603 29.9680 -0.874						29.9680 28 30.0603 0 29.9680 0.000 29.9680 0.000						29.9680 47 30.0993 0 29.9680 0.000 29.9680 0.000
29.9840 89 30.2220 0 29.9840 103.379 29.9840 -1.507						29.9840 35 30.0763 0 29.9840 0.000 29.9840 0.000						29.9840 33 30.1153 0 29.9840 0.000 29.9840 0.000
30.0000 110 30.2380 0 30.0000 0.000 30.0000 0.000						30.0000 28 30.0923 0 30.0000 0.000 30.0000 0.000						30.0000 35 30.1313 1 30.0000 0.000 30.0000 0.000
30.0160 110 30.2540 0 30.0160 0.000 30.0160 0.000						30.0160 35 30.1083 0 30.0160 0.000 30.0160 0.000						30.0160 42 30.1473 0 30.0160 0.000 30.0160 0.000
30.0320 104 30.2700 0 30.0320 0.000 30.0320 0.000						30.0320 44 30.1243 0 30.0320 0.000 30.0320 0.000						30.0320 34 30.1633 0 30.0320 0.000 30.0320 0.000
30.0480 109 30.2860 0 30.0480 0.000 30.0480 0.000						30.0480 32 30.1403 0 30.0480 0.000 30.0480 0.000						30.0480 44 30.1793 0 30.0480 0.000 30.0480 0.000
30.0640 106 30.3020 0 30.0640 0.000 30.0640 0.000						30.0640 36 30.1563 0 30.0640 0.000 30.0640 0.000						30.0640 38 30.1953 0 30.0640 0.000 30.0640 0.000
30.0800 99 30.3180 0 30.0800 0.000 30.0800 0.000						30.0800 26 30.1723 0 30.0800 0.000 30.0800 0.000						30.0800 43 30.2113 0 30.0800 0.000 30.0800 0.000
30.0960 87 30.3340 0 30.0960 0.000 30.0960 0.000						30.0960 36 30.1883 0 30.0960 0.000 30.0960 0.000						30.0960 41 30.2273 0 30.0960 0.000 30.0960 0.000
30.1120 105 30.3500 0 30.1120 0.000 30.1120 0.000						30.1120 37 30.2043 0 30.1120 0.000 30.1120 0.000						30.1120 35 30.2433 0 30.1120 0.000 30.1120 0.000
30.1280 91 30.3660 0 30.1280 0.000 30.1280 0.000						30.1280 31 30.2203 0 30.1280 0.000 30.1280 0.000						30.1280 35 30.2593 0 30.1280 0.000 30.1280 0.000
30.1440 101 30.3820 0 30.1440 0.000 30.1440 0.000						30.1440 41 30.2363 0 30.1440 0.000 30.1440 0.000						30.1440 32 30.2753 0 30.1440 0.000 30.1440 0.000
30.1600 92 30.3980 1 30.1600 0.000 30.1600 0.000						30.1600 23 30.2523 0 30.1600 0.000 30.1600 0.000						30.1600 39 30.2913 0 30.1600 0.000 30.1600 0.000
30.1760 93 30.4140 0 30.1760 0.000 30.1760 0.000						30.1760 37 30.2683 0 30.1760 0.000 30.1760 0.000						30.1760 33 30.3073 0 30.1760 0.000 30.1760 0.000
30.1920 98 30.4300 0 30.1920 0.000 30.1920 0.000						30.1920 27 30.2843 0 30.1920 0.000 30.1920 0.000						30.1920 42 30.3233 0 30.1920 0.000 30.1920 0.000
30.2080 92 30.4460 0 30.2080 0.000 30.2080 0.000						30.2080 22 30.3003 0 30.2080 0.000 30.2080 0.000						30.2080 37 30.3393 0 30.2080 0.000 30.2080 0.000
30.2240 107 30.4620 0 30.2240 0.000 30.2240 0.000						30.2240 33 30.3163 0 30.2240 0.000 30.2240 0.000						30.2240 40 30.3553 0 30.2240 0.000 30.2240 0.000
30.2400 98 30.4780 0 30.2400 0.000 30.2400 0.000						30.2400 21 30.3323 0 30.2400 0.000 30.2400 0.000						30.2400 41 30.3713 0 30.2400 0.000 30.2400 0.000
30.2560 89 30.4940 0 30.2560 0.000 30.2560 0.000						30.2560 37 30.3483 0 30.2560 0.000 30.2560 0.000						30.2560 44 30.3873 0 30.2560 0.000 30.2560 0.000
30.2720 85 30.5100 0 30.2720 0.000 30.2720 0.000						30.2720 34 30.3643 0 30.2720 0.000 30.2720 0.000						30.2720 20 30.4033 0 30.2720 0.000 30.2720 0.000
30.2880 88 30.5260 0 30.2880 0.000 30.2880 0.000						30.2880 28 30.3803 0 30.2880 0.000 30.2880 0.000						30.2880 37 30.4193 0 30.2880 0.000 30.2880 0.000
30.3040 78 30.5420 0 30.3040 0.000 30.3040 0.000						30.3040 30 30.3963 0 30.3040 0.000 30.3040 0.000						30.3040 39 30.4353 0 30.3040 0.000 30.3040 0.000
30.3200 107 30.5580 1 30.3200 0.000 30.3200 0.000						30.3200 30 30.4123 0 30.3200 0.000 30.3200 0.000						30.3200 51 30.4513 1 30.3200 0.000 30.3200 0.000
30.3360 83 30.5740 1 30.3360 0.000 30.3360 0.000						30.3360 30 30.4283 0 30.3360 0.000 30.3360 0.000						30.3360 40 30.4673 0 30.3360 0.000 30.3360 0.000
30.3520 84 30.5900 0 30.3520 0.000 30.3520 0.000						30.3520 33 30.4443 0 30.3520 0.000 30.3520 0.000						30.3520 40 30.4833 0 30.3520 0.000 30.3520 0.000
30.3680 108 30.6060 0 30.3680 0.000 30.3680 0.000						30.3680 35 30.4603 0 30.3680 0.000 30.3680 0.000						30.3680 43 30.4993 0 30.3680 0.000 30.3680 0.000
30.3840 90 30.6220 0 30.3840 0.000 30.3840 0.000						30.3840 35 30.4763 1 30.3840 0.000 30.3840 0.000						30.3840 35 30.5153 1 30.3840 0.000 30.3840 0.000
30.4000 112 30.6380 0 30.4000 0.000 30.4000 0.000						30.4000 32 30.4923 0 30.4000 0.000 30.4000 0.000						30.4000 46 30.5313 0 30.4000 0.000 30.4000 0.000
30.4160 91 30.6540 0 30.4160 0.000 30.4160 0.000						30.4160 39 30.5083 0 30.4160 0.000 30.4160 0.000						30.4160 30 30.5473 0 30.4160 0.000 30.4160 0.000
30.4320 75 30.6700 0 30.4320 0.000 30.4320 0.000						30.4320 33 30.5243 0 30.4320 0.000 30.4320 0.000						30.4320 50 30.5633 0 30.4320 0.000 30.4320 0.000
30.4480 84 30.6860 0 30.4480 0.000 30.4480 0.000						30.4480 36 30.5403 0 30.4480 0.000 30.4480 0.000						30.4480 33 30.5793 0 30.4480 0.000 30.4480 0.000
30.4640 83 30.7020 0 30.4640 0.000 30.4640 0.000						30.4640 30 30.5563 0 30.4640 0.000 30.4640 0.000						30.4640 39 30.5953 0 30.4640 0.000 30.4640 0.000
30.4800 91 30.7180 0 30.4800 0.000 30.4800 0.000						30.4800 37 30.5723 0 30.4800 0.000 30.4800 0.000						30.4800 39 30.6113 0 30.4800 0.000 30.4800 0.000
30.4960 94 30.7340 0 30.4960 0.000 30.4960 0.000						30.4960 37 30.5883 0 30.4960 0.000 30.4960 0.000						30.4960 35 30.6273 0 30.4960 0.000 30.4960 0.000
30.5120 83 30.7500 1 30.5120 0.000 30.5120 0.000						30.5120 36 30.6043 0 30.5120 0.000 30.5120 0.000						30.5120 36 30.6433 0 30.5120 0.000 30.5120 0.000
30.5280 82 30.7660 0 30.5280 0.000 30.5280 0.000						30.5280 40 30.6203 0 30.5280 0.000 30.5280 0.000						30.5280 30 30.6593 0 30.5280 0.000 30.5280 0.000
30.5440 67 30.7820 0 30.5440 0.000 30.5440 0.000						30.5440 28 30.6363 0 30.5440 0.000 30.5440 0.000						30.5440 37 30.6753 0 30.5440 0.000 30.5440 0.000
30.5600 86 30.7980 0 30.5600 0.000 30.5600 0.000						30.5600 26 30.6523 0 30.5600 0.000 30.5600 0.000						30.5600 27 30.6913 0 30.5600 0.000 30.5600 0.000
30.5760 102 30.8140 0 30.5760 0.000 30.5760 0.000						30.5760 45 30.6683 0 30.5760 0.000 30.5760 0.000						30.5760 40 30.7073 0 30.5760 0.000 30.5760 0.000
30.5920 83 30.8300 0 30.5920 0.000 30.5920 0.000						30.5920 29 30.6843 0 30.5920 0.000 30.5920 0.000						30.5920 39 30.7233 0 30.5920 0.000 30.5920 0.000
30.6080 101 30.8460 0 30.6080 0.000 30.6080 0.000						30.6080 30 30.7003 0 30.6080 0.000 30.6080 0.000						30.6080 33 30.7393 0 30.6080 0.000 30.6080 0.000
30.6240 85 30.8620 0 30.6240 0.000 30.6240 0.000						30.6240 26 30.7163 0 30.6240 0.000 30.6240 0.000						30.6240 42 30.7553 0 30.6240 0.000 30.6240 0.000
30.6400 101 30.8780 0 30.6400 0.000 30.6400 0.000						30.6400 35 30.7323 0 30.6400 0.000 30.6400 0.000						30.6400 37 30.7713 0 30.6400 0.000 30.6400 0.000
30.6560 86 30.8940 1 30.6560 0.000 30.6560 0.000						30.6560 38 30.7483 0 30.6560 0.000 30.6560 0.000						30.6560 41 30.7873 0 30.6560 0.000 30.6560 0.000
30.6720 81 30.9100 0 30.6720 0.000 30.6720 0.000						30.6720 27 30.7643 0 30.6720 0.000 30.6720 0.000						30.6720 36 30.8033 0 30.6720 0.000 30.6720 0.000
30.6880 84 30.9260 0 30.6880 0.000 30.6880 0.000						30.6880 35 30.7803 0 30.6880 0.000 30.6880 0.000						30.6880 38 30.8193 0 30.6880 0.000 30.6880 0.000
30.7040 92 30.9420 0 30.7040 0.000 30.7040 0.000						30.7040 36 30.7963 0 30.7040 0.000 30.7040 0.000						30.7040 28 30.8353 0 30.7040 0.000 30.7040 0.000
30.7200 94 30.9580 0 30.7200 0.000 30.7200 0.000						30.7200 39 30.8123 0 30.7200 0.000 30.7200 0.000						30.7200 32 30.8513 0 30.7200 0.000 30.7200 0.000
30.7360 80 30.9740 0 30.7360 0.000 30.7360 0.000						30.7360 35 30.8283 0 30.7360 0.000 30.7360 0.000						30.7360 25 30.8673 0 30.7360 0.000 30.7360 0.000
30.7520 89 30.9900 0 30.7520 0.000 30.7520 0.000						30.7520 35 30.8443 0 30.7520 0.000 30.7520 0.000						30.7520 42 30.8833 0 30.7520 0.000 30.7520 0.000
30.7680 72 31.0060 2 30.7680 0.000 30.7680 0.000						30.7680 20 30.8603 0 30.7680 0.000 30.7680 0.000						30.7680 33 30.8993 0 30.7680 0.000 30.7680 0.000
30.7840 86 31.0220 0 30.7840 0.000 30.7840 0.000						30.7840 35 30.8763 0 30.7840 0.000 30.7840 0.000						30.7840 43 30.9153 0 30.7840 0.000 30.7840 0.000
30.8000 83 31.0380 0 30.8000 0.000 30.8000 0.000						30.8000 25 30.8923 0 30.8000 0.000 30.8000 0.000						30.8000 40 30.9313 0 30.8000 0.000 30.8000 0.000
30.8160 83 31.0540 0 30.8160 0.000 30.8160 0.000						30.8160 32 30.9083 0 30.8160 0.000 30.8160 0.000						30.8160 23 30.9473 0 30.8160 0.000 30.8160 0.000
30.8320 81 31.0700 0 30.8320 0.000 30.8320 0.000						30.8320 28 30.9243 0 30.8320 0.000 30.8320 0.000						30.8320 37 30.9633 0 30.8320 0.000 30.8320 0.000
30.8480 84 31.0860 0 30.8480 0.000 30.8480 0.000						30.8480 21 30.9403 0 30.8480 0.000 30.8480 0.000						30.8480 39 30.9793 0 30.8480 0.000 30.8480 0.000
30.8640 92 31.1020 0 30.8640 0.000 30.8640 0.000						30.8640 30 30.9563 0 30.8640 0.000 30.8640 0.000						30.8640 27 30.9953 0 30.8640 0.000 30.8640 0.000
30.8800 90 31.1180 0 30.8800 0.000 30.8800 0.000						30.8800 18 30.9723 1 30.8800 0.000 30.8800 0.000						30.8800 32 31.0113 0 30.8800 0.000 30.8800 0.000
30.8960 87 31.1340 0 30.8960 0.000 30.8960 0.000						30.8960 27 30.9883 0 30.8960 0.000 30.8960 0.000						30.8960 37 31.0273 0 30.8960 0.000 30.8960 0.000
30.9120 95 31.1500 0 30.9120 0.000 30.9120 0.000						30.9120 25 31.0043 0 30.9120 0.000 30.9120 0.000						30.9120 28 31.0433 0 30.9120 0.000 30.9120 0.000
30.9280 90 31.1660 0 30.9280 0.000 30.9280 0.000						30.9280 35 31.0203 0 30.9280 0.000 30.9280 0.000						30.9280 30 31.0593 0 30.9280 0.000 30.9280 0.000
30.9440 80 31.1820 0 30.9440 0.000 30.9440 0.000						30.9440 25 31.0363 0 30.9440 0.000 30.9440 0.000						30.9440 21 31.0753 0 30.9440 0.000 30.9440 0.000
30.9600 87 31.1980 0 30.9600 0.000 30.9600 0.000						30.9600 25 31.0523 0 30.9600 0.000 30.9600 0.000						30.9600 28 31.0913 0 30.9600 0.000 30.9600 0.000
30.9760 95 31.2140 0 30.9760 0.000 30.9760 0.000						30.9760 26 31.0683 0 30.9760 0.000 30.9760 0.000						30.9760 33 31.1073 0 30.9760 0.000 30.9760 0.000
30.9920 73 31.2300 0 30.9920 0.000 30.9920 0.000						30.9920 32 31.0843 0 30.9920 0.000 30.9920 0.000						30.9920 43 31.1233 0 30.9920 0.000 30.9920 0.000
31.0080 108 31.2460 0 31.0080 0.000 31.0080 0.000						31.0080 29 31.1003 0 31.0080 0.000 31.0080 0.000						31.0080 29 31.1393 1 31.0080 0.000 31.0080 0.000
31.0240 80 31.2620 0 31.0240 0.000 31.0240 0.000						31.0240 49 31.1163 0 31.0240 0.000 31.0240 0.000						31.0240 26 31.1553 1 31.0240 0.000 31.0240 0.000
31.0400 76 31.2780 0 31.0400 0.000 31.0400 0.000						31.0400 31 31.1323 0 31.0400 0.000 31.0400 0.000						31.0400 31 31.1713 0 31.0400 0.000 31.0400 0.000
31.0560 84 31.2940 1 31.0560 0.000 31.0560 0.000						31.0560 26 31.1483 0 31.0560 0.000 31.0560 0.000						31.0560 28 31.1873 1 31.0560 0.000 31.0560 0.000
31.0720 92 31.3100 0 31.0720 0.000 31.0720 0.000						31.0720 24 31.1643 0 31.0720 0.000 31.0720 0.000						31.0720 33 31.2033 0 31.0720 0.000 31.0720 0.000
31.0880 79 31.3260 0 31.0880 0.000 31.0880 0.000						31.0880 26 31.1803 0 31.0880 0.000 31.0880 0.000						31.0880 30 31.2193 0 31.0880 0.000 31.0880 0.000
31.1040 73 31.3420 0 31.1040 0.000 31.1040 0.000						31.1040 31 31.1963 0 31.1040 0.000 31.1040 0.000						31.1040 28 31.2353 0 31.1040 0.000 31.1040 0.000
31.1200 73 31.3580 0 31.1200 0.000 31.1200 0.000						31.1200 23 31.2123 0 31.1200 0.000 31.1200 0.000						31.1200 36 31.2513 0 31.1200 0.000 31.1200 0.000
31.1360 78 31.3740 0 31.1360 0.000 31.1360 0.000						31.1360 35 31.2283 0 31.1360 0.000 31.1360 0.000						31.1360 33 31.2673 0 31.1360 0.000 31.1360 0.000
31.1520 75 31.3900 0 31.1520 0.000 31.1520 0.000						31.1520 18 31.2443 0 31.1520 0.000 31.1520 0.000						31.1520 32 31.2833 0 31.1520 0.000 31.1520 0.000
31.1680 76 31.4060 0 31.1680 0.000 31.1680 0.000						31.1680 29 31.2603 0 31.1680 0.000 31.1680 0.000						31.1680 29 31.2993 0 31.1680 0.000 31.1680 0.000
31.1840 87 31.4220 0 31.1840 0.000 31.1840 0.000						31.1840 25 31.2763 0 31.1840 0.000 31.1840 0.000						31.1840 35 31.3153 0 31.1840 0.000 31.1840 0.000
31.2000 83 31.4380 0 31.2000 0.000 31.2000 0.000						31.2000 18 31.2923 0 31.2000 0.000 31.2000 0.000						31.2000 39 31.3313 0 31.2000 0.000 31.2000 0.000
31.2160 84 31.4540 0 31.2160 0.000 31.2160 0.000						31.2160 27 31.3083 0 31.2160 0.000 31.2160 0.000						31.2160 33 31.3473 0 31.2160 0.000 31.2160 0.000
31.2320 84 31.4700 0 31.2320 0.000 31.2320 0.000						31.2320 28 31.3243 0 31.2320 0.000 31.2320 0.000						31.2320 27 31.3633 0 31.2320 0.000 31.2320 0.000
31.2480 82 31.4860 0 31.2480 0.000 31.2480 0.000						31.2480 33 31.3403 0 31.2480 0.000 31.2480 0.000						31.2480 27 31.3793 0 31.2480 0.000 31.2480 0.000
31.2640 58 31.5020 0 31.2640 0.000 31.2640 0.000						31.2640 24 31.3563 0 31.2640 0.000 31.2640 0.000						31.2640 25 31.3953 0 31.2640 0.000 31.2640 0.000
31.2800 92 31.5180 0 31.2800 0.000 31.2800 0.000						31.2800 30 31.3723 0 31.2800 0.000 31.2800 0.000						31.2800 28 31.4113 0 31.2800 0.000 31.2800 0.000
31.2960 71 31.5340 0 31.2960 0.000 31.2960 0.000						31.2960 22 31.3883 0 31.2960 0.000 31.2960 0.000						31.2960 39 31.4273 0 31.2960 0.000 31.2960 0.000
31.3120 94 31.5500 0 31.3120 0.000 31.3120 0.000						31.3120 30 31.4043 0 31.3120 0.000 31.3120 0.000						31.3120 26 31.4433 0 31.3120 0.000 31.3120 0.000
31.3280 80 31.5660 0 31.3280 0.000 31.3280 0.000						31.3280 36 31.4203 0 31.3280 0.000 31.3280 0.000						31.3280 31 31.4593 0 31.3280 0.000 31.3280 0.000
31.3440 78 31.5820 0 31.3440 0.000 31.3440 0.000						31.3440 36 31.4363 0 31.3440 0.000 31.3440 0.000						31.3440 36 31.4753 0 31.3440 0.000 31.3440 0.000
31.3600 80 31.5980 0 31.3600 0.000 31.3600 0.000						31.3600 18 31.4523 0 31.3600 0.000 31.3600 0.000						31.3600 36 31.4913 0 31.3600 0.000 31.3600 0.000
31.3760 73 31.6140 0 31.3760 0.000 31.3760 0.000						31.3760 28 31.4683 0 31.3760 0.000 31.3760 0.000						31.3760 26 31.5073 0 31.3760 0.000 31.3760 0.000
31.3920 78 31.6300 0 31.3920 0.000 31.3920 0.000						31.3920 22 31.4843 0 31.3920 0.000 31.3920 0.000						31.3920 38 31.5233 1 31.3920 0.000 31.3920 0.000
31.4080 67 31.6460 0 31.4080 0.000 31.4080 0.000						31.4080 21 31.5003 0 31.4080 0.000 31.4080 0.000						31.4080 39 31.5393 1 31.4080 0.000 31.4080 0.000
31.4240 69 31.6620 0 31.4240 0.000 31.4240 0.000						31.4240 27 31.5163 0 31.4240 0.000 31.4240 0.000						31.4240 29 31.5553 0 31.4240 0.000 31.4240 0.000
31.4400 69 31.6780 0 31.4400 0.000 31.4400 0.000						31.4400 32 31.5323 0 31.4400 0.000 31.4400 0.000						31.4400 33 31.5713 0 31.4400 0.000 31.4400 0.000
31.4560 75 31.6940 0 31.4560 0.000 31.4560 0.000						31.4560 25 31.5483 0 31.4560 0.000 31.4560 0.000						31.4560 23 31.5873 0 31.4560 0.000 31.4560 0.000
31.4720 83 31.7100 0 31.4720 0.000 31.4720 0.000						31.4720 30 31.5643 0 31.4720 0.000 31.4720 0.000						31.4720 27 31.6033 0 31.4720 0.000 31.4720 0.000
31.4880 72 31.7260 0 31.4880 0.000 31.4880 0.000						31.4880 22 31.5803 0 31.4880 0.000 31.4880 0.000						31.4880 34 31.6193 0 31.4880 0.000 31.4880 0.000
31.5040 65 31.7420 0 31.5040 0.000 31.5040 0.000						31.5040 24 31.5963 0 31.5040 0.000 31.5040 0.000						31.5040 35 31.6353 0 31.5040 0.000 31.5040 0.000
31.5200 89 31.7580 0 31.5200 0.000 31.5200 0.000						31.5200 22 31.6123 0 31.5200 0.000 31.5200 0.000						31.5200 34 31.6513 0 31.5200 0.000 31.5200 0.000
31.5360 67 31.7740 1 31.5360 0.000 31.5360 0.000						31.5360 28 31.6283 0 31.5360 0.000 31.5360 0.000						31.5360 28 31.6673 0 31.5360 0.000 31.5360 0.000
31.5520 71 31.7900 0 31.5520 0.000 31.5520 0.000						31.5520 19 31.6443 0 31.5520 0.000 31.5520 0.000						31.5520 45 31.6833 0 31.5520 0.000 31.5520 0.000
31.5680 76 31.8060 0 31.5680 0.000 31.5680 0.000						31.5680 26 31.6603 0 31.5680 0.000 31.5680 0.000						31.5680 31 31.6993 0 31.5680 0.000 31.5680 0.000
31.5840 66 31.8220 0 31.5840 0.000 31.5840 0.000						31.5840 28 31.6763 0 31.5840 0.000 31.5840 0.000						31.5840 33 31.7153 0 31.5840 0.000 31.5840 0.000
31.6000 75 31.8380 0 31.6000 0.000 31.6000 0.000						31.6000 20 31.6923 0 31.6000 0.000 31.6000 0.000						31.6000 23 31.7313 0 31.6000 0.000 31.6000 0.000
31.6160 76 31.8540 0 31.6160 0.000 31.6160 0.000						31.6160 23 31.7083 0 31.6160 0.000 31.6160 0.000						31.6160 31 31.7473 0 31.6160 0.000 31.6160 0.000
31.6320 86 31.8700 0 31.6320 0.000 31.6320 0.000						31.6320 18 31.7243 0 31.6320 0.000 31.6320 0.000						31.6320 29 31.7633 0 31.6320 0.000 31.6320 0.000
31.6480 80 31.8860 0 31.6480 0.000 31.6480 0.000						31.6480 20 31.7403 0 31.6480 0.000 31.6480 0.000						31.6480 31 31.7793 1 31.6480 0.000 31.6480 0.000
31.6640 71 31.9020 0 31.6640 0.000 31.6640 0.000						31.6640 23 31.7563 0 31.6640 0.000 31.6640 0.000						31.6640 29 31.7953 0 31.6640 0.000 31.6640 0.000
31.6800 72 31.9180 0 31.6800 0.000 31.6800 0.000						31.6800 30 31.7723 0 31.6800 0.000 31.6800 0.000						31.6800 27 31.8113 0 31.6800 0.000 31.6800 0.000
31.6960 78 31.9340 0 31.6960 0.000 31.6960 0.000						31.6960 24 31.7883 0 31.6960 0.000 31.6960 0.000						31.6960 22 31.8273 0 31.6960 0.000 31.6960 0.000
31.7120 66 31.9500 0 31.7120 0.000 31.7120 0.000						31.7120 32 31.8043 0 31.7120 0.000 31.7120 0.000						31.7120 32 31.8433 0 31.7120 0.000 31.7120 0.000
31.7280 77 31.9660 0 31.7280 0.000 31.7280 0.000						31.7280 23 31.8203 0 31.7280 0.000 31.7280 0.000						31.7280 37 31.8593 0 31.7280 0.000 31.7280 0.000
31.7440 82 31.9820 0 31.7440 0.000 31.7440 0.000						31.7440 22 31.8363 0 31.7440 0.000 31.7440 0.000						31.7440 32 31.8753 0 31.7440 0.000 31.7440 0.000
31.7600 73 31.9980 0 31.7600 0.000 31.7600 0.000						31.7600 26 31.8523 0 31.7600 0.000 31.7600 0.000						31.7600 26 31.8913 0 31.7600 0.000 31.7600 0.000
31.7760 71 32.0140 0 31.7760 0.000 31.7760 0.000						31.7760 18 31.8683 0 31.7760 0.000 31.7760 0.000						31.7760 18 31.9073 0 31.7760 0.000 31.7760 0.000
31.7920 86 32.0300 0 31.7920 0.000 31.7920 0.000						31.7920 31 31.8843 0 31.7920 0.000 31.7920 0.000						31.7920 21 31.9233 0 31.7920 0.000 31.7920 0.000
31.8080 83 32.0460 0 31.8080 0.000 31.8080 0.000						31.8080 24 31.9003 0 31.8080 0.000 31.8080 0.000						31.8080 41 31.9393 0 31.8080 0.000 31.8080 0.000
31.8240 58 32.0620 0 31.8240 0.000 31.8240 0.000						31.8240 19 31.9163 0 31.8240 0.000 31.8240 0.000						31.8240 30 31.9553 0 31.8240 0.000 31.8240 0.000
31.8400 56 32.0780 0 31.8400 0.000 31.8400 0.000						31.8400 27 31.9323 0 31.8400 0.000 31.8400 0.000						31.8400 38 31.9713 0 31.8400 0.000 31.8400 0.000
31.8560 69 32.0940 0 31.8560 0.000 31.8560 0.000						31.8560 25 31.9483 1 31.8560 0.000 31.8560 0.000						31.8560 26 31.9873 0 31.8560 0.000 31.8560 0.000
31.8720 65 32.1100 0 31.8720 0.000 31.8720 0.000						31.8720 19 31.9643 0 31.8720 0.000 31.8720 0.000						31.8720 35 32.0033 0 31.8720 0.000 31.8720 0.000
31.8880 82 32.1260 0 31.8880 0.000 31.8880 0.000						31.8880 20 31.9803 0 31.8880 0.000 31.8880 0.000						31.8880 20 32.0193 0 31.8880 0.000 31.8880 0.000
31.9040 61 32.1420 1 31.9040 0.000 31.9040 0.000						31.9040 25 31.9963 0 31.9040 0.000 31.9040 0.000						31.9040 28 32.0353 0 31.9040 0.000 31.9040 0.000
31.9200 85 32.1580 0 31.9200 0.000 31.9200 0.000						31.9200 29 32.0123 0 31.9200 0.000 31.9200 0.000						31.9200 20 32.0513 0 31.9200 0.000 31.9200 0.000
[truncated: 5,281 more rows]

## Sheet: Fig3
Lifetime and Radiative Lifetime
PL Peak [eV]	PLQY [%]	Lifetime [ns]	Radiative Lifetime [ns]
2.56168	100	3.38627	3.38627
2.55114	99.3	3.45826	3.48264
2.53031	96.1	3.28694	3.42033
2.52002	96.6	3.18781	3.30001
2.4997	91.6	3.26401	3.56333
2.48467	92.7	3.29559	3.55511
2.4797	92	3.29412	3.58057
2.4797	89.2	3.16683	3.55026
2.4797	93.5	3.14741	3.36621
2.4797	91.7	3.14662	3.43143
2.47475	89.2	3.34238	3.74706
2.47475	100	3.2883	3.2883
2.47475	100	3.31189	3.31189
2.46982	93.8	3.48436	3.71467
2.46491	99.8	3.50215	3.50917
2.46491	99.3	3.49877	3.52343
2.46491	94.7	3.46656	3.66057
2.46002	98.7	3.60489	3.65237
2.45515	96.1	3.72778	3.87906
2.4503	96.8	3.704	3.82645
2.4503	100	3.8292	3.8292
2.4503	90	3.889	4.32111
2.44547	89.9	4.0776	4.53571
2.4503	100	3.9995	3.9995
2.65493	94.3	4.5289	4.80265
2.65493	95.7	4.2627	4.45423
2.6268	100	4.0781	4.0781
2.64361	90	4.1523	4.61367
2.58842	100	3.738	3.738
2.59383	100	3.7961	3.7961
2.57765	100	3.7778	3.7778
2.56168	97.2	3.31441	3.40989
2.53548	93.8	3.10841	3.31387
2.47475	93.5	3.21643	3.44003

## Sheet: Fig4
4A																						4B	Anisotropy order parameter from molecular dynamics of CsPbBr3 at 300K
Calc. data			Calc. data			Calc. data			Calc. data			Calc. data			Calc. data			Calc. data				Size (nm)	xi_60	errbar_60	xi_160	errbar_160	xi_avg	errbar_xi_avg
2θ, °	Intensity, cps norm		2θ, °	Intensity, cps norm		2θ, °	Intensity, cps norm		2θ, °	Intensity, cps norm		2θ, °	Intensity, cps norm		2θ, °	Intensity, cps norm		2θ, °	Intensity, cps norm			1.27	0.030477	0.038055	0.004768	0.007999	0.017623	0.020296
10	1.29982e-10		10	0.00259738		10	0.0169167		10	0.0153347		10	0.0124411		10	0.00150767		10	0.00649199			1.87	0.173587	0.069153	0.017671	0.014153	0.095629	0.038055
10.02	1.30213e-10		10.02	0.00260627		10.02	0.0169769		10.02	0.0153893		10.02	0.0124853		10.02	0.00150944		10.02	0.00651578			2.53	0.351411	0.061103	0.049548	0.018252	0.200479	0.034875
10.04	1.30445e-10		10.04	0.0026152		10.04	0.0170374		10.04	0.0154443		10.04	0.0125298		10.04	0.00151121		10.04	0.00653976			3.22	0.456745	0.047987	0.077736	0.017582	0.267241	0.028324
10.06	1.30677e-10		10.06	0.00262418		10.06	0.0170982		10.06	0.0154995		10.06	0.0125744		10.06	0.00151299		10.06	0.00656395			4.01	0.52902	0.037719	0.108923	0.016221	0.318972	0.023128
10.08	1.3091e-10		10.08	0.00263321		10.08	0.0171593		10.08	0.015555		10.08	0.0126194		10.08	0.00151478		10.08	0.00658833			4.67	0.57406	0.029878	0.120977	0.013851	0.347518	0.018666
10.1	1.31144e-10		10.1	0.00264228		10.1	0.0172207		10.1	0.0156107		10.1	0.0126645		10.1	0.00151658		10.1	0.00661292			5.19	0.607513	0.023884	0.132167	0.01202	0.36984	0.015303
10.12	1.31378e-10		10.12	0.00265139		10.12	0.0172825		10.12	0.0156668		10.12	0.01271		10.12	0.00151839		10.12	0.00663772			5.79	0.628362	0.02078	0.143904	0.010579	0.386133	0.013432
10.14	1.31613e-10		10.14	0.00266056		10.14	0.0173446		10.14	0.0157232		10.14	0.0127556		10.14	0.0015202		10.14	0.00666272
10.16	1.31848e-10		10.16	0.00266977		10.16	0.0174071		10.16	0.0157799		10.16	0.0128015		10.16	0.00152202		10.16	0.00668793
10.18	1.32085e-10		10.18	0.00267903		10.18	0.0174699		10.18	0.0158369		10.18	0.0128477		10.18	0.00152385		10.18	0.00671336
10.2	1.32321e-10		10.2	0.00268834		10.2	0.017533		10.2	0.0158943		10.2	0.0128941		10.2	0.00152569		10.2	0.00673901
10.22	1.32559e-10		10.22	0.00269769		10.22	0.0175965		10.22	0.0159519		10.22	0.0129407		10.22	0.00152754		10.22	0.00676487
10.24	1.32797e-10		10.24	0.0027071		10.24	0.0176603		10.24	0.0160098		10.24	0.0129876		10.24	0.0015294		10.24	0.00679096
10.26	1.33036e-10		10.26	0.00271655		10.26	0.0177244		10.26	0.0160681		10.26	0.0130348		10.26	0.00153127		10.26	0.00681728
10.28	1.33275e-10		10.28	0.00272606		10.28	0.0177889		10.28	0.0161267		10.28	0.0130822		10.28	0.00153315		10.28	0.00684383
10.3	1.33515e-10		10.3	0.00273561		10.3	0.0178538		10.3	0.0161855		10.3	0.0131299		10.3	0.00153504		10.3	0.00687061
10.32	1.33756e-10		10.32	0.00274522		10.32	0.017919		10.32	0.0162448		10.32	0.0131778		10.32	0.00153694		10.32	0.00689762
10.34	1.33998e-10		10.34	0.00275487		10.34	0.0179846		10.34	0.0163043		10.34	0.013226		10.34	0.00153885		10.34	0.00692488
10.36	1.3424e-10		10.36	0.00276458		10.36	0.0180505		10.36	0.0163642		10.36	0.0132745		10.36	0.00154078		10.36	0.00695239
10.38	1.34483e-10		10.38	0.00277434		10.38	0.0181168		10.38	0.0164243		10.38	0.0133233		10.38	0.00154272		10.38	0.00698013
10.4	1.34726e-10		10.4	0.00278415		10.4	0.0181835		10.4	0.0164849		10.4	0.0133723		10.4	0.00154466		10.4	0.00700813
10.42	1.3497e-10		10.42	0.00279401		10.42	0.0182505		10.42	0.0165457		10.42	0.0134215		10.42	0.00154663		10.42	0.00703639
10.44	1.35215e-10		10.44	0.00280393		10.44	0.0183179		10.44	0.0166069		10.44	0.0134711		10.44	0.00154861		10.44	0.0070649
10.46	1.35461e-10		10.46	0.0028139		10.46	0.0183857		10.46	0.0166685		10.46	0.0135209		10.46	0.0015506		10.46	0.00709367
10.48	1.35707e-10		10.48	0.00282392		10.48	0.0184539		10.48	0.0167303		10.48	0.013571		10.48	0.00155261		10.48	0.00712271
10.5	1.35954e-10		10.5	0.002834		10.5	0.0185224		10.5	0.0167926		10.5	0.0136214		10.5	0.00155463		10.5	0.00715202
10.52	1.36201e-10		10.52	0.00284413		10.52	0.0185913		10.52	0.0168551		10.52	0.013672		10.52	0.00155667		10.52	0.00718161
10.54	1.3645e-10		10.54	0.00285433		10.54	0.0186606		10.54	0.016918		10.54	0.013723		10.54	0.00155872		10.54	0.00721147
10.56	1.36698e-10		10.56	0.00286457		10.56	0.0187303		10.56	0.0169813		10.56	0.0137742		10.56	0.0015608		10.56	0.00724162
10.58	1.36948e-10		10.58	0.00287487		10.58	0.0188004		10.58	0.0170449		10.58	0.0138257		10.58	0.00156289		10.58	0.00727205
10.6	1.37198e-10		10.6	0.00288524		10.6	0.0188709		10.6	0.0171089		10.6	0.0138775		10.6	0.001565		10.6	0.00730278
10.62	1.37449e-10		10.62	0.00289566		10.62	0.0189417		10.62	0.0171732		10.62	0.0139296		10.62	0.00156713		10.62	0.0073338
10.64	1.37701e-10		10.64	0.00290613		10.64	0.019013		10.64	0.0172379		10.64	0.013982		10.64	0.00156929		10.64	0.00736512
10.66	1.37954e-10		10.66	0.00291667		10.66	0.0190847		10.66	0.017303		10.66	0.0140347		10.66	0.00157146		10.66	0.00739674
10.68	1.38207e-10		10.68	0.00292727		10.68	0.0191568		10.68	0.0173684		10.68	0.0140877		10.68	0.00157366		10.68	0.00742868
10.7	1.38461e-10		10.7	0.00293793		10.7	0.0192292		10.7	0.0174342		10.7	0.0141409		10.7	0.00157588		10.7	0.00746094
10.72	1.38715e-10		10.72	0.00294866		10.72	0.0193021		10.72	0.0175004		10.72	0.0141945		10.72	0.00157812		10.72	0.00749351
10.74	1.38971e-10		10.74	0.00295944		10.74	0.0193754		10.74	0.017567		10.74	0.0142484		10.74	0.00158039		10.74	0.0075264
10.76	1.39227e-10		10.76	0.0029703		10.76	0.0194492		10.76	0.0176339		10.76	0.0143026		10.76	0.00158269		10.76	0.00755963
10.78	1.39483e-10		10.78	0.00298121		10.78	0.0195233		10.78	0.0177012		10.78	0.0143571		10.78	0.00158501		10.78	0.00759319
10.8	1.39741e-10		10.8	0.0029922		10.8	0.0195979		10.8	0.0177689		10.8	0.0144119		10.8	0.00158737		10.8	0.0076271
10.82	1.39999e-10		10.82	0.00300325		10.82	0.0196729		10.82	0.017837		10.82	0.0144671		10.82	0.00158975		10.82	0.00766135
10.84	1.40258e-10		10.84	0.00301438		10.84	0.0197483		10.84	0.0179055		10.84	0.0145225		10.84	0.00159217		10.84	0.00769595
10.86	1.40518e-10		10.86	0.00302557		10.86	0.0198242		10.86	0.0179743		10.86	0.0145783		10.86	0.00159461		10.86	0.00773091
10.88	1.40778e-10		10.88	0.00303684		10.88	0.0199005		10.88	0.0180436		10.88	0.0146344		10.88	0.0015971		10.88	0.00776624
10.9	1.41039e-10		10.9	0.00304819		10.9	0.0199773		10.9	0.0181133		10.9	0.0146908		10.9	0.00159962		10.9	0.00780194
10.92	1.41301e-10		10.92	0.00305961		10.92	0.0200545		10.92	0.0181833		10.92	0.0147475		10.92	0.00160217		10.92	0.00783801
10.94	1.41564e-10		10.94	0.00307111		10.94	0.0201321		10.94	0.0182538		10.94	0.0148046		10.94	0.00160477		10.94	0.00787446
10.96	1.41827e-10		10.96	0.0030827		10.96	0.0202102		10.96	0.0183247		10.96	0.014862		10.96	0.0016074		10.96	0.0079113
10.98	1.42091e-10		10.98	0.00309437		10.98	0.0202887		10.98	0.018396		10.98	0.0149198		10.98	0.00161008		10.98	0.00794855
11	1.42356e-10		11	0.00310613		11	0.0203677		11	0.0184677		11	0.0149778		11	0.0016128		11	0.00798619
11.02	1.42622e-10		11.02	0.00311798		11.02	0.0204472		11.02	0.0185398		11.02	0.0150362		11.02	0.00161557		11.02	0.00802424
11.04	1.42888e-10		11.04	0.00312992		11.04	0.0205271		11.04	0.0186124		11.04	0.015095		11.04	0.00161838		11.04	0.00806271
11.06	1.43155e-10		11.06	0.00314197		11.06	0.0206075		11.06	0.0186853		11.06	0.0151541		11.06	0.00162124		11.06	0.0081016
11.08	1.43423e-10		11.08	0.00315412		11.08	0.0206884		11.08	0.0187587		11.08	0.0152135		11.08	0.00162416		11.08	0.00814093
11.1	1.43692e-10		11.1	0.00316638		11.1	0.0207698		11.1	0.0188326		11.1	0.0152733		11.1	0.00162713		11.1	0.00818069
11.12	1.43961e-10		11.12	0.00317876		11.12	0.0208516		11.12	0.0189069		11.12	0.0153335		11.12	0.00163016		11.12	0.0082209
11.14	1.44232e-10		11.14	0.00319125		11.14	0.0209339		11.14	0.0189816		11.14	0.015394		11.14	0.00163325		11.14	0.00828759
11.16	1.44503e-10		11.16	0.00320387		11.16	0.0210167		11.16	0.0190567		11.16	0.0154549		11.16	0.0016364		11.16	0.00832879
11.18	1.44774e-10		11.18	0.00321663		11.18	0.0211		11.18	0.0191323		11.18	0.0155161		11.18	0.00163961		11.18	0.00837045
11.2	1.45047e-10		11.2	0.00322953		11.2	0.0211838		11.2	0.0192084		11.2	0.0155777		11.2	0.00164289		11.2	0.00842552
11.22	1.4532e-10		11.22	0.00324258		11.22	0.0212681		11.22	0.0192849		11.22	0.0156396		11.22	0.00164624		11.22	0.00846819
11.24	1.45594e-10		11.24	0.0032558		11.24	0.0213528		11.24	0.0193618		11.24	0.0157019		11.24	0.00164966		11.24	0.00851136
11.26	1.45869e-10		11.26	0.00326918		11.26	0.0214381		11.26	0.0194392		11.26	0.0157646		11.26	0.00165316		11.26	0.00855503
11.28	1.46145e-10		11.28	0.00328276		11.28	0.0215239		11.28	0.0195171		11.28	0.0158277		11.28	0.00165674		11.28	0.00859922
11.3	1.46422e-10		11.3	0.00329653		11.3	0.0216103		11.3	0.0195954		11.3	0.0158912		11.3	0.0016604		11.3	0.00864393
11.32	1.46699e-10		11.32	0.00331051		11.32	0.0216971		11.32	0.0196743		11.32	0.015955		11.32	0.00166414		11.32	0.00868918
11.34	1.46977e-10		11.34	0.00332472		11.34	0.0217845		11.34	0.0197536		11.34	0.0160192		11.34	0.00166798		11.34	0.00873497
11.36	1.47256e-10		11.36	0.00333918		11.36	0.0218724		11.36	0.0198333		11.36	0.0160838		11.36	0.00167191		11.36	0.00878132
11.38	1.47536e-10		11.38	0.00335391		11.38	0.0219608		11.38	0.0199136		11.38	0.0161488		11.38	0.00167594		11.38	0.00882823
11.4	1.47817e-10		11.4	0.00336893		11.4	0.0220497		11.4	0.0199943		11.4	0.0162142		11.4	0.00168007		11.4	0.00887572
11.42	1.48098e-10		11.42	0.00338425		11.42	0.0221392		11.42	0.0200755		11.42	0.01628		11.42	0.00168431		11.42	0.0089238
11.44	1.4838e-10		11.44	0.00339992		11.44	0.0222293		11.44	0.0201573		11.44	0.0163462		11.44	0.00168865		11.44	0.00897247
11.46	1.48663e-10		11.46	0.00341595		11.46	0.0223199		11.46	0.0202395		11.46	0.0164128		11.46	0.00169311		11.46	0.00902176
11.48	4.73189e-05		11.48	0.00343239		11.48	0.022411		11.48	0.0203222		11.48	0.0164798		11.48	0.00169769		11.48	0.00907166
11.5	4.74513e-05		11.5	0.00344925		11.5	0.0225027		11.5	0.0204054		11.5	0.0165472		11.5	0.0017024		11.5	0.00912221
11.52	4.75842e-05		11.52	0.00346659		11.52	0.022595		11.52	0.0204892		11.52	0.0166151		11.52	0.00170723		11.52	0.0091734
11.54	4.77178e-05		11.54	0.00348444		11.54	0.0226878		11.54	0.0205734		11.54	0.0166833		11.54	0.00171221		11.54	0.00922524
11.56	7.14182e-05		11.56	0.00350285		11.56	0.0227813		11.56	0.0206582		11.56	0.016752		11.56	0.00171732		11.56	0.00927777
11.58	7.16189e-05		11.58	0.00352186		11.58	0.0228752		11.58	0.0207435		11.58	0.0168211		11.58	0.00172258		11.58	0.00933097
11.6	7.18204e-05		11.6	0.00354155		11.6	0.0229698		11.6	0.0208293		11.6	0.0168906		11.6	0.00172799		11.6	0.00938488
11.62	7.20227e-05		11.62	0.00356195		11.62	0.023065		11.62	0.0209157		11.62	0.0169605		11.62	0.00173357		11.62	0.0094395
11.64	7.22259e-05		11.64	0.00358315		11.64	0.0231607		11.64	0.0210026		11.64	0.0170309		11.64	0.00173931		11.64	0.00949485
11.66	7.243e-05		11.66	0.0036052		11.66	0.0232571		11.66	0.02109		11.66	0.0171017		11.66	0.00174522		11.66	0.00955095
11.68	7.2635e-05		11.68	0.00362819		11.68	0.023354		11.68	0.021178		11.68	0.017173		11.68	0.00175131		11.68	0.00960782
11.7	7.28408e-05		11.7	0.00365221		11.7	0.0234516		11.7	0.0212665		11.7	0.0172447		11.7	0.00175759		11.7	0.00966545
11.72	7.30474e-05		11.72	0.00367735		11.72	0.0235497		11.72	0.0213556		11.72	0.0173169		11.72	0.00176407		11.72	0.00972389
11.74	7.3255e-05		11.74	0.0037037		11.74	0.0236485		11.74	0.0214452		11.74	0.0173895		11.74	0.00177075		11.74	0.00978315
11.76	7.34634e-05		11.76	0.00373138		11.76	0.0237479		11.76	0.0215354		11.76	0.0174626		11.76	0.00177765		11.76	0.00984324
11.78	7.36728e-05		11.78	0.0037605		11.78	0.0238479		11.78	0.0216262		11.78	0.0175361		11.78	0.00178476		11.78	0.00990419
11.8	7.3883e-05		11.8	0.0037912		11.8	0.0239486		11.8	0.0217175		11.8	0.0176101		11.8	0.0017921		11.8	0.009966
11.82	7.40942e-05		11.82	0.00382362		11.82	0.0240499		11.82	0.0218094		11.82	0.0176846		11.82	0.00179969		11.82	0.0100287
11.84	7.43062e-05		11.84	0.00385791		11.84	0.0241518		11.84	0.0219019		11.84	0.0177595		11.84	0.00180752		11.84	0.0100923
11.86	7.45192e-05		11.86	0.00389423		11.86	0.0242544		11.86	0.021995		11.86	0.0178349		11.86	0.00181562		11.86	0.0101568
11.88	7.4733e-05		11.88	0.00393277		11.88	0.0243576		11.88	0.0220887		11.88	0.0179108		11.88	0.00182398		11.88	0.0102223
11.9	7.49478e-05		11.9	0.00397372		11.9	0.0244615		11.9	0.022183		11.9	0.0179872		11.9	0.00183263		11.9	0.0102887
11.92	7.51636e-05		11.92	0.00401728		11.92	0.0245661		11.92	0.0222779		11.92	0.0180641		11.92	0.00184156		11.92	0.010356
11.94	7.53802e-05		11.94	0.0040637		11.94	0.0246713		11.94	0.0223734		11.94	0.0181415		11.94	0.00185081		11.94	0.0104244
11.96	7.55978e-05		11.96	0.0041132		11.96	0.0247772		11.96	0.0224695		11.96	0.0182194		11.96	0.00186038		11.96	0.0104936
11.98	7.58163e-05		11.98	0.00416606		11.98	0.0248838		11.98	0.0225662		11.98	0.0182978		11.98	0.00187027		11.98	0.0105638
12	7.60358e-05		12	0.00422255		12	0.0249911		12	0.0226636		12	0.0183767		12	0.00188051		12	0.010635
12.02	7.62563e-05		12.02	0.00428299		12.02	0.025099		12.02	0.0227615		12.02	0.0184561		12.02	0.00189112		12.02	0.0107074
12.04	7.64777e-05		12.04	0.00434771		12.04	0.0252077		12.04	0.0228602		12.04	0.018536		12.04	0.0019021		12.04	0.010781
12.06	7.67e-05		12.06	0.00441705		12.06	0.0253171		12.06	0.0229594		12.06	0.0186165		12.06	0.00191348		12.06	0.0108557
12.08	7.69233e-05		12.08	0.0044914		12.08	0.0254271		12.08	0.0230593		12.08	0.0186975		12.08	0.00192526		12.08	0.0109317
12.1	7.71477e-05		12.1	0.00457118		12.1	0.0255379		12.1	0.0231599		12.1	0.0187791		12.1	0.00193747		12.1	0.0110089
12.12	7.73729e-05		12.12	0.0046568		12.12	0.0256495		12.12	0.0232611		12.12	0.0188612		12.12	0.00195013		12.12	0.0110872
12.14	7.75992e-05		12.14	0.00474876		12.14	0.0257617		12.14	0.0233629		12.14	0.0189438		12.14	0.00196326		12.14	0.0111669
12.16	7.78265e-05		12.16	0.00484754		12.16	0.0258747		12.16	0.0234655		12.16	0.0190271		12.16	0.00197688		12.16	0.0112478
12.18	7.80548e-05		12.18	0.00495369		12.18	0.0259884		12.18	0.0235687		12.18	0.0191109		12.18	0.00199101		12.18	0.01133
12.2	7.8284e-05		12.2	0.00506778		12.2	0.0261029		12.2	0.0236726		12.2	0.0191953		12.2	0.00200567		12.2	0.0114136
12.22	7.85144e-05		12.22	0.00519042		12.22	0.0262182		12.22	0.0237772		12.22	0.0192803		12.22	0.0020209		12.22	0.0114986
12.24	7.87457e-05		12.24	0.00532226		12.24	0.0263342		12.24	0.0238824		12.24	0.0193659		12.24	0.00203671		12.24	0.011585
12.26	7.8978e-05		12.26	0.00546401		12.26	0.0264509		12.26	0.0239884		12.26	0.0194522		12.26	0.00205314		12.26	0.0116728
12.28	7.92113e-05		12.28	0.00561641		12.28	0.0265685		12.28	0.0240951		12.28	0.0195391		12.28	0.00207022		12.28	0.0117621
12.3	7.94457e-05		12.3	0.00578023		12.3	0.0266868		12.3	0.0242025		12.3	0.0196267		12.3	0.00208798		12.3	0.011853
12.32	7.96812e-05		12.32	0.00595633		12.32	0.0268059		12.32	0.0243106		12.32	0.019715		12.32	0.00210646		12.32	0.0119454
12.34	7.99177e-05		12.34	0.00614558		12.34	0.0269258		12.34	0.0244194		12.34	0.019804		12.34	0.00212569		12.34	0.0120394
12.36	8.01552e-05		12.36	0.00634894		12.36	0.0270466		12.36	0.024529		12.36	0.0198937		12.36	0.00214571		12.36	0.012135
12.38	8.03938e-05		12.38	0.00656741		12.38	0.0271681		12.38	0.0246393		12.38	0.0199842		12.38	0.00216658		12.38	0.0122323
12.4	8.06335e-05		12.4	0.00680203		12.4	0.0272904		12.4	0.0247504		12.4	0.0200756		12.4	0.00218834		12.4	0.0123314
12.42	8.08743e-05		12.42	0.00705394		12.42	0.0274136		12.42	0.0248622		12.42	0.0201678		12.42	0.00221104		12.42	0.0124322
12.44	8.11161e-05		12.44	0.00732431		12.44	0.0275376		12.44	0.0249748		12.44	0.0202609		12.44	0.00223474		12.44	0.0125349
12.46	8.1359e-05		12.46	0.0076144		12.46	0.0276625		12.46	0.0250881		12.46	0.020355		12.46	0.0022595		12.46	0.0126395
12.48	8.1603e-05		12.48	0.00792551		12.48	0.0277881		12.48	0.0252022		12.48	0.0204502		12.48	0.00228538		12.48	0.0127459
12.5	8.18481e-05		12.5	0.00825904		12.5	0.0279147		12.5	0.0253172		12.5	0.0205464		12.5	0.00231246		12.5	0.0128544
12.52	8.20943e-05		12.52	0.00861644		12.52	0.0280421		12.52	0.0254329		12.52	0.0206439		12.52	0.00234081		12.52	0.0129649
12.54	8.23416e-05		12.54	0.00899924		12.54	0.0281704		12.54	0.0255494		12.54	0.0207426		12.54	0.00237052		12.54	0.0130776
12.56	8.259e-05		12.56	0.00940906		12.56	0.0282996		12.56	0.0256667		12.56	0.0208428		12.56	0.00240169		12.56	0.0131924
12.58	8.28396e-05		12.58	0.0098476		12.58	0.0284296		12.58	0.0257849		12.58	0.0209445		12.58	0.00243442		12.58	0.0133095
12.6	8.30903e-05		12.6	0.0103166		12.6	0.0285606		12.6	0.0259039		12.6	0.0210478		12.6	0.00246882		12.6	0.0134289
12.62	8.33421e-05		12.62	0.0108179		12.62	0.0286924		12.62	0.0260238		12.62	0.021153		12.62	0.002505		12.62	0.0135507
12.64	8.35951e-05		12.64	0.0113535		12.64	0.0288252		12.64	0.0261446		12.64	0.0212603		12.64	0.00254312		12.64	0.0136749
12.66	8.38492e-05		12.66	0.0119254		12.66	0.0289589		12.66	0.0262663		12.66	0.0213698		12.66	0.0025833		12.66	0.0138018
12.68	8.41045e-05		12.68	0.0125356		12.68	0.0290935		12.68	0.0263889		12.68	0.0214818		12.68	0.00262572		12.68	0.0139314
12.7	8.4361e-05		12.7	0.0131865		12.7	0.0292291		12.7	0.0265125		12.7	0.0215966		12.7	0.00267054		12.7	0.0140638
12.72	8.46186e-05		12.72	0.0138802		12.72	0.0293656		12.72	0.026637		12.72	0.0217145		12.72	0.00271797		12.72	0.0141991
12.74	8.48775e-05		12.74	0.0146192		12.74	0.0295031		12.74	0.0267626		12.74	0.0218359		12.74	0.00276821		12.74	0.0143375
12.76	8.51375e-05		12.76	0.0154059		12.76	0.0296416		12.76	0.0268892		12.76	0.0219611		12.76	0.00282148		12.76	0.014479
12.78	8.53987e-05		12.78	0.0162428		12.78	0.0297811		12.78	0.027017		12.78	0.0220907		12.78	0.00287805		12.78	0.014624
12.8	8.56611e-05		12.8	0.0171327		12.8	0.0299215		12.8	0.0271459		12.8	0.0222251		12.8	0.00293819		12.8	0.0147725
12.82	8.59247e-05		12.82	0.0180782		12.82	0.030063		12.82	0.0272761		12.82	0.0223649		12.82	0.00300221		12.82	0.0149248
12.84	8.61896e-05		12.84	0.0190822		12.84	0.0302056		12.84	0.0274076		12.84	0.0225108		12.84	0.00307042		12.84	0.015081
12.86	8.64556e-05		12.86	0.0201476		12.86	0.0303492		12.86	0.0275406		12.86	0.0226634		12.86	0.0031432		12.86	0.0152416
12.88	8.67229e-05		12.88	0.0212775		12.88	0.0304938		12.88	0.0276751		12.88	0.0228238		12.88	0.00322094		12.88	0.0154066
12.9	8.69915e-05		12.9	0.0224748		12.9	0.0306397		12.9	0.0278113		12.9	0.0229926		12.9	0.00330407		12.9	0.0156324
12.92	8.72613e-05		12.92	0.0237428		12.92	0.0307866		12.92	0.0279494		12.92	0.023171		12.92	0.00339306		12.92	0.0158077
12.94	8.75323e-05		12.94	0.0250847		12.94	0.0309348		12.94	0.0280895		12.94	0.0233602		12.94	0.00348842		12.94	0.0159887
12.96	8.78046e-05		12.96	0.0265038		12.96	0.0310842		12.96	0.0282319		12.96	0.0235613		12.96	0.00359071		12.96	0.0161759
12.98	8.80782e-05		12.98	0.0280036		12.98	0.0312349		12.98	0.0283769		12.98	0.0237757		12.98	0.00370054		12.98	0.0163698
13	8.83531e-05		13	0.0295875		13	0.031387		13	0.0285247		13	0.0240052		13	0.00381857		13	0.0165712
13.02	8.86292e-05		13.02	0.0312591		13.02	0.0315406		13.02	0.0286758		13.02	0.0242512		13.02	0.00394551		13.02	0.0168083
13.04	8.89066e-05		13.04	0.033022		13.04	0.0316957		13.04	0.0288306		13.04	0.0245159		13.04	0.00408215		13.04	0.0170268
13.06	8.91854e-05		13.06	0.0348798		13.06	0.0318526		13.06	0.0289896		13.06	0.0248012		13.06	0.00422932		13.06	0.0172551
13.08	8.94655e-05		13.08	0.0368362		13.08	0.0320113		13.08	0.0291534		13.08	0.0251096		13.08	0.00438794		13.08	0.0174944
13.1	8.97469e-05		13.1	0.038895		13.1	0.0321721		13.1	0.0293226		13.1	0.0254434		13.1	0.00455901		13.1	0.017746
13.12	9.00296e-05		13.12	0.0410599		13.12	0.0323351		13.12	0.0294982		13.12	0.0258055		13.12	0.00474358		13.12	0.0180112
13.14	9.03136e-05		13.14	0.0433347		13.14	0.0325007		13.14	0.029681		13.14	0.026199		13.14	0.00494282		13.14	0.0182917
13.16	9.05991e-05		13.16	0.0457234		13.16	0.0326693		13.16	0.0298721		13.16	0.0266272		13.16	0.00515795		13.16	0.0185893
13.18	9.08858e-05		13.18	0.0482296		13.18	0.0328411		13.18	0.0300728		13.18	0.0270936		13.18	0.00539032		13.18	0.0189061
13.2	9.11739e-05		13.2	0.0508573		13.2	0.0330168		13.2	0.0302844		13.2	0.0276022		13.2	0.00564137		13.2	0.0192446
13.22	9.14634e-05		13.22	0.0536102		13.22	0.0331968		13.22	0.0305086		13.22	0.0281574		13.22	0.00591264		13.22	0.0196073
13.24	9.17543e-05		13.24	0.0564922		13.24	0.0333819		13.24	0.0307473		13.24	0.0287636		13.24	0.00620579		13.24	0.0199974
13.26	9.20465e-05		13.26	0.059507		13.26	0.0335729		13.26	0.0310026		13.26	0.0294259		13.26	0.00652258		13.26	0.0204184
13.28	9.23402e-05		13.28	0.0626583		13.28	0.0337709		13.28	0.0312768		13.28	0.0301497		13.28	0.00686491		13.28	0.0208742
13.3	9.26352e-05		13.3	0.0659498		13.3	0.0339769		13.3	0.0315728		13.3	0.0309407		13.3	0.00723481		13.3	0.0213693
13.32	9.29317e-05		13.32	0.0693851		13.32	0.0341924		13.32	0.0318936		13.32	0.0318052		13.32	0.00763443		13.32	0.0219087
13.34	9.32297e-05		13.34	0.0729677		13.34	0.034419		13.34	0.0322427		13.34	0.0327498		13.34	0.00806606		13.34	0.022498
13.36	9.3529e-05		13.36	0.0767009		13.36	0.0346586		13.36	0.032624		13.36	0.0337816		13.36	0.00853216		13.36	0.0231437
13.38	9.38298e-05		13.38	0.0805882		13.38	0.0349134		13.38	0.0330418		13.38	0.0349083		13.38	0.00903531		13.38	0.0238527
13.4	9.4132e-05		13.4	0.0846325		13.4	0.035186		13.4	0.033501		13.4	0.0361378		13.4	0.00957826		13.4	0.0246331
13.42	9.44357e-05		13.42	0.088837		13.42	0.0354794		13.42	0.034007		13.42	0.0374787		13.42	0.0101639		13.42	0.0254939
13.44	9.47409e-05		13.44	0.0932045		13.44	0.0357971		13.44	0.0345659		13.44	0.0389401		13.44	0.0107953		13.44	0.0264449
13.46	9.50476e-05		13.46	0.0977378		13.46	0.036143		13.46	0.0351842		13.46	0.0405315		13.46	0.0114758		13.46	0.0274972
13.48	9.53557e-05		13.48	0.102439		13.48	0.0365217		13.48	0.0358693		13.48	0.0422629		13.48	0.0122086		13.48	0.0286632
13.5	9.56654e-05		13.5	0.107311		13.5	0.0369385		13.5	0.0366292		13.5	0.044145		13.5	0.0129974		13.5	0.0299564
13.52	9.59765e-05		13.52	0.112355		13.52	0.0373991		13.52	0.0374727		13.52	0.0461886		13.52	0.013846		13.52	0.0313919
13.54	9.62892e-05		13.54	0.117574		13.54	0.0379105		13.54	0.0384093		13.54	0.0484054		13.54	0.0147583		13.54	0.0329864
13.56	9.66034e-05		13.56	0.122969		13.56	0.0384801		13.56	0.0394494		13.56	0.0508073		13.56	0.0157383		13.56	0.0347581
13.58	9.69192e-05		13.58	0.128541		13.58	0.0391164		13.58	0.0406042		13.58	0.0534068		13.58	0.0167904		13.58	0.0367274
13.6	9.72365e-05		13.6	0.134291		13.6	0.0398289		13.6	0.041886		13.6	0.0562167		13.6	0.017919		13.6	0.0389162
13.62	9.75553e-05		13.62	0.14022		13.62	0.0406283		13.62	0.0433076		13.62	0.0592502		13.62	0.0191287		13.62	0.0413487
13.64	9.78757e-05		13.64	0.146328		13.64	0.0415262		13.64	0.044883		13.64	0.062521		13.64	0.0204244		13.64	0.0440514
13.66	9.81978e-05		13.66	0.152615		13.66	0.0425357		13.66	0.0466271		13.66	0.066043		13.66	0.021811		13.66	0.0470529
13.68	9.85213e-05		13.68	0.159082		13.68	0.0436709		13.68	0.0485555		13.68	0.0698302		13.68	0.0232936		13.68	0.0503845
13.7	9.88466e-05		13.7	0.165726		13.7	0.0449475		13.7	0.0506849		13.7	0.0738971		13.7	0.0248775		13.7	0.05408
13.72	9.91734e-05		13.72	0.172548		13.72	0.0463822		13.72	0.0530325		13.72	0.0782582		13.72	0.026568		13.72	0.0581759
13.74	9.95018e-05		13.74	0.179545		13.74	0.0479935		13.74	0.0556168		13.74	0.082928		13.74	0.0283708		13.74	0.0627117
13.76	9.98319e-05		13.76	0.186717		13.76	0.049801		13.76	0.0584564		13.76	0.0879211		13.76	0.0302915		13.76	0.0677297
13.78	0.000100164		13.78	0.194059		13.78	0.0518258		13.78	0.0615712		13.78	0.0932519		13.78	0.0323358		13.78	0.0732753
13.8	0.000100497		13.8	0.201571		13.8	0.0540902		13.8	0.0649811		13.8	0.0989348		13.8	0.0345096		13.8	0.0793973
13.82	0.000100832		13.82	0.209247		13.82	0.0566181		13.82	0.0687066		13.82	0.104984		13.82	0.0368188		13.82	0.0861473
13.84	0.000101169		13.84	0.217086		13.84	0.0594342		13.84	0.0727688		13.84	0.111412		13.84	0.0392693		13.84	0.0935806
13.86	0.000101507		13.86	0.225083		13.86	0.0625646		13.86	0.0771884		13.86	0.118234		13.86	0.0418673		13.86	0.101755
13.88	0.000101847		13.88	0.233233		13.88	0.0660361		13.88	0.0819865		13.88	0.125461		13.88	0.0446187		13.88	0.110733
13.9	0.000102189		13.9	0.241531		13.9	0.0698763		13.9	0.0871837		13.9	0.133104		13.9	0.0475294		13.9	0.12058
13.92	0.000102533		13.92	0.249972		13.92	0.0741133		13.92	0.0928002		13.92	0.141176		13.92	0.0506056		13.92	0.131363
13.94	0.000102878		13.94	0.258549		13.94	0.0787755		13.94	0.0988558		13.94	0.149686		13.94	0.053853		13.94	0.143154
13.96	0.000103225		13.96	0.267257		13.96	0.083891		13.96	0.105369		13.96	0.158643		13.96	0.0572774		13.96	0.156028
13.98	0.000103574		13.98	0.276087		13.98	0.0894877		13.98	0.112357		13.98	0.168054		13.98	0.0608846		13.98	0.170062
14	0.000103924		14	0.285034		14	0.0955927		14	0.119836		14	0.177925		14	0.06468		14	0.185336
14.02	0.000104277		14.02	0.294089		14.02	0.102232		14.02	0.127821		14.02	0.188262		14.02	0.068669		14.02	0.201933
14.04	0.000104631		14.04	0.303243		14.04	0.109429		14.04	0.136323		14.04	0.199068		14.04	0.0728565		14.04	0.219937
14.06	0.000104987		14.06	0.312488		14.06	0.117206		14.06	0.145352		14.06	0.210342		14.06	0.0772475		14.06	0.239435
14.08	0.000105344		14.08	0.321814		14.08	0.125583		14.08	0.154916		14.08	0.222086		14.08	0.0818465		14.08	0.260515
14.1	0.000105704		14.1	0.331212		14.1	0.134575		14.1	0.165019		14.1	0.234296		14.1	0.0866576		14.1	0.283267
14.12	0.000106065		14.12	0.340671		14.12	0.144195		14.12	0.175661		14.12	0.246968		14.12	0.0916846		14.12	0.307779
14.14	0.000106429		14.14	0.350182		14.14	0.154452		14.14	0.186841		14.14	0.260094		14.14	0.0969309		14.14	0.334141
14.16	0.000106794		14.16	0.359732		14.16	0.165347		14.16	0.198551		14.16	0.273665		14.16	0.102399		14.16	0.362442
14.18	0.000107161		14.18	0.369311		14.18	0.176881		14.18	0.210782		14.18	0.287669		14.18	0.108092		14.18	0.392769
14.2	0.00010753		14.2	0.378907		14.2	0.189045		14.2	0.223519		14.2	0.302093		14.2	0.114012		14.2	0.425209
14.22	0.000107901		14.22	0.388508		14.22	0.201825		14.22	0.236742		14.22	0.316918		14.22	0.120159		14.22	0.459844
14.24	0.000108274		14.24	0.398101		14.24	0.215201		14.24	0.250428		14.24	0.332125		14.24	0.126535		14.24	0.496753
14.26	0.000108648		14.26	0.407674		14.26	0.229146		14.26	0.264548		14.26	0.347693		14.26	0.133139		14.26	0.536012
14.28	0.000109026		14.28	0.417214		14.28	0.243626		14.28	0.27907		14.28	0.363595		14.28	0.13997		14.28	0.577689
14.3	0.000109405		14.3	0.426707		14.3	0.258597		14.3	0.293955		14.3	0.379806		14.3	0.147028		14.3	0.621849
14.32	0.000109787		14.32	0.436141		14.32	0.274013		14.32	0.309161		14.32	0.396295		14.32	0.15431		14.32	0.668549
14.34	0.00011017		14.34	0.445502		14.34	0.289815		14.34	0.324639		14.34	0.413028		14.34	0.161813		14.34	0.717836
14.36	0.000110555		14.36	0.454775		14.36	0.305941		14.36	0.340338		14.36	0.429971		14.36	0.169533		14.36	0.76975
14.38	0.000110942		14.38	0.463948		14.38	0.322319		14.38	0.356202		14.38	0.447086		14.38	0.177466		14.38	0.824321
14.4	0.000111331		14.4	0.473006		14.4	0.338873		14.4	0.37217		14.4	0.464333		14.4	0.185606		14.4	0.881568
14.42	0.000111722		14.42	0.481935		14.42	0.355518		14.42	0.388177		14.42	0.481669		14.42	0.193947		14.42	0.941497
14.44	0.000112115		14.44	0.490722		14.44	0.372165		14.44	0.404157		14.44	0.49905		14.44	0.202482		14.44	1.0041
14.46	0.000112511		14.46	0.499352		14.46	0.388722		14.46	0.420038		14.46	0.51643		14.46	0.211201		14.46	1.06937
14.48	0.000112908		14.48	0.507812		14.48	0.405088		14.48	0.435748		14.48	0.53376		14.48	0.220097		14.48	1.13726
14.5	0.000113308		14.5	0.516087		14.5	0.421165		14.5	0.451211		14.5	0.550992		14.5	0.229159		14.5	1.20772
14.52	0.00011371		14.52	0.524165		14.52	0.436848		14.52	0.466352		14.52	0.568073		14.52	0.238376		14.52	1.28069
14.54	0.000114115		14.54	0.532031		14.54	0.452034		14.54	0.481093		14.54	0.584953		14.54	0.247737		14.54	1.3561
14.56	0.000114521		14.56	0.539673		14.56	0.466617		14.56	0.495357		14.56	0.601578		14.56	0.257228		14.56	1.43383
14.58	0.00011493		14.58	0.547077		14.58	0.480497		14.58	0.509068		14.58	0.617896		14.58	0.266835		14.58	1.51379
14.6	0.000115342		14.6	0.554231		14.6	0.493573		14.6	0.52215		14.6	0.633852		14.6	0.276545		14.6	1.59583
14.62	0.000115755		14.62	0.561122		14.62	0.505747		14.62	0.53453		14.62	0.649394		14.62	0.286342		14.62	1.6798
14.64	0.000116171		14.64	0.567739		14.64	0.51693		14.64	0.546137		14.64	0.664467		14.64	0.296211		14.64	1.76554
14.66	0.00011659		14.66	0.574069		14.66	0.527035		14.66	0.556904		14.66	0.679019		14.66	0.306133		14.66	1.85286
14.68	0.000117011		14.68	0.580102		14.68	0.535985		14.68	0.566768		14.68	0.692999		14.68	0.316091		14.68	1.94156
14.7	0.000117434		14.7	0.585828		14.7	0.54371		14.7	0.57567		14.7	0.706357		14.7	0.326068		14.7	2.03142
14.72	0.00011786		14.72	0.591235		14.72	0.550149		14.72	0.583557		14.72	0.719043		14.72	0.336044		14.72	2.1222
14.74	0.000118289		14.74	0.596314		14.74	0.555252		14.74	0.59038		14.74	0.73101		14.74	0.346		14.74	2.21365
14.76	0.000118721		14.76	0.601056		14.76	0.55898		14.76	0.5961		14.76	0.742213		14.76	0.355917		14.76	2.3055
14.78	0.000119155		14.78	0.605453		14.78	0.561303		14.78	0.60068		14.78	0.752611		14.78	0.365773		14.78	2.39748
14.8	0.000119592		14.8	0.609497		14.8	0.562357		14.8	0.604093		14.8	0.762164		14.8	0.375548		14.8	2.48928
14.82	0.000120032		14.82	0.613181		14.82	0.562577		14.82	0.606321		14.82	0.770834		14.82	0.385222		14.82	2.5806
14.84	0.000120475		14.84	0.616497		14.84	0.562103		14.84	0.607403		14.84	0.778588		14.84	0.394773		14.84	2.67114
14.86	0.000120921		14.86	0.619441		14.86	0.56113		14.86	0.607662		14.86	0.785396		14.86	0.40418		14.86	2.76055
14.88	0.00012137		14.88	0.622006		14.88	0.559666		14.88	0.607196		14.88	0.791233		14.88	0.413422		14.88	2.84852
14.9	0.000121823		14.9	0.62419		14.9	0.557716		14.9	0.606166		14.9	0.796074		14.9	0.422478		14.9	2.93471
14.92	0.000122278		14.92	0.625988		14.92	0.555286		14.92	0.60459		14.92	0.799901		14.92	0.431327		14.92	3.01877
14.94	0.000122738		14.94	0.627397		14.94	0.552385		14.94	0.602473		14.94	0.802699		14.94	0.439948		14.94	3.10037
14.96	0.0001232		14.96	0.628415		14.96	0.549022		14.96	0.599822		14.96	0.80446		14.96	0.448322		14.96	3.17917
14.98	0.000123667		14.98	0.629035		14.98	0.545207		14.98	0.596645		14.98	0.805167		14.98	0.456427		14.98	3.25483
15	0.000124137		15	0.629084		15	0.540953		15	0.592954		15	0.804795		15	0.464245		15	3.32702
15.02	0.000124612		15.02	0.628468		15.02	0.536273		15.02	0.588758		15.02	0.80334		15.02	0.471758		15.02	3.39541
15.04	0.000125091		15.04	0.627096		15.04	0.531181		15.04	0.584074		15.04	0.800798		15.04	0.478947		15.04	3.4597
15.06	0.000125574		15.06	0.624946		15.06	0.525692		15.06	0.578913		15.06	0.797181		15.06	0.485794		15.06	3.51959
15.08	0.000126062		15.08	0.622026		15.08	0.519823		15.08	0.573292		15.08	0.792505		15.08	0.492284		15.08	3.57478
15.1	0.000126555		15.1	0.61835		15.1	0.513591		15.1	0.567228		15.1	0.786792		15.1	0.498402		15.1	3.62501
15.12	0.000127052		15.12	0.613932		15.12	0.507014		15.12	0.56074		15.12	0.780067		15.12	0.504132		15.12	3.67004
15.14	0.000127556		15.14	0.60879		15.14	0.50011		15.14	0.553846		15.14	0.77236		15.14	0.509463		15.14	3.70962
15.16	0.000128065		15.16	0.602947		15.16	0.492901		15.16	0.546565		15.16	0.763703		15.16	0.514381		15.16	3.74358
15.18	0.00012858		15.18	0.596425		15.18	0.485404		15.18	0.53892		15.18	0.754135		15.18	0.518876		15.18	3.77172
15.2	0.000129102		15.2	0.589249		15.2	0.477642		15.2	0.530932		15.2	0.743695		15.2	0.522939		15.2	3.79391
15.22	0.00012963		15.22	0.58145		15.22	0.469634		15.22	0.522623		15.22	0.732428		15.22	0.526561		15.22	3.81002
15.24	0.000130166		15.24	0.573055		15.24	0.461403		15.24	0.514016		15.24	0.72038		15.24	0.529736		15.24	3.81998
15.26	0.000130709		15.26	0.564097		15.26	0.452969		15.26	0.505135		15.26	0.7076		15.26	0.532458		15.26	3.80806
15.28	0.000131261		15.28	0.554611		15.28	0.444355		15.28	0.496003		15.28	0.694139		15.28	0.534724		15.28	3.70202
15.3	0.000131822		15.3	0.544631		15.3	0.435582		15.3	0.486644		15.3	0.680052		15.3	0.53602		15.3	3.50615
15.32	0.000132392		15.32	0.534194		15.32	0.426672		15.32	0.477082		15.32	0.665392		15.32	0.526698		15.32	3.22496
15.34	0.000132973		15.34	0.523337		15.34	0.417646		15.34	0.467342		15.34	0.650216		15.34	0.505294		15.34	2.90598
15.36	0.000133564		15.36	0.5121		15.36	0.408526		15.36	0.457447		15.36	0.634581		15.36	0.472075		15.36	2.5946
15.38	0.000134168		15.38	0.50052		15.38	0.399333		15.38	0.447422		15.38	0.618543		15.38	0.432549		15.38	2.32131
15.4	0.000134784		15.4	0.488637		15.4	0.390088		15.4	0.437291		15.4	0.602161		15.4	0.393316		15.4	2.09969
15.42	0.000135414		15.42	0.476492		15.42	0.38081		15.42	0.427078		15.42	0.585491		15.42	0.358971		15.42	1.92984
15.44	0.000136058		15.44	0.464123		15.44	0.37152		15.44	0.416804		15.44	0.568592		15.44	0.331653		15.44	1.80347
15.46	0.000136718		15.46	0.451571		15.46	0.362238		15.46	0.406494		15.46	0.551518		15.46	0.311463		15.46	1.70887
15.48	0.000137396		15.48	0.438875		15.48	0.352981		15.48	0.396168		15.48	0.534326		15.48	0.297241		15.48	1.63426
15.5	0.000138092		15.5	0.426073		15.5	0.343768		15.5	0.38585		15.5	0.517068		15.5	0.287304		15.5	1.56982
15.52	0.000138809		15.52	0.413203		15.52	0.334616		15.52	0.375559		15.52	0.499797		15.52	0.279971		15.52	1.50846
15.54	0.000139547		15.54	0.400302		15.54	0.325542		15.54	0.365316		15.54	0.482563		15.54	0.273864		15.54	1.44587
15.56	0.000140309		15.56	0.387405		15.56	0.316561		15.56	0.35514		15.56	0.465414		15.56	0.268016		15.56	1.38003
15.58	0.000141097		15.58	0.374548		15.58	0.307689		15.58	0.34505		15.58	0.448396		15.58	0.261867		15.58	1.3107
15.6	0.000141912		15.6	0.361764		15.6	0.29894		15.6	0.335062		15.6	0.431553		15.6	0.255189		15.6	1.23869
15.62	0.000142757		15.62	0.349085		15.62	0.290327		15.62	0.325195		15.62	0.414926		15.62	0.247996		15.62	1.1654
15.64	0.000143635		15.64	0.33654		15.64	0.281862		15.64	0.315464		15.64	0.398553		15.64	0.240446		15.64	1.0924
15.66	0.000144548		15.66	0.324158		15.66	0.273557		15.66	0.305882		15.66	0.382469		15.66	0.232761		15.66	1.0211
15.68	0.0001455		15.68	0.311967		15.68	0.265422		15.68	0.296465		15.68	0.366708		15.68	0.225173		15.68	0.952678
15.7	0.000146494		15.7	0.299991		15.7	0.257468		15.7	0.287225		15.7	0.351298		15.7	0.217884		15.7	0.887969
15.72	0.000147532		15.72	0.288253		15.72	0.249702		15.72	0.278174		15.72	0.336268		15.72	0.211052		15.72	0.827484
15.74	0.00014862		15.74	0.276775		15.74	0.242133		15.74	0.269322		15.74	0.32164		15.74	0.204784		15.74	0.771459
15.76	0.000149761		15.76	0.265576		15.76	0.234768		15.76	0.260679		15.76	0.307436		15.76	0.199139		15.76	0.719908
15.78	0.000150959		15.78	0.254673		15.78	0.227612		15.78	0.252254		15.78	0.293674		15.78	0.194139		15.78	0.672689
15.8	0.000152221		15.8	0.244083		15.8	0.220672		15.8	0.244055		15.8	0.280369		15.8	0.189776		15.8	0.629558
15.82	0.00015355		15.82	0.233819		15.82	0.213951		15.82	0.236088		15.82	0.267535		15.82	0.186023		15.82	0.590218
15.84	0.000154953		15.84	0.223892		15.84	0.207453		15.84	0.228358		15.84	0.25518		15.84	0.182841		15.84	0.554345
15.86	0.000156437		15.86	0.214313		15.86	0.201181		15.86	0.220872		15.86	0.243312		15.86	0.180186		15.86	0.521617
15.88	0.000158007		15.88	0.20509		15.88	0.195136		15.88	0.213632		15.88	0.231936		15.88	0.178014		15.88	0.491727
15.9	0.000159671		15.9	0.196229		15.9	0.18932		15.9	0.206641		15.9	0.221054		15.9	0.17628		15.9	0.46439
15.92	0.000161438		15.92	0.187736		15.92	0.183734		15.92	0.199902		15.92	0.210668		15.92	0.174943		15.92	0.439346
15.94	0.000163315		15.94	0.179614		15.94	0.178377		15.94	0.193417		15.94	0.200775		15.94	0.173965		15.94	0.416363
15.96	0.000165313		15.96	0.171863		15.96	0.173249		15.96	0.187185		15.96	0.191371		15.96	0.173313		15.96	0.395234
15.98	0.00016744		15.98	0.164486		15.98	0.168349		15.98	0.181206		15.98	0.182452		15.98	0.172957		15.98	0.375774
16	0.000169709		16	0.157481		16	0.163674		16	0.175479		16	0.174009		16	0.172871		16	0.357821
16.02	0.00017213		16.02	0.150845		16.02	0.159222		16.02	0.170004		16.02	0.166036		16.02	0.173031		16.02	0.341231
16.04	0.000174716		16.04	0.144575		16.04	0.154991		16.04	0.164777		16.04	0.158521		16.04	0.173416		16.04	0.325875
16.06	0.000177482		16.06	0.138668		16.06	0.150976		16.06	0.159796		16.06	0.151454		16.06	0.17401		16.06	0.311642
16.08	0.000180441		16.08	0.133116		16.08	0.147175		16.08	0.155058		16.08	0.144824		16.08	0.174795		16.08	0.298431
16.1	0.000183609		16.1	0.127915		16.1	0.143583		16.1	0.150558		16.1	0.138616		16.1	0.175757		16.1	0.286151
16.12	0.000187004		16.12	0.123057		16.12	0.140196		16.12	0.146293		16.12	0.132817		16.12	0.176885		16.12	0.274724
16.14	0.000190644		16.14	0.118534		16.14	0.13701		16.14	0.142258		16.14	0.127414		16.14	0.178167		16.14	0.264077
16.16	0.000194549		16.16	0.114337		16.16	0.134018		16.16	0.138448		16.16	0.122391		16.16	0.179593		16.16	0.254146
16.18	0.000198739		16.18	0.110459		16.18	0.131217		16.18	0.134858		16.18	0.117733		16.18	0.181154		16.18	0.244875
16.2	0.000203239		16.2	0.106889		16.2	0.128601		16.2	0.131482		16.2	0.113425		16.2	0.182842		16.2	0.236211
16.22	0.000208072		16.22	0.103619		16.22	0.126164		16.22	0.128315		16.22	0.109452		16.22	0.184651		16.22	0.228108
16.24	0.000213264		16.24	0.100637		16.24	0.1239		16.24	0.12535		16.24	0.105798		16.24	0.186573		16.24	0.220523
16.26	0.000218845		16.26	0.097934		16.26	0.121806		16.26	0.122581		16.26	0.102447		16.26	0.188604		16.26	0.213419
16.28	0.000224845		16.28	0.0954995		16.28	0.119873		16.28	0.120002		16.28	0.0993836		16.28	0.190737		16.28	0.20676
16.3	0.000231297		16.3	0.0933231		16.3	0.118097		16.3	0.117607		16.3	0.0965936		16.3	0.192968		16.3	0.200516
16.32	0.000238235		16.32	0.0913945		16.32	0.116472		16.32	0.115389		16.32	0.0940615		16.32	0.195293		16.32	0.194658
16.34	0.000245696		16.34	0.0897033		16.34	0.114992		16.34	0.113342		16.34	0.0917728		16.34	0.197707		16.34	0.18916
16.36	0.000253723		16.36	0.0882391		16.36	0.113652		16.36	0.111459		16.36	0.0897133		16.36	0.200208		16.36	0.183997
16.38	0.000262357		16.38	0.0869919		16.38	0.112445		16.38	0.109734		16.38	0.0878692		16.38	0.202792		16.38	0.179149
16.4	0.000271645		16.4	0.0859518		16.4	0.111367		16.4	0.10816		16.4	0.0862271		16.4	0.205456		16.4	0.174596
16.42	0.000281636		16.42	0.085109		16.42	0.110411		16.42	0.106731		16.42	0.0847742		16.42	0.208197		16.42	0.170318
16.44	0.000292383		16.44	0.084454		16.44	0.109572		16.44	0.105442		16.44	0.0834981		16.44	0.211012		16.44	0.166301
16.46	0.000303943		16.46	0.0839776		16.46	0.108846		16.46	0.104285		16.46	0.0823871		16.46	0.2139		16.46	0.162527
16.48	0.000316376		16.48	0.0836708		16.48	0.108226		16.48	0.103254		16.48	0.0814298		16.48	0.216858		16.48	0.158984
16.5	0.000329746		16.5	0.0835251		16.5	0.107708		16.5	0.102345		16.5	0.0806156		16.5	0.219884		16.5	0.155659
16.52	0.000344123		16.52	0.0835322		16.52	0.107287		16.52	0.10155		16.52	0.0799343		16.52	0.222976		16.52	0.152538
16.54	0.00035958		16.54	0.083684		16.54	0.106958		16.54	0.100865		16.54	0.0793762		16.54	0.226132		16.54	0.149612
16.56	0.000376195		16.56	0.0839731		16.56	0.106717		16.56	0.100284		16.56	0.0789322		16.56	0.229351		16.56	0.146869
16.58	0.000394052		16.58	0.0843922		16.58	0.106559		16.58	0.0998018		16.58	0.078594		16.58	0.232631		16.58	0.144301
16.6	0.00041324		16.6	0.0849344		16.6	0.10648		16.6	0.0994133		16.6	0.0783533		16.6	0.235971		16.6	0.141899
16.62	0.000433854		16.62	0.0855931		16.62	0.106476		16.62	0.0991137		16.62	0.0782029		16.62	0.239369		16.62	0.139655
16.64	0.000455995		16.64	0.0863623		16.64	0.106543		16.64	0.0988983		16.64	0.0781356		16.64	0.242824		16.64	0.137561
16.66	0.00047977		16.66	0.0872361		16.66	0.106678		16.66	0.0987626		16.66	0.078145		16.66	0.246335		16.66	0.13561
16.68	0.000505294		16.68	0.0882091		16.68	0.106877		16.68	0.0987023		16.68	0.078225		16.68	0.2499		16.68	0.133796
16.7	0.000532688		16.7	0.0892761		16.7	0.107136		16.7	0.0987133		16.7	0.0783701		16.7	0.253518		16.7	0.132113
16.72	0.000562082		16.72	0.0904323		16.72	0.107452		16.72	0.0987917		16.72	0.0785751		16.72	0.257188		16.72	0.130555
16.74	0.000593612		16.74	0.0916734		16.74	0.107823		16.74	0.0989337		16.74	0.0788353		16.74	0.26091		16.74	0.129116
16.76	0.000627424		16.76	0.0929951		16.76	0.108245		16.76	0.099136		16.76	0.0791462		16.76	0.264681		16.76	0.127793
16.78	0.000663673		16.78	0.0943936		16.78	0.108716		16.78	0.099395		16.78	0.079504		16.78	0.268501		16.78	0.12658
16.8	0.000702521		16.8	0.0958654		16.8	0.109234		16.8	0.0997076		16.8	0.0799049		16.8	0.272369		16.8	0.125473
16.82	0.000744144		16.82	0.0974071		16.82	0.109795		16.82	0.100071		16.82	0.0803457		16.82	0.276285		16.82	0.124469
16.84	0.000788725		16.84	0.0990157		16.84	0.110398		16.84	0.100482		16.84	0.0808232		16.84	0.280246		16.84	0.123563
16.86	0.000836458		16.86	0.100689		16.86	0.11104		16.86	0.100939		16.86	0.0813349		16.86	0.284252		16.86	0.122752
16.88	0.000887551		16.88	0.102423		16.88	0.11172		16.88	0.101438		16.88	0.081878		16.88	0.288302		16.88	0.122033
16.9	0.000942221		16.9	0.104217		16.9	0.112436		16.9	0.101978		16.9	0.0824506		16.9	0.292396		16.9	0.121402
16.92	0.0010007		16.92	0.106068		16.92	0.113186		16.92	0.102556		16.92	0.0830505		16.92	0.296532		16.92	0.120857
16.94	0.00106323		16.94	0.107974		16.94	0.113969		16.94	0.10317		16.94	0.0836759		16.94	0.300709		16.94	0.120395
16.96	0.00113006		16.96	0.109934		16.96	0.114782		16.96	0.103819		16.96	0.0843253		16.96	0.304926		16.96	0.120014
16.98	0.00120148		16.98	0.111946		16.98	0.115626		16.98	0.1045		16.98	0.0849973		16.98	0.309184		16.98	0.119711
17	0.00127777		17	0.114009		17	0.116498		17	0.105213		17	0.0856905		17	0.31348		17	0.119483
17.02	0.00135923		17.02	0.116121		17.02	0.117397		17.02	0.105955		17.02	0.0864039		17.02	0.317813		17.02	0.11933
17.04	0.00144618		17.04	0.118281		17.04	0.118323		17.04	0.106725		17.04	0.0871365		17.04	0.322184		17.04	0.119247
17.06	0.00153895		17.06	0.120489		17.06	0.119274		17.06	0.107523		17.06	0.0878875		17.06	0.32659		17.06	0.119235
17.08	0.0016379		17.08	0.122743		17.08	0.12025		17.08	0.108346		17.08	0.0886561		17.08	0.331032		17.08	0.119291
17.1	0.0017434		17.1	0.125043		17.1	0.12125		17.1	0.109194		17.1	0.0894418		17.1	0.335507		17.1	0.119413
17.12	0.00185585		17.12	0.127389		17.12	0.122273		17.12	0.110066		17.12	0.0902439		17.12	0.340016		17.12	0.119599
17.14	0.00197565		17.14	0.129778		17.14	0.123318		17.14	0.110961		17.14	0.091062		17.14	0.344557		17.14	0.119848
17.16	0.00210325		17.16	0.132212		17.16	0.124385		17.16	0.111878		17.16	0.0918959		17.16	0.34913		17.16	0.120159
17.18	0.00223908		17.18	0.13469		17.18	0.125474		17.18	0.112817		17.18	0.0927451		17.18	0.353733		17.18	0.12053
17.2	0.00238364		17.2	0.137211		17.2	0.126584		17.2	0.113776		17.2	0.0936095		17.2	0.358365		17.2	0.12096
17.22	0.00253742		17.22	0.139775		17.22	0.127715		17.22	0.114756		17.22	0.0944888		17.22	0.363026		17.22	0.121447
17.24	0.00270096		17.24	0.142381		17.24	0.128866		17.24	0.115756		17.24	0.095383		17.24	0.367714		17.24	0.121991
17.26	0.00287478		17.26	0.145031		17.26	0.130036		17.26	0.116775		17.26	0.0962919		17.26	0.372429		17.26	0.12259
17.28	0.00305949		17.28	0.147723		17.28	0.131227		17.28	0.117812		17.28	0.0972156		17.28	0.377169		17.28	0.123242
17.3	0.00325567		17.3	0.150457		17.3	0.132437		17.3	0.118869		17.3	0.098154		17.3	0.381934		17.3	0.124024
17.32	0.00346397		17.32	0.153234		17.32	0.133667		17.32	0.119944		17.32	0.0991072		17.32	0.386723		17.32	0.124781
17.34	0.00368504		17.34	0.156053		17.34	0.134916		17.34	0.121037		17.34	0.100075		17.34	0.391534		17.34	0.125588
17.36	0.00391957		17.36	0.158915		17.36	0.136184		17.36	0.122147		17.36	0.101058		17.36	0.396366		17.36	0.126446
17.38	0.00416829		17.38	0.161819		17.38	0.137471		17.38	0.123276		17.38	0.102056		17.38	0.401219		17.38	0.127352
17.4	0.00443196		17.4	0.164765		17.4	0.138777		17.4	0.124422		17.4	0.103069		17.4	0.406091		17.4	0.128305
17.42	0.00471134		17.42	0.167754		17.42	0.140102		17.42	0.125585		17.42	0.104098		17.42	0.410981		17.42	0.129344
[truncated: 2,129 more rows]

## Sheet: Fig5
5A	Caculated size-dependent radiative lifetimes					5B	Size-dependent Boltzmann probabilities of the 6 lowest excitons in orthorhombic CsPbI3								5C	Exciton energy level diagram for CsPbI3 NCs ranging from 2.5 - 6.9 nm
[truncated: 1,028 more rows]
[truncated: 17 more columns]

[truncated: 10 more sheets: Suppl Fig1, Suppl. Fig2, Suppl. Fig3, Suppl. Fig4, Suppl. Fig5, Suppl. Fig6, Suppl. Fig7, Suppl. Fig8, Suppl. Fig 9-10, Suppl. Fig11]
